# Supplementary material for: Evolutionary insights from comparative transcriptome and transcriptome-wide coalescence analyses in Tetrastigma hemsleyanum
Source: PubMed Central journal article supplement (PMC6154912; doi:10.1186/s12870-018-1429-8), 2018-09-24

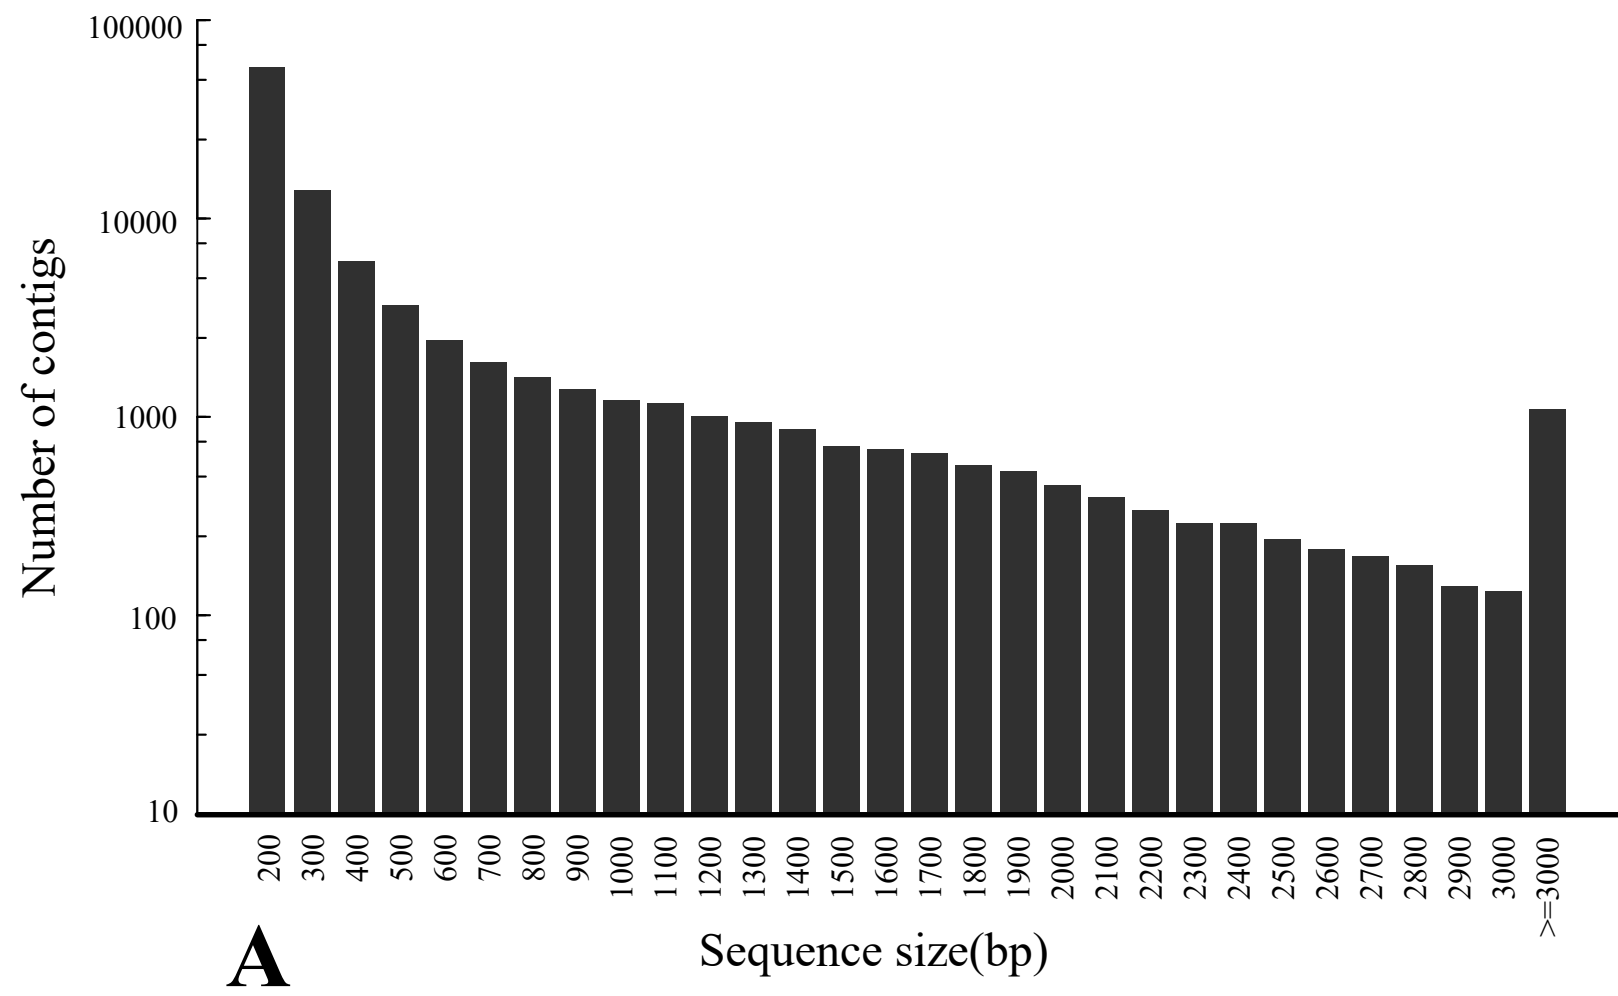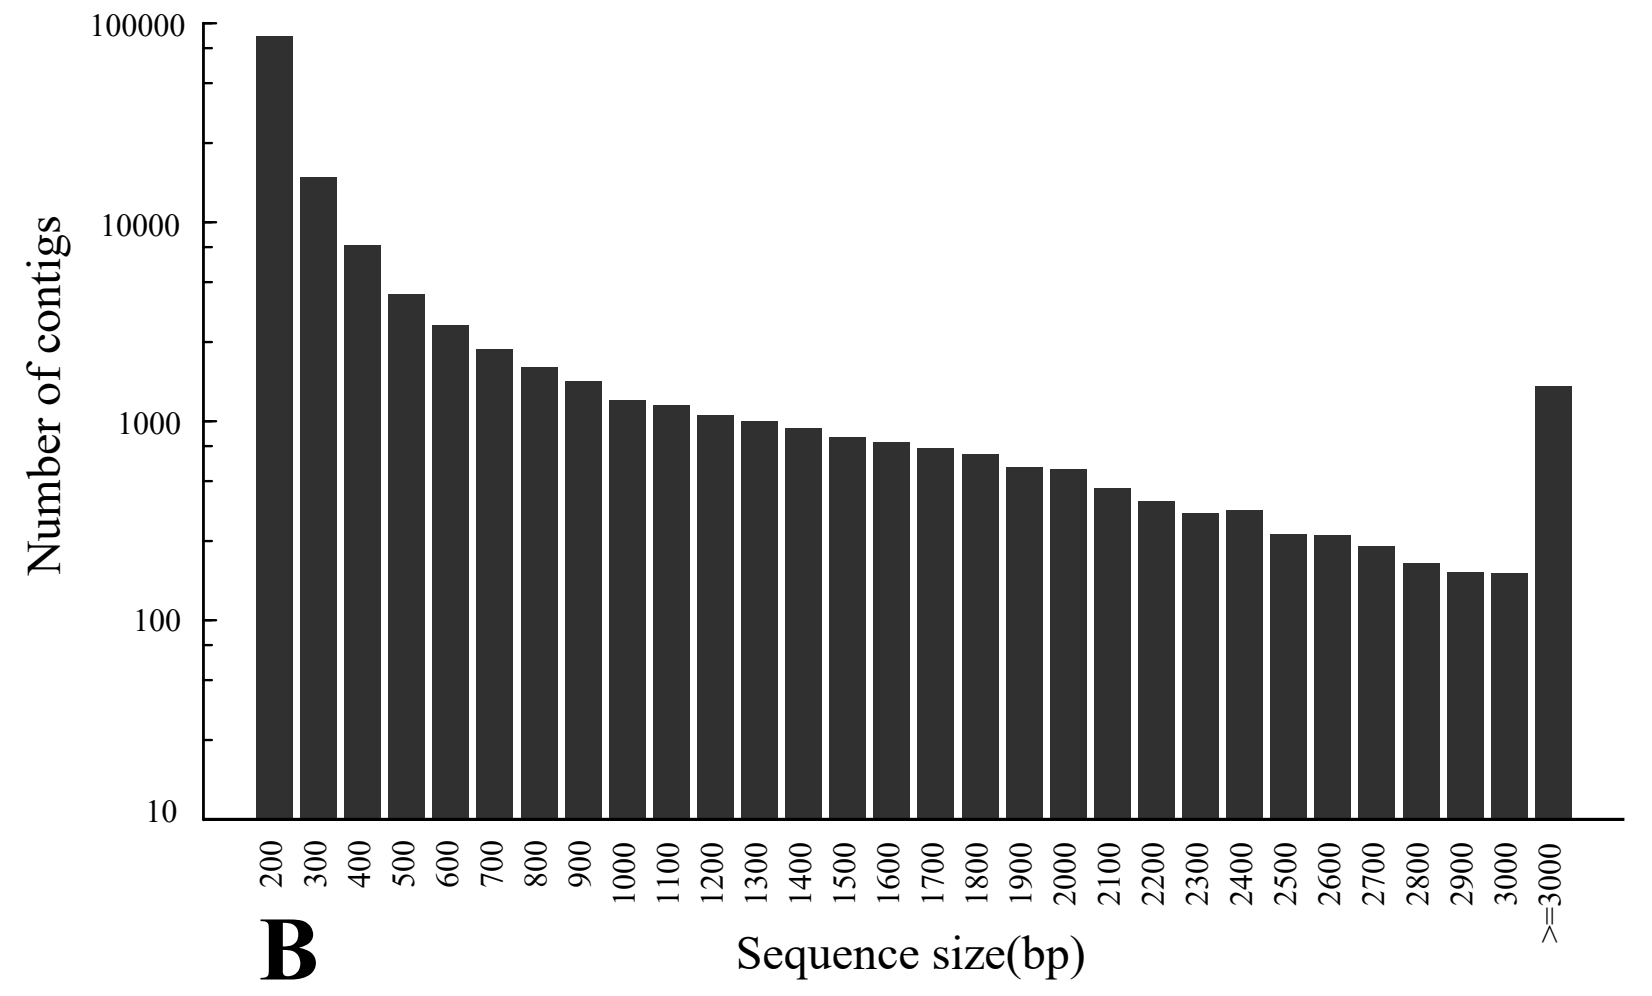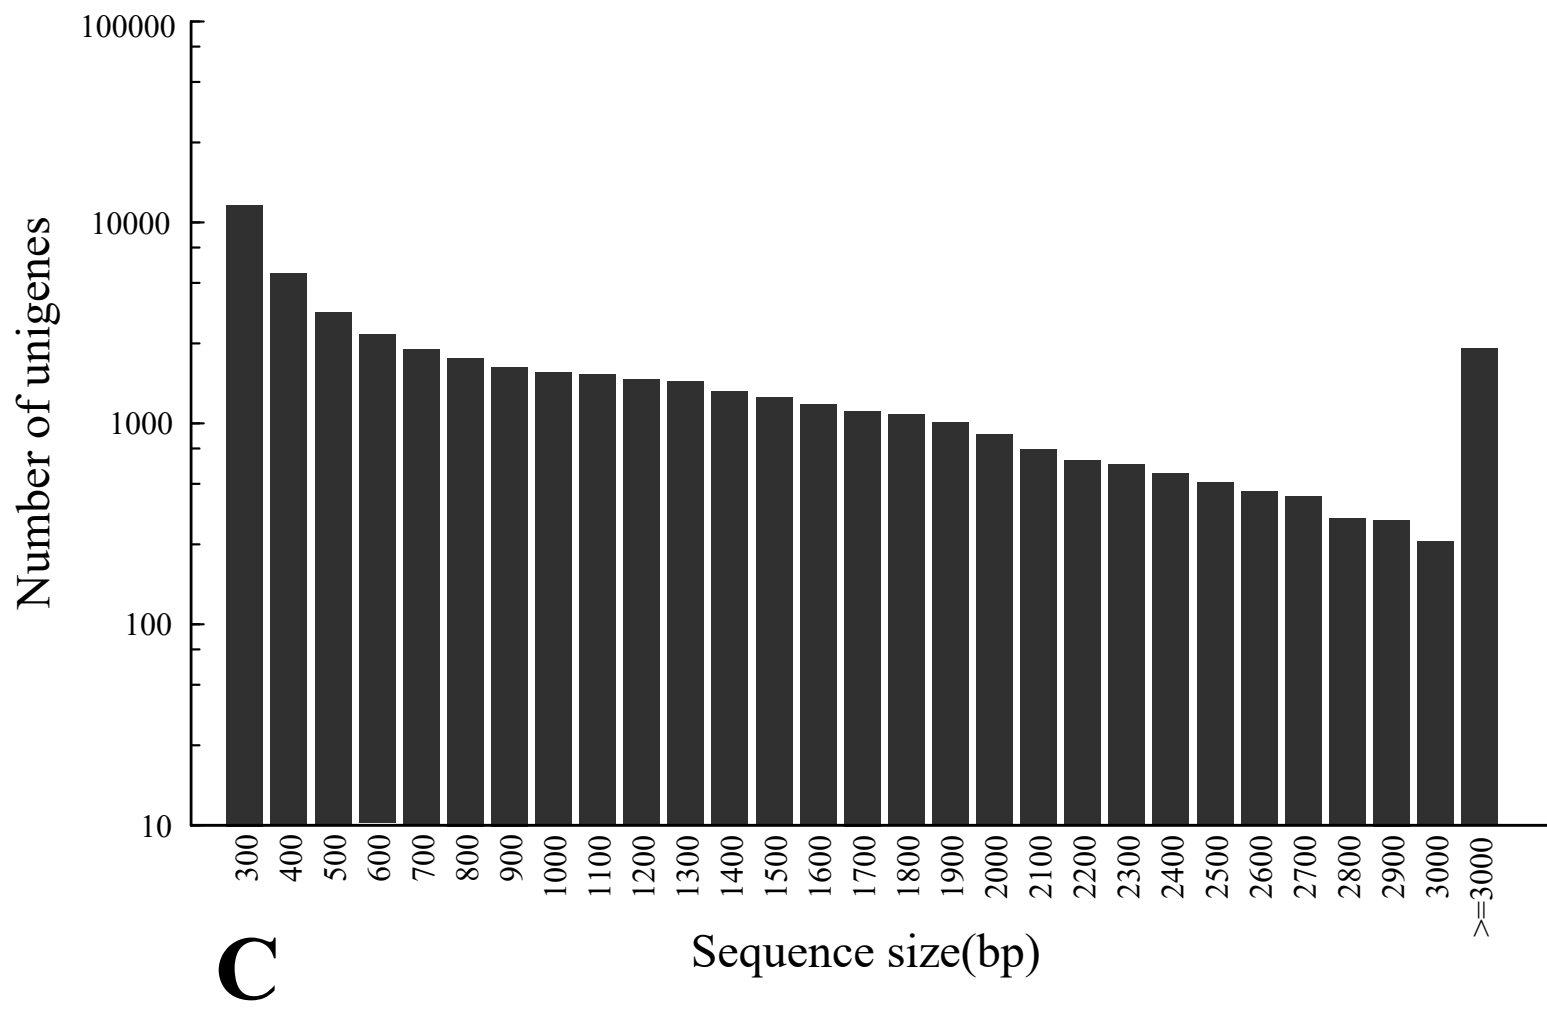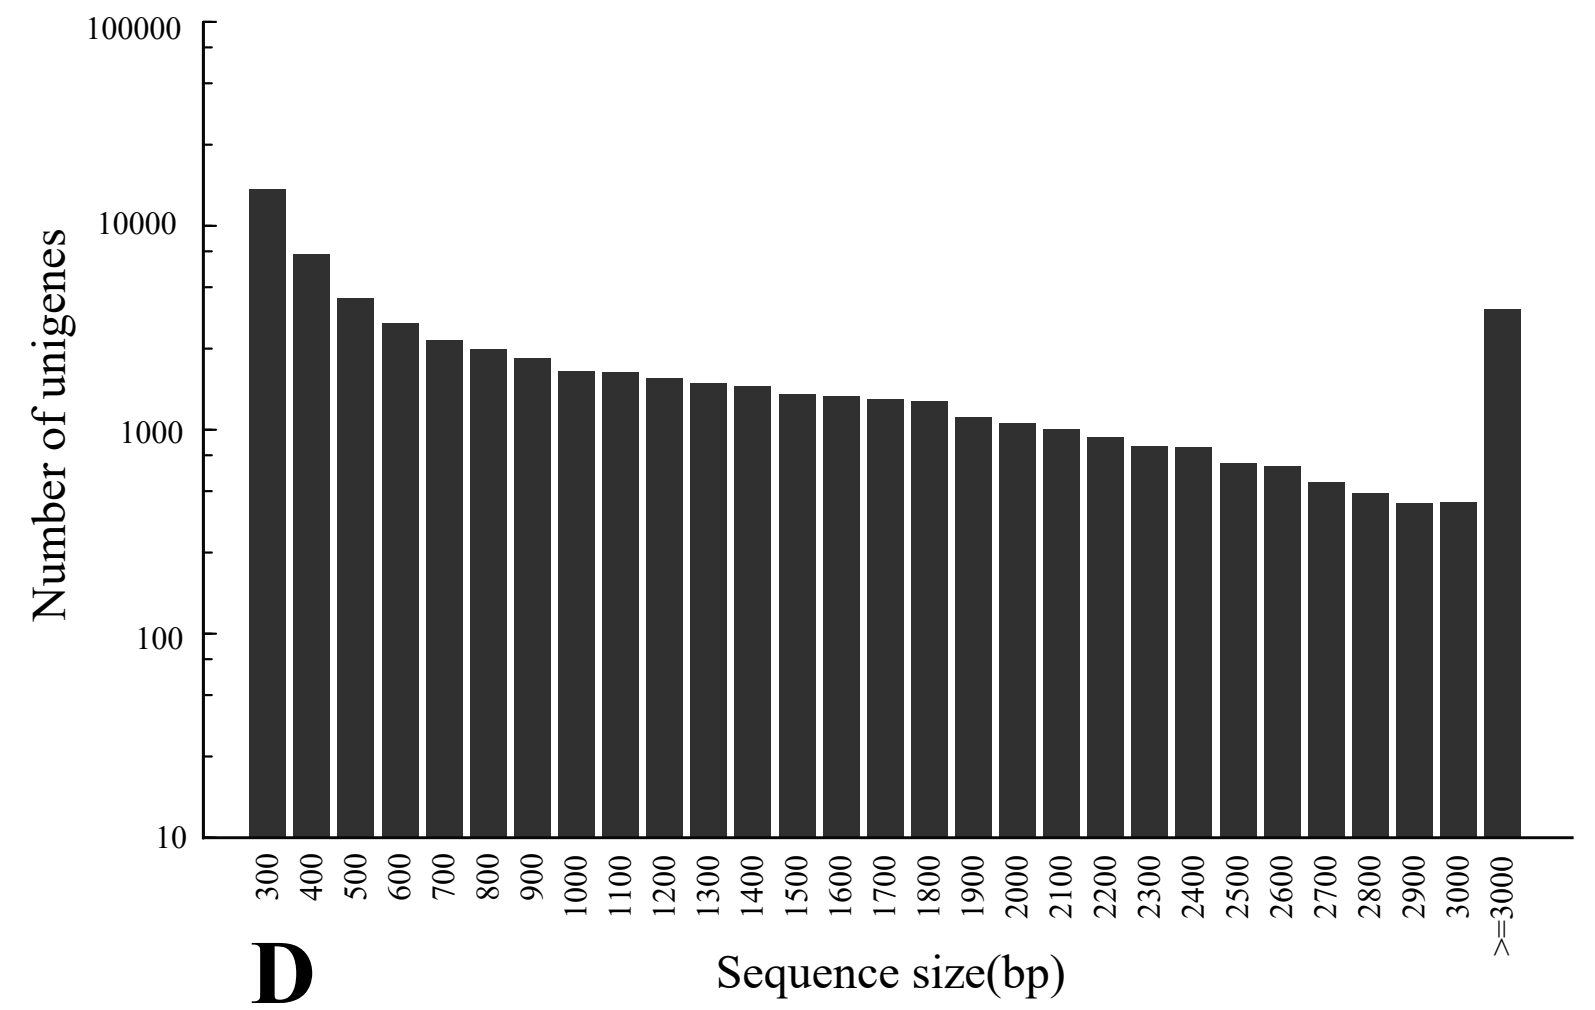

Supplement: 12870_2018_1429_MOESM2_ESM.pdf [file 12870_2018_1429_MOESM2_ESM.pdf]
