# Supplementary material for: Evolutionary insights from comparative transcriptome and transcriptome-wide coalescence analyses in Tetrastigma hemsleyanum
Source: BMC Plant Biol. 2018 Sep 24;18:208. doi: 10.1186/s12870-018-1429-8 (PMC6154912; doi:10.1186/s12870-018-1429-8)
Supplement: Supplementary file 1 — Figure S1. Size frequency distribution of contigs (a, CSE lineage; b, SW lineage) and unigenes (c, CSE lineage; d, SW lineage). (XLS 1093 kb) [file 12870_2018_1429_MOESM1_ESM.xls]

## Sheet: tableS1
Table S1 Characteristics of the twelve nuclear primer pairs newly developed in this study based on SCNG loci identified by different approaches
Sequence ID		Primer ID	Sequence（5'–3'）	Annealing temperature (°C)	Product Size (bp)	SCNG identification approaches			AT annotation (PLAZA 2.5 database)
CSE lineage	SW lineage					Markerminer	APVO gene set	Vitaceae gene set
Unigene18740	Unigene19709	Th-5F	GCAAGAGGTCTGAGAAGGATT	53.2	944	+(Mostly)	+	-	AT3G54460:SNF2 domain-containing protein / helicase domain-containing protein / F-box family protein
		Th-5R	TGTGTTAGGAGTCGGTGTTC	52.9
Unigene15386	Unigene22243	Th-41F	CAAGCACGACTCCGATAGC	53.9	625	+(Mostly)	-	+	AT1G08315:ARM repeat superfamily protein
		Th-41R	TGACACAGCATTCTCCTTAGC	53.9
Unigene18350	Unigene13972	ThR-3F	TGCCTACATTACATCGCTGGT	55.4	893	+(Strictly)	-	+	AT1G17870:ethylene-dependent gravitropism-deficient and yellow-green-like 3
		ThR-3R	TTCATCTGTTGCTGGTACTTCTTC	55.5
Unigene16250	Unigene6646	ThR-6F	CGCAGAATCTCCGAAGACCTAA	56	895	+(Strictly)	+	-	AT2G39910:ARM repeat superfamily protein
		ThR-6R	ACAAGAAGCACAGACATCTCAAC	55.5
Unigene19053	CL1776_Contig3	ThR-11F	GCGGTGGATTCTGTGCTTAT	54	776	+(Strictly)	+	+	AT5G26040:histone deacetylase 2
		ThR-11R	GCCAGGTACTCATCAGTTGTG	54.6
Unigene19206	Unigene13074	ThR-19F	AGATCAGCACGACACTTCCA	54.6	476	+(Mostly)	+	-	AT1G31730:Adaptin family protein
		ThR-19R	CAACCTTGTGGCTAGTAGAAGAC	55.1
CL3642_Contig3	CL1107_Contig3	ThR-7F	TGTTGACTGACCATAATGAGGAAG	55	463	+(Strictly)	+	-	AT2G26810:Putative methyltransferase family protein
		ThR-7R	GCTCGTGATACATAGGCAAGAAT	55
CL7056_Contig2	CL3924_Contig2	ThR-27F	TGTCATACCAGCACCCAATAG	53.3	871	+(Mostly)	+	-	AT5G58760:damaged DNA binding 2
		ThR-27R	ATTCCAGTCTCCAAGTCAGTG	53.2
CL6017_Contig2	Unigene23060	ThR-28F	GCCAAGGTGATAGAGACAGTG	54	791	+(Mostly)	+	-	AT1G07970:unnamed protein product
		ThR-28R	GCCTCAATCGCTTCTTCCAT	54
Unigene12514	Unigene14911	ThR-31F	AACCAGATGACCACAAGGAAG	53.7	580	+(Mostly)	+	-	AT5G05490:Rad21/Rec8-like family protein
		ThR-31R	GAAGAGGTGCTGGATATTGGAT	53.7
Unigene18823	Unigene16035	ThR-33F	TGCTGCTAGAACCATCAACAAGT	56.8	783	+(Mostly)	+	-	AT4G14605:Mitochondrial transcription termination factor family protein
		ThR-33R	CTTCACCTTCTGCCTGCTATAAGT	56.9
CL520_Contig1	CL5247_Contig1	ThR-34F	TCTCCAGAACCTCTTCCAGAC	54.3	542	+(Mostly)	+	-	AT5G52190:Sugar isomerase (SIS) family protein
		ThR-34R	TTCAAGATTGGTATGGCGTGAT	54.2

## Sheet: tableS2
Table S2 Full list of 1018 SCNG loci identified from the transcriptomes of CSE and SW lineage, with their basic information including identification approaches, substitution rates between lineages and gene annotations. '+' denotes the approaches that supported the single-copy status of the locus.
No.	CSE lineage	SW lineage	SCNG identification approaches			Length	Pairwise identity (%)	Substitutions	S-Substitutions	N-Substitutions	Ka/Ks	P-Value(Fisher)	Gene annotations
			APVO gene set	Vitaceae gene set	Markerminer (Single copy status)								Nr-ID	Nr-annotation	Nt-ID	Nt-annotation	Swissprot-ID	Swissprot-annotation	COG-ID	COG-Function-Description	KO_id	KEGG-Gene	ko_definition	GO-BiologicalProcess	GO-MolecularFunction	Go-CellularComponent
1	CSE_Unigene19906	SW_Unigene15968	+	+	+(Mostly)	2322	0.99	23	11.8027	11.1973	0.321472	0.00536381	gi|225426862|ref|XP_002276931.1|	PREDICTED: uncharacterized protein LOC100265091 [Vitis vinifera]	gi|225426861|ref|XM_002276895.1|	PREDICTED: Vitis vinifera uncharacterized LOC100265091 (LOC100265091), mRNA	sp|Q1XDE2|RR1_PORYE	30S ribosomal protein S1, chloroplastic OS=Porphyra yezoensis GN=rps1 PE=3 SV=2	COG0539	Ribosomal protein S1	K14792	smo:SELMODRAFT_451253	rRNA biogenesis protein RRP5	GO:0006098//pentose-phosphate shunt;GO:0016117//carotenoid biosynthetic process;GO:0006655//phosphatidylglycerol biosynthetic process;GO:0019252//starch biosynthetic process;GO:0019288//isopentenyl diphosphate biosynthetic process, mevalonate-independent pathway;GO:0009902//chloroplast relocation;GO:0015995//chlorophyll biosynthetic process;GO:0034660//ncRNA metabolic process;GO:0019344//cysteine…	-	GO:0009507//chloroplast
2	CSE_Unigene17003	SW_Unigene6556	+	+	+(Mostly)	768	0.995	4	1	3	1.14768	0.721117	gi|225432302|ref|XP_002273600.1|	PREDICTED: alanyl-tRNA editing protein AlaX-L-like [Vitis vinifera]	gi|225432301|ref|XM_002273564.1|	PREDICTED: Vitis vinifera alanyl-tRNA editing protein AlaX-L-like (LOC100244170), mRNA	sp|Q015G2|SYAP_OSTTA	Probable alanine-tRNA ligase, chloroplastic OS=Ostreococcus tauri GN=Ot07g01940 PE=3 SV=1	COG0013	Alanyl-tRNA synthetase	K01872	ota:Ot07g01940	alanyl-tRNA synthetase [EC:6.1.1.7]	GO:0006419//alanyl-tRNA aminoacylation	GO:0003676//nucleic acid binding;GO:0004813//alanine-tRNA ligase activity;GO:0005524//ATP binding	GO:0005737//cytoplasm
3	CSE_CL2396_Contig2	SW_CL7775_Contig2	+	+	+(Mostly)	1389	0.992	11	6	5	0.291002	0.0412731	gi|225435925|ref|XP_002267920.1|	PREDICTED: cysteine desulfurase 2, chloroplastic [Vitis vinifera] >gi|296083920|emb|CBI24308.3| unnamed protein product [Vitis vinifera]	gi|225435924|ref|XM_002267884.1|	PREDICTED: Vitis vinifera cysteine desulfurase 2, chloroplastic-like (LOC100246217), mRNA	sp|Q93WX6|NFS2_ARATH	Cysteine desulfurase 2, chloroplastic OS=Arabidopsis thaliana GN=NFS2 PE=1 SV=1	COG0520	Selenocysteine lyase	K11717	vvi:100246217	cysteine desulfurase / selenocysteine lyase [EC:2.8.1.7 4.4.1.16]	GO:0018283//iron incorporation into metallo-sulfur cluster;GO:0000302//response to reactive oxygen species;GO:0010039//response to iron ion;GO:0001887//selenium compound metabolic process;GO:0055072//iron ion homeostasis;GO:0010269//response to selenium ion;GO:0006534//cysteine metabolic process;GO:0009073//aromatic amino acid family biosynthetic process	GO:0008483//transaminase activity;GO:0031071//cysteine desulfurase activity;GO:0009000//selenocysteine lyase activity;GO:0030170//pyridoxal phosphate binding	GO:0009507//chloroplast
4	CSE_CL6456_Contig1	SW_CL2614_Contig2	+	+	+(Mostly)	1245	0.993	9	2	7	1.34179	0.946508	gi|225439176|ref|XP_002274655.1|	PREDICTED: uncharacterized protein LOC100258667 [Vitis vinifera] >gi|296085885|emb|CBI31209.3| unnamed protein product [Vitis vinifera]	gi|225439175|ref|XM_002274619.1|	PREDICTED: Vitis vinifera uncharacterized LOC100258667 (LOC100258667), mRNA	sp|Q8RWM3|MED27_ARATH	Mediator of RNA polymerase II transcription subunit 27 OS=Arabidopsis thaliana GN=MED27 PE=1 SV=1	-	-	K15170	vvi:100258667	mediator of RNA polymerase II transcription subunit 27	GO:0046482//para-aminobenzoic acid metabolic process	-	GO:0016592//mediator complex;GO:0016023//cytoplasmic membrane-bounded vesicle
5	CSE_CL6877_Contig1	SW_Unigene22504	+	+	+(Mostly)	1869	0.994	11	4	7	0.482438	0.199083	gi|302144065|emb|CBI23170.3|	unnamed protein product [Vitis vinifera]	gi|359483319|ref|XM_002265042.2|	PREDICTED: Vitis vinifera tyrosyl-DNA phosphodiesterase 1-like (LOC100247070), mRNA	-	-	-	-	K10862	vvi:100247070	tyrosyl-DNA phosphodiesterase 1 [EC:3.1.4.-]	GO:0009616//virus induced gene silencing;GO:0010050//vegetative phase change;GO:0006281//DNA repair	GO:0017005//3'-tyrosyl-DNA phosphodiesterase activity	GO:0005634//nucleus
6	CSE_Unigene13550	SW_Unigene5500	+	+	+(Mostly)	795	0.994	5	2	3	0.536412	0.395646	gi|225463464|ref|XP_002272948.1|	PREDICTED: uncharacterized protein LOC100248593 [Vitis vinifera]	gi|225463463|ref|XM_002272912.1|	PREDICTED: Vitis vinifera uncharacterized LOC100248593 (LOC100248593), mRNA	-	-	-	-	-	-	-	-	-	GO:0016020//membrane;GO:0009507//chloroplast
7	CSE_Unigene16544	SW_Unigene16710	+	+	+(Mostly)	1386	0.99	14	7	7	0.271016	0.0168777	gi|225444999|ref|XP_002282931.1|	PREDICTED: histone acetyltransferase type B catalytic subunit [Vitis vinifera]	gi|225444998|ref|XM_002282895.1|	PREDICTED: Vitis vinifera histone acetyltransferase type B catalytic subunit-like (LOC100250987), mRNA	sp|Q9FJT8|HATB_ARATH	Histone acetyltransferase type B catalytic subunit OS=Arabidopsis thaliana GN=HAG2 PE=2 SV=1	-	-	K11303	vvi:100250987	histone acetyltransferase 1 [EC:2.3.1.48]	GO:0006261//DNA-dependent DNA replication;GO:0048449//floral organ formation;GO:0009909//regulation of flower development;GO:0016573//histone acetylation;GO:0006348//chromatin silencing at telomere	GO:0010485//H4 histone acetyltransferase activity	GO:0005829//cytosol;GO:0005634//nucleus
8	CSE_CL5301_Contig2	SW_CL4399_Contig2	+	+	+(Mostly)	1185	0.996	5	3	2	0.212957	0.0952905	gi|359487720|ref|XP_002281063.2|	PREDICTED: DNA excision repair protein ERCC-1-like [Vitis vinifera] >gi|296088298|emb|CBI36743.3| unnamed protein product [Vitis vinifera]	gi|359487719|ref|XM_002281027.2|	PREDICTED: Vitis vinifera DNA excision repair protein ERCC-1-like (LOC100244316), mRNA	sp|Q9MA98|ERCC1_ARATH	DNA excision repair protein ERCC-1 OS=Arabidopsis thaliana GN=ERCC1 PE=2 SV=1	COG5241	Nucleotide excision repair endonuclease NEF1, RAD10 subunit	K10849	vvi:100244316	DNA excision repair protein ERCC-1	GO:0010332//response to gamma radiation;GO:0010213//non-photoreactive DNA repair;GO:0010224//response to UV-B;GO:0006284//base-excision repair;GO:0000724//double-strand break repair via homologous recombination;GO:0000956//nuclear-transcribed mRNA catabolic process;GO:0006294//nucleotide-excision repair, preincision complex assembly	GO:0003684//damaged DNA binding;GO:0017108//5'-flap endonuclease activity	GO:0005634//nucleus
9	CSE_Unigene20106	SW_Unigene16769	+	+	+(Mostly)	2946	0.992	25	16	9	0.236405	0.000394172	gi|147863226|emb|CAN82620.1|	hypothetical protein VITISV_002311 [Vitis vinifera]	gi|225450925|ref|XM_002284540.1|	PREDICTED: Vitis vinifera mannosylglycoprotein endo-beta-mannosidase-like (LOC100254646), mRNA	sp|Q5H7P5|EBM_LILLO	Mannosylglycoprotein endo-beta-mannosidase OS=Lilium longiflorum GN=EBM PE=1 SV=4	COG3250	Beta-galactosidase/beta-glucuronidase	K01192	vcn:VOLCADRAFT_118894	beta-mannosidase [EC:3.2.1.25]	GO:0005975//carbohydrate metabolic process	GO:0033947	GO:0005773//vacuole
10	CSE_CL7632_Contig1	SW_CL5404_Contig1	+	+	+(Mostly)	1170	0.995	6	3	3	0.365881	0.199373	gi|225453122|ref|XP_002272712.1|	PREDICTED: uncharacterized protein C20orf4 homolog [Vitis vinifera] >gi|296087181|emb|CBI33555.3| unnamed protein product [Vitis vinifera]	gi|359488206|ref|XM_002272676.2|	PREDICTED: Vitis vinifera uncharacterized LOC100267400 (LOC100267400), mRNA	-	-	-	-	K13205	vvi:100267400	A1 cistron-splicing factor AAR2	GO:0000278//mitotic cell cycle;GO:0006457//protein folding;GO:0009644//response to high light intensity;GO:0042542//response to hydrogen peroxide;GO:0009408//response to heat;GO:0006396//RNA processing	-	GO:0009507//chloroplast
11	CSE_Unigene18445	SW_Unigene17567	+	+	+(Mostly)	1620	0.997	5	3	2	0.209178	0.0918619	gi|225451864|ref|XP_002278588.1|	PREDICTED: protein furry homolog-like [Vitis vinifera]	gi|359488316|ref|XM_002278552.2|	PREDICTED: Vitis vinifera protein furry homolog-like (LOC100251481), mRNA	-	-	-	-	-	-	-	GO:0006487//protein N-linked glycosylation	-	GO:0005886//plasma membrane;GO:0005739//mitochondrion
12	CSE_Unigene14898	SW_Unigene10977	+	+	+(Mostly)	990	0.991	9	6	3	0.124833	0.00315581	gi|225453762|ref|XP_002274443.1|	PREDICTED: protein-ribulosamine 3-kinase, chloroplastic [Vitis vinifera] >gi|296089080|emb|CBI38783.3| unnamed protein product [Vitis vinifera]	gi|359489364|ref|XM_002274407.2|	PREDICTED: Vitis vinifera protein-ribulosamine 3-kinase, chloroplastic-like (LOC100252411), mRNA	sp|Q9LEW8|FN3KR_ARATH	Protein-ribulosamine 3-kinase, chloroplastic OS=Arabidopsis thaliana GN=At3g61080 PE=1 SV=2	COG3001	Fructosamine-3-kinase	-	-	-	GO:0015996//chlorophyll catabolic process;GO:0016310//phosphorylation	GO:0016301//kinase activity	GO:0009507//chloroplast;GO:0005739//mitochondrion
13	CSE_Unigene12181	SW_Unigene8585	+	+	+(Mostly)	981	0.998	2	1	1	0.299199	0.355365	gi|225458790|ref|XP_002285179.1|	PREDICTED: arginine N-methyltransferase 2 isoform 1 [Vitis vinifera]	gi|349716132|emb|FQ397114.1|	Vitis vinifera clone SS0AEB7YM17	sp|Q9SAR5|AKR2_ARATH	Ankyrin repeat domain-containing protein 2 OS=Arabidopsis thaliana GN=AKR2 PE=1 SV=2	COG0666	FOG: Ankyrin repeat	K00599	olu:OSTLU_86989	[EC:2.1.1.-]	GO:0035246//peptidyl-arginine N-methylation;GO:0009165//nucleotide biosynthetic process	GO:0030731//guanidinoacetate N-methyltransferase activity;GO:0016274//protein-arginine N-methyltransferase activity	GO:0005737//cytoplasm
14	CSE_Unigene19053	SW_CL1776_Contig3	+	+	+(Strictly)	1074	0.996	4	2	2	0.321853	0.248188	gi|225429480|ref|XP_002277742.1|	PREDICTED: histone deacetylase 2 [Vitis vinifera] >gi|296081627|emb|CBI20632.3| unnamed protein product [Vitis vinifera]	gi|359476228|ref|XM_002277706.2|	PREDICTED: Vitis vinifera histone deacetylase 2-like (LOC100264550), mRNA	sp|Q944K3|HDA2_ARATH	Histone deacetylase 2 OS=Arabidopsis thaliana GN=HDA2 PE=1 SV=2	COG0123	Deacetylases, including yeast histone deacetylase and acetoin utilization protein	K11418	vvi:100264550	histone deacetylase 11 [EC:3.5.1.98]	-	GO:0004407//histone deacetylase activity	GO:0005634//nucleus
15	CSE_Unigene13292	SW_CL8264_Contig1	+	-	+(Mostly)	552	0.995	3	1	2	0.679799	0.569312	gi|359496253|ref|XP_003635192.1|	PREDICTED: uncharacterized protein LOC100259710 isoform 2 [Vitis vinifera]	gi|359496252|ref|XM_003635144.1|	PREDICTED: Vitis vinifera uncharacterized LOC100259710, transcript variant 2 (LOC100259710), mRNA	-	-	COG2938	Uncharacterized conserved protein	-	-	-	GO:0009062//fatty acid catabolic process;GO:0080022//primary root development	GO:0008177//succinate dehydrogenase (ubiquinone) activity	GO:0005739//mitochondrion
16	CSE_CL1475_Contig1	SW_Unigene14367	+	-	+(Mostly)	768	0.996	3	2	1	0.161023	0.135501	gi|225463119|ref|XP_002265135.1|	PREDICTED: probable F-actin-capping protein subunit beta [Vitis vinifera] >gi|297739352|emb|CBI29342.3| unnamed protein product [Vitis vinifera]	gi|359495176|ref|XM_002265099.2|	PREDICTED: Vitis vinifera probable F-actin-capping protein subunit beta-like (LOC100242539), mRNA	sp|Q9M9G7|CAPZB_ARATH	Probable F-actin-capping protein subunit beta OS=Arabidopsis thaliana GN=At1g71790 PE=2 SV=1	-	-	K10365	vvi:100242539	capping protein (actin filament) muscle Z-line, beta	GO:0009408//response to heat;GO:0051693//actin filament capping	GO:0003779//actin binding	GO:0071203//WASH complex;GO:0008290//F-actin capping protein complex
17	CSE_Unigene19117	SW_Unigene15129	+	-	+(Mostly)	1050	0.994	6	2	4	0.840653	0.878453	gi|359494811|ref|XP_002271020.2|	PREDICTED: uncharacterized protein LOC100260014 [Vitis vinifera] >gi|302144208|emb|CBI23335.3| unnamed protein product [Vitis vinifera]	gi|359494810|ref|XM_002270984.2|	PREDICTED: Vitis vinifera uncharacterized LOC100260014 (LOC100260014), mRNA	sp|Q56XR7|STR4A_ARATH	Rhodanese-like domain-containing protein 4A, chloroplastic OS=Arabidopsis thaliana GN=STR4A PE=2 SV=1	-	-	-	-	-	-	-	GO:0009535//chloroplast thylakoid membrane
18	CSE_Unigene18740	SW_Unigene19709	+	-	+(Mostly)	4098	0.995	21	11.8693	9.13068	0.244539	0.0012359	gi|359495006|ref|XP_002266009.2|	PREDICTED: F-box protein At3g54460-like [Vitis vinifera]	gi|359495005|ref|XM_002265973.2|	PREDICTED: Vitis vinifera F-box protein At3g54460-like (LOC100254946), mRNA	sp|Q9M1I1|FB304_ARATH	F-box protein At3g54460 OS=Arabidopsis thaliana GN=At3g54460 PE=2 SV=1	COG0553	Superfamily II DNA/RNA helicases, SNF2 family	K15505	bdi:100838307	DNA repair protein RAD5 [EC:3.6.4.-]	-	GO:0004386//helicase activity;GO:0003677//DNA binding;GO:0005524//ATP binding;GO:0008270//zinc ion binding	GO:0009506//plasmodesma;GO:0005634//nucleus
19	CSE_Unigene15376	SW_CL1978_Contig1	+	-	+(Mostly)	999	0.984	13	7	6	0.351158	0.0547639	gi|359473791|ref|XP_002266409.2|	PREDICTED: uncharacterized protein LOC100255676 [Vitis vinifera]	gi|359473790|ref|XM_002266373.2|	PREDICTED: Vitis vinifera uncharacterized LOC100255676 (LOC100255676), mRNA	-	-	COG3618	Predicted metal-dependent hydrolase of the TIM-barrel fold	K07046	vvi:100255676		GO:0008152//metabolic process	GO:0016787//hydrolase activity	GO:0009507//chloroplast
20	CSE_Unigene15459	SW_CL7755_Contig3	+	-	+(Mostly)	2088	0.997	6	3	3	0.328649	0.165624	gi|359473699|ref|XP_002266890.2|	PREDICTED: neurolysin, mitochondrial-like [Vitis vinifera]	gi|359473698|ref|XM_002266854.2|	PREDICTED: Vitis vinifera neurolysin, mitochondrial-like (LOC100251085), mRNA	-	-	COG0339	Zn-dependent oligopeptidases	K01392	vvi:100251085	thimet oligopeptidase [EC:3.4.24.15]	GO:0045787//positive regulation of cell cycle;GO:0031507//heterochromatin assembly;GO:0019243//methylglyoxal catabolic process to D-lactate;GO:0009909//regulation of flower development;GO:0048449//floral organ formation;GO:0007059//chromosome segregation;GO:0006508//proteolysis;GO:0042138//meiotic DNA double-strand break formation;GO:0016570//histone modification;GO:0007129//synapsis;GO:0007131//…	GO:0046872//metal ion binding;GO:0004222//metalloendopeptidase activity	GO:0005739//mitochondrion
21	CSE_Unigene780	SW_CL1804_Contig2	+	-	+(Mostly)	1743	0.982	25	8.51749	16.4825	0.755914	0.50191	gi|297738026|emb|CBI27227.3|	unnamed protein product [Vitis vinifera]	gi|359472773|ref|XM_002275607.2|	PREDICTED: Vitis vinifera DNA polymerase eta-like (LOC100266192), mRNA	sp|A3EWL3|REV1_ARATH	DNA repair protein REV1 OS=Arabidopsis thaliana GN=REV1 PE=2 SV=1	COG0389	Nucleotidyltransferase/DNA polymerase involved in DNA repair	K03509	vvi:100266192	DNA polymerase eta subunit [EC:2.7.7.7]	GO:0010224//response to UV-B;GO:0042276//error-prone translesion synthesis;GO:0042732//D-xylose metabolic process;GO:0006261//DNA-dependent DNA replication	GO:0003684//damaged DNA binding;GO:0003887//DNA-directed DNA polymerase activity;GO:0005515//protein binding	-
22	CSE_Unigene14586	SW_Unigene22065	+	-	+(Mostly)	564	0.989	6	2	4	0.648901	0.45601	gi|225425642|ref|XP_002272064.1|	PREDICTED: oxygen-evolving enhancer protein 3-2, chloroplastic [Vitis vinifera] >gi|296086349|emb|CBI31938.3| unnamed protein product [Vitis vinifera]	gi|349718399|emb|FQ381404.1|	Vitis vinifera clone SS0ABP1YL18	sp|Q9XI73|PQL1_ARATH	PsbQ-like protein 1, chloroplastic OS=Arabidopsis thaliana GN=PQL1 PE=1 SV=1	-	-	K08901	vvi:100243071	photosystem II oxygen-evolving enhancer protein 3	GO:0009767//photosynthetic electron transport chain;GO:0006098//pentose-phosphate shunt;GO:0000023//maltose metabolic process;GO:0019252//starch biosynthetic process;GO:0043085//positive regulation of catalytic activity	GO:0005509//calcium ion binding;GO:0045156//electron transporter, transferring electrons within the cyclic electron transport pathway of photosynthesis activity	GO:0030095//chloroplast photosystem II;GO:0019898//extrinsic to membrane;GO:0009344//nitrite reductase complex [NAD(P)H];GO:0009654//oxygen evolving complex;GO:0009543//chloroplast thylakoid lumen
23	CSE_Unigene15112	SW_Unigene11070	+	-	+(Mostly)	678	0.993	5	2	3	0.481223	0.352766	gi|225425744|ref|XP_002276441.1|	PREDICTED: probable peptidyl-prolyl cis-trans isomerase isoform 1 [Vitis vinifera] >gi|359473259|ref|XP_003631278.1| PREDICTED: probable peptidyl-prolyl cis-trans isomerase isoform 2 [Vitis vinifera] >gi|296086396|emb|CBI31985.3| unnamed protein product [Vitis vinifera]	gi|359473258|ref|XM_003631230.1|	PREDICTED: Vitis vinifera probable peptidyl-prolyl cis-trans isomerase-like, transcript variant 2 (LOC100244863), mRNA	sp|Q9FJX0|PPIL2_ARATH	Peptidyl-prolyl cis-trans isomerase-like 2 OS=Arabidopsis thaliana GN=PUB49 PE=2 SV=1	COG0652	Peptidyl-prolyl cis-trans isomerase (rotamase) - cyclophilin family	K12736	olu:OSTLU_40159	peptidylprolyl isomerase domain and WD repeat-containing protein 1 [EC:5.2.1.8]	GO:0006457//protein folding;GO:0000413//protein peptidyl-prolyl isomerization	GO:0003755//peptidyl-prolyl cis-trans isomerase activity	GO:0005768//endosome;GO:0005794//Golgi apparatus;GO:0016023//cytoplasmic membrane-bounded vesicle;GO:0005576//extracellular region;GO:0005802//trans-Golgi network
24	CSE_Unigene8453	SW_CL2252_Contig2	+	-	+(Mostly)	1407	0.994	9	4	5	0.53026	0.423705	gi|297742086|emb|CBI33873.3|	unnamed protein product [Vitis vinifera]	gi|359474471|ref|XM_002277827.2|	PREDICTED: Vitis vinifera uncharacterized LOC100253932 (LOC100253932), mRNA	sp|B3H6K1|Y4791_ARATH	Uncharacterized protein At4g17910 OS=Arabidopsis thaliana GN=At4g17910 PE=2 SV=2	COG5062	Uncharacterized membrane protein	K05283	vvi:100253932	phosphatidylinositol glycan, class W [EC:2.3.-.-]	GO:0006506//GPI anchor biosynthetic process	GO:0046872//metal ion binding;GO:0016746//transferase activity, transferring acyl groups	GO:0005739//mitochondrion;GO:0016021//integral to membrane;GO:0005789//endoplasmic reticulum membrane
25	CSE_CL6502_Contig1	SW_Unigene6814	+	-	+(Mostly)	972	0.992	8	7	1	0.0470315	0.000356289	gi|147790324|emb|CAN61200.1|	hypothetical protein VITISV_003214 [Vitis vinifera]	gi|359474078|ref|XM_002270924.2|	PREDICTED: Vitis vinifera nucleoporin SEH1-like (LOC100263869), mRNA	-	-	-	-	K14299	rcu:RCOM_1691290	nucleoporin SEH1	GO:0043161//proteasomal ubiquitin-dependent protein catabolic process;GO:0043248//proteasome assembly;GO:0051788//response to misfolded protein;GO:0006626//protein targeting to mitochondrion;GO:0006635//fatty acid beta-oxidation	GO:0005515//protein binding;GO:0000166//nucleotide binding	GO:0005834//heterotrimeric G-protein complex;GO:0005635//nuclear envelope;GO:0005737//cytoplasm
26	CSE_CL4815_Contig1	SW_CL4727_Contig2	+	-	+(Mostly)	1512	0.996	6	4	2	0.174777	0.0426981	gi|225426218|ref|XP_002263667.1|	PREDICTED: methyltransferase-like protein 17, mitochondrial [Vitis vinifera] >gi|297742403|emb|CBI34552.3| unnamed protein product [Vitis vinifera]	gi|225426217|ref|XM_002263631.1|	PREDICTED: Vitis vinifera methyltransferase-like protein 17, mitochondrial (LOC100251375), mRNA	-	-	COG5459	Predicted rRNA methylase	-	-	-	GO:0032259//methylation;GO:0006412//translation	GO:0005507//copper ion binding;GO:0008168//methyltransferase activity	GO:0005739//mitochondrion
27	CSE_CL4724_Contig2	SW_CL498_Contig1	+	-	+(Mostly)	588	0.985	9	1.01668	7.98332	3.32632	0.252003	gi|297742527|emb|CBI34676.3|	unnamed protein product [Vitis vinifera]	gi|147861042|emb|AM449398.2|	Vitis vinifera contig VV78X138743.6, whole genome shotgun sequence	-	-	COG0816	Predicted endonuclease involved in recombination (possible Holliday junction resolvase in Mycoplasmas and B. subtilis)	K07447	vvi:100266792	putative holliday junction resolvase [EC:3.1.-.-]	GO:0006310//DNA recombination;GO:0006281//DNA repair	GO:0016788//hydrolase activity, acting on ester bonds;GO:0003676//nucleic acid binding	GO:0005737//cytoplasm
28	CSE_CL4873_Contig2	SW_Unigene22517	+	-	+(Mostly)	636	0.995	3	3	NA	0	NA	gi|225427470|ref|XP_002270678.1|	PREDICTED: single-stranded DNA-binding protein, mitochondrial [Vitis vinifera] >gi|296088446|emb|CBI37437.3| unnamed protein product [Vitis vinifera]	gi|225427469|ref|XM_002270642.1|	PREDICTED: Vitis vinifera single-stranded DNA-binding protein, mitochondrial-like (LOC100258550), mRNA	sp|Q84J78|SSBP_ARATH	Single-stranded DNA-binding protein, mitochondrial OS=Arabidopsis thaliana GN=At4g11060 PE=2 SV=1	COG0629	Single-stranded DNA-binding protein	K03111	vvi:100258550	single-strand DNA-binding protein	GO:0006260//DNA replication	GO:0003697//single-stranded DNA binding	GO:0005739//mitochondrion
29	CSE_Unigene19206	SW_Unigene13074	+	-	+(Mostly)	2520	0.994	16	10	6	0.231545	0.00409333	gi|359474753|ref|XP_002269504.2|	PREDICTED: AP-4 complex subunit epsilon-like [Vitis vinifera]	gi|359474752|ref|XM_002269468.2|	PREDICTED: Vitis vinifera AP-4 complex subunit epsilon-like (LOC100249377), mRNA	sp|Q8L7A9|AP4E_ARATH	AP-4 complex subunit epsilon OS=Arabidopsis thaliana GN=At1g31730 PE=1 SV=1	-	-	K12400	pop:POPTR_596858	AP-4 complex subunit epsilon-1	GO:0006007//glucose catabolic process;GO:0016192//vesicle-mediated transport;GO:0006886//intracellular protein transport;GO:0006487//protein N-linked glycosylation	GO:0030276//clathrin binding	GO:0005829//cytosol;GO:0009506//plasmodesma;GO:0030117//membrane coat;GO:0005886//plasma membrane
30	CSE_Unigene986	SW_Unigene21579	+	-	+(Mostly)	1014	0.994	6	4	2	0.187811	0.0511949	gi|225462874|ref|XP_002272947.1|	PREDICTED: probable nitronate monooxygenase [Vitis vinifera] >gi|296087479|emb|CBI34068.3| unnamed protein product [Vitis vinifera]	gi|349713617|emb|FQ391585.1|	Vitis vinifera clone SS0AP1YF09	-	-	COG2070	Dioxygenases related to 2-nitropropane dioxygenase	-	-	-	GO:0046482//para-aminobenzoic acid metabolic process;GO:0046686//response to cadmium ion;GO:0009610//response to symbiotic fungus;GO:0055114//oxidation-reduction process	GO:0003938//IMP dehydrogenase activity;GO:0016702//oxidoreductase activity, acting on single donors with incorporation of molecular oxygen, incorporation of two atoms of oxygen;GO:0018580//nitronate monooxygenase activity	GO:0005829//cytosol;GO:0005739//mitochondrion
31	CSE_Unigene394	SW_CL2927_Contig2	+	-	+(Mostly)	636	0.998	1	1	NA	0	NA	gi|225428987|ref|XP_002265287.1|	PREDICTED: ribosomal RNA large subunit methyltransferase N [Vitis vinifera] >gi|147817733|emb|CAN60150.1| hypothetical protein VITISV_044331 [Vitis vinifera] >gi|296083052|emb|CBI22456.3| unnamed protein product [Vitis vinifera]	gi|225428986|ref|XM_002265251.1|	PREDICTED: Vitis vinifera ribosomal RNA large subunit methyltransferase N-like (LOC100259962), mRNA	-	-	COG0820	Predicted Fe-S-cluster redox enzyme	K06941	osa:4326401	23S rRNA (adenine2503-C2)-methyltransferase [EC:2.1.1.192]	GO:0000278//mitotic cell cycle;GO:0001510//RNA methylation;GO:0006364//rRNA processing	GO:0051536//iron-sulfur cluster binding;GO:0008173//RNA methyltransferase activity	GO:0005737//cytoplasm
32	CSE_Unigene551	SW_Unigene16483	+	-	+(Mostly)	756	0.991	7	4	3	0.295461	0.106173	gi|225431171|ref|XP_002269473.1|	PREDICTED: peptide methionine sulfoxide reductase A5 [Vitis vinifera] >gi|297735029|emb|CBI17391.3| unnamed protein product [Vitis vinifera]	gi|359476603|ref|XM_002269437.2|	PREDICTED: Vitis vinifera peptide methionine sulfoxide reductase A5-like (LOC100241959), mRNA	sp|Q9SL43|MSRA5_ARATH	Peptide methionine sulfoxide reductase A5 OS=Arabidopsis thaliana GN=MSRA5 PE=2 SV=1	COG0225	Peptide methionine sulfoxide reductase	K07304	vvi:100241959	peptide-methionine (S)-S-oxide reductase [EC:1.8.4.11]	GO:0006464//cellular protein modification process;GO:0055114//oxidation-reduction process	GO:0008113//peptide-methionine-(S)-S-oxide reductase activity	GO:0016023//cytoplasmic membrane-bounded vesicle;GO:0009507//chloroplast
33	CSE_Unigene13551	SW_Unigene7531	+	-	+(Mostly)	1095	0.995	6	5	1	0.0682752	0.00485369	gi|359476685|ref|XP_002266355.2|	PREDICTED: uncharacterized hydrolase yugF-like [Vitis vinifera] >gi|297735133|emb|CBI17495.3| unnamed protein product [Vitis vinifera]	gi|359476684|ref|XM_002266319.2|	PREDICTED: Vitis vinifera uncharacterized LOC100261647 (LOC100261647), mRNA	-	-	COG0596	Predicted hydrolases or acyltransferases (alpha/beta hydrolase superfamily)	K13535	cre:CHLREDRAFT_121979	cardiolipin-specific phospholipase [EC:3.1.1.-]	GO:0019252//starch biosynthetic process;GO:0043085//positive regulation of catalytic activity;GO:0000023//maltose metabolic process	GO:0080030//methyl indole-3-acetate esterase activity;GO:0004091//carboxylesterase activity;GO:0050253//retinyl-palmitate esterase activity;GO:0080031//methyl salicylate esterase activity;GO:0080032//methyl jasmonate esterase activity	GO:0009941//chloroplast envelope
34	CSE_Unigene11709	SW_CL6659_Contig1	+	-	+(Mostly)	1764	0.993	12	9	3	0.111326	0.000414244	gi|359476610|ref|XP_003631864.1|	PREDICTED: riboflavin biosynthesis protein RibD-like [Vitis vinifera] >gi|297735254|emb|CBI17616.3| unnamed protein product [Vitis vinifera]	gi|359476609|ref|XM_003631816.1|	PREDICTED: Vitis vinifera riboflavin biosynthesis protein RibD-like (LOC100264997), mRNA	-	-	COG1985	Pyrimidine reductase, riboflavin biosynthesis	K11752	ppp:PHYPADRAFT_129273	diaminohydroxyphosphoribosylaminopyrimidine deaminase / 5-amino-6-(5-phosphoribosylamino)uracil reductase [EC:3.5.4.26 1.1.1.193]	GO:0009231//riboflavin biosynthetic process;GO:0010119//regulation of stomatal movement;GO:0046443//FAD metabolic process;GO:0009414//response to water deprivation;GO:0019252//starch biosynthetic process;GO:0043622//cortical microtubule organization;GO:0010468//regulation of gene expression;GO:0042742//defense response to bacterium;GO:0000188//inactivation of MAPK activity;GO:0009644//response to…	GO:0008138//protein tyrosine/serine/threonine phosphatase activity;GO:0016772//transferase activity, transferring phosphorus-containing groups;GO:0005515//protein binding;GO:0008270//zinc ion binding;GO:0033549//MAP kinase phosphatase activity;GO:0004725//protein tyrosine phosphatase activity;GO:0008835//diaminohydroxyphosphoribosylaminopyrimidine deaminase activity;GO:0050661//NADP binding;GO:00…	GO:0005829//cytosol;GO:0009570//chloroplast stroma;GO:0005634//nucleus
35	CSE_Unigene5024	SW_Unigene14982	+	-	+(Mostly)	570	0.982	10	7	3	0.0958758	0.000527171	gi|225430602|ref|XP_002265803.1|	PREDICTED: uncharacterized protein C11orf73 homolog [Vitis vinifera] >gi|147800174|emb|CAN77663.1| hypothetical protein VITISV_027383 [Vitis vinifera] >gi|239056165|emb|CAQ58596.1| Unknown gene [Vitis vinifera] >gi|296085140|emb|CBI28635.3| unnamed protein product [Vitis vinifera]	gi|359476521|ref|XM_002265767.2|	PREDICTED: Vitis vinifera uncharacterized LOC100257053 (LOC100257053), mRNA	sp|Q9LK03|PERK2_ARATH	Proline-rich receptor-like protein kinase PERK2 OS=Arabidopsis thaliana GN=PERK2 PE=2 SV=3	-	-	K01783	ota:Ot06g01930	ribulose-phosphate 3-epimerase [EC:5.1.3.1]	GO:0006457//protein folding;GO:0009644//response to high light intensity;GO:0034976//response to endoplasmic reticulum stress;GO:0042542//response to hydrogen peroxide;GO:0009408//response to heat	-	GO:0005829//cytosol
36	CSE_CL291_Contig3	SW_CL4212_Contig2	+	-	+(Mostly)	531	0.994	3	3	NA	0	NA	gi|225466251|ref|XP_002270403.1|	PREDICTED: armadillo repeat-containing protein 7 [Vitis vinifera] >gi|297738150|emb|CBI27351.3| unnamed protein product [Vitis vinifera]	gi|359476478|ref|XM_002270367.2|	PREDICTED: Vitis vinifera armadillo repeat-containing protein 7-like (LOC100266771), mRNA	-	-	-	-	-	-	-	-	-	GO:0005634//nucleus
37	CSE_Unigene12462	SW_Unigene21738	+	-	+(Mostly)	498	0.992	4	1	3	1.07201	0.701923	gi|225429434|ref|XP_002276450.1|	PREDICTED: UPF0587 protein C1orf123 homolog [Vitis vinifera] >gi|296081606|emb|CBI20611.3| unnamed protein product [Vitis vinifera]	gi|359476211|ref|XM_002276414.2|	PREDICTED: Vitis vinifera uncharacterized LOC100254402 (LOC100254402), mRNA	-	-	-	-	-	-	-	-	-	-
38	CSE_CL4886_Contig1	SW_CL664_Contig2	+	-	+(Mostly)	645	0.989	7	NA	7	NA	NA	gi|225429654|ref|XP_002281227.1|	PREDICTED: uncharacterized protein LOC100257708 [Vitis vinifera] >gi|296081705|emb|CBI20710.3| unnamed protein product [Vitis vinifera]	gi|359476272|ref|XM_002281191.2|	PREDICTED: Vitis vinifera uncharacterized LOC100257708 (LOC100257708), mRNA	-	-	COG0484	DnaJ-class molecular chaperone with C-terminal Zn finger domain	K03686	smo:SELMODRAFT_167519	molecular chaperone DnaJ	-	-	GO:0009535//chloroplast thylakoid membrane
39	CSE_CL7204_Contig1	SW_CL5697_Contig2	+	-	+(Mostly)	777	0.988	9	4	5	0.481853	0.224397	gi|359476346|ref|XP_002281160.2|	PREDICTED: thioredoxin-related transmembrane protein 2 [Vitis vinifera]	gi|359476345|ref|XM_002281124.2|	PREDICTED: Vitis vinifera thioredoxin-related transmembrane protein 2-like (LOC100254144), mRNA	-	-	-	-	-	-	-	-	-	-
40	CSE_Unigene16390	SW_Unigene21983	+	-	+(Mostly)	810	0.993	6	2	4	0.657998	0.461477	gi|225432108|ref|XP_002262955.1|	PREDICTED: uncharacterized protein LOC100251180 [Vitis vinifera]	gi|359477439|ref|XM_002262919.2|	PREDICTED: Vitis vinifera uncharacterized LOC100251180 (LOC100251180), mRNA	-	-	-	-	-	-	-	-	-	-
41	CSE_Unigene22992	SW_CL7949_Contig2	+	-	+(Mostly)	642	0.995	3	1	2	0.678332	0.568515	gi|225432460|ref|XP_002278797.1|	PREDICTED: uncharacterized protein LOC100252797 [Vitis vinifera] >gi|147777374|emb|CAN73835.1| hypothetical protein VITISV_043470 [Vitis vinifera] >gi|297736948|emb|CBI26149.3| unnamed protein product [Vitis vinifera]	gi|349703431|emb|FQ383394.1|	Vitis vinifera clone SS0ABG20YI17	-	-	COG0566	rRNA methylases	K15507	olu:OSTLU_27615	21S rRNA (GM2251-2'-O)-methyltransferase [EC:2.1.1.-]	GO:0001510//RNA methylation;GO:0006396//RNA processing;GO:0016558//protein import into peroxisome matrix;GO:0006635//fatty acid beta-oxidation	GO:0008173//RNA methyltransferase activity;GO:0003723//RNA binding	GO:0009536//plastid
42	CSE_Unigene1687	SW_CL7255_Contig2	+	-	+(Mostly)	2148	0.996	8	2	6	0.871313	0.870518	gi|225432660|ref|XP_002282406.1|	PREDICTED: uncharacterized protein LOC100259756 isoform 1 [Vitis vinifera] >gi|297737050|emb|CBI26251.3| unnamed protein product [Vitis vinifera]	gi|359477520|ref|XM_002282370.2|	PREDICTED: Vitis vinifera uncharacterized LOC100259756, transcript variant 1 (LOC100259756), mRNA	-	-	-	-	K08902	zma:100282043	photosystem II Psb27 protein	GO:0006098//pentose-phosphate shunt;GO:0010207//photosystem II assembly	-	GO:0009543//chloroplast thylakoid lumen
43	CSE_Unigene14298	SW_Unigene11156	+	-	+(Mostly)	654	0.992	5	NA	5	NA	NA	gi|225432876|ref|XP_002280020.1|	PREDICTED: uncharacterized protein LOC100252711 [Vitis vinifera] >gi|297737148|emb|CBI26349.3| unnamed protein product [Vitis vinifera]	gi|349720399|emb|FQ381646.1|	Vitis vinifera clone SS0ABP1YA14	-	-	-	-	-	-	-	GO:0006979//response to oxidative stress;GO:0019288//isopentenyl diphosphate biosynthetic process, mevalonate-independent pathway;GO:0010027//thylakoid membrane organization;GO:0030003//cellular cation homeostasis;GO:0070838//divalent metal ion transport	-	GO:0009535//chloroplast thylakoid membrane
44	CSE_Unigene11575	SW_CL2138_Contig1	+	-	+(Mostly)	708	0.984	11	7	4	0.191566	0.00834471	gi|225433598|ref|XP_002273067.1|	PREDICTED: uncharacterized protein LOC100258998 [Vitis vinifera] >gi|298205160|emb|CBI17219.3| unnamed protein product [Vitis vinifera]	gi|359477910|ref|XM_002273031.2|	PREDICTED: Vitis vinifera uncharacterized LOC100258998 (LOC100258998), mRNA	-	-	-	-	-	-	-	GO:0006261//DNA-dependent DNA replication;GO:0006312//mitotic recombination;GO:0009560//embryo sac egg cell differentiation	-	GO:0005737//cytoplasm
45	CSE_Unigene14676	SW_Unigene22490	+	-	+(Mostly)	1098	0.991	10	3	7	0.953327	0.968085	gi|225433694|ref|XP_002267391.1|	PREDICTED: 15-cis-zeta-carotene isomerase, chloroplastic-like [Vitis vinifera]	gi|349720143|emb|FQ392871.1|	Vitis vinifera clone SS0AFA3YN23	sp|Q9SAC0|ZCIS_ARATH	15-cis-zeta-carotene isomerase, chloroplastic OS=Arabidopsis thaliana GN=Z-ISO PE=1 SV=1	COG4094	Predicted membrane protein	K15744	vvi:100258367	zeta-carotene isomerase [EC:5.2.1.12]	GO:0016120//carotene biosynthetic process	GO:0090471//9,15,9'-tri-cis-zeta-carotene isomerase activity	GO:0031969//chloroplast membrane;GO:0016021//integral to membrane
46	CSE_Unigene13572	SW_Unigene10978	+	-	+(Mostly)	792	0.98	16	6	10	0.740142	0.58552	gi|296089632|emb|CBI39451.3|	unnamed protein product [Vitis vinifera]	gi|225433710|ref|XR_077468.1|	PREDICTED: Vitis vinifera uncharacterized LOC100251412 (LOC100251412), miscRNA	-	-	-	-	-	-	-	-	GO:0004386//helicase activity;GO:1901363;GO:0097159//organic cyclic compound binding	GO:0005634//nucleus;GO:0009536//plastid
47	CSE_CL993_Contig1	SW_Unigene22575	+	-	+(Mostly)	888	0.978	11	5	6	0.369627	0.0949751	gi|225432037|ref|XP_002273724.1|	PREDICTED: uncharacterized protein LOC100243195 [Vitis vinifera] >gi|296083213|emb|CBI22849.3| unnamed protein product [Vitis vinifera]	gi|225432036|ref|XM_002273688.1|	PREDICTED: Vitis vinifera uncharacterized LOC100243195 (LOC100243195), mRNA	-	-	COG0360	Ribosomal protein S6	-	-	-	GO:0031348//negative regulation of defense response;GO:0006346//methylation-dependent chromatin silencing;GO:0031048//chromatin silencing by small RNA;GO:0016246//RNA interference;GO:0006312//mitotic recombination;GO:0006261//DNA-dependent DNA replication;GO:0009793//embryo development ending in seed dormancy;GO:0051567//histone H3-K9 methylation;GO:0006412//translation;GO:0048449//floral organ f…	GO:0003677//DNA binding;GO:0003735//structural constituent of ribosome;GO:0016887//ATPase activity;GO:0005524//ATP binding;GO:0019843//rRNA binding	GO:0005840//ribosome;GO:0005663//DNA replication factor C complex;GO:0005634//nucleus
48	CSE_Unigene14446	SW_Unigene12554	+	-	+(Mostly)	669	0.987	9	3	6	0.931979	0.968737	gi|359477222|ref|XP_002277268.2|	PREDICTED: seed maturation protein PM36 [Vitis vinifera]	gi|359477221|ref|XM_002277232.2|	PREDICTED: Vitis vinifera seed maturation protein PM36-like (LOC100265331), mRNA	sp|Q9SWB6|PM36_SOYBN	Seed maturation protein PM36 OS=Glycine max GN=PM36 PE=2 SV=1	COG0819	Putative transcription activator	-	-	-	-	-	-
49	CSE_Unigene991	SW_Unigene18440	+	-	+(Mostly)	1506	0.99	12	5	7	0.519635	0.304047	gi|359478316|ref|XP_002273627.2|	PREDICTED: diphthamide biosynthesis protein 2-like [Vitis vinifera] >gi|296084273|emb|CBI24661.3| unnamed protein product [Vitis vinifera]	gi|359478315|ref|XM_002273591.2|	PREDICTED: Vitis vinifera diphthamide biosynthesis protein 2-like (LOC100262956), mRNA	-	-	COG1736	Diphthamide synthase subunit DPH2	-	-	-	GO:0017183//peptidyl-diphthamide biosynthetic process from peptidyl-histidine;GO:0015824//proline transport	-	GO:0005737//cytoplasm
50	CSE_Unigene10610	SW_CL6350_Contig1	+	-	+(Mostly)	615	0.984	10	5	5	0.26973	0.0430652	gi|296084277|emb|CBI24665.3|	unnamed protein product [Vitis vinifera]	gi|359478319|ref|XM_002273624.2|	PREDICTED: Vitis vinifera trigger factor-like (LOC100257831), mRNA	-	-	COG0544	FKBP-type peptidyl-prolyl cis-trans isomerase (trigger factor)	-	-	-	GO:0006457//protein folding;GO:0016226//iron-sulfur cluster assembly;GO:0006364//rRNA processing;GO:0019288//isopentenyl diphosphate biosynthetic process, mevalonate-independent pathway;GO:0009658//chloroplast organization;GO:0006399//tRNA metabolic process;GO:0010207//photosystem II assembly;GO:0045036//protein targeting to chloroplast;GO:0009073//aromatic amino acid family biosynthetic process	-	GO:0009570//chloroplast stroma
51	CSE_Unigene15667	SW_Unigene15446	+	-	+(Mostly)	1536	0.995	7	5	2	0.122231	0.00972869	gi|225434512|ref|XP_002278434.1|	PREDICTED: pentatricopeptide repeat-containing protein At2g30100, chloroplastic [Vitis vinifera]	gi|225434511|ref|XM_002278398.1|	PREDICTED: Vitis vinifera pentatricopeptide repeat-containing protein At2g30100, chloroplastic-like (LOC100251804), mRNA	sp|Q0WNN7|PP176_ARATH	Pentatricopeptide repeat-containing protein At2g30100, chloroplastic OS=Arabidopsis thaliana GN=At2g30100 PE=2 SV=2	-	-	K11323	vcn:VOLCADRAFT_121342	histone arginine demethylase JMJD6 [EC:1.14.11.-]	-	-	GO:0009507//chloroplast
52	CSE_CL7056_Contig2	SW_CL3924_Contig2	+	-	+(Mostly)	1683	0.992	13	7	6	0.215903	0.00747611	gi|225434600|ref|XP_002279214.1|	PREDICTED: protein DAMAGED DNA-BINDING 2 [Vitis vinifera] >gi|147833025|emb|CAN61895.1| hypothetical protein VITISV_028792 [Vitis vinifera] >gi|297745903|emb|CBI15959.3| unnamed protein product [Vitis vinifera]	gi|359478842|ref|XM_002279178.2|	PREDICTED: Vitis vinifera protein DAMAGED DNA-BINDING 2-like (LOC100250121), mRNA	sp|Q6NQ88|DDB2_ARATH	Protein DAMAGED DNA-BINDING 2 OS=Arabidopsis thaliana GN=DDB2 PE=1 SV=1	COG2319	FOG: WD40 repeat	K10140	vvi:100250121	DNA damage-binding protein 2	GO:0010224//response to UV-B;GO:0006281//DNA repair	GO:0003677//DNA binding;GO:0008270//zinc ion binding;GO:0000166//nucleotide binding	GO:0005634//nucleus;GO:0080008//Cul4-RING ubiquitin ligase complex
53	CSE_CL6017_Contig2	SW_Unigene23060	+	-	+(Mostly)	2052	0.988	25	15	10	0.255497	0.00075198	gi|297746229|emb|CBI16285.3|	unnamed protein product [Vitis vinifera]	gi|225435258|ref|XM_002282156.1|	PREDICTED: Vitis vinifera uncharacterized LOC100256992 (LOC100256992), mRNA	-	-	-	-	-	-	-	-	-	GO:0005634//nucleus;GO:0016021//integral to membrane
54	CSE_Unigene13486	SW_Unigene22280	+	-	+(Mostly)	771	0.992	6	3	3	0.383294	0.215222	gi|225435289|ref|XP_002285095.1|	PREDICTED: pyridoxal biosynthesis protein PDX2-like [Vitis vinifera]	gi|349713708|emb|FQ391676.1|	Vitis vinifera clone SS0AP1YA06	sp|Q8LAD0|PDX2_ARATH	Pyridoxal biosynthesis protein PDX2 OS=Arabidopsis thaliana GN=PDX2 PE=1 SV=1	COG0311	Predicted glutamine amidotransferase involved in pyridoxine biosynthesis	K08681	vvi:100267348	glutamine amidotransferase [EC:2.6.-.-]	GO:0008615//pyridoxine biosynthetic process;GO:0006541//glutamine metabolic process;GO:0009793//embryo development ending in seed dormancy	GO:0004359//glutaminase activity;GO:0016740//transferase activity;GO:0046982//protein heterodimerization activity	GO:0005829//cytosol
55	CSE_Unigene15056	SW_Unigene23001	+	-	+(Mostly)	2523	0.992	20	10	10	0.268717	0.00414313	gi|359478697|ref|XP_002282314.2|	PREDICTED: zinc finger CCCH domain-containing protein 24-like [Vitis vinifera]	gi|359478696|ref|XM_002282278.2|	PREDICTED: Vitis vinifera zinc finger CCCH domain-containing protein 24-like (LOC100262197), mRNA	sp|Q8L7S3|C3H24_ARATH	Zinc finger CCCH domain-containing protein 24 OS=Arabidopsis thaliana GN=At2g28450 PE=2 SV=1	COG2265	SAM-dependent methyltransferases related to tRNA (uracil-5-)-methyltransferase	K15332	vvi:100262197	tRNA (uracil-5-)-methyltransferase	GO:0009560//embryo sac egg cell differentiation;GO:0016070//RNA metabolic process;GO:0000741//karyogamy;GO:0006606//protein import into nucleus;GO:0032259//methylation	GO:0097159//organic cyclic compound binding;GO:1901363;GO:0008168//methyltransferase activity	-
56	CSE_CL4307_Contig2	SW_CL4874_Contig2	+	-	+(Mostly)	807	0.989	9	4	5	0.41766	0.168081	gi|225435305|ref|XP_002285123.1|	PREDICTED: yrdC domain-containing protein, mitochondrial [Vitis vinifera] >gi|297746251|emb|CBI16307.3| unnamed protein product [Vitis vinifera]	gi|225435304|ref|XM_002285087.1|	PREDICTED: Vitis vinifera yrdC domain-containing protein, mitochondrial-like (LOC100251962), mRNA	-	-	COG0009	Putative translation factor (SUA5)	K07566	vcn:VOLCADRAFT_56845	tRNA threonylcarbamoyladenosine biosynthesis protein	-	GO:0003725//double-stranded RNA binding	GO:0005739//mitochondrion
57	CSE_Unigene9413	SW_Unigene22796	+	-	+(Mostly)	579	0.997	2	2	NA	0	NA	gi|225435973|ref|XP_002271255.1|	PREDICTED: RNA polymerase II subunit A C-terminal domain phosphatase SSU72 [Vitis vinifera] >gi|296083946|emb|CBI24334.3| unnamed protein product [Vitis vinifera]	gi|225435972|ref|XM_002271219.1|	PREDICTED: Vitis vinifera RNA polymerase II subunit A C-terminal domain phosphatase SSU72-like (LOC100256509), mRNA	-	-	COG5211	RNA polymerase II-interacting protein involved in transcription start site selection	K15544	vvi:100256509	RNA polymerase II subunit A C-terminal domain phosphatase SSU72 [EC:3.1.3.16]	GO:0006397//mRNA processing;GO:0006470//protein dephosphorylation	GO:0004721//phosphoprotein phosphatase activity	GO:0009507//chloroplast;GO:0005634//nucleus;GO:0005739//mitochondrion
58	CSE_Unigene11863	SW_Unigene22803	+	-	+(Mostly)	1344	0.994	8	6	2	0.128059	0.00761144	gi|225438942|ref|XP_002279446.1|	PREDICTED: major facilitator superfamily domain-containing protein 5 [Vitis vinifera] >gi|296087347|emb|CBI33721.3| unnamed protein product [Vitis vinifera]	gi|225438941|ref|XM_002279410.1|	PREDICTED: Vitis vinifera major facilitator superfamily domain-containing protein 5-like (LOC100245788), mRNA	-	-	-	-	-	-	-	-	-	GO:0016020//membrane
59	CSE_Unigene17726	SW_Unigene5538	+	-	+(Mostly)	1287	0.991	11	7	4	0.217237	0.00244036	gi|359479631|ref|XP_003632308.1|	PREDICTED: tRNA (guanine-N(7)-)-methyltransferase subunit WDR4-like [Vitis vinifera] >gi|296085216|emb|CBI28711.3| unnamed protein product [Vitis vinifera]	gi|359479630|ref|XM_003632260.1|	PREDICTED: Vitis vinifera tRNA (guanine-N(7)-)-methyltransferase subunit WDR4-like (LOC100855304), mRNA	sp|Q8H0T9|KTNB1_ARATH	Katanin p80 WD40 repeat-containing subunit B1 homolog OS=Arabidopsis thaliana GN=At5g23430 PE=2 SV=3	COG2319	FOG: WD40 repeat	K15443	vvi:100855304	tRNA (guanine-N(7)-)-methyltransferase subunit TRM82	GO:0006400//tRNA modification;GO:0008618//7-methylguanosine metabolic process;GO:0001510//RNA methylation	GO:0000166//nucleotide binding	GO:0005737//cytoplasm
60	CSE_Unigene13603	SW_Unigene11005	+	-	+(Mostly)	522	0.987	4	2	2	0.323039	0.25018	gi|359479661|ref|XP_003632323.1|	PREDICTED: uncharacterized protein LOC100852813 [Vitis vinifera]	gi|359479660|ref|XM_003632275.1|	PREDICTED: Vitis vinifera uncharacterized LOC100852813 (LOC100852813), mRNA	-	-	-	-	-	-	-	-	-	-
61	CSE_Unigene14477	SW_CL7779_Contig1	+	-	+(Mostly)	951	0.989	10	6	4	0.260325	0.0357897	gi|359479800|ref|XP_002271766.2|	PREDICTED: uncharacterized protein LOC100249345 [Vitis vinifera] >gi|296086712|emb|CBI32347.3| unnamed protein product [Vitis vinifera]	gi|359479799|ref|XM_002271730.2|	PREDICTED: Vitis vinifera uncharacterized LOC100249345 (LOC100249345), mRNA	sp|Q39089|PAC_ARATH	Protein PALE CRESS, chloroplastic OS=Arabidopsis thaliana GN=PAC PE=2 SV=1	-	-	-	-	-	GO:0071482//cellular response to light stimulus;GO:0009965//leaf morphogenesis;GO:0016117//carotenoid biosynthetic process;GO:0009658//chloroplast organization;GO:0010239//chloroplast mRNA processing	-	GO:0009501//amyloplast;GO:0009513//etioplast;GO:0009509//chromoplast;GO:0009537//proplastid;GO:0009507//chloroplast
62	CSE_Unigene12004	SW_Unigene22795	+	-	+(Mostly)	636	0.992	5	3	2	0.238451	0.0178773	gi|225438690|ref|XP_002277554.1|	PREDICTED: eukaryotic initiation factor 4A [Vitis vinifera] >gi|296082429|emb|CBI21434.3| unnamed protein product [Vitis vinifera]	gi|225438689|ref|XM_002277518.1|	PREDICTED: Vitis vinifera eukaryotic initiation factor 4A-like (LOC100244066), mRNA	sp|P41380|IF4A3_NICPL	Eukaryotic initiation factor 4A-3 OS=Nicotiana plumbaginifolia PE=2 SV=1	COG0513	Superfamily II DNA and RNA helicases	K13025	gmx:100795032	ATP-dependent RNA helicase [EC:3.6.4.13]	-	-	GO:0005634//nucleus
63	CSE_CL5675_Contig1	SW_CL8707_Contig2	+	-	+(Mostly)	957	0.989	8	3	5	0.541523	0.311018	gi|147791053|emb|CAN68023.1|	hypothetical protein VITISV_003624 [Vitis vinifera]	gi|147791049|emb|AM462494.2|	Vitis vinifera contig VV78X054501.10, whole genome shotgun sequence	-	-	COG3315	O-Methyltransferase involved in polyketide biosynthesis	-	-	-	GO:0032259//methylation	GO:0008168//methyltransferase activity	-
64	CSE_Unigene13571	SW_Unigene11690	+	-	+(Mostly)	2229	0.997	7	5	2	0.132489	0.012709	gi|225437400|ref|XP_002270318.1|	PREDICTED: gamma-tubulin complex component 4 homolog [Vitis vinifera] >gi|297743902|emb|CBI36872.3| unnamed protein product [Vitis vinifera]	gi|225437399|ref|XM_002270282.1|	PREDICTED: Vitis vinifera gamma-tubulin complex component 4 homolog-like (LOC100248708), mRNA	sp|Q9M350|GCP4_ARATH	Gamma-tubulin complex component 4 homolog OS=Arabidopsis thaliana GN=At3g53760 PE=2 SV=2	-	-	-	-	-	GO:0040007//growth;GO:0009909//regulation of flower development;GO:0048449//floral organ formation;GO:0016570//histone modification;GO:0043622//cortical microtubule organization;GO:0007020//microtubule nucleation	GO:0015631//tubulin binding	GO:0005815//microtubule organizing center;GO:0005739//mitochondrion;GO:0000922//spindle pole;GO:0045298//tubulin complex;GO:0009506//plasmodesma
65	CSE_CL6624_Contig2	SW_CL6664_Contig2	+	-	+(Mostly)	804	0.988	10	5	5	0.372545	0.107246	gi|225438097|ref|XP_002277335.1|	PREDICTED: serine/threonine-protein kinase 19 [Vitis vinifera] >gi|297744163|emb|CBI37133.3| unnamed protein product [Vitis vinifera]	gi|225438096|ref|XM_002277299.1|	PREDICTED: Vitis vinifera serine/threonine-protein kinase 19-like (LOC100260094), mRNA	-	-	-	-	K08880	vvi:100260094	serine/threonine kinase 19 [EC:2.7.11.1]	GO:0016310//phosphorylation	GO:0016301//kinase activity	GO:0005634//nucleus;GO:0009536//plastid
66	CSE_Unigene14080	SW_Unigene15426	+	-	+(Mostly)	1455	0.988	17	9	8	0.284594	0.0103148	gi|297744261|emb|CBI37231.3|	unnamed protein product [Vitis vinifera]	gi|359480081|ref|XM_002267608.2|	PREDICTED: Vitis vinifera uncharacterized LOC100253269 (LOC100253269), mRNA	-	-	-	-	-	-	-	GO:0009658//chloroplast organization;GO:0006098//pentose-phosphate shunt	-	GO:0009507//chloroplast
67	CSE_Unigene15609	SW_Unigene11985	+	-	+(Mostly)	891	0.993	6	4	2	0.196618	0.0573443	gi|225439398|ref|XP_002263823.1|	PREDICTED: monothiol glutaredoxin-S16, chloroplastic [Vitis vinifera] >gi|296083172|emb|CBI22808.3| unnamed protein product [Vitis vinifera]	gi|225439397|ref|XM_002263787.1|	PREDICTED: Vitis vinifera monothiol glutaredoxin-S16, chloroplastic-like (LOC100245544), mRNA	sp|Q8H7F6|GRS16_ARATH	Monothiol glutaredoxin-S16, chloroplastic OS=Arabidopsis thaliana GN=GRXS16 PE=2 SV=2	COG0278	Glutaredoxin-related protein	K07390	smo:SELMODRAFT_107150	monothiol glutaredoxin	GO:0045454//cell redox homeostasis;GO:0048653//anther development;GO:0006812//cation transport	GO:0051536//iron-sulfur cluster binding;GO:0009055//electron carrier activity;GO:0015035//protein disulfide oxidoreductase activity	GO:0009570//chloroplast stroma
68	CSE_CL3584_Contig1	SW_Unigene10801	+	-	+(Mostly)	1215	0.996	5	2	3	0.548409	0.403891	gi|359481109|ref|XP_002267146.2|	PREDICTED: uncharacterized protein At3g58460-like [Vitis vinifera] >gi|296089310|emb|CBI39082.3| unnamed protein product [Vitis vinifera]	gi|359481108|ref|XM_002267110.2|	PREDICTED: Vitis vinifera uncharacterized LOC100258103 (LOC100258103), mRNA	sp|Q8LB17|Y3846_ARATH	Uncharacterized protein At3g58460 OS=Arabidopsis thaliana GN=At3g58460 PE=1 SV=2	COG0705	Uncharacterized membrane protein (homolog of Drosophila rhomboid)	K09651	ppp:PHYPADRAFT_205013	rhomboid domain-containing protein 1 [EC:3.4.21.-]	-	GO:0004252//serine-type endopeptidase activity	GO:0016021//integral to membrane
69	CSE_Unigene13370	SW_CL7049_Contig2	+	-	+(Mostly)	927	0.996	4	3	1	0.110396	0	gi|359481387|ref|XP_002281908.2|	PREDICTED: translin [Vitis vinifera]	gi|359481386|ref|XM_002281872.2|	PREDICTED: Vitis vinifera translin-like (LOC100248220), mRNA	-	-	COG2178	Predicted RNA-binding protein of the translin family	-	-	-	GO:0009220//pyrimidine ribonucleotide biosynthetic process	GO:0043565//sequence-specific DNA binding	GO:0005829//cytosol;GO:0009570//chloroplast stroma;GO:0005634//nucleus
70	CSE_Unigene14510	SW_CL3839_Contig2	+	-	+(Mostly)	660	0.997	2	1	1	0.325362	0.371503	gi|225440059|ref|XP_002282285.1|	PREDICTED: thylakoid lumenal 15.0 kDa protein 2, chloroplastic [Vitis vinifera] >gi|297741641|emb|CBI32773.3| unnamed protein product [Vitis vinifera]	gi|225440058|ref|XM_002282249.1|	PREDICTED: Vitis vinifera thylakoid lumenal 15.0 kDa protein 2, chloroplastic-like (LOC100255100), mRNA	sp|Q9LVV5|TL15B_ARATH	Thylakoid lumenal 15.0 kDa protein 2, chloroplastic OS=Arabidopsis thaliana GN=At5g52970 PE=1 SV=2	-	-	-	-	-	GO:0006098//pentose-phosphate shunt;GO:0009793//embryo development ending in seed dormancy;GO:0019288//isopentenyl diphosphate biosynthetic process, mevalonate-independent pathway;GO:0015995//chlorophyll biosynthetic process;GO:0016226//iron-sulfur cluster assembly;GO:0010228//vegetative to reproductive phase transition of meristem;GO:0006364//rRNA processing;GO:0048481//ovule development;GO:0010…	-	GO:0009543//chloroplast thylakoid lumen
71	CSE_Unigene12823	SW_Unigene17095	+	-	+(Mostly)	2196	0.995	12	9	3	0.0955444	0.000159259	gi|225439600|ref|XP_002265851.1|	PREDICTED: uncharacterized protein LOC100265424 [Vitis vinifera] >gi|297735584|emb|CBI18078.3| unnamed protein product [Vitis vinifera]	gi|225439599|ref|XM_002265815.1|	PREDICTED: Vitis vinifera uncharacterized LOC100265424 (LOC100265424), mRNA	-	-	COG1181	D-alanine-D-alanine ligase and related ATP-grasp enzymes	-	-	-	GO:0009252//peptidoglycan biosynthetic process	GO:0046872//metal ion binding;GO:0005524//ATP binding;GO:0008716//D-alanine-D-alanine ligase activity	GO:0005618//cell wall;GO:0009507//chloroplast
72	CSE_Unigene13954	SW_Unigene11651	+	-	+(Mostly)	960	0.997	3	2	1	0.166494	0.141164	gi|225441910|ref|XP_002284489.1|	PREDICTED: S-formylglutathione hydrolase isoform 1 [Vitis vinifera] >gi|297739618|emb|CBI29800.3| unnamed protein product [Vitis vinifera]	gi|349725949|emb|FQ393901.1|	Vitis vinifera clone SS0AFA23YJ20	sp|Q8LAS8|SFGH_ARATH	S-formylglutathione hydrolase OS=Arabidopsis thaliana GN=SFGH PE=1 SV=2	COG0627	Predicted esterase	K01070	vvi:100253701	S-formylglutathione hydrolase [EC:3.1.2.12]	GO:0046686//response to cadmium ion;GO:0046294//formaldehyde catabolic process	GO:0004091//carboxylesterase activity;GO:0018738//S-formylglutathione hydrolase activity	GO:0016023//cytoplasmic membrane-bounded vesicle;GO:0048046//apoplast;GO:0009536//plastid
73	CSE_Unigene18885	SW_Unigene17368	+	-	+(Mostly)	1395	0.985	15	8	7	0.30708	0.0224477	gi|225441840|ref|XP_002278289.1|	PREDICTED: cytoplasmic tRNA 2-thiolation protein 2 [Vitis vinifera] >gi|297739656|emb|CBI29838.3| unnamed protein product [Vitis vinifera]	gi|225441839|ref|XM_002278253.1|	PREDICTED: Vitis vinifera cytoplasmic tRNA 2-thiolation protein 2-like (LOC100252179), mRNA	sp|O65628|CTU2_ARATH	Cytoplasmic tRNA 2-thiolation protein 2 OS=Arabidopsis thaliana GN=CTU2 PE=2 SV=3	-	-	K14169	vvi:100252179	cytoplasmic tRNA 2-thiolation protein 2	GO:0008033//tRNA processing	-	GO:0005737//cytoplasm
74	CSE_Unigene19088	SW_Unigene204	+	-	+(Mostly)	690	0.99	7	7	NA	0	NA	gi|225441811|ref|XP_002283887.1|	PREDICTED: ABC transporter I family member 1 [Vitis vinifera] >gi|147811123|emb|CAN61350.1| hypothetical protein VITISV_021799 [Vitis vinifera] >gi|297739670|emb|CBI29852.3| unnamed protein product [Vitis vinifera]	gi|359481607|ref|XM_002283851.2|	PREDICTED: Vitis vinifera ABC transporter I family member 1-like (LOC100267504), mRNA	sp|Q9C8T1|AB1I_ARATH	ABC transporter I family member 1 OS=Arabidopsis thaliana GN=ABCI1 PE=2 SV=1	COG4133	ABC-type transport system involved in cytochrome c biogenesis, ATPase component	K05658	sbi:SORBI_07g023730	ATP-binding cassette, subfamily B (MDR/TAP), member 1	GO:0006810//transport;GO:0017004//cytochrome complex assembly;GO:0006200//ATP catabolic process	GO:0015439//heme-transporting ATPase activity;GO:0005524//ATP binding	GO:0030288//outer membrane-bounded periplasmic space;GO:0005886//plasma membrane
75	CSE_Unigene12649	SW_CL7383_Contig2	+	-	+(Mostly)	513	0.992	4	1	3	1.15779	0.72433	gi|225441742|ref|XP_002283156.1|	PREDICTED: uncharacterized protein LOC100245318 [Vitis vinifera] >gi|297739700|emb|CBI29882.3| unnamed protein product [Vitis vinifera]	gi|359481822|ref|XM_002283120.2|	PREDICTED: Vitis vinifera uncharacterized LOC100245318 (LOC100245318), mRNA	-	-	-	-	K11663	vvi:100245318	zinc finger HIT domain-containing protein 1	GO:0042742//defense response to bacterium;GO:0048638//regulation of developmental growth;GO:0006338//chromatin remodeling;GO:0009909//regulation of flower development	GO:0042802//identical protein binding	GO:0005634//nucleus;GO:0009536//plastid
76	CSE_Unigene12564	SW_Unigene8321	+	-	+(Mostly)	666	1	0	NA	NA	NA	NA	gi|225441601|ref|XP_002281697.1|	PREDICTED: eukaryotic translation initiation factor 4E type 3 [Vitis vinifera] >gi|297739767|emb|CBI29949.3| unnamed protein product [Vitis vinifera]	gi|349715819|emb|FQ387111.1|	Vitis vinifera clone SS0AEB27YK16	sp|A3RCV9|IF4E3_WHEAT	Eukaryotic translation initiation factor NCBP OS=Triticum aestivum GN=NCBP PE=2 SV=1	COG5053	Translation initiation factor 4E (eIF-4E)	K03259	vvi:100258939	translation initiation factor 4E	GO:0006413//translational initiation;GO:0006417//regulation of translation	GO:0003743//translation initiation factor activity	GO:0005737//cytoplasm
77	CSE_Unigene11655	SW_CL2408_Contig1	+	-	+(Mostly)	759	0.991	7	5	2	0.138795	0.0149793	gi|359481865|ref|XP_002280176.2|	PREDICTED: DNA-3-methyladenine glycosylase [Vitis vinifera] >gi|297739818|emb|CBI30000.3| unnamed protein product [Vitis vinifera]	gi|359481864|ref|XM_002280140.2|	PREDICTED: Vitis vinifera DNA-3-methyladenine glycosylase-like (LOC100250307), mRNA	sp|Q39147|3MG_ARATH	DNA-3-methyladenine glycosylase OS=Arabidopsis thaliana GN=MAG PE=2 SV=1	COG2094	3-methyladenine DNA glycosylase	K03652	rcu:RCOM_0278080	DNA-3-methyladenine glycosylase [EC:3.2.2.21]	GO:0006284//base-excision repair	GO:0052821//DNA-7-methyladenine glycosylase activity;GO:0003677//DNA binding;GO:0008725//DNA-3-methyladenine glycosylase activity;GO:0043916//DNA-7-methylguanine glycosylase activity;GO:0052822//DNA-3-methylguanine glycosylase activity	GO:0009536//plastid
78	CSE_Unigene12532	SW_Unigene23485	+	-	+(Mostly)	705	0.993	5	2	3	0.430428	0.31139	gi|225441393|ref|XP_002278312.1|	PREDICTED: uncharacterized protein LOC100241760 [Vitis vinifera] >gi|297739859|emb|CBI30041.3| unnamed protein product [Vitis vinifera]	gi|359482188|ref|XM_002278276.2|	PREDICTED: Vitis vinifera uncharacterized LOC100241760 (LOC100241760), mRNA	sp|O48529|STR9_ARATH	Rhodanese-like domain-containing protein 9, chloroplastic OS=Arabidopsis thaliana GN=STR9 PE=2 SV=1	-	-	-	-	-	GO:0019684//photosynthesis, light reaction;GO:0010103//stomatal complex morphogenesis;GO:0019344//cysteine biosynthetic process	-	GO:0009535//chloroplast thylakoid membrane
79	CSE_Unigene19420	SW_Unigene15747	+	-	+(Mostly)	5118	0.991	41	20	21	0.345704	0.000353334	gi|297739996|emb|CBI30178.3|	unnamed protein product [Vitis vinifera]	gi|359482277|ref|XM_003632700.1|	PREDICTED: Vitis vinifera HEAT repeat-containing protein 7A homolog (LOC100243631), mRNA	-	-	-	-	-	-	-	GO:0006486//protein glycosylation	-	GO:0005634//nucleus
80	CSE_Unigene443	SW_Unigene15373	+	-	+(Mostly)	462	0.985	7	4	3	0.235405	0.0629411	gi|225440888|ref|XP_002282626.1|	PREDICTED: iron-sulfur assembly protein IscA-like 2, mitochondrial [Vitis vinifera] >gi|297740113|emb|CBI30295.3| unnamed protein product [Vitis vinifera]	gi|225440887|ref|XM_002282590.1|	PREDICTED: Vitis vinifera iron-sulfur assembly protein IscA-like 2, mitochondrial (LOC100244143), mRNA	sp|Q8LCY2|ISAM2_ARATH	Iron-sulfur assembly protein IscA-like 2, mitochondrial OS=Arabidopsis thaliana GN=At5g03905 PE=2 SV=2	COG0316	Uncharacterized conserved protein	K13628	smo:SELMODRAFT_173619	iron-sulfur cluster assembly protein	GO:0019243//methylglyoxal catabolic process to D-lactate;GO:0016226//iron-sulfur cluster assembly	GO:0051536//iron-sulfur cluster binding;GO:0005198//structural molecule activity	GO:0005739//mitochondrion
81	CSE_Unigene12705	SW_Unigene14275	+	-	+(Mostly)	855	0.995	4	1	3	1.01428	0.684813	gi|225440878|ref|XP_002282544.1|	PREDICTED: heme-binding-like protein At3g10130, chloroplastic-like [Vitis vinifera]	gi|359481600|ref|XM_002282508.2|	PREDICTED: Vitis vinifera heme-binding-like protein At3g10130, chloroplastic-like (LOC100256254), mRNA	sp|Q9SR77|HBPL1_ARATH	Heme-binding-like protein At3g10130, chloroplastic OS=Arabidopsis thaliana GN=At3g10130 PE=1 SV=1	-	-	-	-	-	-	-	GO:0009535//chloroplast thylakoid membrane;GO:0010287//plastoglobule
82	CSE_CL835_Contig2	SW_CL6770_Contig1	+	-	+(Mostly)	786	0.989	9	2	7	1.31291	0.943873	gi|297740209|emb|CBI30391.3|	unnamed protein product [Vitis vinifera]	gi|359482054|ref|XM_002274789.2|	PREDICTED: Vitis vinifera methyltransferase-like protein 21C-like (LOC100263030), mRNA	-	-	COG3897	Predicted methyltransferase	-	-	-	-	-	GO:0005737//cytoplasm
83	CSE_Unigene13896	SW_Unigene22427	+	-	+(Mostly)	1425	0.996	6	2	4	0.812958	0.870963	gi|225440640|ref|XP_002279057.1|	PREDICTED: BTB/POZ domain-containing protein At3g09030-like [Vitis vinifera]	gi|123719966|emb|AM439472.1|	Vitis vinifera, whole genome shotgun sequence, contig VV78X196164.19, clone ENTAV 115	sp|Q9S7R7|Y3903_ARATH	BTB/POZ domain-containing protein At3g09030 OS=Arabidopsis thaliana GN=At3g09030 PE=2 SV=1	-	-	K15074	pop:POPTR_593739	BTB/POZ domain-containing adapter for CUL3-mediated RhoA degradation protein	GO:0051260//protein homooligomerization;GO:0006813//potassium ion transport	GO:0005249//voltage-gated potassium channel activity	GO:0008076//voltage-gated potassium channel complex;GO:0005634//nucleus
84	CSE_Unigene321	SW_CL5175_Contig1	+	-	+(Mostly)	957	0.998	2	NA	2	NA	NA	gi|225440382|ref|XP_002267244.1|	PREDICTED: p21-activated protein kinase-interacting protein 1-like [Vitis vinifera] >gi|297740361|emb|CBI30543.3| unnamed protein product [Vitis vinifera]	gi|359481774|ref|XM_002267208.2|	PREDICTED: Vitis vinifera p21-activated protein kinase-interacting protein 1-like (LOC100257947), mRNA	sp|Q9SX31|PERK9_ARATH	Proline-rich receptor-like protein kinase PERK9 OS=Arabidopsis thaliana GN=PERK9 PE=2 SV=1	COG2319	FOG: WD40 repeat	K14830	vvi:100257947	protein MAK11	GO:0016310//phosphorylation	GO:0016301//kinase activity;GO:0005515//protein binding;GO:0000166//nucleotide binding	GO:0005737//cytoplasm;GO:0005730//nucleolus;GO:0005834//heterotrimeric G-protein complex;GO:0080008//Cul4-RING ubiquitin ligase complex
85	CSE_Unigene17468	SW_Unigene7702	+	-	+(Mostly)	1380	0.991	12	4	8	0.94959	0.752111	gi|359483160|ref|XP_002264393.2|	PREDICTED: uncharacterized protein LOC100241596 [Vitis vinifera] >gi|298204672|emb|CBI25170.3| unnamed protein product [Vitis vinifera]	gi|359483159|ref|XM_002264357.2|	PREDICTED: Vitis vinifera uncharacterized LOC100241596 (LOC100241596), mRNA	-	-	COG0859	ADP-heptose:LPS heptosyltransferase	-	-	-	GO:0006098//pentose-phosphate shunt;GO:0009773//photosynthetic electron transport in photosystem I;GO:0016117//carotenoid biosynthetic process;GO:0010207//photosystem II assembly	GO:0016757//transferase activity, transferring glycosyl groups	GO:0010598//NAD(P)H dehydrogenase complex (plastoquinone);GO:0009535//chloroplast thylakoid membrane
86	CSE_Unigene12601	SW_CL1748_Contig2	+	-	+(Mostly)	801	0.993	6	2	4	0.557773	0.390612	gi|225441957|ref|XP_002264196.1|	PREDICTED: uncharacterized protein C23H3.12c [Vitis vinifera] >gi|297742919|emb|CBI35786.3| unnamed protein product [Vitis vinifera]	gi|359482499|ref|XM_002264160.2|	PREDICTED: Vitis vinifera uncharacterized LOC100256558 (LOC100256558), mRNA	-	-	-	-	-	-	-	-	-	GO:0005774//vacuolar membrane;GO:0009536//plastid;GO:0005739//mitochondrion
87	CSE_Unigene16118	SW_Unigene15487	+	-	+(Mostly)	771	0.99	8	7	1	0.0539851	0.000708803	gi|225442396|ref|XP_002282496.1|	PREDICTED: putative mediator of RNA polymerase II transcription subunit 6 [Vitis vinifera]	gi|349716216|emb|FQ397198.1|	Vitis vinifera clone SS0AEB7YI15	sp|F4IXJ7|MED6_ARATH	Mediator of RNA polymerase II transcription subunit 6 OS=Arabidopsis thaliana GN=MED6 PE=1 SV=1	COG5097	RNA polymerase II transcriptional regulation mediator	K15128	vvi:100253150	mediator of RNA polymerase II transcription subunit 6	GO:0006357//regulation of transcription from RNA polymerase II promoter	GO:0001104//RNA polymerase II transcription cofactor activity	GO:0016592//mediator complex
88	CSE_Unigene19199	SW_Unigene6055	+	-	+(Mostly)	987	0.968	23	9	14	0.554058	0.228047	gi|297743320|emb|CBI36187.3|	unnamed protein product [Vitis vinifera]	gi|359482630|ref|XM_002280415.2|	PREDICTED: Vitis vinifera uncharacterized LOC100266851 (LOC100266851), mRNA	-	-	-	-	K10803	vvi:100266851	DNA-repair protein XRCC1	GO:0006266//DNA ligation;GO:1901969//positive regulation of polynucleotide 3'-phosphatase activity;GO:0006281//DNA repair;GO:1901972//positive regulation of DNA-5-methylcytosine glycosylase activity;GO:0080111//DNA demethylation	GO:0010385//double-stranded methylated DNA binding;GO:0003713//transcription coactivator activity	GO:0005634//nucleus
89	CSE_Unigene15214	SW_Unigene15725	+	-	+(Mostly)	1152	0.989	13	5.76861	7.23139	0.446294	0.0995902	gi|225442892|ref|XP_002263706.1|	PREDICTED: haloalkane dehalogenase [Vitis vinifera] >gi|297743495|emb|CBI36362.3| unnamed protein product [Vitis vinifera]	gi|359482381|ref|XM_002263670.2|	PREDICTED: Vitis vinifera haloalkane dehalogenase-like (LOC100250971), mRNA	-	-	COG0596	Predicted hydrolases or acyltransferases (alpha/beta hydrolase superfamily)	-	-	-	GO:0016556//mRNA modification;GO:0006468//protein phosphorylation	GO:0004674//protein serine/threonine kinase activity;GO:0018786;GO:0005524//ATP binding	GO:0009941//chloroplast envelope;GO:0009570//chloroplast stroma
90	CSE_CL5590_Contig2	SW_CL5993_Contig3	+	-	+(Mostly)	546	0.996	2	1	1	0.344843	0.382617	gi|225443539|ref|XP_002277179.1|	PREDICTED: D-tyrosyl-tRNA(Tyr) deacylase-like [Vitis vinifera]	gi|225443538|ref|XM_002277143.1|	PREDICTED: Vitis vinifera D-tyrosyl-tRNA(Tyr) deacylase-like (LOC100252068), mRNA	-	-	COG1490	D-Tyr-tRNAtyr deacylase	K07560	vvi:100252068	D-tyrosyl-tRNA(Tyr) deacylase [EC:3.1.-.-]	GO:0019478//D-amino acid catabolic process	GO:0004812//aminoacyl-tRNA ligase activity;GO:0016788//hydrolase activity, acting on ester bonds	GO:0005737//cytoplasm
91	CSE_Unigene20388	SW_Unigene8134	+	-	+(Mostly)	1998	0.991	17	9	8	0.339948	0.0248811	gi|225463376|ref|XP_002271571.1|	PREDICTED: uncharacterized protein LOC100251997 [Vitis vinifera] >gi|297740629|emb|CBI30811.3| unnamed protein product [Vitis vinifera]	gi|225463375|ref|XM_002271535.1|	PREDICTED: Vitis vinifera uncharacterized LOC100251997 (LOC100251997), mRNA	sp|O64765|UAP1_ARATH	Probable UDP-N-acetylglucosamine pyrophosphorylase OS=Arabidopsis thaliana GN=At2g35020 PE=2 SV=1	COG0806	RimM protein, required for 16S rRNA processing	K02860	olu:OSTLU_38467	16S rRNA processing protein RimM	GO:0035196//production of miRNAs involved in gene silencing by miRNA;GO:0006364//rRNA processing;GO:0010267//production of ta-siRNAs involved in RNA interference;GO:0000023//maltose metabolic process;GO:0019252//starch biosynthetic process;GO:0051607//defense response to virus;GO:0043085//positive regulation of catalytic activity	GO:0043022//ribosome binding	GO:0005840//ribosome;GO:0009507//chloroplast
92	CSE_Unigene13926	SW_Unigene22025	+	-	+(Mostly)	864	0.997	3	2	1	0.140237	0.113149	gi|297740671|emb|CBI30853.3|	unnamed protein product [Vitis vinifera]	gi|359483855|ref|XM_002276099.2|	PREDICTED: Vitis vinifera uncharacterized LOC100248605 (LOC100248605), mRNA	sp|Q8H124|Y2446_ARATH	Uncharacterized protein At2g34460, chloroplastic OS=Arabidopsis thaliana GN=At2g34460 PE=1 SV=1	COG0702	Predicted nucleoside-diphosphate-sugar epimerases	-	-	-	GO:0010264//myo-inositol hexakisphosphate biosynthetic process	GO:0000166//nucleotide binding	GO:0010287//plastoglobule;GO:0009941//chloroplast envelope;GO:0009535//chloroplast thylakoid membrane;GO:0005739//mitochondrion
93	CSE_Unigene19601	SW_Unigene5751	+	-	+(Mostly)	1530	0.994	9	3	6	0.506398	0.268263	gi|359483911|ref|XP_002272288.2|	PREDICTED: uncharacterized protein LOC100251522 [Vitis vinifera] >gi|297740769|emb|CBI30951.3| unnamed protein product [Vitis vinifera]	gi|359483910|ref|XM_002272252.2|	PREDICTED: Vitis vinifera uncharacterized LOC100251522 (LOC100251522), mRNA	-	-	-	-	-	-	-	GO:0042793//transcription from plastid promoter;GO:0045893//positive regulation of transcription, DNA-dependent;GO:0008283//cell proliferation	-	GO:0009508//plastid chromosome;GO:0009507//chloroplast;GO:0005634//nucleus
94	CSE_Unigene12414	SW_Unigene8731	+	-	+(Mostly)	891	0.998	2	1	1	0.32915	0.373403	gi|225466968|ref|XP_002267887.1|	PREDICTED: peptidyl-prolyl cis-trans isomerase B-like [Vitis vinifera]	gi|225466967|ref|XM_002267851.1|	PREDICTED: Vitis vinifera peptidyl-prolyl cis-trans isomerase B-like (LOC100247841), mRNA	sp|Q41651|CYPB_VICFA	Peptidyl-prolyl cis-trans isomerase, chloroplastic OS=Vicia faba PE=1 SV=1	COG0652	Peptidyl-prolyl cis-trans isomerase (rotamase) - cyclophilin family	K03768	sbi:SORBI_09g000350	peptidyl-prolyl cis-trans isomerase B (cyclophilin B) [EC:5.2.1.8]	GO:0006457//protein folding;GO:0000413//protein peptidyl-prolyl isomerization	GO:0003755//peptidyl-prolyl cis-trans isomerase activity	GO:0031977//thylakoid lumen;GO:0009507//chloroplast
95	CSE_Unigene15439	SW_Unigene12665	+	-	+(Mostly)	621	0.984	10	7	3	0.163696	0.00698643	gi|225444850|ref|XP_002281014.1|	PREDICTED: uncharacterized protein ywkD-like [Vitis vinifera]	gi|359484464|ref|XM_002280978.2|	PREDICTED: Vitis vinifera uncharacterized LOC100242371 (LOC100242371), mRNA	-	-	COG0346	Lactoylglutathione lyase and related lyases	K08234	ath:AT5G57040	glyoxylase I family protein	GO:0008152//metabolic process	GO:0016829//lyase activity	GO:0009507//chloroplast
96	CSE_Unigene18633	SW_CL7537_Contig2	+	-	+(Mostly)	591	0.97	18	4.53371	13.4663	0.862209	0.766208	gi|297738639|emb|CBI27884.3|	unnamed protein product [Vitis vinifera]	gi|349703400|emb|FQ383363.1|	Vitis vinifera clone SS0ABG21YK02	sp|Q8L4M1|DWA1_ARATH	WD repeat-containing protein DWA1 OS=Arabidopsis thaliana GN=DWA1 PE=1 SV=1	COG2319	FOG: WD40 repeat	K13175	vvi:100244028	THO complex subunit 6	GO:0009788//negative regulation of abscisic acid mediated signaling pathway;GO:0048608//reproductive structure development;GO:0016567//protein ubiquitination;GO:0010100//negative regulation of photomorphogenesis;GO:0010267//production of ta-siRNAs involved in RNA interference;GO:0006281//DNA repair	GO:0005515//protein binding;GO:0008026//ATP-dependent helicase activity;GO:0003676//nucleic acid binding;GO:0005524//ATP binding	GO:0080008//Cul4-RING ubiquitin ligase complex;GO:0005737//cytoplasm;GO:0005634//nucleus
97	CSE_Unigene17804	SW_Unigene16110	+	-	+(Mostly)	1500	0.993	10	5	5	0.296911	0.0566065	gi|359484508|ref|XP_002282779.2|	PREDICTED: xaa-Pro dipeptidase-like [Vitis vinifera] >gi|297738698|emb|CBI27943.3| unnamed protein product [Vitis vinifera]	gi|359484507|ref|XM_002282743.2|	PREDICTED: Vitis vinifera xaa-Pro dipeptidase-like (LOC100244094), mRNA	-	-	COG0006	Xaa-Pro aminopeptidase	K14213	vvi:100244094	Xaa-Pro dipeptidase [EC:3.4.13.9]	GO:0009987//cellular process	GO:0016805//dipeptidase activity;GO:0030145//manganese ion binding;GO:0004177//aminopeptidase activity	GO:0009536//plastid
98	CSE_Unigene14041	SW_CL8503_Contig1	+	-	+(Mostly)	858	0.988	10	4	6	0.444193	0.178852	gi|225445152|ref|XP_002284033.1|	PREDICTED: 7SK snRNA methylphosphate capping enzyme [Vitis vinifera] >gi|297738783|emb|CBI28028.3| unnamed protein product [Vitis vinifera]	gi|359484560|ref|XM_002283997.2|	PREDICTED: Vitis vinifera 7SK snRNA methylphosphate capping enzyme-like (LOC100261137), mRNA	sp|Q6NPC9|BIN3D_ARATH	Probable RNA methyltransferase At5g51130 OS=Arabidopsis thaliana GN=At5g51130 PE=2 SV=1	-	-	K15190	vvi:100261137	7SK snRNA methylphosphate capping enzyme [EC:2.1.1.-]	GO:0009640//photomorphogenesis;GO:0010388//cullin deneddylation;GO:0016567//protein ubiquitination;GO:0016579//protein deubiquitination;GO:0045893//positive regulation of transcription, DNA-dependent;GO:0016571//histone methylation	GO:0008276//protein methyltransferase activity	GO:0005737//cytoplasm
99	CSE_Unigene13886	SW_Unigene15726	+	-	+(Mostly)	690	0.993	5	3	2	0.229078	0.01605	gi|359484837|ref|XP_003633171.1|	PREDICTED: 26S proteasome non-ATPase regulatory subunit 9-like isoform 2 [Vitis vinifera] >gi|297743643|emb|CBI36526.3| unnamed protein product [Vitis vinifera]	gi|359484836|ref|XM_003633123.1|	PREDICTED: Vitis vinifera 26S proteasome non-ATPase regulatory subunit 9-like, transcript variant 2 (LOC100258659), mRNA	-	-	COG0265	Trypsin-like serine proteases, typically periplasmic, contain C-terminal PDZ domain	K06693	vvi:100258659	26S proteasome non-ATPase regulatory subunit 9	GO:0043161//proteasomal ubiquitin-dependent protein catabolic process;GO:0051510//regulation of unidimensional cell growth;GO:0035556//intracellular signal transduction;GO:0043248//proteasome assembly;GO:0051788//response to misfolded protein;GO:0042023//DNA endoreduplication	-	GO:0005838//proteasome regulatory particle
100	CSE_Unigene17303	SW_Unigene8078	+	-	+(Mostly)	1071	0.989	12	8	4	0.162527	0.00255072	gi|225445772|ref|XP_002273237.1|	PREDICTED: uncharacterized protein LOC100251872 [Vitis vinifera] >gi|297743697|emb|CBI36580.3| unnamed protein product [Vitis vinifera]	gi|359484806|ref|XM_002273201.2|	PREDICTED: Vitis vinifera uncharacterized LOC100251872 (LOC100251872), mRNA	sp|Q9LK03|PERK2_ARATH	Proline-rich receptor-like protein kinase PERK2 OS=Arabidopsis thaliana GN=PERK2 PE=2 SV=3	-	-	K14305	smo:SELMODRAFT_74209	nuclear pore complex protein Nup43	GO:0006261//DNA-dependent DNA replication	GO:0005515//protein binding	GO:0005635//nuclear envelope;GO:0009507//chloroplast
101	CSE_Unigene18624	SW_Unigene21435	+	-	+(Mostly)	1116	0.989	9	5	4	0.237925	0.03497	gi|297735328|emb|CBI17768.3|	unnamed protein product [Vitis vinifera]	gi|359485033|ref|XM_002277484.2|	PREDICTED: Vitis vinifera xylose isomerase-like (LOC100254769), mRNA	sp|Q9FKK7|XYLA_ARATH	Xylose isomerase OS=Arabidopsis thaliana GN=XYLA PE=2 SV=2	COG2115	Xylose isomerase	K01805	vvi:100254769	xylose isomerase [EC:5.3.1.5]	GO:0006098//pentose-phosphate shunt;GO:0042732//D-xylose metabolic process	GO:0046872//metal ion binding;GO:0009045//xylose isomerase activity	GO:0005774//vacuolar membrane;GO:0016023//cytoplasmic membrane-bounded vesicle;GO:0005783//endoplasmic reticulum;GO:0005794//Golgi apparatus;GO:0005886//plasma membrane
102	CSE_Unigene19330	SW_Unigene14749	+	-	+(Mostly)	2328	0.994	13	7	6	0.28722	0.0250098	gi|225445638|ref|XP_002265193.1|	PREDICTED: cleavage stimulation factor subunit 3 [Vitis vinifera] >gi|297736046|emb|CBI24084.3| unnamed protein product [Vitis vinifera]	gi|359484927|ref|XM_002265157.2|	PREDICTED: Vitis vinifera cleavage stimulation factor subunit 3-like (LOC100262033), mRNA	-	-	COG5107	Pre-mRNA 3'-end processing (cleavage and polyadenylation) factor	K14408	vvi:100262033	cleavage stimulation factor subunit 3	GO:0000278//mitotic cell cycle;GO:0031123//RNA 3'-end processing;GO:0009630//gravitropism;GO:0006397//mRNA processing;GO:0045892//negative regulation of transcription, DNA-dependent	GO:0003729//mRNA binding;GO:0005515//protein binding	GO:0005634//nucleus
103	CSE_CL6459_Contig3	SW_CL8306_Contig1	+	-	+(Mostly)	948	0.978	12	7	5	0.218975	0.010245	gi|225447482|ref|XP_002264683.1|	PREDICTED: uncharacterized protein LOC100249313 isoform 1 [Vitis vinifera] >gi|359485781|ref|XP_003633334.1| PREDICTED: uncharacterized protein LOC100249313 isoform 2 [Vitis vinifera]	gi|225447481|ref|XM_002264647.1|	PREDICTED: Vitis vinifera uncharacterized LOC100249313, transcript variant 1 (LOC100249313), mRNA	-	-	-	-	-	-	-	GO:0001510//RNA methylation	-	GO:0005730//nucleolus
104	CSE_CL6412_Contig1	SW_CL1690_Contig7	+	-	+(Mostly)	1065	0.976	20	10	10	0.368137	0.0364731	gi|359487457|ref|XP_002268254.2|	PREDICTED: protein N-terminal asparagine amidohydrolase-like [Vitis vinifera]	gi|359487456|ref|XM_002268218.2|	PREDICTED: Vitis vinifera protein N-terminal asparagine amidohydrolase-like (LOC100245927), mRNA	-	-	-	-	K14662	vvi:100245927	protein N-terminal asparagine amidohydrolase [EC:3.5.1.-]	GO:0006499//N-terminal protein myristoylation;GO:0009755//hormone-mediated signaling pathway	GO:0008418//protein-N-terminal asparagine amidohydrolase activity	GO:0009507//chloroplast
105	CSE_CL263_Contig1	SW_CL4377_Contig1	+	-	+(Mostly)	717	0.985	11	4	7	0.564622	0.433326	gi|225448890|ref|XP_002270872.1|	PREDICTED: uncharacterized protein SYNPCC7002_A1590 [Vitis vinifera] >gi|296085939|emb|CBI31380.3| unnamed protein product [Vitis vinifera]	gi|359486787|ref|XM_002270836.2|	PREDICTED: Vitis vinifera uncharacterized LOC100249596 (LOC100249596), mRNA	-	-	-	-	-	-	-	-	-	GO:0005634//nucleus;GO:0009507//chloroplast
106	CSE_Unigene10369	SW_Unigene14031	+	-	+(Mostly)	690	0.98	8	3	5	0.62233	0.378156	gi|225449466|ref|XP_002283276.1|	PREDICTED: ribosomal RNA large subunit methyltransferase E [Vitis vinifera] >gi|296086215|emb|CBI31656.3| unnamed protein product [Vitis vinifera]	gi|359486793|ref|XM_002283240.2|	PREDICTED: Vitis vinifera ribosomal RNA large subunit methyltransferase E-like (LOC100247875), mRNA	-	-	COG0293	23S rRNA methylase	K14857	ppp:PHYPADRAFT_105018	AdoMet-dependent rRNA methyltransferase SPB1 [EC:2.1.1.-]	GO:0019243//methylglyoxal catabolic process to D-lactate;GO:0001510//RNA methylation	GO:0003676//nucleic acid binding;GO:0008168//methyltransferase activity	GO:0005737//cytoplasm
107	CSE_Unigene14683	SW_Unigene17119	+	-	+(Mostly)	1344	0.99	14	6	8	0.476443	0.205794	gi|297736340|emb|CBI24978.3|	unnamed protein product [Vitis vinifera]	gi|359487425|ref|XM_002271652.2|	PREDICTED: Vitis vinifera F-box/WD-40 repeat-containing protein At3g52030-like (LOC100243045), mRNA	sp|Q9SV01|FBW4_ARATH	F-box/WD-40 repeat-containing protein At3g52030 OS=Arabidopsis thaliana GN=At3g52030 PE=2 SV=2	-	-	K14963	ppp:PHYPADRAFT_56981	COMPASS component SWD3	-	-	GO:0044424//intracellular part
108	CSE_Unigene18903	SW_Unigene21941	+	-	+(Mostly)	1236	0.997	4	4	NA	0	NA	gi|225448765|ref|XP_002281688.1|	PREDICTED: macrophage erythroblast attacher [Vitis vinifera] >gi|297736449|emb|CBI25320.3| unnamed protein product [Vitis vinifera]	gi|225448764|ref|XM_002281652.1|	PREDICTED: Vitis vinifera macrophage erythroblast attacher-like (LOC100257054), mRNA	-	-	COG5109	Uncharacterized conserved protein, contains RING Zn-finger	-	-	-	-	-	GO:0005634//nucleus;GO:0005829//cytosol;GO:0009536//plastid
109	CSE_Unigene16064	SW_Unigene22323	+	-	+(Mostly)	1080	0.994	6	6	NA	0	NA	gi|225448631|ref|XP_002274357.1|	PREDICTED: uncharacterized protein LOC100262145 [Vitis vinifera] >gi|297736518|emb|CBI25389.3| unnamed protein product [Vitis vinifera]	gi|359486348|ref|XM_002274321.2|	PREDICTED: Vitis vinifera uncharacterized LOC100262145 (LOC100262145), mRNA	-	-	COG0637	Predicted phosphatase/phosphohexomutase	-	-	-	GO:0008152//metabolic process	GO:0016787//hydrolase activity	GO:0009507//chloroplast
110	CSE_Unigene12514	SW_Unigene14911	+	-	+(Mostly)	1650	0.979	29	10	19	0.579664	0.18343	gi|359486480|ref|XP_002273379.2|	PREDICTED: sister chromatid cohesion 1 protein 1-like [Vitis vinifera]	gi|359486479|ref|XM_002273343.2|	PREDICTED: Vitis vinifera sister chromatid cohesion 1 protein 1-like (LOC100262148), mRNA	sp|Q9S7T7|SCC11_ARATH	Sister chromatid cohesion 1 protein 1 OS=Arabidopsis thaliana GN=SYN1 PE=2 SV=2	-	-	-	-	-	GO:0045132//meiotic chromosome segregation;GO:0006259//DNA metabolic process;GO:0007062//sister chromatid cohesion;GO:0007127//meiosis I;GO:0070192	-	GO:0043231//intracellular membrane-bounded organelle;GO:0005694//chromosome
111	CSE_CL7209_Contig1	SW_Unigene8802	+	-	+(Mostly)	555	0.993	4	4	NA	0	NA	gi|225465829|ref|XP_002264063.1|	PREDICTED: thioredoxin-like protein CITRX, chloroplastic [Vitis vinifera] >gi|296087861|emb|CBI35117.3| unnamed protein product [Vitis vinifera]	gi|359487143|ref|XM_002264027.2|	PREDICTED: Vitis vinifera thioredoxin-like protein CITRX, chloroplastic (LOC100254862), mRNA	sp|Q9M7X9|CITRX_ARATH	Thioredoxin-like protein CITRX, chloroplastic OS=Arabidopsis thaliana GN=At3g06730 PE=1 SV=1	COG0526	Thiol-disulfide isomerase and thioredoxins	K03671	bdi:100821992	thioredoxin 1	GO:0006662//glycerol ether metabolic process;GO:0022900//electron transport chain;GO:0006364//rRNA processing;GO:0045454//cell redox homeostasis;GO:0009658//chloroplast organization;GO:0006399//tRNA metabolic process;GO:0042793//transcription from plastid promoter;GO:0045893//positive regulation of transcription, DNA-dependent;GO:0045036//protein targeting to chloroplast	GO:0047134//protein-disulfide reductase activity;GO:0009055//electron carrier activity;GO:0015035//protein disulfide oxidoreductase activity	GO:0009295//nucleoid;GO:0009579//thylakoid;GO:0009507//chloroplast
112	CSE_Unigene572	SW_Unigene14967	+	-	+(Mostly)	1413	0.98	16	7	9	0.565903	0.276089	gi|225450919|ref|XP_002284549.1|	PREDICTED: protein AUXIN RESPONSE 4 [Vitis vinifera]	gi|359487755|ref|XM_002284513.2|	PREDICTED: Vitis vinifera protein AUXIN RESPONSE 4-like (LOC100264948), mRNA	sp|Q9FZ33|AXR4_ARATH	Protein AUXIN RESPONSE 4 OS=Arabidopsis thaliana GN=AXR4 PE=1 SV=1	-	-	-	-	-	GO:0009612//response to mechanical stimulus;GO:0009926//auxin polar transport;GO:0009733//response to auxin stimulus	-	GO:0005774//vacuolar membrane;GO:0005634//nucleus;GO:0005783//endoplasmic reticulum;GO:0005739//mitochondrion
113	CSE_Unigene18823	SW_Unigene16035	+	-	+(Mostly)	1449	0.991	13	4	9	1.06865	0.99375	gi|296090243|emb|CBI40062.3|	unnamed protein product [Vitis vinifera]	gi|359488598|ref|XM_003633738.1|	PREDICTED: Vitis vinifera uncharacterized LOC100262724 (LOC100262724), mRNA	-	-	-	-	K15031	aly:ARALYDRAFT_481036	transcription termination factor, mitochondrial	GO:0009658//chloroplast organization;GO:0009737//response to abscisic acid stimulus;GO:0009651//response to salt stress	-	GO:0005739//mitochondrion
114	CSE_CL6330_Contig1	SW_Unigene8491	+	-	+(Mostly)	1527	0.99	16	9	7	0.371852	0.0563912	gi|225452167|ref|XP_002264334.1|	PREDICTED: histone-lysine N-methyltransferase setd3 isoform 1 [Vitis vinifera]	gi|359488612|ref|XM_002264298.2|	PREDICTED: Vitis vinifera histone-lysine N-methyltransferase setd3-like, transcript variant 1 (LOC100255895), mRNA	sp|P94026|RBCMT_TOBAC	Ribulose-1,5 bisphosphate carboxylase/oxygenase large subunit N-methyltransferase, chloroplastic OS=Nicotiana tabacum GN=RBCMT PE=2 SV=1	-	-	K00592	aly:ARALYDRAFT_471564	[ribulose-bisphosphate carboxylase]-lysine N-methyltransferase [EC:2.1.1.127]	-	-	GO:0009570//chloroplast stroma
115	CSE_Unigene16598	SW_Unigene19219	+	-	+(Mostly)	606	0.997	2	2	NA	0	NA	gi|359487537|ref|XP_002282596.2|	PREDICTED: zinc finger matrin-type protein 2-like [Vitis vinifera] >gi|296089759|emb|CBI39578.3| unnamed protein product [Vitis vinifera]	gi|359487536|ref|XM_002282560.2|	PREDICTED: Vitis vinifera zinc finger matrin-type protein 2-like (LOC100263190), mRNA	-	-	-	-	K12848	vvi:100263190	U4/U6.U5 tri-snRNP component SNU23	-	GO:0003676//nucleic acid binding;GO:0008270//zinc ion binding	GO:0005634//nucleus
116	CSE_Unigene14468	SW_Unigene10629	+	-	+(Mostly)	564	0.986	8	5	3	0.267896	0.0668787	gi|147815337|emb|CAN67770.1|	hypothetical protein VITISV_010521 [Vitis vinifera]	gi|359488481|ref|XM_002270234.2|	PREDICTED: Vitis vinifera 50S ribosomal protein L27, chloroplastic-like (LOC100260093), mRNA	sp|Q9FLN4|RK27_ARATH	50S ribosomal protein L27, chloroplastic OS=Arabidopsis thaliana GN=RPL27 PE=2 SV=1	COG0211	Ribosomal protein L27	K02899	vvi:100260093	large subunit ribosomal protein L27	GO:0006412//translation	GO:0003735//structural constituent of ribosome	GO:0005840//ribosome;GO:0009941//chloroplast envelope;GO:0009570//chloroplast stroma;GO:0009579//thylakoid
117	CSE_Unigene11588	SW_Unigene15092	+	-	+(Mostly)	1503	0.995	8	6	2	0.105644	0.00348704	gi|298204401|emb|CBI16881.3|	unnamed protein product [Vitis vinifera]	gi|359488306|ref|XM_002279088.2|	PREDICTED: Vitis vinifera tryptophan synthase beta chain 2-like (LOC100261704), mRNA	sp|P14671|TRPB1_ARATH	Tryptophan synthase beta chain 1, chloroplastic OS=Arabidopsis thaliana GN=TSB1 PE=2 SV=1	COG1350	Predicted alternative tryptophan synthase beta-subunit (paralog of TrpB)	K06001	vvi:100261704	tryptophan synthase beta chain [EC:4.2.1.20]	GO:0000162//tryptophan biosynthetic process	GO:0052684//L-serine hydro-lyase (adding indole, L-tryptophan-forming) activity;GO:0004834//tryptophan synthase activity;GO:0042803//protein homodimerization activity;GO:0030170//pyridoxal phosphate binding	GO:0009507//chloroplast
118	CSE_Unigene14969	SW_Unigene8799	+	-	+(Mostly)	1281	0.992	7	2	5	0.986152	0.583424	gi|225453238|ref|XP_002265039.1|	PREDICTED: protoheme IX farnesyltransferase, mitochondrial [Vitis vinifera] >gi|297734684|emb|CBI16735.3| unnamed protein product [Vitis vinifera]	gi|225453237|ref|XM_002265003.1|	PREDICTED: Vitis vinifera protoheme IX farnesyltransferase, mitochondrial-like (LOC100261621), mRNA	sp|O64886|COX10_ARATH	Protoheme IX farnesyltransferase, mitochondrial OS=Arabidopsis thaliana GN=COX10 PE=2 SV=4	COG0109	Polyprenyltransferase (cytochrome oxidase assembly factor)	K02257	vvi:100261621	protoheme IX farnesyltransferase [EC:2.5.1.-]	GO:0048034//heme O biosynthetic process	GO:0008495//protoheme IX farnesyltransferase activity	GO:0005886//plasma membrane;GO:0016021//integral to membrane;GO:0005739//mitochondrion
119	CSE_Unigene15644	SW_Unigene12705	+	-	+(Mostly)	954	0.991	9	5	4	0.327808	0.0887446	gi|225454083|ref|XP_002266457.1|	PREDICTED: methionine adenosyltransferase 2 subunit beta isoform 1 [Vitis vinifera] >gi|297745208|emb|CBI40288.3| unnamed protein product [Vitis vinifera]	gi|359489752|ref|XM_002266421.2|	PREDICTED: Vitis vinifera methionine adenosyltransferase 2 subunit beta-like, transcript variant 1 (LOC100246496), mRNA	-	-	COG1091	dTDP-4-dehydrorhamnose reductase	-	-	-	GO:0045226//extracellular polysaccharide biosynthetic process;GO:0055114//oxidation-reduction process	GO:0016740//transferase activity;GO:0000166//nucleotide binding;GO:0008831//dTDP-4-dehydrorhamnose reductase activity	-
120	CSE_CL1710_Contig1	SW_Unigene16889	+	-	+(Mostly)	747	0.992	6	3	3	0.269617	0.115833	gi|359489811|ref|XP_002275559.2|	PREDICTED: uncharacterized protein LOC100262014 [Vitis vinifera]	gi|359489810|ref|XM_002275523.2|	PREDICTED: Vitis vinifera uncharacterized LOC100262014 (LOC100262014), mRNA	-	-	-	-	-	-	-	-	-	GO:0005840//ribosome;GO:0005739//mitochondrion
121	CSE_Unigene17189	SW_CL2105_Contig2	+	-	+(Mostly)	2433	0.993	16	11	5	0.11354	3.39498e-05	gi|225454359|ref|XP_002276054.1|	PREDICTED: uncharacterized protein LOC100258534 [Vitis vinifera]	gi|359489819|ref|XM_002276018.2|	PREDICTED: Vitis vinifera uncharacterized LOC100258534 (LOC100258534), mRNA	-	-	-	-	-	-	-	-	-	GO:0005576//extracellular region;GO:0016020//membrane
122	CSE_Unigene16513	SW_Unigene14270	+	-	+(Mostly)	720	0.993	5	2	3	0.471498	0.34508	gi|225454436|ref|XP_002280302.1|	PREDICTED: exosome complex component RRP41 [Vitis vinifera] >gi|147867252|emb|CAN81194.1| hypothetical protein VITISV_022853 [Vitis vinifera] >gi|297745390|emb|CBI40470.3| unnamed protein product [Vitis vinifera]	gi|359489696|ref|XM_002280266.2|	PREDICTED: Vitis vinifera exosome complex component RRP41-like (LOC100265488), mRNA	sp|Q84T68|EXOS5_ORYSJ	Exosome complex exonuclease RRP46 homolog OS=Oryza sativa subsp. japonica GN=RRP46 PE=1 SV=2	COG0689	RNase PH	K11600	vvi:100265488	exosome complex component RRP41	-	GO:0009022//tRNA nucleotidyltransferase activity;GO:0004527//exonuclease activity	-
123	CSE_Unigene9739	SW_Unigene10546	+	-	+(Mostly)	678	0.985	10	4	6	0.555609	0.26002	gi|359489578|ref|XP_003633945.1|	PREDICTED: molybdopterin biosynthesis protein CNX3-like [Vitis vinifera] >gi|297745480|emb|CBI40560.3| unnamed protein product [Vitis vinifera]	gi|359489577|ref|XM_003633897.1|	PREDICTED: Vitis vinifera molybdopterin biosynthesis protein CNX3-like (LOC100853557), mRNA	sp|Q39056|CNX3_ARATH	Cyclic pyranopterin monophosphate synthase accessory protein, mitochondrial OS=Arabidopsis thaliana GN=CNX3 PE=1 SV=1	COG0315	Molybdenum cofactor biosynthesis enzyme	K03639	vvi:100853557	molybdenum cofactor biosynthesis protein	GO:0006777//Mo-molybdopterin cofactor biosynthetic process	GO:0003824//catalytic activity	GO:0009507//chloroplast;GO:0005739//mitochondrion
124	CSE_Unigene17430	SW_Unigene22519	+	-	+(Mostly)	1968	0.985	23	11	12	0.373794	0.0260917	gi|225453772|ref|XP_002270342.1|	PREDICTED: ankyrin repeat and zinc finger domain-containing protein 1-like [Vitis vinifera]	gi|225453771|ref|XM_002270306.1|	PREDICTED: Vitis vinifera ankyrin repeat and zinc finger domain-containing protein 1-like (LOC100254117), mRNA	-	-	COG3064	Membrane protein involved in colicin uptake	K15271	mtr:MTR_7g075500	ATP-dependent DNA helicase HFM1/MER3 [EC:3.6.4.12]	GO:0009630//gravitropism	-	GO:0009536//plastid
125	CSE_CL520_Contig1	SW_CL5247_Contig1	+	-	+(Mostly)	609	0.985	9	6	3	0.163995	0.0100022	gi|225470704|ref|XP_002263111.1|	PREDICTED: 3-hexulose-6-phosphate isomerase [Vitis vinifera] >gi|297741058|emb|CBI31789.3| unnamed protein product [Vitis vinifera]	gi|147771656|emb|AM431835.2|	Vitis vinifera contig VV78X267655.4, whole genome shotgun sequence	sp|Q6ZCX3|FH6_ORYSJ	Formin-like protein 6 OS=Oryza sativa subsp. japonica GN=FH6 PE=2 SV=2	COG0794	Predicted sugar phosphate isomerase involved in capsule formation	K01115	vcn:VOLCADRAFT_99471	phospholipase D [EC:3.1.4.4]	GO:0005975//carbohydrate metabolic process	GO:0030246//carbohydrate binding;GO:0016853//isomerase activity	-
126	CSE_Unigene14900	SW_Unigene16106	+	-	+(Mostly)	651	0.986	9	6	3	0.172701	0.0119428	gi|225455590|ref|XP_002269178.1|	PREDICTED: cysteine and histidine-rich domain-containing protein RAR1-like [Vitis vinifera]	gi|225455589|ref|XM_002269142.1|	PREDICTED: Vitis vinifera cysteine and histidine-rich domain-containing protein RAR1-like (LOC100246439), mRNA	sp|Q9SE33|RAR1_ARATH	Cysteine and histidine-rich domain-containing protein RAR1 OS=Arabidopsis thaliana GN=RAR1 PE=1 SV=1	-	-	K13458	vvi:100246439	disease resistance protein	GO:0009626//plant-type hypersensitive response;GO:0009817//defense response to fungus, incompatible interaction;GO:0002679//respiratory burst involved in defense response;GO:0050821//protein stabilization;GO:0009816//defense response to bacterium, incompatible interaction	GO:0051879//Hsp90 protein binding;GO:0008270//zinc ion binding	GO:0005634//nucleus
127	CSE_Unigene16111	SW_Unigene10736	+	-	+(Mostly)	525	0.981	10	3	7	0.960342	0.969265	gi|225455677|ref|XP_002264722.1|	PREDICTED: uncharacterized protein LOC100261162 [Vitis vinifera] >gi|296084154|emb|CBI24542.3| unnamed protein product [Vitis vinifera]	gi|359490185|ref|XM_002264686.2|	PREDICTED: Vitis vinifera uncharacterized LOC100261162 (LOC100261162), mRNA	-	-	-	-	-	-	-	GO:0035304//regulation of protein dephosphorylation;GO:0010207//photosystem II assembly;GO:0009902//chloroplast relocation;GO:0042742//defense response to bacterium;GO:0009773//photosynthetic electron transport in photosystem I;GO:0045893//positive regulation of transcription, DNA-dependent;GO:0042793//transcription from plastid promoter;GO:0006364//rRNA processing;GO:0010027//thylakoid membrane …	-	GO:0042651//thylakoid membrane;GO:0009534//chloroplast thylakoid
128	CSE_CL40_Contig1	SW_CL546_Contig3	+	-	+(Mostly)	1050	0.979	19	9	10	0.387878	0.0571718	gi|225454678|ref|XP_002269749.1|	PREDICTED: probable tocopherol O-methyltransferase, chloroplastic [Vitis vinifera]	gi|359489860|ref|XM_002269713.2|	PREDICTED: Vitis vinifera probable tocopherol O-methyltransferase, chloroplastic-like (LOC100242641), mRNA	sp|Q6ZIK0|GTOMC_ORYSJ	Probable tocopherol O-methyltransferase, chloroplastic OS=Oryza sativa subsp. japonica GN=VTE4 PE=2 SV=1	COG0500	SAM-dependent methyltransferases	K05928	vvi:100242641	tocopherol O-methyltransferase [EC:2.1.1.95]	GO:0032259//methylation;GO:0010189//vitamin E biosynthetic process	GO:0050342//tocopherol O-methyltransferase activity	-
129	CSE_Unigene14795	SW_Unigene13720	+	-	+(Mostly)	864	0.987	11	11	NA	0	NA	gi|225454710|ref|XP_002271758.1|	PREDICTED: 2-methoxy-6-polyprenyl-1,4-benzoquinol methylase, mitochondrial [Vitis vinifera] >gi|297737279|emb|CBI26480.3| unnamed protein product [Vitis vinifera]	gi|225454709|ref|XM_002271722.1|	PREDICTED: Vitis vinifera 2-methoxy-6-polyprenyl-1,4-benzoquinol methylase, mitochondrial-like (LOC100245886), mRNA	sp|Q9LVC8|COQ5_ARATH	2-methoxy-6-polyprenyl-1,4-benzoquinol methylase, mitochondrial OS=Arabidopsis thaliana GN=COQ5 PE=2 SV=1	COG2226	Methylase involved in ubiquinone/menaquinone biosynthesis	K06127	vvi:100245886	ubiquinone biosynthesis methyltransferase [EC:2.1.1.201]	GO:0006744//ubiquinone biosynthetic process;GO:0032259//methylation	GO:0008168//methyltransferase activity	GO:0005739//mitochondrion
130	CSE_Unigene15608	SW_CL7652_Contig2	+	-	+(Mostly)	900	0.993	6	2	4	0.617649	0.43365	gi|359490446|ref|XP_002275544.2|	PREDICTED: F-box protein At5g52880-like [Vitis vinifera] >gi|302143746|emb|CBI22607.3| unnamed protein product [Vitis vinifera]	gi|359490445|ref|XM_002275508.2|	PREDICTED: Vitis vinifera F-box protein At5g52880-like (LOC100257844), mRNA	sp|Q9FLX3|FB293_ARATH	F-box protein At5g52880 OS=Arabidopsis thaliana GN=At5g52880 PE=2 SV=1	-	-	-	-	-	-	-	GO:0043231//intracellular membrane-bounded organelle
131	CSE_Unigene1641	SW_Unigene13594	+	-	+(Mostly)	888	0.997	3	2	1	0.168881	0.143873	gi|225456794|ref|XP_002277650.1|	PREDICTED: protein CbbY [Vitis vinifera] >gi|297733644|emb|CBI14891.3| unnamed protein product [Vitis vinifera]	gi|225456793|ref|XM_002277614.1|	PREDICTED: Vitis vinifera protein CbbY-like (LOC100253525), mRNA	-	-	COG0637	Predicted phosphatase/phosphohexomutase	K00861	vvi:100261961	riboflavin kinase [EC:2.7.1.26]	GO:0090305//nucleic acid phosphodiester bond hydrolysis;GO:0006281//DNA repair;GO:0019684//photosynthesis, light reaction;GO:0010103//stomatal complex morphogenesis;GO:0006098//pentose-phosphate shunt;GO:0016117//carotenoid biosynthetic process;GO:0010027//thylakoid membrane organization;GO:0019252//starch biosynthetic process	GO:0004518//nuclease activity	GO:0009941//chloroplast envelope;GO:0009570//chloroplast stroma
132	CSE_Unigene12908	SW_Unigene25392	+	-	+(Mostly)	642	0.995	3	1	2	0.576893	0.522794	gi|225457126|ref|XP_002283569.1|	PREDICTED: uncharacterized protein At5g50100, mitochondrial [Vitis vinifera] >gi|297733833|emb|CBI15080.3| unnamed protein product [Vitis vinifera]	gi|359491610|ref|XM_002283533.2|	PREDICTED: Vitis vinifera uncharacterized LOC100250132 (LOC100250132), mRNA	sp|Q8W485|Y5010_ARATH	Uncharacterized protein At5g50100, mitochondrial OS=Arabidopsis thaliana GN=At5g50100 PE=1 SV=1	COG3011	Uncharacterized protein conserved in bacteria	-	-	-	-	-	GO:0005739//mitochondrion
133	CSE_Unigene959	SW_Unigene13973	+	-	+(Mostly)	993	0.99	10	7	3	0.153225	0.00498284	gi|297733956|emb|CBI15203.3|	unnamed protein product [Vitis vinifera]	gi|359491696|ref|XM_002281794.2|	PREDICTED: Vitis vinifera uncharacterized LOC100244920 (LOC100244920), mRNA	-	-	-	-	-	-	-	GO:0006457//protein folding;GO:0048573//photoperiodism, flowering;GO:0006950//response to stress	-	GO:0016023//cytoplasmic membrane-bounded vesicle;GO:0009507//chloroplast;GO:0005783//endoplasmic reticulum
134	CSE_Unigene10263	SW_Unigene25453	+	-	+(Mostly)	1152	0.997	4	4	NA	0	NA	gi|297734253|emb|CBI15500.3|	unnamed protein product [Vitis vinifera]	gi|225456026|ref|XM_002277167.1|	PREDICTED: Vitis vinifera UDP-N-acetylglucosamine-N-acetylmuramyl-(pentapeptide) pyrophosphoryl-undecaprenol N-acetylglucosamine transferase-like (LOC100242239), mRNA	-	-	COG0707	UDP-N-acetylglucosamine:LPS N-acetylglucosamine transferase	K02563	vvi:100242239	UDP-N-acetylglucosamine-N-acetylmuramyl-(pentapeptide) pyrophosphoryl-undecaprenol N-acetylglucosamine transferase [EC:2.4.1.227]	GO:0009693//ethylene biosynthetic process;GO:0019277;GO:0030259//lipid glycosylation	GO:0050511//undecaprenyldiphospho-muramoylpentapeptide beta-N-acetylglucosaminyltransferase activity;GO:0051991;GO:0030246//carbohydrate binding	GO:0005886//plasma membrane
135	CSE_Unigene14221	SW_Unigene13419	+	-	+(Mostly)	858	0.992	7	6	1	0.0737074	0.00419274	gi|225456280|ref|XP_002283559.1|	PREDICTED: cycloeucalenol cycloisomerase [Vitis vinifera] >gi|297734393|emb|CBI15640.3| unnamed protein product [Vitis vinifera]	gi|225456279|ref|XM_002283523.1|	PREDICTED: Vitis vinifera cycloeucalenol cycloisomerase-like (LOC100262783), mRNA	sp|Q9M643|CCI1_ARATH	Cycloeucalenol cycloisomerase OS=Arabidopsis thaliana GN=CPI1 PE=2 SV=1	-	-	K08246	vvi:100262783	cycloeucalenol cycloisomerase [EC:5.5.1.9]	GO:0016132//brassinosteroid biosynthetic process;GO:0006907//pinocytosis;GO:0009958//positive gravitropism;GO:0000910//cytokinesis;GO:0006084//acetyl-CoA metabolic process;GO:0007020//microtubule nucleation;GO:0016126//sterol biosynthetic process	GO:0047793//cycloeucalenol cycloisomerase activity	GO:0005739//mitochondrion;GO:0005783//endoplasmic reticulum
136	CSE_Unigene8942	SW_Unigene7589	+	-	+(Mostly)	1335	0.982	15	5	10	0.802833	0.768617	gi|359491815|ref|XP_002264379.2|	PREDICTED: UPF0176 protein pc0378-like [Vitis vinifera]	gi|359491814|ref|XM_002264343.2|	PREDICTED: Vitis vinifera UPF0176 protein pc0378-like (LOC100254727), mRNA	sp|F4I933|STR8_ARATH	Rhodanese-like domain-containing protein 8, chloroplastic OS=Arabidopsis thaliana GN=STR8 PE=2 SV=1	COG1054	Predicted sulfurtransferase	K10838	ota:Ot14g02880	xeroderma pigmentosum group C-complementing protein	GO:0016556//mRNA modification	-	GO:0005634//nucleus
137	CSE_CL2248_Contig2	SW_CL8234_Contig1	+	-	+(Mostly)	1173	0.997	4	1	3	0.796379	0.608854	gi|302141903|emb|CBI19106.3|	unnamed protein product [Vitis vinifera]	gi|123663052|emb|AM452645.1|	Vitis vinifera, whole genome shotgun sequence, contig VV78X209159.4, clone ENTAV 115	-	-	COG0500	SAM-dependent methyltransferases	K10770	vvi:100262638	alkylated DNA repair protein alkB homolog 8 [EC:1.14.11.- 2.1.1.229]	GO:0032259//methylation;GO:0002098//tRNA wobble uridine modification	GO:0008175//tRNA methyltransferase activity	GO:0009507//chloroplast;GO:0005739//mitochondrion
138	CSE_CL3535_Contig1	SW_Unigene15739	+	-	+(Mostly)	1698	0.996	7	3	4	0.495204	0.288492	gi|225459366|ref|XP_002285809.1|	PREDICTED: tRNA modification GTPase MnmE [Vitis vinifera] >gi|302141924|emb|CBI19127.3| unnamed protein product [Vitis vinifera]	gi|359492829|ref|XM_002285773.2|	PREDICTED: Vitis vinifera tRNA modification GTPase MnmE-like (LOC100242149), mRNA	sp|Q9TLX6|MNME_CYACA	Probable tRNA modification GTPase mnmE OS=Cyanidium caldarium GN=mnmE PE=3 SV=1	COG0486	Predicted GTPase	K03650	vvi:100242149	tRNA modification GTPase [EC:3.6.-.-]	GO:0007264//small GTPase mediated signal transduction;GO:0006184//GTP catabolic process;GO:0006897//endocytosis;GO:0006400//tRNA modification	GO:0003924//GTPase activity;GO:0005525//GTP binding	GO:0005737//cytoplasm
139	CSE_CL5375_Contig3	SW_Unigene22325	+	-	+(Mostly)	1578	0.984	25	10	15	0.52965	0.165636	gi|225459083|ref|XP_002283809.1|	PREDICTED: argininosuccinate lyase [Vitis vinifera]	gi|225459082|ref|XM_002283773.1|	PREDICTED: Vitis vinifera argininosuccinate lyase-like (LOC100262660), mRNA	sp|P22675|ARLY_CHLRE	Argininosuccinate lyase OS=Chlamydomonas reinhardtii GN=ARG7 PE=2 SV=2	COG0165	Argininosuccinate lyase	K01755	vvi:100262660	argininosuccinate lyase [EC:4.3.2.1]	GO:0006164//purine nucleotide biosynthetic process;GO:0042450//arginine biosynthetic process via ornithine	GO:0004056//argininosuccinate lyase activity	GO:0009570//chloroplast stroma
140	CSE_Unigene13712	SW_Unigene4911	+	-	+(Mostly)	522	0.996	2	1	1	0.297289	0.354829	gi|225458988|ref|XP_002285581.1|	PREDICTED: ubiquitin-fold modifier-conjugating enzyme 1 [Vitis vinifera] >gi|147816413|emb|CAN77440.1| hypothetical protein VITISV_007403 [Vitis vinifera] >gi|302142114|emb|CBI19317.3| unnamed protein product [Vitis vinifera]	gi|359492987|ref|XM_002285545.2|	PREDICTED: Vitis vinifera ubiquitin-fold modifier-conjugating enzyme 1-like (LOC100264226), mRNA	sp|Q9SXC8|UFC1_ARATH	Ubiquitin-fold modifier-conjugating enzyme 1 OS=Arabidopsis thaliana GN=At1g27530 PE=2 SV=1	-	-	K12165	vvi:100264226	ufm1-conjugating enzyme 1	GO:0009407//toxin catabolic process;GO:0006944//cellular membrane fusion;GO:0016579//protein deubiquitination;GO:0048193//Golgi vesicle transport	GO:0004842//ubiquitin-protein ligase activity	GO:0009507//chloroplast
141	CSE_Unigene8169	SW_Unigene22659	+	-	+(Mostly)	648	0.991	6	3	3	0.361127	0.1955	gi|225458613|ref|XP_002284743.1|	PREDICTED: thioredoxin-like 4, chloroplastic [Vitis vinifera] >gi|302142316|emb|CBI19519.3| unnamed protein product [Vitis vinifera]	gi|359492034|ref|XM_002284707.2|	PREDICTED: Vitis vinifera thioredoxin-like 4, chloroplastic (LOC100267745), mRNA	sp|Q9C5C5|TRL4_ARATH	Thioredoxin-like 4, chloroplastic OS=Arabidopsis thaliana GN=At1g07700 PE=2 SV=1	COG0526	Thiol-disulfide isomerase and thioredoxins	K03671	sbi:SORBI_02g004850	thioredoxin 1	GO:0010264//myo-inositol hexakisphosphate biosynthetic process;GO:0045454//cell redox homeostasis;GO:0006662//glycerol ether metabolic process;GO:0022900//electron transport chain	GO:0009055//electron carrier activity;GO:0015035//protein disulfide oxidoreductase activity	GO:0009570//chloroplast stroma
142	CSE_Unigene12343	SW_Unigene18374	+	-	+(Mostly)	1035	0.994	6	3	3	0.348435	0.183521	gi|225457745|ref|XP_002262900.1|	PREDICTED: uncharacterized protein C57A10.07 [Vitis vinifera] >gi|302142776|emb|CBI19979.3| unnamed protein product [Vitis vinifera]	gi|225457744|ref|XM_002262864.1|	PREDICTED: Vitis vinifera uncharacterized LOC100264380 (LOC100264380), mRNA	-	-	-	-	-	-	-	-	-	-
143	CSE_Unigene13399	SW_Unigene10836	+	-	+(Mostly)	1101	0.991	10	6	4	0.242123	0.0274606	gi|359491937|ref|XP_002274058.2|	PREDICTED: uncharacterized protein LOC100249580 [Vitis vinifera]	gi|359491936|ref|XM_002274022.2|	PREDICTED: Vitis vinifera uncharacterized LOC100249580 (LOC100249580), mRNA	-	-	COG3540	Phosphodiesterase/alkaline phosphatase D	K01113	vvi:100249580	alkaline phosphatase D [EC:3.1.3.1]	-	-	GO:0016023//cytoplasmic membrane-bounded vesicle
144	CSE_Unigene9591	SW_Unigene24075	+	-	+(Mostly)	2103	0.989	21	9	12	0.481333	0.13131	gi|225460702|ref|XP_002267236.1|	PREDICTED: 5&apos;-3&apos; exonuclease-like [Vitis vinifera]	gi|359493097|ref|XM_002267200.2|	PREDICTED: Vitis vinifera 5'-3' exonuclease-like (LOC100250377), mRNA	-	-	COG0258	5'-3' exonuclease (including N-terminal domain of PolI)	K02335	cme:CMT462C	DNA polymerase I [EC:2.7.7.7]	GO:0008152//metabolic process	GO:0008409//5'-3' exonuclease activity;GO:0003677//DNA binding	GO:0005634//nucleus;GO:0009536//plastid
145	CSE_CL4269_Contig2	SW_Unigene17091	+	-	+(Mostly)	666	0.979	8	2	6	1.09754	0.918553	gi|359493583|ref|XP_002263666.2|	PREDICTED: peptide chain release factor 1-like [Vitis vinifera] >gi|297734721|emb|CBI16955.3| unnamed protein product [Vitis vinifera]	gi|359493582|ref|XM_002263630.2|	PREDICTED: Vitis vinifera peptide chain release factor 1-like (LOC100244867), mRNA	-	-	COG1186	Protein chain release factor B	K02836	ppp:PHYPADRAFT_145938	peptide chain release factor 2	GO:0006783//heme biosynthetic process;GO:0006415//translational termination	GO:0003747//translation release factor activity	GO:0009507//chloroplast
146	CSE_CL4317_Contig1	SW_CL6969_Contig2	+	-	+(Mostly)	1011	0.994	6	2	4	0.578428	0.405474	gi|297735981|emb|CBI23955.3|	unnamed protein product [Vitis vinifera]	gi|359494022|ref|XM_002281433.2|	PREDICTED: Vitis vinifera F-box protein At3g62230-like (LOC100250424), mRNA	-	-	-	-	K03098	gmx:100500117	outer membrane lipoprotein Blc	GO:0006979//response to oxidative stress	-	GO:0009535//chloroplast thylakoid membrane;GO:0031977//thylakoid lumen
147	CSE_CL7552_Contig2	SW_Unigene23309	+	-	+(Mostly)	1053	0.995	5	2	3	0.455914	0.331868	gi|225461681|ref|XP_002285464.1|	PREDICTED: uncharacterized protein LOC100243613 [Vitis vinifera] >gi|302142893|emb|CBI20188.3| unnamed protein product [Vitis vinifera]	gi|225461680|ref|XM_002285428.1|	PREDICTED: Vitis vinifera uncharacterized LOC100243613 (LOC100243613), mRNA	sp|Q84JE8|ZDP_ARATH	Polynucleotide 3'-phosphatase ZDP OS=Arabidopsis thaliana GN=ZDP PE=1 SV=1	COG0241	Histidinol phosphatase and related phosphatases	K08073	vvi:100243613	bifunctional polynucleotide phosphatase/kinase [EC:3.1.3.32 2.7.1.78]	GO:0006261//DNA-dependent DNA replication	GO:0003677//DNA binding;GO:0016787//hydrolase activity;GO:0008270//zinc ion binding	GO:0005634//nucleus
148	CSE_Unigene12717	SW_Unigene21691	+	-	+(Mostly)	546	0.996	2	1	1	0.388134	0.404211	gi|225461526|ref|XP_002285149.1|	PREDICTED: 30S ribosomal protein S20, chloroplastic [Vitis vinifera] >gi|302142967|emb|CBI20262.3| unnamed protein product [Vitis vinifera]	gi|359493825|ref|XM_002285113.2|	PREDICTED: Vitis vinifera 30S ribosomal protein S20, chloroplastic-like (LOC100265925), mRNA	sp|Q9ASV6|RR20_ARATH	30S ribosomal protein S20, chloroplastic OS=Arabidopsis thaliana GN=RPS20 PE=1 SV=1	COG0268	Ribosomal protein S20	K02968	vvi:100265925	small subunit ribosomal protein S20	GO:0006412//translation;GO:0006364//rRNA processing;GO:0015995//chlorophyll biosynthetic process	GO:0003723//RNA binding;GO:0003735//structural constituent of ribosome	GO:0005840//ribosome;GO:0009941//chloroplast envelope;GO:0009570//chloroplast stroma;GO:0016020//membrane
149	CSE_Unigene16412	SW_CL4385_Contig1	+	-	+(Mostly)	978	0.984	7	5	2	0.137419	0.0144303	gi|225461498|ref|XP_002285093.1|	PREDICTED: 3-hydroxybutyryl-CoA dehydrogenase [Vitis vinifera] >gi|302142978|emb|CBI20273.3| unnamed protein product [Vitis vinifera]	gi|359493832|ref|XM_002285057.2|	PREDICTED: Vitis vinifera 3-hydroxybutyryl-CoA dehydrogenase-like (LOC100246999), mRNA	sp|Q9ZPI6|AIM1_ARATH	Peroxisomal fatty acid beta-oxidation multifunctional protein AIM1 OS=Arabidopsis thaliana GN=AIM1 PE=1 SV=1	COG1250	3-hydroxyacyl-CoA dehydrogenase	K00074	vvi:100246999	3-hydroxybutyryl-CoA dehydrogenase [EC:1.1.1.157]	GO:0006631//fatty acid metabolic process;GO:0055114//oxidation-reduction process;GO:0006944//cellular membrane fusion;GO:0048193//Golgi vesicle transport;GO:0046685//response to arsenic-containing substance;GO:0009853//photorespiration	GO:0008691//3-hydroxybutyryl-CoA dehydrogenase activity;GO:0070403//NAD+ binding;GO:0003857//3-hydroxyacyl-CoA dehydrogenase activity	GO:0005777//peroxisome
150	CSE_CL5879_Contig2	SW_CL7812_Contig3	+	-	+(Mostly)	963	0.991	9	6	3	0.145282	0.0059456	gi|225461477|ref|XP_002282453.1|	PREDICTED: putative RNA-binding protein ylmH [Vitis vinifera] >gi|302142996|emb|CBI20291.3| unnamed protein product [Vitis vinifera]	gi|47105537|gb|BT014122.1|	Lycopersicon esculentum clone 133228R, mRNA sequence	-	-	COG2302	Uncharacterized conserved protein, contains S4-like domain	-	-	-	-	GO:0003723//RNA binding	GO:0005739//mitochondrion;GO:0009507//chloroplast
151	CSE_Unigene14271	SW_Unigene6729	+	-	+(Mostly)	600	0.992	5	4	1	0.0841859	0.0154081	gi|302143191|emb|CBI20486.3|	unnamed protein product [Vitis vinifera]	gi|359493938|ref|XM_002282853.2|	PREDICTED: Vitis vinifera 50S ribosomal protein L24, chloroplastic-like, transcript variant 1 (LOC100250357), mRNA	sp|Q02764|RK24_TOBAC	50S ribosomal protein L24, chloroplastic OS=Nicotiana tabacum GN=RPL24 PE=1 SV=1	COG0198	Ribosomal protein L24	K02895	vvi:100250357	large subunit ribosomal protein L24	GO:0032544//plastid translation;GO:0019288//isopentenyl diphosphate biosynthetic process, mevalonate-independent pathway	GO:0003723//RNA binding;GO:0003735//structural constituent of ribosome	GO:0009941//chloroplast envelope;GO:0015934//large ribosomal subunit;GO:0009570//chloroplast stroma
152	CSE_CL2766_Contig2	SW_CL1205_Contig8	+	-	+(Mostly)	627	0.987	8	2	6	0.687556	0.459419	gi|296089975|emb|CBI39794.3|	unnamed protein product [Vitis vinifera]	gi|225462014|ref|XM_002267790.1|	PREDICTED: Vitis vinifera probable peptidyl-prolyl cis-trans isomerase C27F1.06c-like (LOC100261657), mRNA	sp|Q944B0|FK161_ARATH	Peptidyl-prolyl cis-trans isomerase FKBP16-1, chloroplastic OS=Arabidopsis thaliana GN=FKBP16-1 PE=2 SV=1	COG0545	FKBP-type peptidyl-prolyl cis-trans isomerases 1	K14826	osa:4335968	FK506-binding nuclear protein [EC:5.2.1.8]	GO:0006457//protein folding;GO:0000412//histone peptidyl-prolyl isomerization	GO:0005528//FK506 binding;GO:0003755//peptidyl-prolyl cis-trans isomerase activity	GO:0005730//nucleolus;GO:0009507//chloroplast;GO:0016020//membrane
153	CSE_Unigene5309	SW_Unigene24457	+	-	+(Strictly)	729	0.993	5	3	2	0.21702	0.0989727	gi|225428570|ref|XP_002281086.1|	PREDICTED: endothelin-converting enzyme 2 [Vitis vinifera] >gi|297741411|emb|CBI32542.3| unnamed protein product [Vitis vinifera]	gi|359475258|ref|XM_002281050.2|	PREDICTED: Vitis vinifera endothelin-converting enzyme 2-like (LOC100260707), mRNA	-	-	COG0500	SAM-dependent methyltransferases	-	-	-	GO:0032259//methylation;GO:0006508//proteolysis	GO:0008168//methyltransferase activity;GO:0008233//peptidase activity	GO:0005794//Golgi apparatus
154	CSE_Unigene11004	SW_CL4611_Contig1	+	-	+(Strictly)	726	0.997	2	2	NA	0	NA	gi|225432226|ref|XP_002270283.1|	PREDICTED: chromatin structure-remodeling complex protein BSH [Vitis vinifera] >gi|297736833|emb|CBI26034.3| unnamed protein product [Vitis vinifera]	gi|225432225|ref|XM_002270247.1|	PREDICTED: Vitis vinifera chromatin structure-remodeling complex protein BSH-like (LOC100249448), mRNA	sp|P93045|BSH_ARATH	Chromatin structure-remodeling complex protein BSH OS=Arabidopsis thaliana GN=BSH PE=1 SV=2	-	-	K11648	vvi:100249448	SWI/SNF-related matrix-associated actin-dependent regulator of chromatin subfamily B member 1	GO:0040029//regulation of gene expression, epigenetic;GO:0006338//chromatin remodeling	GO:0003682//chromatin binding;GO:0005515//protein binding	GO:0000228//nuclear chromosome
155	CSE_CL1564_Contig9	SW_CL2446_Contig2	+	-	+(Strictly)	624	0.997	2	NA	2	NA	NA	gi|225435072|ref|XP_002284406.1|	PREDICTED: 3-hydroxyacyl-CoA dehydratase 2 [Vitis vinifera] >gi|297746135|emb|CBI16191.3| unnamed protein product [Vitis vinifera]	gi|359479001|ref|XM_002284370.2|	PREDICTED: Vitis vinifera 3-hydroxyacyl-CoA dehydratase 2-like (LOC100255240), mRNA	sp|Q8VZB2|PAS2_ARATH	Very-long-chain (3R)-3-hydroxyacyl-[acyl-carrier protein] dehydratase PASTICCINO 2 OS=Arabidopsis thaliana GN=PAS2 PE=1 SV=1	COG5198	Protein tyrosine phosphatase-like protein (contains Pro instead of catalytic Arg)	K10703	sbi:SORBI_09g022630	3-hydroxy acyl-CoA dehydratase [EC:4.2.1.-]	-	-	-
156	CSE_CL3642_Contig3	SW_CL1107_Contig3	+	-	+(Strictly)	693	0.991	6	4	2	0.15631	0.0323656	gi|225435864|ref|XP_002265488.1|	PREDICTED: methyltransferase-like protein 22-like [Vitis vinifera]	gi|359479281|ref|XM_002265452.2|	PREDICTED: Vitis vinifera methyltransferase-like protein 22-like (LOC100251275), mRNA	-	-	COG3897	Predicted methyltransferase	-	-	-	GO:0032259//methylation	GO:0008168//methyltransferase activity	GO:0005737//cytoplasm
157	CSE_Unigene10468	SW_Unigene12688	+	-	+(Strictly)	678	0.994	4	NA	4	NA	NA	gi|225440598|ref|XP_002277660.1|	PREDICTED: uncharacterized protein LOC100244154 isoform 1 [Vitis vinifera] >gi|297740254|emb|CBI30436.3| unnamed protein product [Vitis vinifera]	gi|359481690|ref|XM_002277624.2|	PREDICTED: Vitis vinifera uncharacterized LOC100244154, transcript variant 1 (LOC100244154), mRNA	sp|Q8LBZ4|OTU_ARATH	OTU domain-containing protein At3g57810 OS=Arabidopsis thaliana GN=At3g57810 PE=2 SV=1	-	-	-	-	-	GO:0006508//proteolysis	GO:0008233//peptidase activity	GO:0005737//cytoplasm
158	CSE_CL3505_Contig4	SW_Unigene7567	+	-	+(Strictly)	882	0.992	7	3	4	0.441551	0.242368	gi|225444205|ref|XP_002270834.1|	PREDICTED: ribose-5-phosphate isomerase A [Vitis vinifera] >gi|296089229|emb|CBI39001.3| unnamed protein product [Vitis vinifera]	gi|359483979|ref|XM_002270798.2|	PREDICTED: Vitis vinifera ribose-5-phosphate isomerase A-like (LOC100240835), mRNA	sp|Q9ZU38|RPIA_ARATH	Probable ribose-5-phosphate isomerase OS=Arabidopsis thaliana GN=At2g01290 PE=2 SV=1	COG0120	Ribose 5-phosphate isomerase	K01807	vvi:100240835	ribose 5-phosphate isomerase A [EC:5.3.1.6]	GO:0016556//mRNA modification;GO:0009052//pentose-phosphate shunt, non-oxidative branch	GO:0004751//ribose-5-phosphate isomerase activity	GO:0009507//chloroplast
159	CSE_Unigene13239	SW_Unigene13675	+	-	+(Strictly)	585	0.993	4	1	3	0.958056	0.667774	gi|225447610|ref|XP_002273149.1|	PREDICTED: N-acetyltransferase 9-like protein [Vitis vinifera] >gi|296084990|emb|CBI28405.3| unnamed protein product [Vitis vinifera]	gi|359485875|ref|XM_002273113.2|	PREDICTED: Vitis vinifera N-acetyltransferase 9-like protein (LOC100240921), mRNA	-	-	COG1670	Acetyltransferases, including N-acetylases of ribosomal proteins	-	-	-	GO:0008152//metabolic process	GO:0008080//N-acetyltransferase activity	-
160	CSE_Unigene14835	SW_Unigene22968	+	-	+(Strictly)	2691	0.996	10	7	3	0.146509	0.00399737	gi|225449044|ref|XP_002274159.1|	PREDICTED: endoplasmic reticulum metallopeptidase 1 [Vitis vinifera] >gi|296086015|emb|CBI31456.3| unnamed protein product [Vitis vinifera]	gi|225449043|ref|XM_002274123.1|	PREDICTED: Vitis vinifera endoplasmic reticulum metallopeptidase 1-like (LOC100266752), mRNA	-	-	COG2234	Predicted aminopeptidases	-	-	-	GO:0006508//proteolysis	GO:0008233//peptidase activity	GO:0016020//membrane;GO:0005783//endoplasmic reticulum
161	CSE_Unigene16250	SW_Unigene6646	+	-	+(Strictly)	1320	0.986	15	7	8	0.374514	0.0537813	gi|225449224|ref|XP_002276243.1|	PREDICTED: uncharacterized protein At2g39910 [Vitis vinifera] >gi|296086104|emb|CBI31545.3| unnamed protein product [Vitis vinifera]	gi|225449223|ref|XM_002276207.1|	PREDICTED: Vitis vinifera uncharacterized LOC100261631 (LOC100261631), mRNA	sp|Q8GXP4|Y2991_ARATH	Uncharacterized protein At2g39910 OS=Arabidopsis thaliana GN=At2g39910 PE=2 SV=2	-	-	-	-	-	-	-	GO:0005634//nucleus
162	CSE_Unigene12912	SW_CL2846_Contig1	+	-	+(Strictly)	876	0.997	3	1	2	0.715696	0.583134	gi|297741104|emb|CBI31835.3|	unnamed protein product [Vitis vinifera]	gi|359490402|ref|XM_002274611.2|	PREDICTED: Vitis vinifera uncharacterized LOC100252183 (LOC100252183), mRNA	-	-	-	-	-	-	-	GO:0010190//cytochrome b6f complex assembly;GO:0010207//photosystem II assembly	-	GO:0009507//chloroplast
163	CSE_CL7223_Contig1	SW_Unigene22890	+	-	+(Strictly)	1149	0.978	13	6	7	0.404093	0.0925247	gi|225459882|ref|XP_002262834.1|	PREDICTED: uncharacterized protein LOC100244872 isoform 1 [Vitis vinifera] >gi|297734717|emb|CBI16951.3| unnamed protein product [Vitis vinifera]	gi|225459881|ref|XM_002262798.1|	PREDICTED: Vitis vinifera 2-hydroxy-6-oxononadienedioate/2-hydroxy-6- oxononatrienedioate hydrolase-like, transcript variant 1 (LOC100244872), mRNA	-	-	COG0596	Predicted hydrolases or acyltransferases (alpha/beta hydrolase superfamily)	K14759	bdi:100843372	isochorismate synthase / 2-succinyl-5-enolpyruvyl-6-hydroxy-3-cyclohexene-1-carboxylate synthase / 2-succinyl-6-hydroxy-2,4-cyclohexadiene-1-carboxylate synthase / O-succinylbenzoate synthase [EC:5.4.4.2 2.2.1.9 4.2.99.20 4.2.1.113]	GO:0010264//myo-inositol hexakisphosphate biosynthetic process;GO:0006364//rRNA processing;GO:0009657//plastid organization;GO:0010207//photosystem II assembly;GO:0019761//glucosinolate biosynthetic process;GO:0043085//positive regulation of catalytic activity	GO:0016787//hydrolase activity	GO:0009941//chloroplast envelope;GO:0009534//chloroplast thylakoid
164	CSE_Unigene15711	SW_CL8050_Contig1	-	+	+(Mostly)	984	0.994	6	5	1	0.0792969	0.0081319	gi|359497266|ref|XP_002268717.2|	PREDICTED: UDP-N-acetylglucosamine transporter-like [Vitis vinifera] >gi|296084745|emb|CBI25889.3| unnamed protein product [Vitis vinifera]	gi|359497265|ref|XM_002268681.2|	PREDICTED: Vitis vinifera UDP-N-acetylglucosamine transporter-like (LOC100264881), mRNA	sp|Q8LES0|CSTR5_ARATH	CMP-sialic acid transporter 5 OS=Arabidopsis thaliana GN=At5g65000 PE=2 SV=1	COG0697	Permeases of the drug/metabolite transporter (DMT) superfamily	K15272	vvi:100264881	solute carrier family 35 (UDP-sugar transporter), member A1/2/3	GO:0055085//transmembrane transport;GO:0010584//pollen exine formation;GO:0008643//carbohydrate transport;GO:0015780//nucleotide-sugar transport	GO:0005351//sugar:hydrogen symporter activity;GO:0005338//nucleotide-sugar transmembrane transporter activity	GO:0016021//integral to membrane;GO:0000139//Golgi membrane;GO:0009507//chloroplast
165	CSE_Unigene20951	SW_Unigene20936	-	+	+(Mostly)	975	0.993	7	4	3	0.281327	0.094569	gi|147777809|emb|CAN64607.1|	hypothetical protein VITISV_030583 [Vitis vinifera]	gi|359496913|ref|XM_002265151.2|	PREDICTED: Vitis vinifera protein SGT1 homolog At5g65490-like (LOC100242690), mRNA	sp|Q9LSM5|SGT1_ARATH	Protein SGT1 homolog At5g65490 OS=Arabidopsis thaliana GN=At5g65490 PE=2 SV=1	-	-	-	-	-	-	-	GO:0009507//chloroplast
166	CSE_Unigene11338	SW_Unigene7652	-	+	+(Mostly)	1455	0.993	4	2	2	0.371942	0.293063	gi|225424368|ref|XP_002281246.1|	PREDICTED: histone-lysine N-methyltransferase setd3 [Vitis vinifera] >gi|297737636|emb|CBI26837.3| unnamed protein product [Vitis vinifera]	gi|349725821|emb|FQ393773.1|	Vitis vinifera clone SS0AFA24YF01	sp|Q9XI84|RBCMT_ARATH	[Fructose-bisphosphate aldolase]-lysine N-methyltransferase, chloroplastic OS=Arabidopsis thaliana GN=LSMT-L PE=1 SV=1	-	-	K00592	aly:ARALYDRAFT_471564	[ribulose-bisphosphate carboxylase]-lysine N-methyltransferase [EC:2.1.1.127]	-	-	GO:0009507//chloroplast
167	CSE_Unigene11353	SW_Unigene22015	-	+	+(Mostly)	534	0.993	4	2	2	0.363514	0.286837	gi|225424772|ref|XP_002269008.1|	PREDICTED: uncharacterized protein LOC100267269 [Vitis vinifera]	gi|225424771|ref|XM_002268972.1|	PREDICTED: Vitis vinifera uncharacterized LOC100267269 (LOC100267269), mRNA	-	-	-	-	-	-	-	-	-	-
168	CSE_Unigene15975	SW_Unigene18368	-	+	+(Mostly)	2319	0.995	11	10	1	0.0256129	1.13331e-06	gi|359473966|ref|XP_002272937.2|	PREDICTED: N6-adenosine-methyltransferase MT-A70-like [Vitis vinifera]	gi|359473965|ref|XM_002272901.2|	PREDICTED: Vitis vinifera N6-adenosine-methyltransferase MT-A70-like (LOC100256414), mRNA	sp|O82486|MTA70_ARATH	N6-adenosine-methyltransferase MT-A70-like OS=Arabidopsis thaliana GN=EMB1706 PE=1 SV=2	COG4725	Transcriptional activator, adenine-specific DNA methyltransferase	K05925	osa:4330284	mRNA (2'-O-methyladenosine-N6-)-methyltransferase [EC:2.1.1.62]	GO:0080009//mRNA methylation;GO:0009793//embryo development ending in seed dormancy	GO:0016422//mRNA (2'-O-methyladenosine-N6-)-methyltransferase activity;GO:0005515//protein binding	GO:0016607//nuclear speck;GO:0009507//chloroplast
169	CSE_Unigene17419	SW_CL7935_Contig1	-	+	+(Mostly)	945	0.993	7	3	4	0.278802	0.105883	gi|225428055|ref|XP_002279493.1|	PREDICTED: pre-mRNA-splicing factor syf2 isoform 1 [Vitis vinifera] >gi|297744598|emb|CBI37860.3| unnamed protein product [Vitis vinifera]	gi|225428054|ref|XM_002279457.1|	PREDICTED: Vitis vinifera pre-mRNA-splicing factor syf2-like, transcript variant 1 (LOC100252114), mRNA	-	-	-	-	K12868	vvi:100252114	pre-mRNA-splicing factor SYF2	-	-	GO:0009536//plastid
170	CSE_Unigene15967	SW_Unigene15969	-	+	+(Mostly)	1131	0.991	10	8	2	0.0853341	0.000499638	gi|359475308|ref|XP_003631647.1|	PREDICTED: guanine nucleotide-binding protein subunit beta-2-like [Vitis vinifera] >gi|297741450|emb|CBI32581.3| unnamed protein product [Vitis vinifera]	gi|349705910|emb|FQ384449.1|	Vitis vinifera clone SS0AAG1YH18	sp|P93563|GBB_SOLTU	Guanine nucleotide-binding protein subunit beta OS=Solanum tuberosum GN=GB1 PE=2 SV=1	COG2319	FOG: WD40 repeat	K04536	vvi:100853292	guanine nucleotide-binding protein G(I)/G(S)/G(T) subunit beta-1	GO:0009845//seed germination;GO:0009867//jasmonic acid mediated signaling pathway;GO:0010154//fruit development;GO:0009887//organ morphogenesis;GO:0030968//endoplasmic reticulum unfolded protein response;GO:0009817//defense response to fungus, incompatible interaction;GO:0048527//lateral root development;GO:0016573//histone acetylation;GO:0009723//response to ethylene stimulus;GO:0007186//G-prote…	GO:0004402//histone acetyltransferase activity	GO:0080008//Cul4-RING ubiquitin ligase complex;GO:0005783//endoplasmic reticulum;GO:0005886//plasma membrane
171	CSE_Unigene20150	SW_Unigene20418	-	+	+(Mostly)	873	0.993	6	3	3	0.251807	0.101238	gi|359475871|ref|XP_002285449.2|	PREDICTED: protein MEMO1-like [Vitis vinifera] >gi|296082111|emb|CBI21116.3| unnamed protein product [Vitis vinifera]	gi|359475870|ref|XM_002285413.2|	PREDICTED: Vitis vinifera protein MEMO1-like (LOC100256144), mRNA	-	-	COG1355	Predicted dioxygenase	K06990	vvi:100256144		-	-	GO:0005634//nucleus
172	CSE_Unigene1448	SW_CL8476_Contig1	-	+	+(Mostly)	810	0.996	3	1	2	0.653315	0.557813	gi|147790065|emb|CAN75987.1|	hypothetical protein VITISV_012192 [Vitis vinifera]	gi|359477499|ref|XM_002277809.2|	PREDICTED: Vitis vinifera uncharacterized LOC100242495, transcript variant 1 (LOC100242495), mRNA	-	-	COG2106	Uncharacterized conserved protein	K09142	vvi:100242495	hypothetical protein	GO:0006626//protein targeting to mitochondrion;GO:0009560//embryo sac egg cell differentiation;GO:0000741//karyogamy	-	GO:0005634//nucleus
173	CSE_Unigene14967	SW_CL1646_Contig1	-	+	+(Mostly)	1377	0.993	10	8	2	0.0891649	0.000623643	gi|225434411|ref|XP_002271596.1|	PREDICTED: 28S ribosomal protein S29, mitochondrial [Vitis vinifera] >gi|297745805|emb|CBI15861.3| unnamed protein product [Vitis vinifera]	gi|359478507|ref|XM_002271560.2|	PREDICTED: Vitis vinifera mitochondrial 28S ribosomal protein S29-like (LOC100262146), mRNA	sp|Q9LK03|PERK2_ARATH	Proline-rich receptor-like protein kinase PERK2 OS=Arabidopsis thaliana GN=PERK2 PE=2 SV=3	-	-	-	-	-	GO:0009220//pyrimidine ribonucleotide biosynthetic process;GO:0006164//purine nucleotide biosynthetic process	-	GO:0005739//mitochondrion
174	CSE_Unigene15421	SW_Unigene13418	-	+	+(Mostly)	1842	0.995	9	4	5	0.365266	0.0327234	gi|225435323|ref|XP_002285170.1|	PREDICTED: vacuolar fusion protein MON1 homolog A [Vitis vinifera] >gi|297746260|emb|CBI16316.3| unnamed protein product [Vitis vinifera]	gi|225435322|ref|XM_002285134.1|	PREDICTED: Vitis vinifera SAND family (SAND), mRNA	-	-	-	-	-	-	-	GO:0006882//cellular zinc ion homeostasis;GO:0009624//response to nematode;GO:0006816//calcium ion transport	-	GO:0005634//nucleus
175	CSE_Unigene15566	SW_Unigene12430	-	+	+(Mostly)	663	0.994	4	2	2	0.340721	0.26594	gi|225435454|ref|XP_002285453.1|	PREDICTED: probable 3-beta-hydroxysteroid-Delta(8),Delta(7)-isomerase isoform 2 [Vitis vinifera] >gi|225435456|ref|XP_002285450.1| PREDICTED: probable 3-beta-hydroxysteroid-Delta(8),Delta(7)-isomerase isoform 1 [Vitis vinifera] >gi|297746323|emb|CBI16379.3| unnamed protein product [Vitis vinifera]	gi|359478384|ref|XM_002285417.2|	PREDICTED: Vitis vinifera probable 3-beta-hydroxysteroid-Delta(8),Delta(7)-isomerase-like, transcript variant 2 (LOC100263963), mRNA	sp|O48962|EBP_ARATH	Probable 3-beta-hydroxysteroid-Delta(8),Delta(7)-isomerase OS=Arabidopsis thaliana GN=At1g20050 PE=2 SV=1	-	-	K01824	vvi:100263963	cholestenol delta-isomerase [EC:5.3.3.5]	GO:0016132//brassinosteroid biosynthetic process;GO:0019932//second-messenger-mediated signaling;GO:0006084//acetyl-CoA metabolic process;GO:0060964//regulation of gene silencing by miRNA;GO:0016126//sterol biosynthetic process	GO:0047750//cholestenol delta-isomerase activity;GO:0000247//C-8 sterol isomerase activity	GO:0016021//integral to membrane;GO:0005783//endoplasmic reticulum;GO:0005886//plasma membrane
176	CSE_Unigene19808	SW_Unigene6379	-	+	+(Mostly)	2598	0.995	12	9	3	0.11327	0.000456971	gi|359479295|ref|XP_003632252.1|	PREDICTED: nuclear cap-binding protein subunit 1-like isoform 2 [Vitis vinifera] >gi|296083820|emb|CBI24208.3| unnamed protein product [Vitis vinifera]	gi|359479294|ref|XM_003632204.1|	PREDICTED: Vitis vinifera nuclear cap-binding protein subunit 1-like, transcript variant 2 (LOC100265341), mRNA	sp|Q9SIU2|NCBP1_ARATH	Nuclear cap-binding protein subunit 1 OS=Arabidopsis thaliana GN=ABH1 PE=1 SV=2	-	-	K12882	vvi:100265341	nuclear cap-binding protein subunit 1	GO:0000394//RNA splicing, via endonucleolytic cleavage and ligation;GO:0000226//microtubule cytoskeleton organization;GO:0051028//mRNA transport;GO:0050826//response to freezing;GO:0006366//transcription from RNA polymerase II promoter;GO:0009793//embryo development ending in seed dormancy;GO:0000911//cytokinesis by cell plate formation;GO:0051567//histone H3-K9 methylation;GO:0031053//primary mi…	GO:0005515//protein binding;GO:0003677//DNA binding;GO:0000339//RNA cap binding	GO:0005829//cytosol;GO:0005846//nuclear cap binding complex;GO:0005634//nucleus
177	CSE_Unigene14644	SW_Unigene14551	-	+	+(Mostly)	1614	0.988	19	10	9	0.38259	0.0410722	gi|147799196|emb|CAN65774.1|	hypothetical protein VITISV_030411 [Vitis vinifera]	gi|225441111|ref|XM_002264904.1|	PREDICTED: Vitis vinifera probable allantoin permease-like (LOC100253862), mRNA	-	-	COG1953	Cytosine/uracil/thiamine/allantoin permeases	K03457	ath:AT5G03555	nucleobase:cation symporter-1, NCS1 family	GO:0009411//response to UV;GO:0015851//nucleobase transport;GO:0009813//flavonoid biosynthetic process;GO:0015931//nucleobase-containing compound transport;GO:0043100//pyrimidine nucleobase salvage	GO:0015205//nucleobase transmembrane transporter activity	GO:0009526//plastid envelope;GO:0009507//chloroplast;GO:0016020//membrane
178	CSE_Unigene12024	SW_CL1508_Contig2	-	+	+(Mostly)	600	0.985	6	3	3	0.333471	0.171336	gi|225441096|ref|XP_002263825.1|	PREDICTED: dnaJ homolog subfamily C member 28 [Vitis vinifera]	gi|225441095|ref|XM_002263789.1|	PREDICTED: Vitis vinifera dnaJ homolog subfamily C member 28-like (LOC100241894), mRNA	-	-	-	-	K03457	osa:4346324	nucleobase:cation symporter-1, NCS1 family	GO:0015931//nucleobase-containing compound transport	GO:0015391//nucleobase:cation symporter activity	GO:0009507//chloroplast
179	CSE_CL3116_Contig1	SW_Unigene18163	-	+	+(Mostly)	3807	0.992	30	25	5	0.0592006	4.64217e-12	gi|225440310|ref|XP_002262987.1|	PREDICTED: 5-oxoprolinase-like [Vitis vinifera]	gi|123656047|emb|AM433445.1|	Vitis vinifera, whole genome shotgun sequence, contig VV78X008328.5, clone ENTAV 115	sp|Q9FIZ7|OPLA_ARATH	5-oxoprolinase OS=Arabidopsis thaliana GN=OXP1 PE=2 SV=1	COG0145	N-methylhydantoinase A/acetone carboxylase, beta subunit	K01469	vvi:100252923	5-oxoprolinase (ATP-hydrolysing) [EC:3.5.2.9]	GO:0006751//glutathione catabolic process	GO:0017168//5-oxoprolinase (ATP-hydrolyzing) activity	GO:0009506//plasmodesma;GO:0005829//cytosol
180	CSE_Unigene18065	SW_Unigene6792	-	+	+(Mostly)	4626	0.997	12	9	3	0.129339	0.000978452	gi|359484532|ref|XP_002280317.2|	PREDICTED: phosphoinositide 3-kinase regulatory subunit 4-like [Vitis vinifera]	gi|123664181|emb|AM469857.1|	Vitis vinifera, whole genome shotgun sequence, contig VV78X244903.14, clone ENTAV 115	sp|P0C8M8|CCR1_MAIZE	Probable serine/threonine-protein kinase CCRP1 OS=Zea mays GN=CCRP1 PE=1 SV=1	COG0515	Serine/threonine protein kinase	K08333	vvi:100256057	phosphoinositide-3-kinase, regulatory subunit 4, p150 [EC:2.7.11.1]	GO:0009630//gravitropism;GO:0006635//fatty acid beta-oxidation;GO:0006891//intra-Golgi vesicle-mediated transport;GO:0006869//lipid transport;GO:0010351//lithium ion transport;GO:0009873//ethylene mediated signaling pathway;GO:0016558//protein import into peroxisome matrix;GO:0048573//photoperiodism, flowering;GO:0009846//pollen germination;GO:0006468//protein phosphorylation;GO:0000303//response…	GO:0004674//protein serine/threonine kinase activity;GO:0005524//ATP binding	GO:0080008//Cul4-RING ubiquitin ligase complex;GO:0005794//Golgi apparatus
181	CSE_Unigene255	SW_Unigene22860	-	+	+(Mostly)	3147	0.996	14	9	5	0.199246	0.00331004	gi|225445228|ref|XP_002280942.1|	PREDICTED: membrane-bound transcription factor site-1 protease [Vitis vinifera]	gi|225445227|ref|XM_002280906.1|	PREDICTED: Vitis vinifera membrane-bound transcription factor peptidase, site 1 (MBTPS1), mRNA	-	-	COG1404	Subtilisin-like serine proteases	K08653	vvi:100264570	membrane-bound transcription factor site-1 protease [EC:3.4.21.112]	GO:0006629//lipid metabolic process;GO:0042538//hyperosmotic salinity response;GO:0006508//proteolysis;GO:0006486//protein glycosylation;GO:0006888//ER to Golgi vesicle-mediated transport	GO:0004252//serine-type endopeptidase activity	GO:0005576//extracellular region;GO:0005783//endoplasmic reticulum;GO:0005794//Golgi apparatus
182	CSE_Unigene13909	SW_Unigene15920	-	+	+(Mostly)	558	0.993	4	2	2	0.307272	0.235383	gi|225445569|ref|XP_002282316.1|	PREDICTED: elongation factor Ts, mitochondrial [Vitis vinifera] >gi|297738982|emb|CBI28227.3| unnamed protein product [Vitis vinifera]	gi|225445568|ref|XM_002282280.1|	PREDICTED: Vitis vinifera elongation factor Ts, mitochondrial-like (LOC100259510), mRNA	sp|B9SEZ6|EFTS_RICCO	Elongation factor Ts, mitochondrial OS=Ricinus communis GN=EFTS PE=3 SV=1	COG0264	Translation elongation factor Ts	K02357	smo:SELMODRAFT_60716	elongation factor Ts	GO:0006414//translational elongation	GO:0003746//translation elongation factor activity	GO:0005739//mitochondrion
183	CSE_Unigene17184	SW_Unigene13904	-	+	+(Mostly)	969	0.998	2	1	1	0.306988	0.360159	gi|225445652|ref|XP_002265472.1|	PREDICTED: proteasomal ubiquitin receptor ADRM1 [Vitis vinifera] >gi|297736028|emb|CBI24066.3| unnamed protein product [Vitis vinifera]	gi|359484920|ref|XM_002265436.2|	PREDICTED: Vitis vinifera proteasomal ubiquitin receptor ADRM1-like (LOC100250036), mRNA	-	-	-	-	-	-	-	GO:0006499//N-terminal protein myristoylation;GO:0007155//cell adhesion;GO:0051604//protein maturation;GO:0009640//photomorphogenesis;GO:0010388//cullin deneddylation	GO:0000166//nucleotide binding	GO:0005737//cytoplasm;GO:0016021//integral to membrane;GO:0005634//nucleus
184	CSE_Unigene15386	SW_Unigene22243	-	+	+(Mostly)	927	0.985	14	7	7	0.426513	0.132361	gi|225465835|ref|XP_002264402.1|	PREDICTED: U-box domain-containing protein 4 [Vitis vinifera]	gi|359487144|ref|XM_002264366.2|	PREDICTED: Vitis vinifera U-box domain-containing protein 4-like (LOC100249738), mRNA	sp|O22193|PUB4_ARATH	U-box domain-containing protein 4 OS=Arabidopsis thaliana GN=PUB4 PE=1 SV=3	-	-	K14431	aly:ARALYDRAFT_311885	transcription factor TGA	-	GO:0016874//ligase activity	GO:0005739//mitochondrion
185	CSE_Unigene19309	SW_Unigene16735	-	+	+(Mostly)	1281	0.991	9	4	5	0.453534	0.198925	gi|225454194|ref|XP_002273844.1|	PREDICTED: UPF0187 protein At3g61320, chloroplastic [Vitis vinifera]	gi|359489594|ref|XM_002273808.2|	PREDICTED: Vitis vinifera uncharacterized LOC100251611 (LOC100251611), mRNA	sp|Q9M2D2|YU88_ARATH	UPF0187 protein At3g61320, chloroplastic OS=Arabidopsis thaliana GN=At3g61320 PE=2 SV=2	COG3781	Predicted membrane protein	K08994	ota:Ot16g02730	putative membrane protein	GO:0048449//floral organ formation;GO:0016570//histone modification;GO:0009909//regulation of flower development	-	GO:0009507//chloroplast
186	CSE_Unigene12658	SW_Unigene5359	-	+	+(Mostly)	1542	0.993	11	9	2	0.061063	3.79395e-05	gi|225456944|ref|XP_002281533.1|	PREDICTED: WD40 repeat-containing protein SMU1 [Vitis vinifera] >gi|297733734|emb|CBI14981.3| unnamed protein product [Vitis vinifera]	gi|225456943|ref|XM_002281497.1|	PREDICTED: Vitis vinifera WD40 repeat-containing protein SMU1-like (LOC100241550), mRNA	sp|Q3Y8L7|WDR69_CHLRE	Outer row dynein assembly protein 16 OS=Chlamydomonas reinhardtii GN=ODA16 PE=1 SV=1	COG2319	FOG: WD40 repeat	K13111	vvi:100241550	WD40 repeat-containing protein SMU1	GO:0008380//RNA splicing	GO:0016905//myosin heavy chain kinase activity;GO:0000166//nucleotide binding	GO:0005634//nucleus;GO:0080008//Cul4-RING ubiquitin ligase complex
187	CSE_Unigene17385	SW_Unigene16042	-	+	+(Mostly)	1263	0.991	11	4	7	0.572665	0.267559	gi|225456230|ref|XP_002283095.1|	PREDICTED: NAD-dependent dihydropyrimidine dehydrogenase subunit PreA [Vitis vinifera]	gi|225456229|ref|XM_002283059.1|	PREDICTED: Vitis vinifera NAD-dependent dihydropyrimidine dehydrogenase subunit PreA-like (LOC100249021), mRNA	-	-	COG0167	Dihydroorotate dehydrogenase	K00207	vvi:100249021	dihydropyrimidine dehydrogenase (NADP+) [EC:1.3.1.2]	GO:0055114//oxidation-reduction process;GO:0006212//uracil catabolic process;GO:0006222//UMP biosynthetic process;GO:0006207//'de novo' pyrimidine nucleobase biosynthetic process;GO:0043562//cellular response to nitrogen levels	GO:0004158//dihydroorotate oxidase activity;GO:0017113//dihydropyrimidine dehydrogenase (NADP+) activity	GO:0009570//chloroplast stroma;GO:0005886//plasma membrane
188	CSE_Unigene18869	SW_Unigene12159	-	+	+(Mostly)	696	0.996	3	3	NA	0	NA	gi|225456297|ref|XP_002283689.1|	PREDICTED: uncharacterized protein LOC100247416 [Vitis vinifera] >gi|147823132|emb|CAN75279.1| hypothetical protein VITISV_030868 [Vitis vinifera] >gi|297734405|emb|CBI15652.3| unnamed protein product [Vitis vinifera]	gi|359491071|ref|XM_002283653.2|	PREDICTED: Vitis vinifera uncharacterized LOC100247416 (LOC100247416), mRNA	-	-	COG1872	Uncharacterized conserved protein	K09131	vvi:100247416	hypothetical protein	-	-	GO:0005634//nucleus;GO:0009507//chloroplast
189	CSE_CL6566_Contig1	SW_CL127_Contig1	-	+	+(Mostly)	669	0.988	8	4	4	0.33296	0.115226	gi|225456361|ref|XP_002280221.1|	PREDICTED: thylakoid lumenal 17.9 kDa protein, chloroplastic [Vitis vinifera] >gi|297734440|emb|CBI15687.3| unnamed protein product [Vitis vinifera]	gi|359491098|ref|XM_002280185.2|	PREDICTED: Vitis vinifera thylakoid lumenal 17.9 kDa protein, chloroplastic-like (LOC100262841), mRNA	sp|Q9SW33|TL1Y_ARATH	Thylakoid lumenal 17.9 kDa protein, chloroplastic OS=Arabidopsis thaliana GN=At4g24930 PE=1 SV=1	-	-	-	-	-	GO:0019761//glucosinolate biosynthetic process;GO:0010103//stomatal complex morphogenesis	-	GO:0009543//chloroplast thylakoid lumen
190	CSE_Unigene20911	SW_Unigene11563	-	+	+(Mostly)	1911	0.995	10	4	6	0.581563	0.442746	gi|359492366|ref|XP_002284607.2|	PREDICTED: NAD kinase 2, chloroplastic-like [Vitis vinifera]	gi|359492365|ref|XM_002284571.2|	PREDICTED: Vitis vinifera NAD kinase 2, chloroplastic-like (LOC100266161), mRNA	sp|Q9C5W3|NADK2_ARATH	NAD kinase 2, chloroplastic OS=Arabidopsis thaliana GN=NADK2 PE=1 SV=1	COG0061	Predicted sugar kinase	K00858	cre:CHLREDRAFT_196779	NAD+ kinase [EC:2.7.1.23]	GO:0006741//NADP biosynthetic process;GO:0019674//NAD metabolic process;GO:0016310//phosphorylation	GO:0005516//calmodulin binding;GO:0003951//NAD+ kinase activity;GO:0000166//nucleotide binding	GO:0009507//chloroplast
191	CSE_Unigene1845	SW_Unigene17598	-	+	+(Mostly)	1599	0.994	9	4	5	0.467113	0.209928	gi|359492914|ref|XP_002283933.2|	PREDICTED: uncharacterized protein LOC100267813 [Vitis vinifera]	gi|359492913|ref|XM_002283897.2|	PREDICTED: Vitis vinifera uncharacterized LOC100267813 (LOC100267813), mRNA	sp|Q9LTX3|PPOX1_ARATH	Pyridoxine/pyridoxamine 5'-phosphate oxidase 1, chloroplastic OS=Arabidopsis thaliana GN=PPOX1 PE=1 SV=1	COG0259	Pyridoxamine-phosphate oxidase	-	-	-	GO:0055114//oxidation-reduction process;GO:0042823//pyridoxal phosphate biosynthetic process;GO:0006779//porphyrin-containing compound biosynthetic process;GO:0008615//pyridoxine biosynthetic process;GO:0019761//glucosinolate biosynthetic process;GO:0042817//pyridoxal metabolic process	GO:0004729//oxygen-dependent protoporphyrinogen oxidase activity;GO:0004733//pyridoxamine-phosphate oxidase activity;GO:0010181//FMN binding	GO:0005829//cytosol;GO:0009941//chloroplast envelope;GO:0009534//chloroplast thylakoid;GO:0005576//extracellular region
192	CSE_CL2589_Contig1	SW_Unigene11871	-	+	+(Mostly)	1128	0.996	4	2	2	0.301949	0.229556	gi|225457961|ref|XP_002275256.1|	PREDICTED: BRCA1-A complex subunit BRE [Vitis vinifera] >gi|302142670|emb|CBI19873.3| unnamed protein product [Vitis vinifera]	gi|225457960|ref|XM_002275220.1|	PREDICTED: Vitis vinifera BRCA1-A complex subunit BRE-like (LOC100264259), mRNA	-	-	-	-	K12173	vvi:100264259	BRCA1-A complex subunit BRE	-	-	-
193	CSE_Unigene16849	SW_Unigene13313	-	+	+(Mostly)	678	0.979	14	12	2	0.0613794	4.75738e-07	gi|225459888|ref|XP_002262923.1|	PREDICTED: uncharacterized protein LOC100267182 [Vitis vinifera]	gi|225459887|ref|XM_002262887.1|	PREDICTED: Vitis vinifera uncharacterized LOC100267182 (LOC100267182), mRNA	-	-	-	-	-	-	-	GO:0042538//hyperosmotic salinity response;GO:0009414//response to water deprivation;GO:0048564//photosystem I assembly;GO:0009658//chloroplast organization;GO:0010286//heat acclimation;GO:0080183//response to photooxidative stress	-	GO:0009535//chloroplast thylakoid membrane
194	CSE_Unigene18415	SW_Unigene13312	-	+	+(Mostly)	1986	0.996	8	4	4	0.279446	0.0153491	gi|302143058|emb|CBI20353.3|	unnamed protein product [Vitis vinifera]	gi|359493684|ref|XM_002284607.2|	PREDICTED: Vitis vinifera peptidyl-prolyl cis-trans isomerase CYP37, chloroplastic-like (LOC100258986), mRNA	sp|P82869|CYP37_ARATH	Peptidyl-prolyl cis-trans isomerase CYP37, chloroplastic OS=Arabidopsis thaliana GN=CYP37 PE=1 SV=3	COG0652	Peptidyl-prolyl cis-trans isomerase (rotamase) - cyclophilin family	-	-	-	GO:0016556//mRNA modification;GO:0010103//stomatal complex morphogenesis;GO:0000413//protein peptidyl-prolyl isomerization;GO:0006457//protein folding;GO:0019288//isopentenyl diphosphate biosynthetic process, mevalonate-independent pathway	GO:0003755//peptidyl-prolyl cis-trans isomerase activity	GO:0009535//chloroplast thylakoid membrane;GO:0009543//chloroplast thylakoid lumen
195	CSE_Unigene19700	SW_Unigene16938	-	+	+(Mostly)	1068	0.993	7	3.67379	3.32621	0.347993	0.0993086	gi|225461322|ref|XP_002284546.1|	PREDICTED: cytochrome c-type biogenesis ccda-like chloroplastic protein 2 [Vitis vinifera] >gi|302143076|emb|CBI20371.3| unnamed protein product [Vitis vinifera]	gi|359493893|ref|XM_002284510.2|	PREDICTED: Vitis vinifera cytochrome c-type biogenesis ccda-like chloroplastic protein 2 (LOC100245228), mRNA	sp|Q2QY07|CCDA2_ORYSJ	Cytochrome c-type biogenesis ccda-like chloroplastic protein 2 OS=Oryza sativa subsp. japonica GN=CCDA2 PE=2 SV=1	COG0785	Cytochrome c biogenesis protein	K06196	ppp:PHYPADRAFT_146798	cytochrome c-type biogenesis protein	GO:0010190//cytochrome b6f complex assembly;GO:0045454//cell redox homeostasis;GO:0055114//oxidation-reduction process	-	GO:0055035//plastid thylakoid membrane;GO:0005886//plasma membrane;GO:0009534//chloroplast thylakoid
196	CSE_Unigene17664	SW_Unigene8281	-	+	+(Strictly)	1329	0.992	11	7	4	0.130919	0.00133249	gi|225427364|ref|XP_002282850.1|	PREDICTED: poly(U)-specific endoribonuclease-B [Vitis vinifera] >gi|297742189|emb|CBI33976.3| unnamed protein product [Vitis vinifera]	gi|225427363|ref|XM_002282814.1|	PREDICTED: Vitis vinifera poly(U)-specific endoribonuclease-B-like (LOC100252369), mRNA	-	-	-	-	K14648	vvi:100252369	poly(U)-specific endoribonuclease [EC:3.1.-.-]	-	GO:0016788//hydrolase activity, acting on ester bonds	GO:0005576//extracellular region;GO:0009536//plastid
197	CSE_Unigene18350	SW_Unigene13972	-	+	+(Strictly)	1065	0.983	18	6	12	0.847173	0.794559	gi|225429195|ref|XP_002271890.1|	PREDICTED: uncharacterized protein LOC100241185 [Vitis vinifera] >gi|147804805|emb|CAN73523.1| hypothetical protein VITISV_010704 [Vitis vinifera]	gi|225429194|ref|XM_002271854.1|	PREDICTED: Vitis vinifera uncharacterized LOC100241185 (LOC100241185), mRNA	-	-	COG0750	Predicted membrane-associated Zn-dependent proteases 1	-	-	-	GO:0006457//protein folding;GO:0009644//response to high light intensity;GO:0042542//response to hydrogen peroxide;GO:0006508//proteolysis;GO:0009408//response to heat	GO:0008233//peptidase activity	GO:0016020//membrane;GO:0009536//plastid;GO:0005739//mitochondrion
198	CSE_Unigene11291	SW_Unigene16222	-	+	+(Strictly)	1419	0.994	8	5	3	0.128566	0.0060765	gi|225445744|ref|XP_002272482.1|	PREDICTED: 5&apos;-nucleotidase domain-containing protein DDB_G0275467 [Vitis vinifera] >gi|297743716|emb|CBI36599.3| unnamed protein product [Vitis vinifera]	gi|225445743|ref|XM_002272446.1|	PREDICTED: Vitis vinifera 5'-nucleotidase domain-containing protein DDB_G0275467-like (LOC100255302), mRNA	-	-	-	-	-	-	-	GO:0051604//protein maturation	GO:0046872//metal ion binding;GO:0008253//5'-nucleotidase activity	GO:0005739//mitochondrion;GO:0009507//chloroplast
199	CSE_CL2078_Contig2	SW_Unigene17209	+	+	-	1494	0.991	14	7	7	0.382334	0.0639767	gi|225430539|ref|XP_002285580.1|	PREDICTED: zinc finger CCCH domain-containing protein 18 [Vitis vinifera]	gi|359475900|ref|XM_002285544.2|	PREDICTED: Vitis vinifera zinc finger CCCH domain-containing protein 18-like (LOC100254356), mRNA	sp|Q6K687|C3H18_ORYSJ	Zinc finger CCCH domain-containing protein 18 OS=Oryza sativa subsp. japonica GN=Os02g0793000 PE=2 SV=1	-	-	K13103	cre:CHLREDRAFT_108447	tuftelin-interacting protein 11	-	GO:0003676//nucleic acid binding;GO:0008270//zinc ion binding	GO:0005634//nucleus
200	CSE_Unigene13667	SW_Unigene12483	+	+	-	1770	0.995	9	7	2	0.0796208	0.000562433	gi|225435995|ref|XP_002269919.1|	PREDICTED: F-box/WD-40 repeat-containing protein At5g21040 [Vitis vinifera]	gi|147842283|emb|AM440865.2|	Vitis vinifera contig VV78X217282.6, whole genome shotgun sequence	sp|Q94AD8|FBW3_ARATH	F-box/WD-40 repeat-containing protein At5g21040 OS=Arabidopsis thaliana GN=At5g21040 PE=2 SV=1	COG2319	FOG: WD40 repeat	K14963	pop:POPTR_551164	COMPASS component SWD3	GO:0016036//cellular response to phosphate starvation	-	GO:0005737//cytoplasm;GO:0019005//SCF ubiquitin ligase complex
201	CSE_Unigene14174	SW_Unigene17586	+	+	-	1887	0.996	7	4	3	0.207953	0.0443548	gi|225430918|ref|XP_002270435.1|	PREDICTED: protein KRI1 homolog [Vitis vinifera]	gi|147821483|emb|AM459703.2|	Vitis vinifera contig VV78X126098.4, whole genome shotgun sequence	sp|P13983|EXTN_TOBAC	Extensin OS=Nicotiana tabacum GN=HRGPNT3 PE=2 SV=1	COG5271	AAA ATPase containing von Willebrand factor type A (vWA) domain	K14786	vvi:100240980	protein KRI1	-	-	GO:0005829//cytosol
202	CSE_Unigene14294	SW_Unigene15792	+	+	-	333	0.994	2	1	1	0.340321	0.380995	gi|225450223|ref|XP_002265835.1|	PREDICTED: thioredoxin-like protein Clot [Vitis vinifera] >gi|297736204|emb|CBI24842.3| unnamed protein product [Vitis vinifera]	gi|225450222|ref|XM_002265799.1|	PREDICTED: Vitis vinifera thioredoxin-like protein Clot (LOC100247612), mRNA	sp|Q9FMN4|TCLOT_ARATH	Thioredoxin-like protein Clot OS=Arabidopsis thaliana GN=At5g42850 PE=2 SV=1	-	-	-	-	-	GO:0045454//cell redox homeostasis	-	GO:0005737//cytoplasm
203	CSE_Unigene14689	SW_Unigene22644	+	+	-	936	0.535	21	7	14	0.618388	0.302347	gi|359482520|ref|XP_002280228.2|	PREDICTED: beta-galactosidase 17-like [Vitis vinifera] >gi|297743091|emb|CBI35958.3| unnamed protein product [Vitis vinifera]	gi|359482519|ref|XM_002280192.2|	PREDICTED: Vitis vinifera beta-galactosidase 17-like (LOC100251499), mRNA	sp|Q93Z24|BGA17_ARATH	Beta-galactosidase 17 OS=Arabidopsis thaliana GN=BGAL17 PE=2 SV=1	COG1874	Beta-galactosidase	K12309	vvi:100251499	beta-galactosidase [EC:3.2.1.23]	GO:0010413//glucuronoxylan metabolic process;GO:0016926//protein desumoylation;GO:0010228//vegetative to reproductive phase transition of meristem;GO:0045492//xylan biosynthetic process;GO:0050665//hydrogen peroxide biosynthetic process	GO:0004565//beta-galactosidase activity	GO:0005576//extracellular region
204	CSE_Unigene15113	SW_Unigene4550	+	+	-	960	0.99	10	6	4	0.209487	0.0163058	gi|359492751|ref|XP_002284446.2|	PREDICTED: prolyl-tRNA synthetase associated domain-containing protein 1-like [Vitis vinifera] >gi|302141840|emb|CBI19043.3| unnamed protein product [Vitis vinifera]	gi|359492750|ref|XM_002284410.2|	PREDICTED: Vitis vinifera prolyl-tRNA synthetase associated domain-containing protein 1-like (LOC100252259), mRNA	-	-	COG3760	Uncharacterized conserved protein	K10706	smo:SELMODRAFT_444379	senataxin [EC:3.6.4.-]	GO:0006450//regulation of translational fidelity	GO:0002161//aminoacyl-tRNA editing activity	GO:0005829//cytosol
205	CSE_Unigene15158	SW_Unigene22261	+	+	-	1155	0.994	7	4	3	0.293754	0.103751	gi|147782976|emb|CAN72958.1|	hypothetical protein VITISV_010788 [Vitis vinifera]	gi|349731375|emb|FQ394497.1|	Vitis vinifera clone SS0AFA20YG15	-	-	COG4243	Predicted membrane protein	-	-	-	GO:0006098//pentose-phosphate shunt;GO:0019288//isopentenyl diphosphate biosynthetic process, mevalonate-independent pathway;GO:0000023//maltose metabolic process;GO:0019252//starch biosynthetic process;GO:0010207//photosystem II assembly;GO:0019761//glucosinolate biosynthetic process	GO:0003955//NAD(P)H dehydrogenase (quinone) activity	GO:0009507//chloroplast;GO:0016020//membrane
206	CSE_Unigene15497	SW_Unigene17560	+	+	-	480	0.992	4	3	1	0.108829	0.0459745	gi|225445450|ref|XP_002285089.1|	PREDICTED: uncharacterized protein LOC100266409 [Vitis vinifera] >gi|147821405|emb|CAN63500.1| hypothetical protein VITISV_011675 [Vitis vinifera] >gi|297738929|emb|CBI28174.3| unnamed protein product [Vitis vinifera]	gi|225445449|ref|XM_002285053.1|	PREDICTED: Vitis vinifera uncharacterized LOC100266409 (LOC100266409), mRNA	sp|F4K460|MED17_ARATH	Mediator of RNA polymerase II transcription subunit 17 OS=Arabidopsis thaliana GN=MED17 PE=1 SV=1	-	-	K15133	vvi:100266409	mediator of RNA polymerase II transcription subunit 17	GO:0006357//regulation of transcription from RNA polymerase II promoter	GO:0001104//RNA polymerase II transcription cofactor activity	GO:0016592//mediator complex
207	CSE_Unigene15915	SW_Unigene17626	+	+	-	714	0.96	17	5	12	0.895824	0.783702	gi|147818338|emb|CAN75840.1|	hypothetical protein VITISV_031633 [Vitis vinifera]	gi|349719639|emb|FQ381457.1|	Vitis vinifera clone SS0ABP1YJ08	sp|P51204|YCF54_PORPU	Uncharacterized protein ycf54 OS=Porphyra purpurea GN=ycf54 PE=3 SV=1	-	-	-	-	-	-	-	GO:0009579//thylakoid;GO:0009507//chloroplast
208	CSE_Unigene16245	SW_Unigene21918	+	+	-	1404	0.997	4	2	2	0.290273	0.218366	gi|225440882|ref|XP_002276711.1|	PREDICTED: uncharacterized protein At5g03900, chloroplastic-like [Vitis vinifera]	gi|359482005|ref|XM_002276675.2|	PREDICTED: Vitis vinifera uncharacterized LOC100240863 (LOC100240863), mRNA	sp|Q8GW20|Y5390_ARATH	Uncharacterized protein At5g03900, chloroplastic OS=Arabidopsis thaliana GN=At5g03900 PE=1 SV=2	-	-	-	-	-	-	-	GO:0009941//chloroplast envelope
209	CSE_Unigene17393	SW_Unigene11202	+	+	-	2049	0.996	9	5	4	0.203665	0.0210424	gi|225455880|ref|XP_002275327.1|	PREDICTED: protein CASP [Vitis vinifera]	gi|359490941|ref|XM_002275291.2|	PREDICTED: Vitis vinifera protein CASP-like (LOC100259260), mRNA	sp|Q9LS42|CASP_ARATH	Protein CASP OS=Arabidopsis thaliana GN=CASP PE=1 SV=2	COG0419	ATPase involved in DNA repair	K09313	vvi:100259260	homeobox protein cut-like	GO:0006891//intra-Golgi vesicle-mediated transport;GO:0030244//cellulose biosynthetic process	-	GO:0005768//endosome;GO:0030173//integral to Golgi membrane;GO:0005802//trans-Golgi network
210	CSE_Unigene17851	SW_Unigene15727	+	+	-	1110	0.993	8	2	6	1.08151	0.915366	gi|225426146|ref|XP_002278325.1|	PREDICTED: uncharacterized protein LOC100246733 isoform 1 [Vitis vinifera] >gi|297742242|emb|CBI34391.3| unnamed protein product [Vitis vinifera]	gi|225426145|ref|XM_002278289.1|	PREDICTED: Vitis vinifera uncharacterized LOC100246733, transcript variant 1 (LOC100246733), mRNA	-	-	-	-	K11135	vvi:100246733	Pin2-interacting protein X1	-	GO:0003676//nucleic acid binding	GO:0005622//intracellular
211	CSE_Unigene18128	SW_CL8715_Contig1	+	+	-	399	0.949	12	5	7	0.514973	0.30082	gi|225427143|ref|XP_002277265.1|	PREDICTED: uncharacterized protein LOC100266016 [Vitis vinifera] >gi|297742063|emb|CBI33850.3| unnamed protein product [Vitis vinifera]	gi|225427142|ref|XM_002277229.1|	PREDICTED: Vitis vinifera uncharacterized LOC100266016 (LOC100266016), mRNA	sp|O82290|SKL2_ARATH	Probable inactive shikimate kinase like 2, chloroplastic OS=Arabidopsis thaliana GN=SKL2 PE=2 SV=2	-	-	-	-	-	GO:0016310//phosphorylation	GO:0004765//shikimate kinase activity;GO:0005524//ATP binding	GO:0009536//plastid
212	CSE_Unigene1891	SW_Unigene1599	+	+	-	993	0.992	8	6	2	0.0984551	0.00261116	gi|225453040|ref|XP_002265238.1|	PREDICTED: tyrosyl-tRNA synthetase-like [Vitis vinifera]	gi|359488088|ref|XM_002265202.2|	PREDICTED: Vitis vinifera tyrosyl-tRNA synthetase-like (LOC100246653), mRNA	-	-	COG0162	Tyrosyl-tRNA synthetase	K01866	vvi:100246653	tyrosyl-tRNA synthetase [EC:6.1.1.1]	GO:0006655//phosphatidylglycerol biosynthetic process;GO:0009793//embryo development ending in seed dormancy;GO:0006437//tyrosyl-tRNA aminoacylation;GO:0016226//iron-sulfur cluster assembly;GO:0010228//vegetative to reproductive phase transition of meristem;GO:0009658//chloroplast organization;GO:0048481//ovule development;GO:0010027//thylakoid membrane organization	GO:0003723//RNA binding;GO:0004831//tyrosine-tRNA ligase activity;GO:0005524//ATP binding	GO:0009570//chloroplast stroma;GO:0005739//mitochondrion
213	CSE_Unigene19359	SW_Unigene17157	+	+	-	1740	0.994	11	8	3	0.11544	0.000788343	gi|359495248|ref|XP_002271456.2|	PREDICTED: histidyl-tRNA synthetase-like [Vitis vinifera]	gi|359495247|ref|XM_002271420.2|	PREDICTED: Vitis vinifera histidyl-tRNA synthetase-like (LOC100241489), mRNA	sp|P93422|SYH_ORYSJ	Histidine-tRNA ligase OS=Oryza sativa subsp. japonica GN=Os05g0150900 PE=2 SV=2	COG0124	Histidyl-tRNA synthetase	K01892	vvi:100241489	histidyl-tRNA synthetase [EC:6.1.1.21]	GO:0006427//histidyl-tRNA aminoacylation;GO:0048481//ovule development	GO:0005524//ATP binding;GO:0004821//histidine-tRNA ligase activity	GO:0005829//cytosol;GO:0009536//plastid
214	CSE_Unigene20770	SW_Unigene12940	+	+	-	3120	0.994	19	6	13	0.63461	0.400049	gi|225443088|ref|XP_002271967.1|	PREDICTED: nuclear pore complex protein Nup98-Nup96 [Vitis vinifera]	gi|225443087|ref|XM_002271931.1|	PREDICTED: Vitis vinifera nuclear pore complex protein Nup98-Nup96-like (LOC100257675), mRNA	-	-	-	-	K14297	ppp:PHYPADRAFT_144605	nuclear pore complex protein Nup98-Nup96	GO:0000394//RNA splicing, via endonucleolytic cleavage and ligation;GO:0006406//mRNA export from nucleus;GO:0009910//negative regulation of flower development;GO:0009086//methionine biosynthetic process;GO:0009870//defense response signaling pathway, resistance gene-dependent;GO:0010074//maintenance of meristem identity;GO:0006606//protein import into nucleus;GO:0009733//response to auxin stimulus	GO:0005515//protein binding;GO:0015288//porin activity	GO:0031965//nuclear membrane;GO:0005643//nuclear pore
215	CSE_Unigene294	SW_CL3141_Contig1	+	+	-	1692	0.989	15	8	7	0.277768	0.0142306	gi|225455690|ref|XP_002265587.1|	PREDICTED: mitochondrial intermediate peptidase [Vitis vinifera]	gi|225455689|ref|XM_002265551.1|	PREDICTED: Vitis vinifera mitochondrial intermediate peptidase-like (LOC100262804), mRNA	-	-	COG0339	Zn-dependent oligopeptidases	K01410	vvi:100262804	mitochondrial intermediate peptidase [EC:3.4.24.59]	GO:0019243//methylglyoxal catabolic process to D-lactate;GO:0006508//proteolysis	GO:0046872//metal ion binding;GO:0004222//metalloendopeptidase activity	GO:0009535//chloroplast thylakoid membrane;GO:0005739//mitochondrion
216	CSE_Unigene574	SW_Unigene22759	+	+	-	1017	0.987	7	6	1	0.061937	0.00209887	gi|225464619|ref|XP_002275817.1|	PREDICTED: uncharacterized protein P11E10.01 [Vitis vinifera]	gi|359490462|ref|XM_002275781.2|	PREDICTED: Vitis vinifera uncharacterized LOC100259461 (LOC100259461), mRNA	sp|Q9LVN1|FH13_ARATH	Formin-like protein 13 OS=Arabidopsis thaliana GN=FH13 PE=2 SV=3	COG2423	Predicted ornithine cyclodeaminase, mu-crystallin homolog	K01051	gmx:100776781	pectinesterase [EC:3.1.1.11]	GO:0009627//systemic acquired resistance;GO:0034976//response to endoplasmic reticulum stress	GO:0008473//ornithine cyclodeaminase activity;GO:0005212//structural constituent of eye lens;GO:0000166//nucleotide binding	GO:0009507//chloroplast
217	CSE_Unigene6332	SW_Unigene8954	+	+	-	633	0.987	8	3	5	0.563003	0.329558	gi|225424940|ref|XP_002263763.1|	PREDICTED: uncharacterized protein MJ0044 [Vitis vinifera] >gi|296088284|emb|CBI36510.3| unnamed protein product [Vitis vinifera]	gi|359494689|ref|XM_002263727.2|	PREDICTED: Vitis vinifera uncharacterized LOC100247979 (LOC100247979), mRNA	-	-	COG1608	Predicted archaeal kinase	K12657	mtr:MTR_4g020450	delta-1-pyrroline-5-carboxylate synthetase [EC:2.7.2.11 1.2.1.41]	GO:0008652//cellular amino acid biosynthetic process;GO:0016310//phosphorylation	GO:0016301//kinase activity	GO:0005737//cytoplasm
218	CSE_Unigene789	SW_Unigene12044	+	+	-	1569	0.994	9	3	6	0.470679	0.238008	gi|359494703|ref|XP_002269379.2|	PREDICTED: ubiquinone biosynthesis monooxygenase COQ6-like [Vitis vinifera]	gi|359494702|ref|XM_002269343.2|	PREDICTED: Vitis vinifera ubiquinone biosynthesis monooxygenase COQ6-like (LOC100248856), mRNA	sp|Q8RWY3|ISW2_ARATH	Putative chromatin-remodeling complex ATPase chain OS=Arabidopsis thaliana GN=At3g06400 PE=2 SV=3	COG0654	2-polyprenyl-6-methoxyphenol hydroxylase and related FAD-dependent oxidoreductases	K06126	vvi:100248856	ubiquinone biosynthesis monooxygenase Coq6 [EC:1.14.13.-]	GO:0019243//methylglyoxal catabolic process to D-lactate;GO:0006744//ubiquinone biosynthetic process;GO:0055114//oxidation-reduction process	GO:0050660//flavin adenine dinucleotide binding;GO:0016709//oxidoreductase activity, acting on paired donors, with incorporation or reduction of molecular oxygen, NAD(P)H as one donor, and incorporation of one atom of oxygen	GO:0005739//mitochondrion
219	CSE_Unigene14164	SW_Unigene13879	-	-	+(Mostly)	474	0.987	6	4	2	0.168343	0.0397151	gi|225448279|ref|XP_002274773.1|	PREDICTED: nudC domain-containing protein 2 [Vitis vinifera] >gi|296086806|emb|CBI32955.3| unnamed protein product [Vitis vinifera]	gi|225448278|ref|XM_002274737.1|	PREDICTED: Vitis vinifera nudC domain-containing-like (LOC100247442), mRNA	sp|Q9STN7|BOB2_ARATH	Protein BOBBER 2 OS=Arabidopsis thaliana GN=BOB2 PE=2 SV=1	-	-	-	-	-	-	-	GO:0005737//cytoplasm
220	CSE_Unigene10796	SW_Unigene7053	-	-	+(Mostly)	981	0.999	1	1	NA	0	NA	gi|359497083|ref|XP_003635420.1|	PREDICTED: sphingolipid delta(4)-desaturase DES1-like [Vitis vinifera]	gi|349710511|emb|FQ396174.1|	Vitis vinifera clone SS0AFA11YI03	-	-	COG3239	Fatty acid desaturase	K04712	vvi:100854247	sphingolipid delta-4 desaturase [EC:1.14.-.-]	GO:0006633//fatty acid biosynthetic process;GO:0055114//oxidation-reduction process;GO:0030148//sphingolipid biosynthetic process;GO:0009860//pollen tube growth;GO:0009827//plant-type cell wall modification	GO:0042284//sphingolipid delta-4 desaturase activity	GO:0016021//integral to membrane
221	CSE_Unigene13835	SW_Unigene21917	-	-	+(Mostly)	693	0.994	4	2	2	0.329207	0.255403	gi|359497145|ref|XP_002264869.2|	PREDICTED: 50S ribosomal protein L19, chloroplastic [Vitis vinifera] >gi|296088907|emb|CBI38456.3| unnamed protein product [Vitis vinifera]	gi|349709385|emb|FQ385555.1|	Vitis vinifera clone SS0AEB31YN16	sp|Q8RXX5|RK192_ARATH	50S ribosomal protein L19-2, chloroplastic OS=Arabidopsis thaliana GN=At5g47190 PE=2 SV=1	COG0335	Ribosomal protein L19	-	-	-	GO:0010103//stomatal complex morphogenesis;GO:0009793//embryo development ending in seed dormancy;GO:0006412//translation;GO:0019288//isopentenyl diphosphate biosynthetic process, mevalonate-independent pathway;GO:0051607//defense response to virus;GO:0016226//iron-sulfur cluster assembly;GO:0010228//vegetative to reproductive phase transition of meristem;GO:0035196//production of miRNAs involved…	GO:0003735//structural constituent of ribosome;GO:0003723//RNA binding	GO:0009941//chloroplast envelope;GO:0016020//membrane;GO:0005840//ribosome;GO:0009570//chloroplast stroma
222	CSE_Unigene5267	SW_Unigene23335	-	-	+(Mostly)	1227	0.992	10	6	4	0.17993	0.00907752	gi|359495466|ref|XP_002277046.2|	PREDICTED: telomerase Cajal body protein 1-like [Vitis vinifera] >gi|302144185|emb|CBI23312.3| unnamed protein product [Vitis vinifera]	gi|359495465|ref|XM_002277010.2|	PREDICTED: Vitis vinifera telomerase Cajal body protein 1-like (LOC100267300), mRNA	sp|Q8H0T9|KTNB1_ARATH	Katanin p80 WD40 repeat-containing subunit B1 homolog OS=Arabidopsis thaliana GN=At5g23430 PE=2 SV=3	COG2319	FOG: WD40 repeat	K14963	gmx:100794027	COMPASS component SWD3	-	GO:0000166//nucleotide binding	GO:0080008//Cul4-RING ubiquitin ligase complex;GO:0005737//cytoplasm
223	CSE_CL5376_Contig1	SW_Unigene943	-	-	+(Mostly)	2097	0.99	20	8	12	0.457163	0.10273	gi|359495626|ref|XP_002269600.2|	PREDICTED: pentatricopeptide repeat-containing protein At4g16390, chloroplastic [Vitis vinifera]	gi|359495625|ref|XM_002269564.2|	PREDICTED: Vitis vinifera pentatricopeptide repeat-containing protein At4g16390, chloroplastic-like (LOC100259703), mRNA	sp|Q8GWE0|PP314_ARATH	Pentatricopeptide repeat-containing protein At4g16390, chloroplastic OS=Arabidopsis thaliana GN=P67 PE=1 SV=3	-	-	K15336	vvi:100259391	tRNA (cytosine38-C5)-methyltransferase [EC:2.1.1.204]	GO:0031425//chloroplast RNA processing;GO:0009658//chloroplast organization;GO:0045727//positive regulation of translation;GO:0045036//protein targeting to chloroplast	-	GO:0009570//chloroplast stroma
224	CSE_Unigene17637	SW_Unigene5314	-	-	+(Mostly)	1728	0.987	20	6.60581	13.3942	0.550402	0.159241	gi|359495826|ref|XP_002265825.2|	PREDICTED: protease Do-like 10, mitochondrial-like [Vitis vinifera] >gi|296086873|emb|CBI33040.3| unnamed protein product [Vitis vinifera]	gi|359495825|ref|XM_002265789.2|	PREDICTED: Vitis vinifera protease Do-like 10, mitochondrial-like (LOC100250366), mRNA	sp|Q9FIV6|DGP10_ARATH	Protease Do-like 10, mitochondrial OS=Arabidopsis thaliana GN=DEGP10 PE=2 SV=1	COG0265	Trypsin-like serine proteases, typically periplasmic, contain C-terminal PDZ domain	K01362	cme:CMD006C	[EC:3.4.21.-]	GO:0006508//proteolysis	GO:0004252//serine-type endopeptidase activity	GO:0009535//chloroplast thylakoid membrane;GO:0005739//mitochondrion
225	CSE_Unigene15335	SW_Unigene13698	-	-	+(Mostly)	876	0.995	4	3	1	0.104737	0.0421465	gi|225468850|ref|XP_002266252.1|	PREDICTED: putative oxidoreductase GLYR1 isoform 1 [Vitis vinifera] >gi|147861759|emb|CAN78910.1| hypothetical protein VITISV_032948 [Vitis vinifera] >gi|297736660|emb|CBI25677.3| unnamed protein product [Vitis vinifera]	gi|470116328|ref|XM_004294287.1|	PREDICTED: Fragaria vesca subsp. vesca glyoxylate/succinic semialdehyde reductase 1-like (LOC101294441), mRNA	sp|Q9LSV0|GLYR1_ARATH	Glyoxylate/succinic semialdehyde reductase 1 OS=Arabidopsis thaliana GN=GLYR1 PE=1 SV=1	COG2084	3-hydroxyisobutyrate dehydrogenase and related beta-hydroxyacid dehydrogenases	K00020	olu:OSTLU_45774	3-hydroxyisobutyrate dehydrogenase [EC:1.1.1.31]	GO:0006979//response to oxidative stress;GO:0006098//pentose-phosphate shunt;GO:0019288//isopentenyl diphosphate biosynthetic process, mevalonate-independent pathway;GO:0006573//valine metabolic process;GO:0009448//gamma-aminobutyric acid metabolic process;GO:0007020//microtubule nucleation;GO:0019344//cysteine biosynthetic process	GO:0008442//3-hydroxyisobutyrate dehydrogenase activity;GO:0008679//2-hydroxy-3-oxopropionate reductase activity;GO:0000166//nucleotide binding;GO:0004616//phosphogluconate dehydrogenase (decarboxylating) activity;GO:0050662//coenzyme binding;GO:0003858//3-hydroxybutyrate dehydrogenase activity	GO:0005829//cytosol;GO:0005739//mitochondrion
226	CSE_Unigene17424	SW_CL5742_Contig1	-	-	+(Mostly)	651	0.997	2	1	1	0.315066	0.365482	gi|359496063|ref|XP_002270399.2|	PREDICTED: autophagy-related protein 101 [Vitis vinifera] >gi|297735844|emb|CBI18564.3| unnamed protein product [Vitis vinifera]	gi|359496062|ref|XM_002270363.2|	PREDICTED: Vitis vinifera autophagy-related protein 101-like (LOC100265795), mRNA	-	-	-	-	-	-	-	-	GO:0016772//transferase activity, transferring phosphorus-containing groups;GO:0000166//nucleotide binding	GO:0005737//cytoplasm;GO:0005634//nucleus
227	CSE_Unigene18166	SW_Unigene22037	-	-	+(Mostly)	975	0.996	4	2	2	0.307904	0.235323	gi|225469300|ref|XP_002269258.1|	PREDICTED: nuclease S1 [Vitis vinifera]	gi|359496320|ref|XM_002269222.2|	PREDICTED: Vitis vinifera nuclease S1-like (LOC100265776), mRNA	sp|F4JJL0|ENDO4_ARATH	Endonuclease 4 OS=Arabidopsis thaliana GN=ENDO4 PE=3 SV=1	-	-	-	-	-	GO:0006308//DNA catabolic process;GO:0009827//plant-type cell wall modification;GO:0010106//cellular response to iron ion starvation;GO:0015706//nitrate transport;GO:0006826//iron ion transport;GO:0010167//response to nitrate;GO:0048481//ovule development;GO:0009860//pollen tube growth;GO:0048441//petal development;GO:0016132//brassinosteroid biosynthetic process;GO:0048443//stamen development	GO:0003676//nucleic acid binding;GO:0000014//single-stranded DNA specific endodeoxyribonuclease activity;GO:0043765//T/G mismatch-specific endonuclease activity	GO:0005576//extracellular region
228	CSE_Unigene981	SW_CL3988_Contig3	-	-	+(Mostly)	945	0.996	4	3	1	0.118714	0.0539566	gi|359496682|ref|XP_003635299.1|	PREDICTED: protein CbbY-like [Vitis vinifera]	gi|359496681|ref|XM_003635251.1|	PREDICTED: Vitis vinifera protein CbbY-like (LOC100853189), mRNA	-	-	COG0637	Predicted phosphatase/phosphohexomutase	K00861	bdi:100832727	riboflavin kinase [EC:2.7.1.26]	GO:0019761//glucosinolate biosynthetic process	GO:0016787//hydrolase activity	GO:0009941//chloroplast envelope;GO:0009570//chloroplast stroma
229	CSE_Unigene18978	SW_Unigene15191	-	-	+(Mostly)	3399	0.994	19	9	10	0.304007	0.010927	gi|225465133|ref|XP_002273767.1|	PREDICTED: peroxisome biogenesis protein 1-like [Vitis vinifera]	gi|225465132|ref|XM_002273731.1|	PREDICTED: Vitis vinifera peroxisome biogenesis protein 1-like (LOC100259773), mRNA	sp|Q9FNP1|PEX1_ARATH	Peroxisome biogenesis protein 1 OS=Arabidopsis thaliana GN=PEX1 PE=2 SV=2	COG0464	ATPases of the AAA+ class	K13338	vvi:100259773	peroxin-1	GO:0016558//protein import into peroxisome matrix;GO:0006635//fatty acid beta-oxidation	GO:0005524//ATP binding;GO:0008568//microtubule-severing ATPase activity;GO:0005515//protein binding	GO:0005778//peroxisomal membrane;GO:0005886//plasma membrane
230	CSE_CL5463_Contig1	SW_CL5669_Contig1	-	-	+(Mostly)	1347	0.99	14	8	6	0.213007	0.00490013	gi|302143251|emb|CBI20546.3|	unnamed protein product [Vitis vinifera]	gi|225465122|ref|XM_002273003.1|	PREDICTED: Vitis vinifera BRCA1-associated protein-like (LOC100242688), mRNA	sp|Q8LFY8|ATL54_ARATH	RING-H2 finger protein ATL54 OS=Arabidopsis thaliana GN=ATL54 PE=2 SV=2	COG1318	Predicted transcriptional regulators	K10632	vvi:100242688	BRCA1-associated protein [EC:6.3.2.19]	GO:0010029//regulation of seed germination;GO:0016567//protein ubiquitination;GO:0009688//abscisic acid biosynthetic process	GO:0008270//zinc ion binding;GO:0043130//ubiquitin binding;GO:0004842//ubiquitin-protein ligase activity;GO:0046982//protein heterodimerization activity;GO:0016787//hydrolase activity	GO:0000151//ubiquitin ligase complex
231	CSE_Unigene850	SW_Unigene15032	-	-	+(Mostly)	600	0.988	7	3	4	0.332429	0.149289	gi|225463085|ref|XP_002263568.1|	PREDICTED: hypoxanthine-guanine phosphoribosyltransferase [Vitis vinifera] >gi|147785106|emb|CAN75448.1| hypothetical protein VITISV_030928 [Vitis vinifera] >gi|297739372|emb|CBI29362.3| unnamed protein product [Vitis vinifera]	gi|359495184|ref|XM_002263532.2|	PREDICTED: Vitis vinifera hypoxanthine-guanine phosphoribosyltransferase-like (LOC100242653), mRNA	-	-	COG0634	Hypoxanthine-guanine phosphoribosyltransferase	K00760	vvi:100242653	hypoxanthine phosphoribosyltransferase [EC:2.4.2.8]	GO:0032264//IMP salvage;GO:0006166//purine ribonucleoside salvage;GO:0032263//GMP salvage;GO:0009845//seed germination;GO:0006178//guanine salvage;GO:0006168//adenine salvage;GO:0046100//hypoxanthine metabolic process	GO:0052657//guanine phosphoribosyltransferase activity;GO:0004422//hypoxanthine phosphoribosyltransferase activity;GO:0000287//magnesium ion binding	GO:0005829//cytosol
232	CSE_Unigene16616	SW_Unigene15779	-	-	+(Mostly)	999	0.989	8	5	3	0.225493	0.0400164	gi|297740945|emb|CBI31257.3|	unnamed protein product [Vitis vinifera]	gi|225460076|ref|XR_077746.1|	PREDICTED: Vitis vinifera TVP38/TMEM64 family membrane protein slr0305-like (LOC100246522), miscRNA	-	-	COG0398	Uncharacterized conserved protein	-	-	-	GO:0010264//myo-inositol hexakisphosphate biosynthetic process	-	GO:0009507//chloroplast
233	CSE_Unigene11519	SW_CL7972_Contig1	-	-	+(Mostly)	750	0.974	8	5	3	0.196021	0.0262123	gi|225467979|ref|XP_002269050.1|	PREDICTED: U-box domain-containing protein 33 [Vitis vinifera]	gi|225467978|ref|XM_002269014.1|	PREDICTED: Vitis vinifera U-box domain-containing protein 33-like (LOC100244702), mRNA	sp|Q8GUH1|PUB33_ARATH	U-box domain-containing protein 33 OS=Arabidopsis thaliana GN=PUB33 PE=2 SV=2	-	-	-	-	-	GO:0006950//response to stress	-	-
234	CSE_Unigene18169	SW_Unigene22258	-	-	+(Mostly)	867	0.994	5	4	1	0.093991	0.0206508	gi|225444450|ref|XP_002271487.1|	PREDICTED: uncharacterized protein LOC100250291 [Vitis vinifera]	gi|359494824|ref|XM_002271451.2|	PREDICTED: Vitis vinifera uncharacterized LOC100250291 (LOC100250291), mRNA	-	-	-	-	-	-	-	GO:0046786//viral replication complex formation and maintenance;GO:0006914//autophagy	-	GO:0005886//plasma membrane;GO:0005774//vacuolar membrane
235	CSE_Unigene17636	SW_Unigene8787	-	-	+(Mostly)	1191	0.994	7	4	3	0.18593	0.0329687	gi|359494840|ref|XP_003634851.1|	PREDICTED: pentatricopeptide repeat-containing protein At1g61870, mitochondrial-like [Vitis vinifera]	gi|123671853|emb|AM426541.1|	Vitis vinifera contig VV78X275378.15, whole genome shotgun sequence	sp|Q8LE47|PPR87_ARATH	Pentatricopeptide repeat-containing protein At1g61870, mitochondrial OS=Arabidopsis thaliana GN=PPR336 PE=2 SV=2	-	-	K15336	vvi:100259391	tRNA (cytosine38-C5)-methyltransferase [EC:2.1.1.204]	GO:0006333//chromatin assembly or disassembly;GO:0006355//regulation of transcription, DNA-dependent	GO:0003700//sequence-specific DNA binding transcription factor activity	GO:0016020//membrane;GO:0005739//mitochondrion
236	CSE_Unigene21345	SW_Unigene23151	-	-	+(Mostly)	942	0.996	4	2	2	0.342932	0.267471	gi|359494866|ref|XP_003634858.1|	PREDICTED: monoglyceride lipase-like [Vitis vinifera] >gi|147852280|emb|CAN82216.1| hypothetical protein VITISV_020423 [Vitis vinifera]	gi|147852278|emb|AM427761.2|	Vitis vinifera contig VV78X163834.9, whole genome shotgun sequence	-	-	COG2267	Lysophospholipase	-	-	-	-	GO:0047372//acylglycerol lipase activity	GO:0005794//Golgi apparatus;GO:0005634//nucleus
237	CSE_Unigene17942	SW_Unigene1867	-	-	+(Mostly)	1224	0.996	5	2	3	0.672201	0.489053	gi|359494758|ref|XP_002263684.2|	PREDICTED: uncharacterized sodium-dependent transporter yocS-like [Vitis vinifera] >gi|297742832|emb|CBI35586.3| unnamed protein product [Vitis vinifera]	gi|359494757|ref|XM_002263648.2|	PREDICTED: Vitis vinifera uncharacterized LOC100256899 (LOC100256899), mRNA	sp|Q8RXE8|BASS3_ARATH	Probable sodium/metabolite cotransporter BASS3, chloroplastic OS=Arabidopsis thaliana GN=BASS3 PE=2 SV=1	COG0385	Predicted Na+-dependent transporter	K03453	osa:4329356	bile acid:Na+ symporter, BASS family	GO:0006814//sodium ion transport	GO:0008508//bile acid:sodium symporter activity	GO:0009507//chloroplast;GO:0016020//membrane
238	CSE_Unigene12856	SW_Unigene11074	-	-	+(Mostly)	1149	0.991	10	3	7	1.02473	0.974127	gi|225467372|ref|XP_002267529.1|	PREDICTED: protein SENSITIVE TO PROTON RHIZOTOXICITY 1-like [Vitis vinifera]	gi|225467371|ref|XM_002267493.1|	PREDICTED: Vitis vinifera protein SENSITIVE TO PROTON RHIZOTOXICITY 1-like (LOC100243798), mRNA	sp|Q943I6|STOP1_ORYSJ	Zinc finger protein STOP1 homolog OS=Oryza sativa subsp. japonica GN=Os01g0871200 PE=2 SV=1	-	-	-	-	-	-	-	-
239	CSE_Unigene8417	SW_Unigene11853	-	-	+(Mostly)	759	0.995	4	3	1	0.120274	0.0554921	gi|225449889|ref|XP_002266769.1|	PREDICTED: UPF0551 protein C8orf38 homolog, mitochondrial-like [Vitis vinifera]	gi|225449888|ref|XM_002266733.1|	PREDICTED: Vitis vinifera UPF0551 protein C8orf38 homolog, mitochondrial-like (LOC100255053), mRNA	-	-	COG1562	Phytoene/squalene synthetase	-	-	-	GO:0006457//protein folding;GO:0009058//biosynthetic process;GO:0006626//protein targeting to mitochondrion;GO:0009408//response to heat;GO:0009644//response to high light intensity;GO:0042542//response to hydrogen peroxide	GO:0016740//transferase activity	GO:0005739//mitochondrion;GO:0009507//chloroplast
240	CSE_Unigene19262	SW_Unigene3979	-	-	+(Mostly)	1617	0.995	8	3	5	0.556372	0.323191	gi|225433320|ref|XP_002285561.1|	PREDICTED: carboxyl-terminal-processing protease [Vitis vinifera] >gi|296088261|emb|CBI35769.3| unnamed protein product [Vitis vinifera]	gi|359494724|ref|XM_002285525.2|	PREDICTED: Vitis vinifera carboxyl-terminal-processing protease-like (LOC100252881), mRNA	sp|O04073|CTPA_SCEOB	C-terminal processing peptidase, chloroplastic OS=Scenedesmus obliquus GN=ctpA PE=1 SV=1	COG0793	Periplasmic protease	-	-	-	GO:0035556//intracellular signal transduction;GO:0006655//phosphatidylglycerol biosynthetic process;GO:0006508//proteolysis	GO:0008236//serine-type peptidase activity	GO:0005739//mitochondrion;GO:0005576//extracellular region;GO:0009543//chloroplast thylakoid lumen
241	CSE_Unigene298	SW_Unigene16801	-	-	+(Mostly)	1557	0.996	7	3	4	0.307705	0.0267282	gi|225424625|ref|XP_002282301.1|	PREDICTED: pentatricopeptide repeat-containing protein At1g13040, mitochondrial [Vitis vinifera] >gi|296081374|emb|CBI16807.3| unnamed protein product [Vitis vinifera]	gi|123681713|emb|AM467925.1|	Vitis vinifera, whole genome shotgun sequence, contig VV78X050705.8, clone ENTAV 115	sp|Q9SAD9|PPR40_ARATH	Pentatricopeptide repeat-containing protein At1g13040, mitochondrial OS=Arabidopsis thaliana GN=At1g13040 PE=2 SV=1	-	-	K15336	vvi:100259391	tRNA (cytosine38-C5)-methyltransferase [EC:2.1.1.204]	GO:0009688//abscisic acid biosynthetic process	-	GO:0005886//plasma membrane;GO:0005774//vacuolar membrane;GO:0005739//mitochondrion
242	CSE_Unigene14953	SW_CL203_Contig5	-	-	+(Mostly)	825	0.996	3	2	1	0.184401	0.159873	gi|225425178|ref|XP_002265340.1|	PREDICTED: delta(3,5)-Delta(2,4)-dienoyl-CoA isomerase, mitochondrial [Vitis vinifera] >gi|296088718|emb|CBI38168.3| unnamed protein product [Vitis vinifera]	gi|359473795|ref|XM_002265304.2|	PREDICTED: Vitis vinifera delta(3,5)-Delta(2,4)-dienoyl-CoA isomerase, mitochondrial-like (LOC100249010), mRNA	sp|Q39659|MFPA_CUCSA	Glyoxysomal fatty acid beta-oxidation multifunctional protein MFP-a OS=Cucumis sativus PE=1 SV=1	COG1024	Enoyl-CoA hydratase/carnithine racemase	K12663	vvi:100249010	delta(3,5)-Delta(2,4)-dienoyl-CoA isomerase [EC:5.3.3.-]	GO:0006457//protein folding;GO:0006635//fatty acid beta-oxidation;GO:0000413//protein peptidyl-prolyl isomerization	GO:0051750//delta3,5-delta2,4-dienoyl-CoA isomerase activity;GO:0003755//peptidyl-prolyl cis-trans isomerase activity;GO:0004300//enoyl-CoA hydratase activity	GO:0005777//peroxisome;GO:0005739//mitochondrion
243	CSE_Unigene14307	SW_Unigene11028	-	-	+(Mostly)	630	0.987	8	4	4	0.290307	0.0843026	gi|147864421|emb|CAN82642.1|	hypothetical protein VITISV_024902 [Vitis vinifera]	gi|359473834|ref|XM_002272026.2|	PREDICTED: Vitis vinifera uncharacterized LOC100264392, transcript variant 2 (LOC100264392), mRNA	sp|F4KF27|MDA2_ARATH	Mediator-associated protein 2 OS=Arabidopsis thaliana GN=At5g64680 PE=1 SV=1	-	-	-	-	-	-	-	-
244	CSE_Unigene20231	SW_Unigene5338	-	-	+(Mostly)	1896	0.986	26	16	10	0.248926	0.000470394	gi|225425292|ref|XP_002272176.1|	PREDICTED: probable peptide/nitrate transporter At5g13400 [Vitis vinifera]	gi|359473835|ref|XM_002272140.2|	PREDICTED: Vitis vinifera probable peptide/nitrate transporter At5g13400-like (LOC100259213), mRNA	sp|Q9LYR6|PTR49_ARATH	Probable peptide/nitrate transporter At5g13400 OS=Arabidopsis thaliana GN=At5g13400 PE=2 SV=1	COG3104	Dipeptide/tripeptide permease	K14638	smo:SELMODRAFT_448814	solute carrier family 15 (peptide/histidine transporter), member 3/4	GO:0006857//oligopeptide transport	GO:0005215//transporter activity	GO:0016021//integral to membrane;GO:0005886//plasma membrane
245	CSE_Unigene16769	SW_Unigene6816	-	-	+(Mostly)	861	0.995	4	4	NA	0	NA	gi|225425356|ref|XP_002275396.1|	PREDICTED: U2 small nuclear ribonucleoprotein A&apos; [Vitis vinifera] >gi|296085571|emb|CBI29303.3| unnamed protein product [Vitis vinifera]	gi|225425355|ref|XM_002275360.1|	PREDICTED: Vitis vinifera U2 small nuclear ribonucleoprotein A'-like (LOC100264276), mRNA	sp|P43333|RU2A_ARATH	U2 small nuclear ribonucleoprotein A' OS=Arabidopsis thaliana GN=At1g09760 PE=2 SV=2	COG4886	Leucine-rich repeat (LRR) protein	K11092	vvi:100264276	U2 small nuclear ribonucleoprotein A'	GO:0009409//response to cold;GO:0000398//mRNA splicing, via spliceosome	GO:0003676//nucleic acid binding	GO:0005730//nucleolus;GO:0015030//Cajal body;GO:0009507//chloroplast;GO:0030529//ribonucleoprotein complex
246	CSE_Unigene15904	SW_Unigene21971	-	-	+(Mostly)	1305	0.995	7	4	3	0.228622	0.0568635	gi|225462932|ref|XP_002266329.1|	PREDICTED: dual specificity protein kinase pyk1 isoform 1 [Vitis vinifera] >gi|296087790|emb|CBI35046.3| unnamed protein product [Vitis vinifera]	gi|359473461|ref|XM_002266293.2|	PREDICTED: Vitis vinifera dual specificity protein kinase pyk1-like, transcript variant 1 (LOC100242045), mRNA	sp|Q9FPR3|EDR1_ARATH	Serine/threonine-protein kinase EDR1 OS=Arabidopsis thaliana GN=EDR1 PE=1 SV=1	COG0515	Serine/threonine protein kinase	K04424	aly:ARALYDRAFT_909157	sterile alpha motif and leucine zipper containing kinase AZK [EC:2.7.11.25]	GO:0031348//negative regulation of defense response;GO:0009867//jasmonic acid mediated signaling pathway;GO:0009862//systemic acquired resistance, salicylic acid mediated signaling pathway;GO:0009414//response to water deprivation;GO:0010363//regulation of plant-type hypersensitive response;GO:0009734//auxin mediated signaling pathway;GO:0006612//protein targeting to membrane;GO:0050832//defense …	GO:0004715//non-membrane spanning protein tyrosine kinase activity;GO:0004712//protein serine/threonine/tyrosine kinase activity;GO:0004674//protein serine/threonine kinase activity;GO:0005524//ATP binding	GO:0005829//cytosol;GO:0005634//nucleus
247	CSE_CL4854_Contig1	SW_Unigene8660	-	-	+(Mostly)	1449	0.993	10	2	8	1.58402	0.69871	gi|225462926|ref|XP_002267249.1|	PREDICTED: probable ribulose-1,5 bisphosphate carboxylase/oxygenase large subunit N-methyltransferase, chloroplastic [Vitis vinifera] >gi|296087793|emb|CBI35049.3| unnamed protein product [Vitis vinifera]	gi|225462925|ref|XM_002267213.1|	PREDICTED: Vitis vinifera probable ribulose-1,5 bisphosphate carboxylase/oxygenase large subunit N-methyltransferase, chloroplastic-like (LOC100243771), mRNA	sp|Q9XI84|RBCMT_ARATH	[Fructose-bisphosphate aldolase]-lysine N-methyltransferase, chloroplastic OS=Arabidopsis thaliana GN=LSMT-L PE=1 SV=1	-	-	K00592	aly:ARALYDRAFT_471564	[ribulose-bisphosphate carboxylase]-lysine N-methyltransferase [EC:2.1.1.127]	GO:0006655//phosphatidylglycerol biosynthetic process;GO:0009793//embryo development ending in seed dormancy;GO:0019252//starch biosynthetic process;GO:0019288//isopentenyl diphosphate biosynthetic process, mevalonate-independent pathway;GO:0009902//chloroplast relocation;GO:0000023//maltose metabolic process;GO:0018023//peptidyl-lysine trimethylation;GO:0016226//iron-sulfur cluster assembly;GO:0…	GO:0030785//[ribulose-bisphosphate carboxylase]-lysine N-methyltransferase activity;GO:0018024//histone-lysine N-methyltransferase activity	GO:0009570//chloroplast stroma
248	CSE_Unigene3959	SW_Unigene26304	-	-	+(Mostly)	459	0.503	228	74.8469	153.153	0.18219	9.54088e-11	gi|359473521|ref|XP_002273398.2|	PREDICTED: putative pentatricopeptide repeat-containing protein At2g02150-like [Vitis vinifera]	gi|147803291|emb|AM487966.2|	Vitis vinifera contig VV78X206601.18, whole genome shotgun sequence	sp|Q9ZUA2|PP141_ARATH	Pentatricopeptide repeat-containing protein At2g01740 OS=Arabidopsis thaliana GN=At2g01740 PE=3 SV=1	-	-	K15336	vvi:100259391	tRNA (cytosine38-C5)-methyltransferase [EC:2.1.1.204]	-	-	GO:0005739//mitochondrion
249	CSE_Unigene6996	SW_Unigene26890	-	-	+(Mostly)	621	0.992	5	5	NA	0	NA	gi|225425890|ref|XP_002270903.1|	PREDICTED: mitotic spindle checkpoint protein MAD2 isoform 1 [Vitis vinifera] >gi|297738345|emb|CBI27546.3| unnamed protein product [Vitis vinifera]	gi|359473707|ref|XM_002270867.2|	PREDICTED: Vitis vinifera mitotic spindle checkpoint protein MAD2-like, transcript variant 1 (LOC100254488), mRNA	sp|Q9LU93|MAD2_ARATH	Mitotic spindle checkpoint protein MAD2 OS=Arabidopsis thaliana GN=MAD2 PE=2 SV=1	-	-	K02537	vvi:100254488	mitotic spindle assembly checkpoint protein MAD2	GO:0051788//response to misfolded protein;GO:0043161//proteasomal ubiquitin-dependent protein catabolic process;GO:0008283//cell proliferation;GO:0051301//cell division;GO:0051510//regulation of unidimensional cell growth;GO:0042023//DNA endoreduplication;GO:0048235//pollen sperm cell differentiation;GO:0016572//histone phosphorylation;GO:0007094//mitotic spindle assembly checkpoint;GO:0043248//p…	GO:0005515//protein binding;GO:0003677//DNA binding	GO:0010369//chromocenter;GO:0005737//cytoplasm;GO:0000776//kinetochore;GO:0005635//nuclear envelope
250	CSE_CL205_Contig1	SW_CL2934_Contig1	-	-	+(Mostly)	1152	0.997	4	NA	4	NA	NA	gi|359473738|ref|XP_002272591.2|	PREDICTED: LOW QUALITY PROTEIN: probable glycosyltransferase At5g25310-like [Vitis vinifera]	gi|359473737|ref|XM_002272555.2|	PREDICTED: Vitis vinifera probable glycosyltransferase At5g25310-like (LOC100260931), mRNA	sp|Q9SSE8|GLYT1_ARATH	Probable glycosyltransferase At3g07620 OS=Arabidopsis thaliana GN=At3g07620 PE=3 SV=1	-	-	-	-	-	-	GO:0003824//catalytic activity	GO:0016020//membrane;GO:0016023//cytoplasmic membrane-bounded vesicle;GO:0005794//Golgi apparatus
251	CSE_CL7421_Contig1	SW_Unigene7603	-	-	+(Mostly)	1080	0.993	8	5	3	0.22106	0.0379747	gi|225425416|ref|XP_002277768.1|	PREDICTED: alpha-ketoglutarate-dependent dioxygenase alkB [Vitis vinifera] >gi|297738457|emb|CBI27658.3| unnamed protein product [Vitis vinifera]	gi|225425415|ref|XM_002277732.1|	PREDICTED: Vitis vinifera alpha-ketoglutarate-dependent dioxygenase alkB-like (LOC100243727), mRNA	sp|Q9SA98|ALKBH_ARATH	Alpha-ketoglutarate-dependent dioxygenase alkB OS=Arabidopsis thaliana GN=At1g11780 PE=2 SV=2	COG3145	Alkylated DNA repair protein	K10765	vvi:100243727	alkylated DNA repair protein alkB homolog 1 [EC:1.14.11.- 4.2.99.18]	GO:0055114//oxidation-reduction process	GO:0016706//oxidoreductase activity, acting on paired donors, with incorporation or reduction of molecular oxygen, 2-oxoglutarate as one donor, and incorporation of one atom each of oxygen into both donors	GO:0005634//nucleus
252	CSE_Unigene13545	SW_Unigene22083	-	-	+(Mostly)	1131	0.985	11	7	4	0.224619	0.0155446	gi|359472593|ref|XP_002281277.2|	PREDICTED: uncharacterized protein LOC100261060 [Vitis vinifera]	gi|359472592|ref|XM_002281241.2|	PREDICTED: Vitis vinifera uncharacterized LOC100261060 (LOC100261060), mRNA	sp|Q8GUU2|RIE1_ARATH	E3 ubiquitin protein ligase RIE1 OS=Arabidopsis thaliana GN=RIE1 PE=2 SV=1	COG5540	RING-finger-containing ubiquitin ligase	K13148	vvi:100261060	integrator complex subunit 11 [EC:3.1.27.-]	GO:0006661//phosphatidylinositol biosynthetic process	GO:0016787//hydrolase activity;GO:0008270//zinc ion binding	GO:0005886//plasma membrane;GO:0005774//vacuolar membrane
253	CSE_Unigene6460	SW_Unigene8147	-	-	+(Mostly)	570	0.996	2	1	1	0.344196	0.382304	gi|225424301|ref|XP_002284666.1|	PREDICTED: uncharacterized protein LOC100259429 [Vitis vinifera] >gi|297737670|emb|CBI26871.3| unnamed protein product [Vitis vinifera]	gi|359472844|ref|XM_002284630.2|	PREDICTED: Vitis vinifera uncharacterized LOC100259429 (LOC100259429), mRNA	-	-	-	-	-	-	-	GO:0006098//pentose-phosphate shunt;GO:0009773//photosynthetic electron transport in photosystem I;GO:0030003//cellular cation homeostasis;GO:0070838//divalent metal ion transport	GO:0016655//oxidoreductase activity, acting on NAD(P)H, quinone or similar compound as acceptor	GO:0042651//thylakoid membrane
254	CSE_Unigene15444	SW_Unigene11983	-	-	+(Mostly)	849	0.998	2	2	NA	0	NA	gi|225424246|ref|XP_002284469.1|	PREDICTED: phytanoyl-CoA dioxygenase domain-containing protein 1 [Vitis vinifera] >gi|297737693|emb|CBI26894.3| unnamed protein product [Vitis vinifera]	gi|359472863|ref|XM_002284433.2|	PREDICTED: Vitis vinifera phytanoyl-CoA dioxygenase domain-containing protein 1-like (LOC100254163), mRNA	-	-	COG5285	Protein involved in biosynthesis of mitomycin antibiotics/polyketide fumonisin	K01190	ota:Ot07g03490	beta-galactosidase [EC:3.2.1.23]	-	GO:0048244//phytanoyl-CoA dioxygenase activity;GO:0016702//oxidoreductase activity, acting on single donors with incorporation of molecular oxygen, incorporation of two atoms of oxygen	GO:0005886//plasma membrane
255	CSE_Unigene13063	SW_CL6064_Contig1	-	-	+(Mostly)	855	0.995	4	2	2	0.315529	0.242584	gi|225424003|ref|XP_002282829.1|	PREDICTED: nuclease S1 isoform 1 [Vitis vinifera] >gi|297737807|emb|CBI27008.3| unnamed protein product [Vitis vinifera]	gi|225424002|ref|XM_002282793.1|	PREDICTED: Vitis vinifera nuclease S1-like, transcript variant 1 (LOC100266396), mRNA	sp|Q9C9G4|ENDO2_ARATH	Endonuclease 2 OS=Arabidopsis thaliana GN=ENDO2 PE=2 SV=1	-	-	-	-	-	GO:0006308//DNA catabolic process	GO:0004519//endonuclease activity;GO:0003676//nucleic acid binding	GO:0016023//cytoplasmic membrane-bounded vesicle
256	CSE_Unigene11426	SW_Unigene22108	-	-	+(Mostly)	783	0.997	2	1	1	0.378397	0.399142	gi|359472952|ref|XP_002279311.2|	PREDICTED: 50S ribosomal protein L15, chloroplastic-like [Vitis vinifera] >gi|297737813|emb|CBI27014.3| unnamed protein product [Vitis vinifera]	gi|349719749|emb|FQ381567.1|	Vitis vinifera clone SS0ABP1YE08	sp|P25873|RK15_ARATH	50S ribosomal protein L15, chloroplastic OS=Arabidopsis thaliana GN=RPL15 PE=1 SV=2	COG0200	Ribosomal protein L15	K02876	vvi:100268043	large subunit ribosomal protein L15	GO:0006354//DNA-dependent transcription, elongation;GO:0006412//translation	GO:0003735//structural constituent of ribosome	GO:0009941//chloroplast envelope;GO:0000311//plastid large ribosomal subunit;GO:0009570//chloroplast stroma
257	CSE_Unigene16918	SW_Unigene12181	-	-	+(Mostly)	1890	0.995	9	5	4	0.338557	0.0963341	gi|225423893|ref|XP_002281668.1|	PREDICTED: Di-glucose binding protein with Leucine-rich repeat domain-like [Vitis vinifera] >gi|297737862|emb|CBI27063.3| unnamed protein product [Vitis vinifera]	gi|359472986|ref|XM_002281632.2|	PREDICTED: Vitis vinifera Di-glucose binding protein with Leucine-rich repeat domain-like (LOC100267996), mRNA	sp|Q9FZB8|Y5181_ARATH	Probable LRR receptor-like serine/threonine-protein kinase At1g51810 OS=Arabidopsis thaliana GN=At1g51810 PE=2 SV=1	-	-	K13420	aly:ARALYDRAFT_356368	LRR receptor-like serine/threonine-protein kinase FLS2 [EC:2.7.11.1]	GO:0016310//phosphorylation	GO:0016301//kinase activity	GO:0005802//trans-Golgi network;GO:0016023//cytoplasmic membrane-bounded vesicle;GO:0005773//vacuole;GO:0005794//Golgi apparatus;GO:0005768//endosome;GO:0005886//plasma membrane
258	CSE_Unigene16484	SW_Unigene8166	-	-	+(Mostly)	1719	0.995	8	7	1	0.0451923	0.00028847	gi|225423883|ref|XP_002281563.1|	PREDICTED: serine/threonine-protein kinase STN7, chloroplastic isoform 1 [Vitis vinifera]	gi|359472992|ref|XM_002281527.2|	PREDICTED: Vitis vinifera serine/threonine-protein kinase STN7, chloroplastic-like, transcript variant 1 (LOC100255959), mRNA	sp|Q9S713|STT7_ARATH	Serine/threonine-protein kinase STN7, chloroplastic OS=Arabidopsis thaliana GN=STN7 PE=1 SV=1	COG0515	Serine/threonine protein kinase	K08282	cme:CMS463C	non-specific serine/threonine protein kinase [EC:2.7.11.1]	GO:0006468//protein phosphorylation;GO:0007623//circadian rhythm;GO:0015996//chlorophyll catabolic process;GO:0042548//regulation of photosynthesis, light reaction	GO:0004674//protein serine/threonine kinase activity;GO:0005524//ATP binding	GO:0009507//chloroplast
259	CSE_CL1793_Contig1	SW_Unigene7266	-	-	+(Mostly)	3633	0.994	20	9	11	0.359018	0.0230907	gi|359472721|ref|XP_002277950.2|	PREDICTED: tRNA-specific adenosine deaminase, chloroplastic-like [Vitis vinifera]	gi|359472720|ref|XM_002277914.2|	PREDICTED: Vitis vinifera tRNA-specific adenosine deaminase, chloroplastic-like (LOC100259373), mRNA	sp|Q9S7I0|TADA_ARATH	tRNA-specific adenosine deaminase, chloroplastic OS=Arabidopsis thaliana GN=TADA PE=1 SV=1	COG0590	Cytosine/adenosine deaminases	K15441	ota:Ot05g01940	tRNA-specific adenosine deaminase 2 [EC:3.5.4.-]	GO:0008152//metabolic process	GO:0016787//hydrolase activity	GO:0043231//intracellular membrane-bounded organelle
260	CSE_CL1704_Contig1	SW_CL1535_Contig3	-	-	+(Mostly)	702	0.989	8	4	4	0.268257	0.0685883	gi|225423741|ref|XP_002277028.1|	PREDICTED: uncharacterized protein ypgQ [Vitis vinifera] >gi|147836213|emb|CAN75429.1| hypothetical protein VITISV_003303 [Vitis vinifera]	gi|225423740|ref|XM_002276992.1|	PREDICTED: Vitis vinifera uncharacterized LOC100249303 (LOC100249303), mRNA	-	-	COG1418	Predicted HD superfamily hydrolase	K06950	vvi:100249303	uncharacterized protein	GO:0008152//metabolic process	GO:0046872//metal ion binding;GO:0008081//phosphoric diester hydrolase activity	GO:0005634//nucleus
261	CSE_Unigene18254	SW_Unigene13634	-	-	+(Mostly)	1590	0.988	13	9	4	0.174811	0.00259804	gi|225423706|ref|XP_002277516.1|	PREDICTED: lecithine-cholesterol acyltransferase-like 4 [Vitis vinifera] >gi|297737965|emb|CBI27166.3| unnamed protein product [Vitis vinifera]	gi|225423705|ref|XM_002277480.1|	PREDICTED: Vitis vinifera lecithine-cholesterol acyltransferase-like 4 (LOC100255965), mRNA	sp|Q71N54|LCAT4_ARATH	Lecithine-cholesterol acyltransferase-like 4 OS=Arabidopsis thaliana GN=LCAT4 PE=2 SV=1	-	-	K06129	vvi:100260799	lysophospholipase III [EC:3.1.1.5]	GO:0006944//cellular membrane fusion;GO:0048193//Golgi vesicle transport;GO:0009395//phospholipid catabolic process	GO:0004607//phosphatidylcholine-sterol O-acyltransferase activity;GO:0004620//phospholipase activity	GO:0005829//cytosol
262	CSE_Unigene805	SW_Unigene8768	-	-	+(Mostly)	1104	0.999	1	NA	1	NA	NA	gi|225423700|ref|XP_002276697.1|	PREDICTED: phosphatase IMPL1, chloroplastic [Vitis vinifera] >gi|297737968|emb|CBI27169.3| unnamed protein product [Vitis vinifera]	gi|225423699|ref|XM_002276661.1|	PREDICTED: Vitis vinifera phosphatase IMPL1, chloroplastic-like (LOC100249170), mRNA	sp|Q94F00|IMPL1_ARATH	Phosphatase IMPL1, chloroplastic OS=Arabidopsis thaliana GN=IMPL1 PE=1 SV=2	COG0483	Archaeal fructose-1,6-bisphosphatase and related enzymes of inositol monophosphatase family	K01092	vvi:100249170	myo-inositol-1(or 4)-monophosphatase [EC:3.1.3.25]	GO:0006790//sulfur compound metabolic process;GO:0019243//methylglyoxal catabolic process to D-lactate;GO:0000023//maltose metabolic process;GO:0019252//starch biosynthetic process;GO:0046854//phosphatidylinositol phosphorylation	GO:0052833//inositol monophosphate 4-phosphatase activity;GO:0008441//3'(2'),5'-bisphosphate nucleotidase activity;GO:0052832//inositol monophosphate 3-phosphatase activity;GO:0008934//inositol monophosphate 1-phosphatase activity	GO:0005829//cytosol;GO:0005739//mitochondrion;GO:0009570//chloroplast stroma
263	CSE_Unigene16837	SW_Unigene1584	-	-	+(Mostly)	1860	0.994	12	8	4	0.17136	0.00332743	gi|359472534|ref|XP_002274321.2|	PREDICTED: pentatricopeptide repeat-containing protein At1g26460, mitochondrial-like [Vitis vinifera] >gi|297738080|emb|CBI27281.3| unnamed protein product [Vitis vinifera]	gi|359472533|ref|XM_002274285.2|	PREDICTED: Vitis vinifera pentatricopeptide repeat-containing protein At1g26460, mitochondrial-like (LOC100249185), mRNA	sp|Q9FZD1|PPR58_ARATH	Pentatricopeptide repeat-containing protein At1g26460, mitochondrial OS=Arabidopsis thaliana GN=At1g26460 PE=1 SV=1	-	-	K15336	vvi:100259391	tRNA (cytosine38-C5)-methyltransferase [EC:2.1.1.204]	GO:0009220//pyrimidine ribonucleotide biosynthetic process	-	GO:0005739//mitochondrion
264	CSE_Unigene13327	SW_Unigene22662	-	-	+(Mostly)	1134	0.992	9	4	5	0.43599	0.183411	gi|359473178|ref|XP_003631255.1|	PREDICTED: quinone oxidoreductase-like protein At1g23740, chloroplastic-like [Vitis vinifera]	gi|359473177|ref|XM_003631207.1|	PREDICTED: Vitis vinifera quinone oxidoreductase-like protein At1g23740, chloroplastic-like (LOC100852555), mRNA	sp|Q9ZUC1|QORL_ARATH	Quinone oxidoreductase-like protein At1g23740, chloroplastic OS=Arabidopsis thaliana GN=At1g23740 PE=1 SV=2	COG0604	NADPH:quinone reductase and related Zn-dependent oxidoreductases	K00344	osa:4331066	NADPH2:quinone reductase [EC:1.6.5.5]	GO:0009072//aromatic amino acid family metabolic process;GO:0000096//sulfur amino acid metabolic process;GO:0016117//carotenoid biosynthetic process;GO:0006636//unsaturated fatty acid biosynthetic process;GO:0010264//myo-inositol hexakisphosphate biosynthetic process;GO:0044272//sulfur compound biosynthetic process;GO:0019288//isopentenyl diphosphate biosynthetic process, mevalonate-independent p…	GO:0035671//enone reductase activity;GO:0008270//zinc ion binding;GO:0000166//nucleotide binding;GO:0035798//2-alkenal reductase (NADP+) activity;GO:0003960//NADPH:quinone reductase activity	GO:0009941//chloroplast envelope;GO:0048046//apoplast;GO:0010319//stromule;GO:0009570//chloroplast stroma;GO:0009579//thylakoid
265	CSE_CL5210_Contig2	SW_CL8626_Contig1	-	-	+(Mostly)	900	0.99	9	4	5	0.476927	0.219504	gi|225425628|ref|XP_002268605.1|	PREDICTED: mitochondrial uncoupling protein 4 [Vitis vinifera]	gi|225425627|ref|XM_002268569.1|	PREDICTED: Vitis vinifera mitochondrial uncoupling protein 4-like (LOC100263686), mRNA	sp|Q9XI74|PUMP3_ARATH	Mitochondrial uncoupling protein 3 OS=Arabidopsis thaliana GN=PUMP3 PE=2 SV=1	-	-	K15112	vvi:100263686	solute carrier family 25 (mitochondrial uncoupling protein), member 27	GO:0055085//transmembrane transport;GO:0006839//mitochondrial transport	GO:0005215//transporter activity	GO:0005743//mitochondrial inner membrane;GO:0016021//integral to membrane
266	CSE_CL3766_Contig1	SW_CL2106_Contig2	-	-	+(Mostly)	900	0.924	5	1	4	1.51775	0.798617	gi|225425648|ref|XP_002272557.1|	PREDICTED: methyltransferase-like protein 7A [Vitis vinifera] >gi|296086353|emb|CBI31942.3| unnamed protein product [Vitis vinifera]	gi|359473306|ref|XM_002272521.2|	PREDICTED: Vitis vinifera methyltransferase-like protein 7A (LOC100256916), mRNA	-	-	COG0500	SAM-dependent methyltransferases	-	-	-	GO:0032259//methylation	GO:0008168//methyltransferase activity	GO:0009536//plastid
267	CSE_Unigene18478	SW_Unigene7403	-	-	+(Mostly)	1008	0.99	10	7	3	0.150806	0.00473953	gi|225425714|ref|XP_002275397.1|	PREDICTED: FAM203 family protein DDB_G0276861 [Vitis vinifera] >gi|296086382|emb|CBI31971.3| unnamed protein product [Vitis vinifera]	gi|359473448|ref|XM_002275361.2|	PREDICTED: Vitis vinifera FAM203 family protein DDB_G0276861-like (LOC100248279), mRNA	-	-	-	-	-	-	-	GO:0006626//protein targeting to mitochondrion	-	GO:0005634//nucleus
268	CSE_Unigene19650	SW_Unigene11752	-	-	+(Mostly)	1728	0.988	17	8	9	0.406721	0.0876495	gi|225425734|ref|XP_002271313.1|	PREDICTED: pentatricopeptide repeat-containing protein At1g26900, mitochondrial-like [Vitis vinifera]	gi|147820327|emb|AM430358.2|	Vitis vinifera contig VV78X164448.23, whole genome shotgun sequence	sp|Q9ZVG8|PPR60_ARATH	Pentatricopeptide repeat-containing protein At1g26900, mitochondrial OS=Arabidopsis thaliana GN=PCMP-E54 PE=2 SV=1	-	-	K15271	rcu:RCOM_1095670	ATP-dependent DNA helicase HFM1/MER3 [EC:3.6.4.12]	-	-	GO:0005739//mitochondrion
269	CSE_Unigene17018	SW_Unigene12721	-	-	+(Mostly)	807	0.99	8	2	6	1.06214	0.912522	gi|225424922|ref|XP_002277278.1|	PREDICTED: uncharacterized protein LOC100253653 [Vitis vinifera] >gi|296086421|emb|CBI32010.3| unnamed protein product [Vitis vinifera]	gi|225424921|ref|XM_002277242.1|	PREDICTED: Vitis vinifera uncharacterized LOC100253653 (LOC100253653), mRNA	sp|Q9LL85|WHY1_SOLTU	Single-stranded DNA-bindig protein WHY1, chloroplastic OS=Solanum tuberosum GN=WHY1 PE=1 SV=1	-	-	-	-	-	GO:0032211//negative regulation of telomere maintenance via telomerase;GO:0050832//defense response to fungus;GO:0045893//positive regulation of transcription, DNA-dependent;GO:0006281//DNA repair	GO:0042162//telomeric DNA binding;GO:0003697//single-stranded DNA binding;GO:0003700//sequence-specific DNA binding transcription factor activity	GO:0009508//plastid chromosome;GO:0009570//chloroplast stroma;GO:0005634//nucleus
270	CSE_Unigene14911	SW_Unigene15647	-	-	+(Mostly)	1404	0.992	11	6	5	0.223577	0.0157213	gi|225424865|ref|XP_002274190.1|	PREDICTED: tetratricopeptide repeat protein 38 [Vitis vinifera] >gi|296086448|emb|CBI32037.3| unnamed protein product [Vitis vinifera]	gi|225424864|ref|XM_002274154.1|	PREDICTED: Vitis vinifera tetratricopeptide repeat protein 38-like (LOC100262208), mRNA	-	-	-	-	-	-	-	-	-	GO:0005634//nucleus
271	CSE_Unigene15070	SW_CL5780_Contig1	-	-	+(Mostly)	873	0.994	5	4	1	0.0835083	0.0149792	gi|225424815|ref|XP_002267988.1|	PREDICTED: uncharacterized protein LOC100255235 [Vitis vinifera] >gi|296086476|emb|CBI32065.3| unnamed protein product [Vitis vinifera]	gi|359473312|ref|XM_002267952.2|	PREDICTED: Vitis vinifera uncharacterized LOC100255235 (LOC100255235), mRNA	-	-	-	-	-	-	-	GO:0010190//cytochrome b6f complex assembly;GO:0010207//photosystem II assembly	-	GO:0009507//chloroplast
272	CSE_Unigene6325	SW_Unigene25605	-	-	+(Mostly)	606	0.983	10	2	8	1.22574	0.932182	gi|225424801|ref|XP_002271090.1|	PREDICTED: germin-like protein 3-1 [Vitis vinifera] >gi|296086484|emb|CBI32073.3| unnamed protein product [Vitis vinifera]	gi|225424800|ref|XM_002271054.1|	PREDICTED: Vitis vinifera germin-like protein 3-1 (LOC100246738), mRNA	sp|P92998|GL11_ARATH	Germin-like protein subfamily 1 member 1 OS=Arabidopsis thaliana GN=GLP7 PE=2 SV=2	-	-	-	-	-	-	GO:0016491//oxidoreductase activity;GO:0045735//nutrient reservoir activity;GO:0030145//manganese ion binding	GO:0048046//apoplast
273	CSE_Unigene6594	SW_Unigene11124	-	-	+(Mostly)	1152	0.988	14	3	11	1.65847	0.562771	gi|296086506|emb|CBI32095.3|	unnamed protein product [Vitis vinifera]	gi|359473411|ref|XM_002266563.2|	PREDICTED: Vitis vinifera uncharacterized LOC100255243 (LOC100255243), mRNA	sp|Q9SSR1|Y1259_ARATH	DCC family protein At1g52590, chloroplastic OS=Arabidopsis thaliana GN=At1g52590 PE=1 SV=1	COG3011	Uncharacterized protein conserved in bacteria	-	-	-	-	-	-
274	CSE_Unigene13397	SW_Unigene7073	-	-	+(Mostly)	459	0.985	7	2	5	0.553334	0.374236	gi|225424742|ref|XP_002267219.1|	PREDICTED: MLP-like protein 423 [Vitis vinifera] >gi|296086515|emb|CBI32104.3| unnamed protein product [Vitis vinifera]	gi|359473333|ref|XM_002267183.2|	PREDICTED: Vitis vinifera MLP-like protein 423 (LOC100243241), mRNA	sp|Q93VR4|ML423_ARATH	MLP-like protein 423 OS=Arabidopsis thaliana GN=MLP423 PE=1 SV=1	-	-	K14496	aly:ARALYDRAFT_903051	abscisic acid receptor PYR/PYL family	GO:0009607//response to biotic stimulus;GO:0006952//defense response	-	GO:0016020//membrane
275	CSE_CL634_Contig3	SW_Unigene2064	-	-	+(Mostly)	765	0.995	4	4	NA	0	NA	gi|359474379|ref|XP_002265958.2|	PREDICTED: uncharacterized protein LOC100250522 isoform 2 [Vitis vinifera]	gi|349716079|emb|FQ392086.1|	Vitis vinifera clone SS0AFA7YI22	sp|Q8H1Q1|TL225_ARATH	Thylakoid lumenal protein At1g12250, chloroplastic OS=Arabidopsis thaliana GN=At1g12250 PE=1 SV=1	COG1357	Uncharacterized low-complexity proteins	-	-	-	-	-	GO:0005576//extracellular region;GO:0009535//chloroplast thylakoid membrane;GO:0009543//chloroplast thylakoid lumen
276	CSE_Unigene17026	SW_CL6924_Contig1	-	-	+(Mostly)	1605	0.996	7	4	3	0.26341	0.0804653	gi|225426989|ref|XP_002270066.1|	PREDICTED: chaperone protein dnaJ 13 [Vitis vinifera] >gi|297741195|emb|CBI31926.3| unnamed protein product [Vitis vinifera]	gi|225426988|ref|XM_002270030.1|	PREDICTED: Vitis vinifera chaperone protein dnaJ 13-like (LOC100259128), mRNA	sp|Q39079|DNJ13_ARATH	Chaperone protein dnaJ 13 OS=Arabidopsis thaliana GN=ATJ13 PE=1 SV=2	COG0484	DnaJ-class molecular chaperone with C-terminal Zn finger domain	K09531	vvi:100259128	DnaJ homolog subfamily C member 11	GO:0006457//protein folding;GO:0009644//response to high light intensity;GO:0055122//response to very low light intensity stimulus;GO:0010228//vegetative to reproductive phase transition of meristem	GO:0031072//heat shock protein binding	GO:0009507//chloroplast
277	CSE_Unigene13109	SW_Unigene11878	-	-	+(Mostly)	729	0.993	5	3	2	0.190867	0.0770789	gi|225426981|ref|XP_002269360.1|	PREDICTED: peroxisome biogenesis protein 19-1 [Vitis vinifera] >gi|297741197|emb|CBI31928.3| unnamed protein product [Vitis vinifera]	gi|225426980|ref|XM_002269324.1|	PREDICTED: Vitis vinifera peroxisome biogenesis protein 19-1-like (LOC100242021), mRNA	sp|Q94EI3|PE192_ARATH	Peroxisome biogenesis protein 19-2 OS=Arabidopsis thaliana GN=PEX19-2 PE=1 SV=1	-	-	K13337	vvi:100242021	peroxin-19	GO:0007031//peroxisome organization	GO:0042802//identical protein binding	GO:0005777//peroxisome;GO:0005829//cytosol;GO:0005634//nucleus
278	CSE_Unigene7137	SW_Unigene13626	-	-	+(Mostly)	1110	0.99	11	6	5	0.321651	0.0576765	gi|296082848|emb|CBI22149.3|	unnamed protein product [Vitis vinifera]	gi|349709719|emb|FQ395979.1|	Vitis vinifera clone SS0AFA12YM07	-	-	COG0354	Predicted aminomethyltransferase related to GcvT	K06980	rcu:RCOM_1680510		GO:0006546//glycine catabolic process;GO:0019243//methylglyoxal catabolic process to D-lactate;GO:0016226//iron-sulfur cluster assembly;GO:0032259//methylation	GO:0004047//aminomethyltransferase activity	GO:0005759//mitochondrial matrix
279	CSE_Unigene15123	SW_Unigene15648	-	-	+(Mostly)	1227	0.994	4	1	3	0.926547	0.65688	gi|225470319|ref|XP_002267811.1|	PREDICTED: maspardin [Vitis vinifera]	gi|359474318|ref|XM_002267775.2|	PREDICTED: Vitis vinifera maspardin-like (LOC100249980), mRNA	-	-	-	-	-	-	-	-	GO:0003824//catalytic activity	GO:0005737//cytoplasm
280	CSE_Unigene16296	SW_Unigene18539	-	-	+(Mostly)	2262	0.989	22	14	8	0.191039	0.000160149	gi|225427093|ref|XP_002276652.1|	PREDICTED: uncharacterized protein LOC100260823 [Vitis vinifera]	gi|359474527|ref|XM_002276616.2|	PREDICTED: Vitis vinifera uncharacterized LOC100260823 (LOC100260823), mRNA	-	-	-	-	-	-	-	GO:0046777//protein autophosphorylation;GO:0009965//leaf morphogenesis;GO:0010155//regulation of proton transport;GO:0030154//cell differentiation	-	GO:0009570//chloroplast stroma;GO:0005634//nucleus
281	CSE_Unigene16443	SW_Unigene22414	-	-	+(Mostly)	1152	0.98	17	6	11	0.778627	0.599386	gi|225427112|ref|XP_002276479.1|	PREDICTED: probable plastid-lipid-associated protein 3, chloroplastic-like [Vitis vinifera]	gi|349705779|emb|FQ384318.1|	Vitis vinifera clone SS0AAG1YP12	sp|Q9ZP40|PG1_PEA	Plastoglobulin-1, chloroplastic OS=Pisum sativum GN=PG1 PE=1 SV=1	COG0455	ATPases involved in chromosome partitioning	K01115	vcn:VOLCADRAFT_99471	phospholipase D [EC:3.1.4.4]	-	-	GO:0009507//chloroplast
282	CSE_Unigene17797	SW_Unigene21912	-	-	+(Mostly)	2274	0.996	10	9	1	0.0439119	8.68619e-05	gi|225427163|ref|XP_002278896.1|	PREDICTED: uncharacterized membrane protein At4g09580 [Vitis vinifera]	gi|225427162|ref|XM_002278860.1|	PREDICTED: Vitis vinifera uncharacterized LOC100264293 (LOC100264293), mRNA	sp|Q8L586|Y4958_ARATH	Uncharacterized membrane protein At4g09580 OS=Arabidopsis thaliana GN=At4g09580 PE=1 SV=1	COG0398	Uncharacterized conserved protein	-	-	-	GO:0006661//phosphatidylinositol biosynthetic process	-	-
283	CSE_Unigene16089	SW_Unigene5317	-	-	+(Mostly)	861	0.99	9	6	3	0.155652	0.00786571	gi|225427185|ref|XP_002279685.1|	PREDICTED: 29 kDa ribonucleoprotein B, chloroplastic [Vitis vinifera]	gi|359474553|ref|XM_002279649.2|	PREDICTED: Vitis vinifera 29 kDa ribonucleoprotein B, chloroplastic-like (LOC100243747), mRNA	sp|P19683|ROC4_NICSY	31 kDa ribonucleoprotein, chloroplastic OS=Nicotiana sylvestris PE=1 SV=1	COG0724	RNA-binding proteins (RRM domain)	K11294	smo:SELMODRAFT_15428	nucleolin	GO:0009902//chloroplast relocation;GO:0006364//rRNA processing;GO:0019288//isopentenyl diphosphate biosynthetic process, mevalonate-independent pathway;GO:0015995//chlorophyll biosynthetic process;GO:0010027//thylakoid membrane organization;GO:0042793//transcription from plastid promoter;GO:0015979//photosynthesis	GO:0003676//nucleic acid binding	GO:0009579//thylakoid;GO:0009570//chloroplast stroma
284	CSE_Unigene13918	SW_Unigene12096	-	-	+(Mostly)	882	0.989	7	2	5	0.71451	0.485106	gi|225427258|ref|XP_002281131.1|	PREDICTED: ferredoxin-1 [Vitis vinifera] >gi|297742123|emb|CBI33910.3| unnamed protein product [Vitis vinifera]	gi|359474571|ref|XM_002281095.2|	PREDICTED: Vitis vinifera ferredoxin-1-like (LOC100242061), mRNA	sp|P14936|FER1_RAPSA	Ferredoxin, root R-B1 OS=Raphanus sativus PE=1 SV=1	COG0633	Ferredoxin	K02639	vvi:100242061	ferredoxin	GO:0022900//electron transport chain;GO:0010103//stomatal complex morphogenesis;GO:0006098//pentose-phosphate shunt;GO:0019288//isopentenyl diphosphate biosynthetic process, mevalonate-independent pathway;GO:0009688//abscisic acid biosynthetic process	GO:0051537//2 iron, 2 sulfur cluster binding;GO:0046872//metal ion binding;GO:0009055//electron carrier activity	GO:0009507//chloroplast
285	CSE_Unigene17335	SW_Unigene24031	-	-	+(Mostly)	1335	0.996	6	4	2	0.150615	0.0287811	gi|225426184|ref|XP_002279382.1|	PREDICTED: BTB/POZ domain-containing protein At1g63850 [Vitis vinifera]	gi|359474085|ref|XM_002279346.2|	PREDICTED: Vitis vinifera BTB/POZ domain-containing protein At1g63850-like (LOC100257094), mRNA	sp|Q9CAJ9|Y1385_ARATH	BTB/POZ domain-containing protein At1g63850 OS=Arabidopsis thaliana GN=At1g63850 PE=1 SV=1	-	-	-	-	-	-	-	GO:0005634//nucleus;GO:0009536//plastid
286	CSE_Unigene856	SW_Unigene8325	-	-	+(Mostly)	699	0.99	7	2	5	0.908096	0.887101	gi|225426150|ref|XP_002278406.1|	PREDICTED: 2-C-methyl-D-erythritol 2,4-cyclodiphosphate synthase, chloroplastic-like [Vitis vinifera]	gi|225426149|ref|XM_002278370.1|	PREDICTED: Vitis vinifera 2-C-methyl-D-erythritol 2,4-cyclodiphosphate synthase, chloroplastic-like (LOC100250076), mRNA	sp|Q9M4W3|ISPF_CATRO	2-C-methyl-D-erythritol 2,4-cyclodiphosphate synthase, chloroplastic OS=Catharanthus roseus GN=ISPF PE=2 SV=1	COG0245	2C-methyl-D-erythritol 2,4-cyclodiphosphate synthase	K01770	vvi:100250076	2-C-methyl-D-erythritol 2,4-cyclodiphosphate synthase [EC:4.6.1.12]	GO:0016117//carotenoid biosynthetic process;GO:0015995//chlorophyll biosynthetic process	GO:0008685//2-C-methyl-D-erythritol 2,4-cyclodiphosphate synthase activity	GO:0009570//chloroplast stroma;GO:0005739//mitochondrion
287	CSE_Unigene8966	SW_Unigene6845	-	-	+(Mostly)	1125	0.996	4	3	1	0.0930419	0.03286	gi|225426344|ref|XP_002270160.1|	PREDICTED: putative E3 ubiquitin-protein ligase UBR7 [Vitis vinifera] >gi|297742333|emb|CBI34482.3| unnamed protein product [Vitis vinifera]	gi|123696915|emb|AM438564.1|	Vitis vinifera, whole genome shotgun sequence, contig VV78X254218.24, clone ENTAV 115	-	-	-	-	K11979	vvi:100242771	E3 ubiquitin-protein ligase UBR7 [EC:6.3.2.19]	GO:0006261//DNA-dependent DNA replication;GO:0016567//protein ubiquitination	GO:0004842//ubiquitin-protein ligase activity;GO:0008270//zinc ion binding	GO:0005737//cytoplasm
288	CSE_Unigene535	SW_Unigene22675	-	-	+(Mostly)	708	0.99	7	1.31206	5.68794	1.46365	0.870189	gi|147767601|emb|CAN73381.1|	hypothetical protein VITISV_003162 [Vitis vinifera]	gi|147767600|emb|AM426014.2|	Vitis vinifera contig VV78X138335.4, whole genome shotgun sequence	-	-	-	-	-	-	-	GO:0046777//protein autophosphorylation;GO:0009637//response to blue light;GO:0010155//regulation of proton transport;GO:0030003//cellular cation homeostasis;GO:0070838//divalent metal ion transport	-	GO:0009535//chloroplast thylakoid membrane
289	CSE_Unigene15952	SW_Unigene22769	-	-	+(Mostly)	3573	0.994	21	10.8191	10.1809	0.229356	0.000824892	gi|225426296|ref|XP_002265315.1|	PREDICTED: uncharacterized protein LOC100254675 [Vitis vinifera]	gi|225426295|ref|XM_002265279.1|	PREDICTED: Vitis vinifera uncharacterized LOC100254675 (LOC100254675), mRNA	sp|Q8L7I1|Y4193_ARATH	Uncharacterized protein At4g10930 OS=Arabidopsis thaliana GN=At4g10930 PE=2 SV=1	-	-	-	-	-	GO:0045491//xylan metabolic process	-	-
290	CSE_Unigene16872	SW_Unigene22269	-	-	+(Mostly)	627	0.981	12	9	3	0.144589	0.000242608	gi|225426226|ref|XP_002263179.1|	PREDICTED: ABC transporter F family member 3 [Vitis vinifera] >gi|297742399|emb|CBI34548.3| unnamed protein product [Vitis vinifera]	gi|359474125|ref|XM_002263143.2|	PREDICTED: Vitis vinifera ABC transporter F family member 3-like (LOC100256523), mRNA	sp|Q8H0V6|AB3F_ARATH	ABC transporter F family member 3 OS=Arabidopsis thaliana GN=ABCF3 PE=2 SV=1	COG0488	ATPase components of ABC transporters with duplicated ATPase domains	K06158	vvi:100256523	ATP-binding cassette, subfamily F, member 3	GO:0007010//cytoskeleton organization;GO:0006094//gluconeogenesis;GO:0006406//mRNA export from nucleus;GO:0009651//response to salt stress;GO:0010498//proteasomal protein catabolic process;GO:0042742//defense response to bacterium;GO:0006096//glycolysis;GO:0046686//response to cadmium ion;GO:0006200//ATP catabolic process;GO:0006606//protein import into nucleus	GO:0005215//transporter activity;GO:0016887//ATPase activity;GO:0005524//ATP binding	GO:0005829//cytosol
291	CSE_Unigene18008	SW_Unigene10281	-	-	+(Mostly)	1410	0.999	2	1	1	0.380218	0.399637	gi|225426842|ref|XP_002276721.1|	PREDICTED: phosphatidylinositol glycan anchor biosynthesis class U protein [Vitis vinifera] >gi|297742569|emb|CBI34718.3| unnamed protein product [Vitis vinifera]	gi|359474232|ref|XM_002276685.2|	PREDICTED: Vitis vinifera phosphatidylinositol glycan anchor biosynthesis class U protein-like (LOC100261568), mRNA	-	-	-	-	K05293	vvi:100261568	phosphatidylinositol glycan, class U	GO:0006506//GPI anchor biosynthetic process;GO:0042732//D-xylose metabolic process;GO:0051301//cell division	-	GO:0005739//mitochondrion;GO:0016021//integral to membrane;GO:0005789//endoplasmic reticulum membrane;GO:0005886//plasma membrane
292	CSE_Unigene13543	SW_Unigene14377	-	-	+(Mostly)	873	0.983	12	6	6	0.354387	0.0686955	gi|225470285|ref|XP_002266380.1|	PREDICTED: ATP-dependent Clp protease proteolytic subunit-related protein 2, chloroplastic [Vitis vinifera] >gi|147794105|emb|CAN62361.1| hypothetical protein VITISV_031921 [Vitis vinifera] >gi|297742668|emb|CBI34817.3| unnamed protein product [Vitis vinifera]	gi|359474288|ref|XM_002266344.2|	PREDICTED: Vitis vinifera ATP-dependent Clp protease proteolytic subunit-related protein 2, chloroplastic-like (LOC100256891), mRNA	sp|Q9XJ36|CLPR2_ARATH	ATP-dependent Clp protease proteolytic subunit-related protein 2, chloroplastic OS=Arabidopsis thaliana GN=CLPR2 PE=1 SV=1	COG0740	Protease subunit of ATP-dependent Clp proteases	K01358	vvi:100256891	ATP-dependent Clp protease, protease subunit [EC:3.4.21.92]	GO:0035304//regulation of protein dephosphorylation;GO:0010207//photosystem II assembly;GO:0009902//chloroplast relocation;GO:0006508//proteolysis;GO:0045893//positive regulation of transcription, DNA-dependent;GO:0042793//transcription from plastid promoter;GO:0006364//rRNA processing;GO:0010027//thylakoid membrane organization	GO:0004252//serine-type endopeptidase activity	GO:0009941//chloroplast envelope;GO:0009840//chloroplastic endopeptidase Clp complex;GO:0009534//chloroplast thylakoid;GO:0010287//plastoglobule
293	CSE_Unigene1843	SW_Unigene16799	-	-	+(Mostly)	2394	0.991	22	16	6	0.142221	1.47113e-05	gi|225427387|ref|XP_002262674.1|	PREDICTED: protein ACCUMULATION AND REPLICATION OF CHLOROPLASTS 6, chloroplastic [Vitis vinifera] >gi|296088380|emb|CBI37371.3| unnamed protein product [Vitis vinifera]	gi|225427386|ref|XM_002262638.1|	PREDICTED: Vitis vinifera protein ACCUMULATION AND REPLICATION OF CHLOROPLASTS 6, chloroplastic-like (LOC100251728), mRNA	sp|Q9FIG9|ARC6_ARATH	Protein ACCUMULATION AND REPLICATION OF CHLOROPLASTS 6, chloroplastic OS=Arabidopsis thaliana GN=ARC6 PE=1 SV=1	-	-	-	-	-	GO:0006457//protein folding;GO:0010020//chloroplast fission;GO:0010207//photosystem II assembly	GO:0043621//protein self-association	GO:0031357//integral to chloroplast inner membrane
294	CSE_Unigene16694	SW_Unigene18158	-	-	+(Mostly)	942	0.988	11	7	4	0.216197	0.0134859	gi|225427488|ref|XP_002263208.1|	PREDICTED: TIM21-like protein, mitochondrial [Vitis vinifera] >gi|296088479|emb|CBI37470.3| unnamed protein product [Vitis vinifera]	gi|225427487|ref|XM_002263172.1|	PREDICTED: Vitis vinifera TIM21-like protein, mitochondrial (LOC100259727), mRNA	sp|Q1G3L1|TIM21_ARATH	Probable mitochondrial import inner membrane translocase subunit TIM21 OS=Arabidopsis thaliana GN=TIM21 PE=1 SV=1	-	-	-	-	-	GO:0030150//protein import into mitochondrial matrix;GO:0090351//seedling development	-	GO:0005744//mitochondrial inner membrane presequence translocase complex;GO:0016023//cytoplasmic membrane-bounded vesicle
295	CSE_Unigene11060	SW_Unigene1865	-	-	+(Mostly)	1167	0.997	4	3	1	0.102655	0.0403161	gi|296085488|emb|CBI29220.3|	unnamed protein product [Vitis vinifera]	gi|359474765|ref|XM_002270815.2|	PREDICTED: Vitis vinifera carbon catabolite repressor protein 4 homolog 4-like (LOC100256249), mRNA	sp|A8MS41|CCR4D_ARATH	Carbon catabolite repressor protein 4 homolog 4 OS=Arabidopsis thaliana GN=CCR4-4 PE=2 SV=1	COG5239	mRNA deadenylase, exonuclease subunit and related nucleases	K12603	smo:SELMODRAFT_418021	CCR4-NOT transcription complex subunit 6	-	GO:0004535//poly(A)-specific ribonuclease activity	GO:0005739//mitochondrion;GO:0005634//nucleus;GO:0009507//chloroplast
296	CSE_Unigene4335	SW_Unigene24581	-	-	+(Mostly)	1137	0.992	9	6	3	0.167283	0.0103857	gi|296085497|emb|CBI29229.3|	unnamed protein product [Vitis vinifera]	gi|147772212|emb|AM426975.2|	Vitis vinifera contig VV78X256440.3, whole genome shotgun sequence	-	-	-	-	-	-	-	-	-	GO:0005739//mitochondrion
297	CSE_Unigene7170	SW_Unigene6891	-	-	+(Mostly)	1602	0.996	6	4	2	0.194984	0.0560993	gi|225427562|ref|XP_002266662.1|	PREDICTED: uncharacterized protein LOC100242504 [Vitis vinifera] >gi|296085502|emb|CBI29234.3| unnamed protein product [Vitis vinifera]	gi|225427561|ref|XM_002266626.1|	PREDICTED: Vitis vinifera uncharacterized LOC100242504 (LOC100242504), mRNA	-	-	COG0687	Spermidine/putrescine-binding periplasmic protein	-	-	-	GO:0015846//polyamine transport	GO:0046872//metal ion binding;GO:0019808//polyamine binding	GO:0009941//chloroplast envelope;GO:0005634//nucleus;GO:0042597//periplasmic space
298	CSE_Unigene15268	SW_Unigene18515	-	-	+(Mostly)	1713	0.992	14	7	7	0.432936	0.135685	gi|296090451|emb|CBI40270.3|	unnamed protein product [Vitis vinifera]	gi|359475432|ref|XM_002285312.2|	PREDICTED: Vitis vinifera uncharacterized LOC100265867 (LOC100265867), mRNA	-	-	COG1055	Na+/H+ antiporter NhaD and related arsenite permeases	-	-	-	GO:0035725//sodium ion transmembrane transport;GO:0006848//pyruvate transport;GO:0015746//citrate transport	GO:0015385//sodium:hydrogen antiporter activity;GO:0050833//pyruvate transmembrane transporter activity;GO:0015137//citrate transmembrane transporter activity;GO:0015386//potassium:hydrogen antiporter activity	GO:0016021//integral to membrane;GO:0009507//chloroplast
299	CSE_Unigene659	SW_Unigene17176	-	-	+(Mostly)	639	0.98	13	6	7	0.407028	0.094581	gi|296087485|emb|CBI34074.3|	unnamed protein product [Vitis vinifera]	gi|225462859|ref|XM_002270135.1|	PREDICTED: Vitis vinifera 1,4-dihydroxy-2-naphthoate polyprenyltransferase, chloroplastic-like (LOC100256517), mRNA	sp|Q0WUA3|MENA_ARATH	1,4-dihydroxy-2-naphthoate polyprenyltransferase, chloroplastic OS=Arabidopsis thaliana GN=ABC4 PE=1 SV=2	COG1575	1,4-dihydroxy-2-naphthoate octaprenyltransferase	K02548	vvi:100256517	1,4-dihydroxy-2-naphthoate octaprenyltransferase [EC:2.5.1.74 2.5.1.-]	GO:0016556//mRNA modification;GO:0010103//stomatal complex morphogenesis;GO:0019288//isopentenyl diphosphate biosynthetic process, mevalonate-independent pathway;GO:0009772//photosynthetic electron transport in photosystem II;GO:0010236//plastoquinone biosynthetic process;GO:0010207//photosystem II assembly;GO:0042372//phylloquinone biosynthetic process	GO:0046428//1,4-dihydroxy-2-naphthoate octaprenyltransferase activity	GO:0016021//integral to membrane;GO:0009507//chloroplast;GO:0005886//plasma membrane
300	CSE_CL6870_Contig2	SW_Unigene20328	-	-	+(Mostly)	1158	0.99	12	11	1	0.0339379	5.73651e-06	gi|225428049|ref|XP_002279281.1|	PREDICTED: glycerate dehydrogenase [Vitis vinifera] >gi|297744600|emb|CBI37862.3| unnamed protein product [Vitis vinifera]	gi|359475020|ref|XM_002279245.2|	PREDICTED: Vitis vinifera glycerate dehydrogenase-like (LOC100262344), mRNA	sp|Q9C9W5|HPR1_ARATH	Glycerate dehydrogenase HPR, peroxisomal OS=Arabidopsis thaliana GN=HPR PE=1 SV=1	COG1052	Lactate dehydrogenase and related dehydrogenases	K15893	vvi:100262344	hydroxypyruvate reductase 1	GO:0010218//response to far red light;GO:0035304//regulation of protein dephosphorylation;GO:0010114//response to red light;GO:0010207//photosystem II assembly;GO:0042631//cellular response to water deprivation;GO:0009854//oxidative photosynthetic carbon pathway;GO:0009773//photosynthetic electron transport in photosystem I;GO:0071482//cellular response to light stimulus;GO:0010304//PSII associat…	GO:0051287//NAD binding;GO:0008465//glycerate dehydrogenase activity;GO:0008266//poly(U) RNA binding	GO:0048046//apoplast;GO:0009507//chloroplast;GO:0005777//peroxisome
301	CSE_Unigene17133	SW_Unigene4730	-	-	+(Mostly)	927	0.99	9	5	4	0.2702	0.0516198	gi|225427786|ref|XP_002269232.1|	PREDICTED: NADP-dependent D-sorbitol-6-phosphate dehydrogenase [Vitis vinifera] >gi|297744718|emb|CBI37980.3| unnamed protein product [Vitis vinifera]	gi|359475080|ref|XM_002269196.2|	PREDICTED: Vitis vinifera NADP-dependent D-sorbitol-6-phosphate dehydrogenase-like (LOC100243586), mRNA	sp|P28475|S6PD_MALDO	NADP-dependent D-sorbitol-6-phosphate dehydrogenase OS=Malus domestica GN=S6PDH PE=2 SV=1	COG0656	Aldo/keto reductases, related to diketogulonate reductase	K00085	ath:AT2G21260	aldose-6-phosphate reductase (NADPH2) [EC:1.1.1.200]	GO:0046686//response to cadmium ion;GO:0055114//oxidation-reduction process	GO:0047641	GO:0005829//cytosol
302	CSE_Unigene19706	SW_Unigene12747	-	-	+(Mostly)	867	0.99	9	4	5	0.581915	0.445274	gi|297741277|emb|CBI32408.3|	unnamed protein product [Vitis vinifera]	gi|147814942|emb|AM463790.2|	Vitis vinifera contig VV78X094448.8, whole genome shotgun sequence	sp|Q9LJK3|LAG12_ARATH	LAG1 longevity assurance homolog 2 OS=Arabidopsis thaliana GN=LAG2 PE=1 SV=1	COG5058	Protein transporter of the TRAM (translocating chain-associating membrane) superfamily, longevity assurance factor	K04710	pop:POPTR_767571	ceramide synthetase [EC:2.3.1.24]	GO:0046520//sphingoid biosynthetic process;GO:0042759//long-chain fatty acid biosynthetic process;GO:0002238//response to molecule of fungal origin;GO:0016126//sterol biosynthetic process	GO:0050291//sphingosine N-acyltransferase activity	GO:0016021//integral to membrane;GO:0005783//endoplasmic reticulum;GO:0005794//Golgi apparatus;GO:0005886//plasma membrane
303	CSE_Unigene17328	SW_CL7605_Contig1	-	-	+(Mostly)	1194	0.991	11	5	6	0.382351	0.103409	gi|225428691|ref|XP_002284953.1|	PREDICTED: probable N-acetyl-gamma-glutamyl-phosphate reductase, chloroplastic [Vitis vinifera] >gi|297741338|emb|CBI32469.3| unnamed protein product [Vitis vinifera]	gi|359475224|ref|XM_002284917.2|	PREDICTED: Vitis vinifera probable N-acetyl-gamma-glutamyl-phosphate reductase, chloroplastic-like (LOC100255475), mRNA	sp|Q93Z70|ARGC_ARATH	Probable N-acetyl-gamma-glutamyl-phosphate reductase, chloroplastic OS=Arabidopsis thaliana GN=At2g19940 PE=1 SV=2	COG0002	Acetylglutamate semialdehyde dehydrogenase	K00145	vvi:100255475	N-acetyl-gamma-glutamyl-phosphate reductase [EC:1.2.1.38]	GO:0055114//oxidation-reduction process;GO:0006526//arginine biosynthetic process;GO:0048481//ovule development;GO:0046686//response to cadmium ion	GO:0051287//NAD binding;GO:0005507//copper ion binding;GO:0003942//N-acetyl-gamma-glutamyl-phosphate reductase activity;GO:0046983//protein dimerization activity	GO:0005730//nucleolus;GO:0009570//chloroplast stroma;GO:0016020//membrane
304	CSE_CL1517_Contig1	SW_CL2896_Contig2	-	-	+(Mostly)	846	0.988	10	6	4	0.183942	0.0100666	gi|147820884|emb|CAN60895.1|	hypothetical protein VITISV_023239 [Vitis vinifera]	gi|349718067|emb|FQ387266.1|	Vitis vinifera clone SS0AEB27YC11	-	-	-	-	K11876	vvi:100243552	proteasome assembly chaperone 2	GO:0006635//fatty acid beta-oxidation	-	GO:0000502//proteasome complex;GO:0005634//nucleus;GO:0009536//plastid
305	CSE_CL6934_Contig1	SW_CL2818_Contig1	-	-	+(Mostly)	957	0.984	15	12	3	0.0772071	7.40034e-06	gi|146432259|gb|ABQ41113.1|	L-galactose dehydrogenase [Vitis vinifera]	gi|349722906|emb|FQ393241.1|	Vitis vinifera clone SS0AFA2YA07	sp|O81884|GALDH_ARATH	L-galactose dehydrogenase OS=Arabidopsis thaliana GN=LGALDH PE=1 SV=1	COG0667	Predicted oxidoreductases (related to aryl-alcohol dehydrogenases)	K00064	vvi:100263479	D-threo-aldose 1-dehydrogenase [EC:1.1.1.122]	GO:0019853//L-ascorbic acid biosynthetic process;GO:0055114//oxidation-reduction process	GO:0010349//L-galactose dehydrogenase activity;GO:0050235//pyridoxal 4-dehydrogenase activity	-
306	CSE_Unigene17387	SW_Unigene18526	-	-	+(Mostly)	1623	0.979	23	9	14	0.645158	0.355701	gi|225429193|ref|XP_002276156.1|	PREDICTED: F-box protein SKIP22 [Vitis vinifera] >gi|147804806|emb|CAN73524.1| hypothetical protein VITISV_010705 [Vitis vinifera]	gi|225429192|ref|XM_002276120.1|	PREDICTED: Vitis vinifera F-box protein SKIP22-like (LOC100246319), mRNA	sp|Q9ZUB8|SKI22_ARATH	F-box protein SKIP22 OS=Arabidopsis thaliana GN=SKIP22 PE=1 SV=1	-	-	K10293	vvi:100246319	F-box protein 7	-	-	-
307	CSE_Unigene13039	SW_Unigene22743	-	-	+(Mostly)	639	0.992	5	4	1	0.0879585	0.0172999	gi|225429325|ref|XP_002271696.1|	PREDICTED: thioredoxin domain-containing protein 9 homolog [Vitis vinifera] >gi|296083094|emb|CBI22498.3| unnamed protein product [Vitis vinifera]	gi|225429324|ref|XM_002271660.1|	PREDICTED: Vitis vinifera thioredoxin domain-containing protein 9 homolog-like (LOC100262780), mRNA	sp|O64628|TXND9_ARATH	Thioredoxin domain-containing protein 9 homolog OS=Arabidopsis thaliana GN=At2g18990 PE=2 SV=1	COG0526	Thiol-disulfide isomerase and thioredoxins	K03671	mtr:MTR_7g009070	thioredoxin 1	GO:0045454//cell redox homeostasis;GO:0019932//second-messenger-mediated signaling	-	GO:0005737//cytoplasm
308	CSE_Unigene11973	SW_Unigene21915	-	-	+(Mostly)	858	0.994	5	4	1	0.0782045	0.012478	gi|359475460|ref|XP_002270710.2|	PREDICTED: TIP41-like protein-like [Vitis vinifera] >gi|296083102|emb|CBI22506.3| unnamed protein product [Vitis vinifera]	gi|359475459|ref|XM_002270674.2|	PREDICTED: Vitis vinifera TIP41-like protein-like (LOC100255906), mRNA	-	-	-	-	-	-	-	-	-	GO:0005829//cytosol
309	CSE_Unigene10042	SW_CL5446_Contig1	-	-	+(Mostly)	1290	0.997	4	3	1	0.114899	0.0504926	gi|225429226|ref|XP_002263383.1|	PREDICTED: uncharacterized protein LOC100256074 [Vitis vinifera] >gi|296088080|emb|CBI35439.3| unnamed protein product [Vitis vinifera]	gi|359475581|ref|XM_002263347.2|	PREDICTED: Vitis vinifera uncharacterized LOC100256074 (LOC100256074), mRNA	-	-	COG0598	Mg2+ and Co2+ transporters	-	-	-	GO:0055085//transmembrane transport;GO:0031348//negative regulation of defense response;GO:0045087//innate immune response;GO:0006944//cellular membrane fusion;GO:0030968//endoplasmic reticulum unfolded protein response;GO:0009863//salicylic acid mediated signaling pathway;GO:0030001//metal ion transport;GO:0009697//salicylic acid biosynthetic process	GO:0046873//metal ion transmembrane transporter activity	GO:0005622//intracellular;GO:0005886//plasma membrane
310	CSE_Unigene16565	SW_CL5155_Contig2	-	-	+(Mostly)	2391	0.992	19	12	7	0.222914	0.00136029	gi|359476904|ref|XP_002263406.2|	PREDICTED: protein GRIP [Vitis vinifera]	gi|359476903|ref|XM_002263370.2|	PREDICTED: Vitis vinifera protein GRIP-like (LOC100266353), mRNA	sp|Q8S2T0|GRIP_ARATH	Protein GRIP OS=Arabidopsis thaliana GN=GRIP PE=1 SV=2	COG0419	ATPase involved in DNA repair	K09291	smo:SELMODRAFT_444132	nucleoprotein TPR	GO:0000278//mitotic cell cycle;GO:0006396//RNA processing;GO:0000042//protein targeting to Golgi;GO:0030244//cellulose biosynthetic process;GO:0009630//gravitropism	GO:0005515//protein binding	GO:0005802//trans-Golgi network;GO:0005794//Golgi apparatus
311	CSE_Unigene18070	SW_Unigene6698	-	-	+(Mostly)	1362	0.994	8	4	4	0.33899	0.11905	gi|225431071|ref|XP_002263236.1|	PREDICTED: 3-dehydroquinate synthase [Vitis vinifera] >gi|297734973|emb|CBI17335.3| unnamed protein product [Vitis vinifera]	gi|225431070|ref|XM_002263200.1|	PREDICTED: Vitis vinifera 3-dehydroquinate synthase-like (LOC100266137), mRNA	-	-	COG0337	3-dehydroquinate synthetase	K01735	vvi:100266137	3-dehydroquinate synthase [EC:4.2.3.4]	GO:0009073//aromatic amino acid family biosynthetic process	GO:0003856//3-dehydroquinate synthase activity	GO:0009507//chloroplast
312	CSE_Unigene19243	SW_Unigene22752	-	-	+(Mostly)	1878	0.993	13	6	7	0.436699	0.191303	gi|225431257|ref|XP_002274814.1|	PREDICTED: CDK5RAP1-like protein-like [Vitis vinifera]	gi|225431256|ref|XM_002274778.1|	PREDICTED: Vitis vinifera CDK5RAP1-like protein-like (LOC100266017), mRNA	sp|Q8H0V1|CK5P1_ARATH	CDK5RAP1-like protein OS=Arabidopsis thaliana GN=At4g36390 PE=2 SV=1	COG0621	2-methylthioadenine synthetase	K14441	cme:CMQ410C	ribosomal protein S12 methylthiotransferase [EC:2.-.-.-]	GO:0010155//regulation of proton transport;GO:0006655//phosphatidylglycerol biosynthetic process;GO:0007131//reciprocal meiotic recombination;GO:0009793//embryo development ending in seed dormancy;GO:0006400//tRNA modification;GO:0009691//cytokinin biosynthetic process;GO:0016226//iron-sulfur cluster assembly;GO:0046777//protein autophosphorylation;GO:0055114//oxidation-reduction process;GO:00090…	GO:0051539//4 iron, 4 sulfur cluster binding;GO:0016740//transferase activity;GO:0032440//2-alkenal reductase [NAD(P)] activity;GO:0046872//metal ion binding	GO:0009507//chloroplast;GO:0005739//mitochondrion
313	CSE_Unigene13329	SW_Unigene15585	-	-	+(Mostly)	648	0.998	1	1	NA	0	NA	gi|359476682|ref|XP_002264695.2|	PREDICTED: soluble inorganic pyrophosphatase-like [Vitis vinifera] >gi|297735129|emb|CBI17491.3| unnamed protein product [Vitis vinifera]	gi|359476681|ref|XM_002264659.2|	PREDICTED: Vitis vinifera soluble inorganic pyrophosphatase-like (LOC100254798), mRNA	sp|Q0DYB1|IPYR_ORYSJ	Soluble inorganic pyrophosphatase OS=Oryza sativa subsp. japonica GN=IPP PE=2 SV=1	COG0221	Inorganic pyrophosphatase	K01507	vvi:100254798	inorganic pyrophosphatase [EC:3.6.1.1]	GO:0046686//response to cadmium ion;GO:0006796//phosphate-containing compound metabolic process	GO:0004427//inorganic diphosphatase activity;GO:0000287//magnesium ion binding	GO:0005737//cytoplasm;GO:0005634//nucleus
314	CSE_Unigene9646	SW_CL3893_Contig1	-	-	+(Mostly)	1251	0.995	6	1	5	1.82625	0.845484	gi|225430718|ref|XP_002266392.1|	PREDICTED: transmembrane protein 53-like [Vitis vinifera]	gi|225430717|ref|XM_002266356.1|	PREDICTED: Vitis vinifera transmembrane protein 53-like (LOC100256387), mRNA	-	-	-	-	-	-	-	-	-	GO:0043231//intracellular membrane-bounded organelle;GO:0044444//cytoplasmic part
315	CSE_CL4320_Contig1	SW_Unigene11003	-	-	+(Mostly)	555	0.995	3	3	NA	0	NA	gi|225430752|ref|XP_002267002.1|	PREDICTED: probable ADP-ribosylation factor At2g18390 [Vitis vinifera] >gi|147792210|emb|CAN72979.1| hypothetical protein VITISV_009030 [Vitis vinifera] >gi|297735152|emb|CBI17514.3| unnamed protein product [Vitis vinifera]	gi|225430751|ref|XM_002266966.1|	PREDICTED: Vitis vinifera probable ADP-ribosylation factor At2g18390-like (LOC100252991), mRNA	sp|Q9ZPX1|ARF5_ARATH	Probable ADP-ribosylation factor At2g18390 OS=Arabidopsis thaliana GN=At2g18390 PE=2 SV=1	COG1100	GTPase SAR1 and related small G proteins	K07943	vvi:100252991	ADP-ribosylation factor-like 2	GO:0007264//small GTPase mediated signal transduction;GO:0009960//endosperm development;GO:0000226//microtubule cytoskeleton organization;GO:0007021//tubulin complex assembly;GO:0009630//gravitropism;GO:0009558//embryo sac cellularization;GO:0006886//intracellular protein transport;GO:0009793//embryo development ending in seed dormancy	GO:0003924//GTPase activity;GO:0005525//GTP binding	GO:0005794//Golgi apparatus
316	CSE_Unigene14197	SW_Unigene19730	-	-	+(Mostly)	462	0.996	2	2	NA	0	NA	gi|225430768|ref|XP_002267591.1|	PREDICTED: MIP18 family protein At1g68310-like [Vitis vinifera]	gi|349708860|emb|FQ395720.1|	Vitis vinifera clone SS0AFA14YH01	sp|Q9C9G6|U195A_ARATH	MIP18 family protein At1g68310 OS=Arabidopsis thaliana GN=At1g68310 PE=2 SV=2	COG5133	Uncharacterized conserved protein	-	-	-	-	-	GO:0005634//nucleus
317	CSE_Unigene11734	SW_Unigene11645	-	-	+(Mostly)	1446	0.999	1	1	NA	0	NA	gi|225430778|ref|XP_002267187.1|	PREDICTED: cytochrome P450 90B1-like [Vitis vinifera]	gi|359476573|ref|XM_002267151.2|	PREDICTED: Vitis vinifera cytochrome P450 90B1-like (LOC100241065), mRNA	sp|O64989|C90B1_ARATH	Cytochrome P450 90B1 OS=Arabidopsis thaliana GN=CYP90B1 PE=1 SV=2	COG2124	Cytochrome P450	K09587	vvi:100241065	cytochrome P450, family 90, subfamily B, polypeptide 1 (steroid 22-alpha-hydroxylase) [EC:1.14.13.-]	GO:0016132//brassinosteroid biosynthetic process;GO:0055114//oxidation-reduction process;GO:0009867//jasmonic acid mediated signaling pathway;GO:0010358//leaf shaping;GO:0009741//response to brassinosteroid stimulus;GO:0009826//unidimensional cell growth;GO:0016126//sterol biosynthetic process	GO:0010012//steroid 22-alpha hydroxylase activity;GO:0009055//electron carrier activity;GO:0020037//heme binding;GO:0050597;GO:0005506//iron ion binding	GO:0005783//endoplasmic reticulum
318	CSE_Unigene14059	SW_Unigene16868	-	-	+(Mostly)	1296	0.992	10	6	4	0.217812	0.0188457	gi|359476598|ref|XP_002269879.2|	PREDICTED: phospholipase A(1) LCAT3-like [Vitis vinifera] >gi|297735233|emb|CBI17595.3| unnamed protein product [Vitis vinifera]	gi|359476597|ref|XM_002269843.2|	PREDICTED: Vitis vinifera phospholipase A(1) LCAT3-like (LOC100263328), mRNA	sp|Q93V61|LCAT3_ARATH	Phospholipase A(1) LCAT3 OS=Arabidopsis thaliana GN=LCAT3 PE=1 SV=1	-	-	K06129	bdi:100841379	lysophospholipase III [EC:3.1.1.5]	GO:0006629//lipid metabolic process	GO:0004607//phosphatidylcholine-sterol O-acyltransferase activity	GO:0005576//extracellular region
319	CSE_Unigene966	SW_Unigene19346	-	-	+(Mostly)	1347	0.984	10	8	2	0.0842053	0.000460866	gi|225430898|ref|XP_002276037.1|	PREDICTED: peptide chain release factor 2 [Vitis vinifera]	gi|359476742|ref|XM_002276001.2|	PREDICTED: Vitis vinifera peptide chain release factor 2-like (LOC100265078), mRNA	-	-	COG1186	Protein chain release factor B	K02836	vvi:100265078	peptide chain release factor 2	GO:0006415//translational termination;GO:0035304//regulation of protein dephosphorylation;GO:0010207//photosystem II assembly;GO:0009902//chloroplast relocation;GO:0009965//leaf morphogenesis;GO:0030154//cell differentiation;GO:0045893//positive regulation of transcription, DNA-dependent;GO:0042793//transcription from plastid promoter;GO:0006364//rRNA processing;GO:0010027//thylakoid membrane org…	GO:0016149//translation release factor activity, codon specific	GO:0009570//chloroplast stroma
320	CSE_Unigene18498	SW_Unigene14968	-	-	+(Mostly)	1293	0.995	7	3	4	0.574597	0.127355	gi|225431005|ref|XP_002279210.1|	PREDICTED: CBS domain-containing protein CBSX6 [Vitis vinifera] >gi|297735292|emb|CBI17654.3| unnamed protein product [Vitis vinifera]	gi|359476788|ref|XM_002279174.2|	PREDICTED: Vitis vinifera CBS domain-containing protein CBSX6-like (LOC100266840), mRNA	sp|Q8GZA4|CBSX6_ARATH	CBS domain-containing protein CBSX6 OS=Arabidopsis thaliana GN=CBSX6 PE=1 SV=1	-	-	-	-	-	-	-	GO:0005773//vacuole
321	CSE_Unigene18700	SW_Unigene17542	-	-	+(Mostly)	1914	0.996	8	4	4	0.355466	0.132269	gi|359476796|ref|XP_002279984.2|	PREDICTED: protein LUTEIN DEFICIENT 5, chloroplastic-like [Vitis vinifera] >gi|297735311|emb|CBI17673.3| unnamed protein product [Vitis vinifera]	gi|359476795|ref|XM_002279948.2|	PREDICTED: Vitis vinifera protein LUTEIN DEFICIENT 5, chloroplastic-like (LOC100240996), mRNA	sp|Q93VK5|LUT5_ARATH	Protein LUTEIN DEFICIENT 5, chloroplastic OS=Arabidopsis thaliana GN=CYP97A3 PE=1 SV=1	COG2124	Cytochrome P450	K15747	vvi:100240996	cytochrome P450, family 97, subfamily A (beta-ring hydroxylase) [EC:1.14.-.-]	GO:0006655//phosphatidylglycerol biosynthetic process;GO:0006636//unsaturated fatty acid biosynthetic process;GO:0043085//positive regulation of catalytic activity;GO:0019252//starch biosynthetic process;GO:0016123//xanthophyll biosynthetic process;GO:0019288//isopentenyl diphosphate biosynthetic process, mevalonate-independent pathway;GO:0000023//maltose metabolic process;GO:0015995//chlorophyll…	GO:0010291//carotene beta-ring hydroxylase activity;GO:0070330//aromatase activity;GO:0020037//heme binding;GO:0009055//electron carrier activity;GO:0019825//oxygen binding;GO:0005506//iron ion binding	GO:0009941//chloroplast envelope
322	CSE_Unigene1449	SW_Unigene18093	-	-	+(Mostly)	375	0.984	6	5	1	0.0806917	0.00898088	gi|225462409|ref|XP_002267152.1|	PREDICTED: violaxanthin de-epoxidase, chloroplastic [Vitis vinifera]	gi|225462408|ref|XM_002267116.1|	PREDICTED: Vitis vinifera violaxanthin de-epoxidase, chloroplastic-like (LOC100257865), mRNA	sp|Q40593|VDE_TOBAC	Violaxanthin de-epoxidase, chloroplastic OS=Nicotiana tabacum GN=VDE1 PE=2 SV=1	-	-	K09839	vvi:100257865	violaxanthin de-epoxidase [EC:1.10.99.3]	GO:0010028//xanthophyll cycle;GO:0006631//fatty acid metabolic process;GO:0015994//chlorophyll metabolic process;GO:0009408//response to heat;GO:0055114//oxidation-reduction process	GO:0046422//violaxanthin de-epoxidase activity	GO:0009543//chloroplast thylakoid lumen
323	CSE_Unigene16546	SW_CL4332_Contig2	-	-	+(Mostly)	990	0.989	11	6	5	0.27021	0.0323301	gi|225431539|ref|XP_002281894.1|	PREDICTED: uridylate kinase-like [Vitis vinifera]	gi|225431538|ref|XM_002281858.1|	PREDICTED: Vitis vinifera uridylate kinase-like (LOC100242145), mRNA	-	-	COG0528	Uridylate kinase	K09903	vvi:100242145	uridylate kinase [EC:2.7.4.22]	GO:0006399//tRNA metabolic process;GO:0045036//protein targeting to chloroplast;GO:0009793//embryo development ending in seed dormancy;GO:0016310//phosphorylation;GO:0016226//iron-sulfur cluster assembly;GO:0010228//vegetative to reproductive phase transition of meristem;GO:0009658//chloroplast organization;GO:0045893//positive regulation of transcription, DNA-dependent;GO:0009073//aromatic amino…	GO:0033862//UMP kinase activity	GO:0009507//chloroplast
324	CSE_CL4632_Contig3	SW_Unigene17211	-	-	+(Mostly)	573	0.986	8	3	5	0.603126	0.363296	gi|225431425|ref|XP_002273009.1|	PREDICTED: cancer-related nucleoside-triphosphatase homolog [Vitis vinifera] >gi|296088653|emb|CBI37644.3| unnamed protein product [Vitis vinifera]	gi|359476976|ref|XM_002272973.2|	PREDICTED: Vitis vinifera cancer-related nucleoside-triphosphatase homolog-like (LOC100255709), mRNA	-	-	COG1618	Predicted nucleotide kinase	K06928	vvi:100255709	nucleoside-triphosphatase THEP1 [EC:3.6.1.15]	-	GO:0019204//nucleotide phosphatase activity;GO:0005524//ATP binding;GO:0016740//transferase activity;GO:0017111//nucleoside-triphosphatase activity	GO:0005634//nucleus;GO:0005739//mitochondrion
325	CSE_Unigene16962	SW_Unigene15522	-	-	+(Mostly)	972	0.987	13	7	6	0.28732	0.0254022	gi|225464329|ref|XP_002271869.1|	PREDICTED: putative UDP-sugar transporter DDB_G0278631 [Vitis vinifera] >gi|296083783|emb|CBI24000.3| unnamed protein product [Vitis vinifera]	gi|349705821|emb|FQ384360.1|	Vitis vinifera clone SS0AAG1YN02	sp|Q84L09|GONS2_ARATH	GDP-mannose transporter GONST2 OS=Arabidopsis thaliana GN=GONST2 PE=2 SV=1	COG5070	Nucleotide-sugar transporter	K15281	vvi:100250381	solute carrier family 35	GO:0055085//transmembrane transport;GO:0015786//UDP-glucose transport;GO:0015785//UDP-galactose transport;GO:0080147//root hair cell development;GO:0048527//lateral root development;GO:0008643//carbohydrate transport	GO:0005460//UDP-glucose transmembrane transporter activity;GO:0005459//UDP-galactose transmembrane transporter activity	GO:0016021//integral to membrane;GO:0005794//Golgi apparatus;GO:0005886//plasma membrane
326	CSE_Unigene15371	SW_Unigene16600	-	-	+(Mostly)	1110	0.987	14	12	2	0.0774436	5.23311e-05	gi|225466171|ref|XP_002263956.1|	PREDICTED: uncharacterized transporter sll0355 [Vitis vinifera]	gi|225466170|ref|XM_002263920.1|	PREDICTED: Vitis vinifera uncharacterized LOC100256401 (LOC100256401), mRNA	sp|Q93V85|WTR16_ARATH	WAT1-related protein At3g02690, chloroplastic OS=Arabidopsis thaliana GN=At3g02690 PE=1 SV=1	COG0697	Permeases of the drug/metabolite transporter (DMT) superfamily	K15269	rcu:RCOM_0303930	probable blue pigment (indigoidine) exporter	-	-	GO:0009507//chloroplast;GO:0016020//membrane
327	CSE_Unigene13199	SW_Unigene1742	-	-	+(Mostly)	1788	0.993	12	5	7	0.368454	0.0854482	gi|359476463|ref|XP_003631844.1|	PREDICTED: uncharacterized protein LOC100853048 [Vitis vinifera] >gi|296083807|emb|CBI24024.3| unnamed protein product [Vitis vinifera]	gi|359476462|ref|XM_003631796.1|	PREDICTED: Vitis vinifera uncharacterized LOC100853048 (LOC100853048), mRNA	-	-	-	-	K10867	rcu:RCOM_0538810	nijmegen breakage syndrome protein 1	GO:0007131//reciprocal meiotic recombination;GO:0048438//floral whorl development;GO:0032504//multicellular organism reproduction;GO:0033044//regulation of chromosome organization;GO:0006355//regulation of transcription, DNA-dependent;GO:0048449//floral organ formation;GO:0006302//double-strand break repair;GO:0007059//chromosome segregation;GO:0048522//positive regulation of cellular process;GO:…	-	-
328	CSE_Unigene9297	SW_Unigene15704	-	-	+(Mostly)	1044	0.994	6	5	1	0.0733576	0.00620693	gi|225429492|ref|XP_002278242.1|	PREDICTED: uncharacterized protein LOC100243991 [Vitis vinifera] >gi|296081636|emb|CBI20641.3| unnamed protein product [Vitis vinifera]	gi|225429491|ref|XM_002278206.1|	PREDICTED: Vitis vinifera uncharacterized LOC100243991 (LOC100243991), mRNA	-	-	-	-	-	-	-	GO:0015693//magnesium ion transport	GO:0015095//magnesium ion transmembrane transporter activity	GO:0009507//chloroplast;GO:0016020//membrane
329	CSE_Unigene9581	SW_Unigene10526	-	-	+(Mostly)	645	0.992	5	4	1	0.082125	0.0143614	gi|225429494|ref|XP_002278305.1|	PREDICTED: cytokinin riboside 5&apos;-monophosphate phosphoribohydrolase LOG8 [Vitis vinifera] >gi|147857102|emb|CAN81797.1| hypothetical protein VITISV_043338 [Vitis vinifera] >gi|296081637|emb|CBI20642.3| unnamed protein product [Vitis vinifera]	gi|225429493|ref|XM_002278269.1|	PREDICTED: Vitis vinifera cytokinin riboside 5'-monophosphate phosphoribohydrolase LOG8-like (LOC100266322), mRNA	sp|Q84MC2|LOG8_ARATH	Cytokinin riboside 5'-monophosphate phosphoribohydrolase LOG8 OS=Arabidopsis thaliana GN=LOG8 PE=1 SV=1	COG1611	Predicted Rossmann fold nucleotide-binding protein	K06966	gmx:100306704		GO:0009691//cytokinin biosynthetic process	GO:0016799//hydrolase activity, hydrolyzing N-glycosyl compounds;GO:0016829//lyase activity;GO:0042803//protein homodimerization activity	GO:0005634//nucleus;GO:0005829//cytosol
330	CSE_Unigene24882	SW_Unigene1121	-	-	+(Mostly)	519	0.987	7	4	3	0.243674	0.0674616	gi|225429514|ref|XP_002279110.1|	PREDICTED: probable ADP,ATP carrier protein At5g56450 [Vitis vinifera] >gi|296081646|emb|CBI20651.3| unnamed protein product [Vitis vinifera]	gi|359475940|ref|XM_002279074.2|	PREDICTED: Vitis vinifera probable ADP,ATP carrier protein At5g56450-like (LOC100266251), mRNA	sp|Q9FM86|ADT5_ARATH	Probable ADP,ATP carrier protein At5g56450 OS=Arabidopsis thaliana GN=At5g56450 PE=2 SV=1	-	-	K05863	vvi:100266251	solute carrier family 25 (mitochondrial adenine nucleotide translocator), member 4/5/6/31	GO:0055085//transmembrane transport;GO:0006839//mitochondrial transport;GO:0048653//anther development	GO:0005347//ATP transmembrane transporter activity	GO:0016021//integral to membrane;GO:0005743//mitochondrial inner membrane
331	CSE_Unigene14713	SW_Unigene21965	-	-	+(Mostly)	951	0.996	4	3	1	0.10745	0.0442146	gi|225429746|ref|XP_002282370.1|	PREDICTED: E3 ubiquitin-protein ligase AIP2 isoform 1 [Vitis vinifera]	gi|225429745|ref|XM_002282334.1|	PREDICTED: Vitis vinifera E3 ubiquitin-protein ligase AIP2-like, transcript variant 1 (LOC100247386), mRNA	sp|Q8RXD3|AIP2_ARATH	E3 ubiquitin-protein ligase AIP2 OS=Arabidopsis thaliana GN=AIP2 PE=1 SV=1	COG5540	RING-finger-containing ubiquitin ligase	K11982	mtr:MTR_6g079660	E3 ubiquitin-protein ligase RNF115/126 [EC:6.3.2.19]	GO:0009788//negative regulation of abscisic acid mediated signaling pathway;GO:0016567//protein ubiquitination;GO:0006865//amino acid transport	GO:0008270//zinc ion binding;GO:0004842//ubiquitin-protein ligase activity;GO:0005515//protein binding	GO:0005829//cytosol;GO:0005634//nucleus
332	CSE_Unigene12646	SW_Unigene7979	-	-	+(Mostly)	564	0.982	10	4	6	0.547626	0.428632	gi|225429752|ref|XP_002280461.1|	PREDICTED: putative peptidyl-tRNA hydrolase PTRHD1 [Vitis vinifera] >gi|296081751|emb|CBI20756.3| unnamed protein product [Vitis vinifera]	gi|147845890|emb|AM427012.2|	Vitis vinifera contig VV78X232521.4, whole genome shotgun sequence	-	-	-	-	-	-	-	GO:0035335//peptidyl-tyrosine dephosphorylation	GO:0004045//aminoacyl-tRNA hydrolase activity;GO:0004725//protein tyrosine phosphatase activity	-
333	CSE_Unigene17077	SW_Unigene14029	-	-	+(Mostly)	1986	0.994	12	7	5	0.258286	0.0204008	gi|359475997|ref|XP_002280681.2|	PREDICTED: uncharacterized aarF domain-containing protein kinase At4g31390, chloroplastic-like [Vitis vinifera] >gi|296081769|emb|CBI20774.3| unnamed protein product [Vitis vinifera]	gi|359475996|ref|XM_002280645.2|	PREDICTED: Vitis vinifera uncharacterized LOC100244035 (LOC100244035), mRNA	sp|Q8RWG1|Y4139_ARATH	Uncharacterized aarF domain-containing protein kinase At4g31390, chloroplastic OS=Arabidopsis thaliana GN=At4g31390 PE=1 SV=1	COG0661	Predicted unusual protein kinase	K08869	osa:4350081	aarF domain-containing kinase	GO:0006468//protein phosphorylation;GO:0080183//response to photooxidative stress;GO:0015996//chlorophyll catabolic process	GO:0004672//protein kinase activity;GO:0005524//ATP binding	GO:0010287//plastoglobule;GO:0005886//plasma membrane
334	CSE_Unigene11019	SW_Unigene12890	-	-	+(Mostly)	1185	0.99	12	2	10	1.04652	0.898801	gi|225429894|ref|XP_002283626.1|	PREDICTED: ribosomal RNA small subunit methyltransferase H-like [Vitis vinifera]	gi|225429893|ref|XM_002283590.1|	PREDICTED: Vitis vinifera ribosomal RNA small subunit methyltransferase H-like (LOC100264531), mRNA	-	-	COG0275	Predicted S-adenosylmethionine-dependent methyltransferase involved in cell envelope biogenesis	K03438	ppp:PHYPADRAFT_43703	16S rRNA (cytosine1402-N4)-methyltransferase [EC:2.1.1.199]	GO:0032259//methylation	GO:0008168//methyltransferase activity	GO:0005739//mitochondrion
335	CSE_Unigene17747	SW_Unigene8145	-	-	+(Mostly)	831	0.994	5	3	2	0.186036	0.0730784	gi|147844011|emb|CAN79021.1|	hypothetical protein VITISV_009443 [Vitis vinifera]	gi|225429899|ref|XM_002281042.1|	PREDICTED: Vitis vinifera ribonuclease H2 subunit B-like (LOC100268103), mRNA	-	-	-	-	K10744	vvi:100268103	ribonuclease H2 subunit B	-	GO:0016787//hydrolase activity	GO:0005634//nucleus
336	CSE_CL1421_Contig1	SW_CL8545_Contig1	-	-	+(Mostly)	1203	0.993	8	7	1	0.0519715	0.000578169	gi|225429906|ref|XP_002283676.1|	PREDICTED: monoglyceride lipase [Vitis vinifera] >gi|147865769|emb|CAN83251.1| hypothetical protein VITISV_034794 [Vitis vinifera]	gi|225429905|ref|XM_002283640.1|	PREDICTED: Vitis vinifera monoglyceride lipase-like (LOC100254240), mRNA	-	-	COG2267	Lysophospholipase	-	-	-	GO:0010200//response to chitin	GO:0047372//acylglycerol lipase activity	-
337	CSE_Unigene12463	SW_Unigene15995	-	-	+(Mostly)	1158	0.988	14	7	7	0.332241	0.0386295	gi|225430001|ref|XP_002284106.1|	PREDICTED: branched-chain-amino-acid aminotransferase-like protein 3, chloroplastic [Vitis vinifera] >gi|296081877|emb|CBI20882.3| unnamed protein product [Vitis vinifera]	gi|225430000|ref|XM_002284070.1|	PREDICTED: Vitis vinifera branched-chain-amino-acid aminotransferase-like protein 3, chloroplastic (LOC100266456), mRNA	sp|Q8L493|BCAL3_ARATH	Branched-chain-amino-acid aminotransferase-like protein 3, chloroplastic OS=Arabidopsis thaliana GN=At5g57850 PE=2 SV=1	COG0115	Branched-chain amino acid aminotransferase/4-amino-4-deoxychorismate lyase	K00826	vvi:100266456	branched-chain amino acid aminotransferase [EC:2.6.1.42]	GO:0046654//tetrahydrofolate biosynthetic process;GO:0008153//para-aminobenzoic acid biosynthetic process	GO:0008696//4-amino-4-deoxychorismate lyase activity;GO:0047810//D-alanine:2-oxoglutarate aminotransferase activity	GO:0009570//chloroplast stroma
338	CSE_Unigene19165	SW_Unigene16984	-	-	+(Mostly)	2529	0.997	8	3	5	0.572189	0.335832	gi|225430033|ref|XP_002284239.1|	PREDICTED: beta-adaptin-like protein A [Vitis vinifera] >gi|296081892|emb|CBI20897.3| unnamed protein product [Vitis vinifera]	gi|225430032|ref|XM_002284203.1|	PREDICTED: Vitis vinifera beta-adaptin-like protein A (LOC100252486), mRNA	sp|Q9LDK9|APBLA_ARATH	Beta-adaptin-like protein A OS=Arabidopsis thaliana GN=BETAA-AD PE=1 SV=1	COG5096	Vesicle coat complex, various subunits	K12392	osa:4332864	AP-1 complex subunit beta-1	GO:0030244//cellulose biosynthetic process;GO:0048193//Golgi vesicle transport;GO:0006886//intracellular protein transport;GO:0006487//protein N-linked glycosylation	GO:0008565//protein transporter activity;GO:0043424//protein histidine kinase binding	GO:0030131//clathrin adaptor complex;GO:0005634//nucleus
339	CSE_Unigene17758	SW_Unigene16479	-	-	+(Mostly)	906	0.993	6	5	1	0.0691054	0.00507973	gi|225430037|ref|XP_002284246.1|	PREDICTED: GTP-binding protein At2g22870 [Vitis vinifera] >gi|296081893|emb|CBI20898.3| unnamed protein product [Vitis vinifera]	gi|359476378|ref|XM_002284210.2|	PREDICTED: Vitis vinifera GTP-binding protein At2g22870-like (LOC100257669), mRNA	sp|O81004|Y2287_ARATH	GTP-binding protein At2g22870 OS=Arabidopsis thaliana GN=EMB2001 PE=2 SV=2	COG0218	Predicted GTPase	K03978	pop:POPTR_867910	GTP-binding protein	GO:0006364//rRNA processing;GO:0009658//chloroplast organization;GO:0000917//barrier septum assembly;GO:0006399//tRNA metabolic process	GO:0005525//GTP binding	GO:0005739//mitochondrion;GO:0009507//chloroplast
340	CSE_Unigene12451	SW_Unigene23098	-	-	+(Mostly)	504	0.99	5	2	3	0.470314	0.345159	gi|225430075|ref|XP_002284484.1|	PREDICTED: group 2 truncated hemoglobin yjbI [Vitis vinifera] >gi|296081919|emb|CBI20924.3| unnamed protein product [Vitis vinifera]	gi|359476387|ref|XM_002284448.2|	PREDICTED: Vitis vinifera group 2 truncated hemoglobin yjbI-like (LOC100266294), mRNA	-	-	COG2346	Truncated hemoglobins	-	-	-	GO:0015671//oxygen transport;GO:0009733//response to auxin stimulus;GO:0001666//response to hypoxia	GO:0005344//oxygen transporter activity;GO:0005506//iron ion binding;GO:0020037//heme binding;GO:0019825//oxygen binding	GO:0005886//plasma membrane
341	CSE_Unigene8602	SW_Unigene23298	-	-	+(Mostly)	1002	0.986	8	2	6	1.05607	0.911256	gi|225430293|ref|XP_002282677.1|	PREDICTED: putative L-ascorbate peroxidase 6 [Vitis vinifera] >gi|296082040|emb|CBI21045.3| unnamed protein product [Vitis vinifera]	gi|359475819|ref|XM_002282641.2|	PREDICTED: Vitis vinifera L-ascorbate peroxidase-like (LOC100247405), mRNA	sp|Q1PER6|APX2_ARATH	L-ascorbate peroxidase 2, cytosolic OS=Arabidopsis thaliana GN=APX2 PE=2 SV=3	COG0376	Catalase (peroxidase I)	K00434	vvi:100247405	L-ascorbate peroxidase [EC:1.11.1.11]	GO:0055114//oxidation-reduction process;GO:0006979//response to oxidative stress	GO:0020037//heme binding;GO:0016688//L-ascorbate peroxidase activity	GO:0005576//extracellular region;GO:0005829//cytosol;GO:0009536//plastid
342	CSE_Unigene15318	SW_Unigene22191	-	-	+(Mostly)	1386	0.997	4	4	NA	0	NA	gi|225430398|ref|XP_002285385.1|	PREDICTED: aspartate aminotransferase, chloroplastic [Vitis vinifera] >gi|296082090|emb|CBI21095.3| unnamed protein product [Vitis vinifera]	gi|359475851|ref|XM_002285349.2|	PREDICTED: Vitis vinifera aspartate aminotransferase, chloroplastic-like (LOC100242364), mRNA	sp|P46248|AAT5_ARATH	Aspartate aminotransferase, chloroplastic OS=Arabidopsis thaliana GN=ASP5 PE=1 SV=2	COG1448	Aspartate/tyrosine/aromatic aminotransferase	K00811	vvi:100242364	aspartate aminotransferase, chloroplastic [EC:2.6.1.1]	GO:0009693//ethylene biosynthetic process;GO:0009409//response to cold;GO:0006520//cellular amino acid metabolic process;GO:0046686//response to cadmium ion	GO:0004069//L-aspartate:2-oxoglutarate aminotransferase activity;GO:0080130//L-phenylalanine:2-oxoglutarate aminotransferase activity;GO:0033853//aspartate-prephenate aminotransferase activity;GO:0033854//glutamate-prephenate aminotransferase activity;GO:0030170//pyridoxal phosphate binding	GO:0005829//cytosol;GO:0009941//chloroplast envelope;GO:0009570//chloroplast stroma;GO:0010319//stromule;GO:0048046//apoplast
343	CSE_CL4624_Contig1	SW_Unigene567	-	-	+(Mostly)	1908	0.992	15	7	8	0.370516	0.0517153	gi|296082097|emb|CBI21102.3|	unnamed protein product [Vitis vinifera]	gi|359475861|ref|XM_002282972.2|	PREDICTED: Vitis vinifera neurochondrin-like (LOC100260969), mRNA	-	-	-	-	-	-	-	GO:0007346//regulation of mitotic cell cycle	-	GO:0005737//cytoplasm
344	CSE_Unigene16835	SW_Unigene15871	-	-	+(Mostly)	639	0.986	9	7	2	0.069039	0.000284998	gi|225430510|ref|XP_002285564.1|	PREDICTED: phospholipid hydroperoxide glutathione peroxidase 1, chloroplastic [Vitis vinifera]	gi|359475891|ref|XM_002285528.2|	PREDICTED: Vitis vinifera phospholipid hydroperoxide glutathione peroxidase 1, chloroplastic-like (LOC100245697), mRNA	sp|P52032|GPX1_ARATH	Phospholipid hydroperoxide glutathione peroxidase 1, chloroplastic OS=Arabidopsis thaliana GN=GPX1 PE=1 SV=2	COG0386	Glutathione peroxidase	K00432	vvi:100245697	glutathione peroxidase [EC:1.11.1.9]	GO:0009407//toxin catabolic process;GO:0006979//response to oxidative stress;GO:0055114//oxidation-reduction process	GO:0004602//glutathione peroxidase activity	GO:0009941//chloroplast envelope;GO:0009570//chloroplast stroma;GO:0009535//chloroplast thylakoid membrane
345	CSE_CL1003_Contig1	SW_Unigene17588	-	-	+(Mostly)	1638	0.985	24	10	14	0.47806	0.0947526	gi|359475902|ref|XP_002283433.2|	PREDICTED: protein TIC 55, chloroplastic-like [Vitis vinifera] >gi|296082166|emb|CBI21171.3| unnamed protein product [Vitis vinifera]	gi|359475901|ref|XM_002283397.2|	PREDICTED: Vitis vinifera protein TIC 55, chloroplastic-like (LOC100259354), mRNA	sp|O49931|TIC55_PEA	Protein TIC 55, chloroplastic OS=Pisum sativum GN=TIC55 PE=1 SV=1	COG4638	Phenylpropionate dioxygenase and related ring-hydroxylating dioxygenases, large terminal subunit	K13071	ppp:PHYPADRAFT_134389	pheophorbide a oxygenase [EC:1.14.12.20]	GO:0045036//protein targeting to chloroplast;GO:0055114//oxidation-reduction process	GO:0046872//metal ion binding;GO:0010277//chlorophyllide a oxygenase [overall] activity;GO:0018489//vanillate monooxygenase activity;GO:0051537//2 iron, 2 sulfur cluster binding	GO:0009941//chloroplast envelope
346	CSE_Unigene16459	SW_Unigene17123	-	-	+(Mostly)	2439	0.99	23	16	7	0.170649	4.6439e-05	gi|296090500|emb|CBI40831.3|	unnamed protein product [Vitis vinifera]	gi|225462770|ref|XM_002263429.1|	PREDICTED: Vitis vinifera uncharacterized LOC100242787 (LOC100242787), mRNA	sp|Q9MA15|Y1796_ARATH	Uncharacterized aarF domain-containing protein kinase At1g79600, chloroplastic OS=Arabidopsis thaliana GN=At1g79600 PE=1 SV=1	COG0661	Predicted unusual protein kinase	K08869	vvi:100242787	aarF domain-containing kinase	GO:0006468//protein phosphorylation;GO:0009744//response to sucrose stimulus;GO:0010224//response to UV-B;GO:0009813//flavonoid biosynthetic process	GO:0004672//protein kinase activity;GO:0005524//ATP binding	GO:0009507//chloroplast;GO:0005886//plasma membrane
347	CSE_Unigene15733	SW_Unigene6121	-	-	+(Mostly)	762	0.99	5	2	3	0.49261	0.361818	gi|225433870|ref|XP_002265252.1|	PREDICTED: tetrapyrrole-binding protein, chloroplastic [Vitis vinifera] >gi|147779401|emb|CAN76796.1| hypothetical protein VITISV_030118 [Vitis vinifera]	gi|349724440|emb|FQ393390.1|	Vitis vinifera clone SS0AFA26YD18	sp|Q9LX31|GUN4C_ARATH	Tetrapyrrole-binding protein, chloroplastic OS=Arabidopsis thaliana GN=GUN4 PE=1 SV=1	COG0455	ATPases involved in chromosome partitioning	K01115	vcn:VOLCADRAFT_99471	phospholipase D [EC:3.1.4.4]	GO:0006098//pentose-phosphate shunt;GO:0016117//carotenoid biosynthetic process;GO:0043085//positive regulation of catalytic activity;GO:0010207//photosystem II assembly;GO:0010019//chloroplast-nucleus signaling pathway;GO:0015995//chlorophyll biosynthetic process;GO:0009965//leaf morphogenesis;GO:0030154//cell differentiation;GO:0019344//cysteine biosynthetic process;GO:0045893//positive regulat…	GO:0046906//tetrapyrrole binding;GO:0019899//enzyme binding	GO:0009507//chloroplast
348	CSE_Unigene15817	SW_Unigene7255	-	-	+(Mostly)	942	0.994	6	5	1	0.0588964	0.00290383	gi|297743811|emb|CBI36694.3|	unnamed protein product [Vitis vinifera]	gi|359478137|ref|XM_002268829.2|	PREDICTED: Vitis vinifera uncharacterized LOC100247353 (LOC100247353), mRNA	-	-	-	-	-	-	-	-	-	-
349	CSE_Unigene17944	SW_Unigene356	-	-	+(Mostly)	1374	0.993	10	7	3	0.137499	0.000342046	gi|297745171|emb|CBI39163.3|	unnamed protein product [Vitis vinifera]	gi|225433775|ref|XM_002268663.1|	PREDICTED: Vitis vinifera uncharacterized LOC100253226 (LOC100253226), mRNA	sp|Q0WMN5|Y3913_ARATH	Uncharacterized protein At3g49140 OS=Arabidopsis thaliana GN=At3g49140 PE=1 SV=2	-	-	-	-	-	GO:0055114//oxidation-reduction process	GO:0016491//oxidoreductase activity;GO:0010181//FMN binding	GO:0005634//nucleus
350	CSE_CL1216_Contig4	SW_CL4854_Contig5	-	-	+(Mostly)	672	0.999	1	1	NA	0	NA	gi|225432153|ref|XP_002265997.1|	PREDICTED: S-adenosyl-L-methionine-dependent methyltransferase-like [Vitis vinifera] >gi|297736798|emb|CBI25999.3| unnamed protein product [Vitis vinifera]	gi|225432152|ref|XM_002265961.1|	PREDICTED: Vitis vinifera S-adenosyl-L-methionine-dependent methyltransferase-like (LOC100249334), mRNA	-	-	-	-	-	-	-	GO:0032259//methylation	GO:0008168//methyltransferase activity	GO:0005886//plasma membrane
351	CSE_Unigene1105	SW_Unigene17035	-	-	+(Mostly)	1755	0.994	10	5	5	0.397944	0.12597	gi|225432183|ref|XP_002268377.1|	PREDICTED: guanosine-3&apos;,5&apos;-bis(diphosphate) 3&apos;-pyrophosphohydrolase [Vitis vinifera] >gi|297736813|emb|CBI26014.3| unnamed protein product [Vitis vinifera]	gi|359477300|ref|XM_002268341.2|	PREDICTED: Vitis vinifera guanosine-3',5'-bis(diphosphate) 3'-pyrophosphohydrolase-like (LOC100263094), mRNA	sp|Q8VWY6|POLC1_TOBAC	Polcalcin Nic t 1 OS=Nicotiana tabacum GN=Nict1 PE=1 SV=1	COG0317	Guanosine polyphosphate pyrophosphohydrolases/synthetases	K13448	pop:POPTR_767565	calcium-binding protein CML	GO:0016310//phosphorylation;GO:0015969//guanosine tetraphosphate metabolic process	GO:0008893//guanosine-3',5'-bis(diphosphate) 3'-diphosphatase activity;GO:0008728//GTP diphosphokinase activity;GO:0016301//kinase activity;GO:0005509//calcium ion binding	GO:0009507//chloroplast
352	CSE_Unigene387	SW_Unigene22487	-	-	+(Mostly)	2085	0.993	15	8	7	0.288864	0.0170538	gi|225432238|ref|XP_002275635.1|	PREDICTED: DEAD-box ATP-dependent RNA helicase 50-like [Vitis vinifera]	gi|359477272|ref|XM_002275599.2|	PREDICTED: Vitis vinifera DEAD-box ATP-dependent RNA helicase 50-like (LOC100245866), mRNA	sp|Q8GUG7|RH50_ARATH	DEAD-box ATP-dependent RNA helicase 50 OS=Arabidopsis thaliana GN=RH50 PE=2 SV=2	COG0513	Superfamily II DNA and RNA helicases	K13179	sbi:SORBI_01g050040	ATP-dependent RNA helicase DDX18/HAS1 [EC:3.6.4.13]	GO:0010103//stomatal complex morphogenesis;GO:0006399//tRNA metabolic process;GO:0071369//cellular response to ethylene stimulus;GO:0006655//phosphatidylglycerol biosynthetic process;GO:0009793//embryo development ending in seed dormancy;GO:0071446//cellular response to salicylic acid stimulus;GO:0019288//isopentenyl diphosphate biosynthetic process, mevalonate-independent pathway;GO:0071395//cel…	GO:0003676//nucleic acid binding;GO:0004004//ATP-dependent RNA helicase activity;GO:0005524//ATP binding	GO:0009507//chloroplast
353	CSE_Unigene23316	SW_Unigene10216	-	-	+(Mostly)	471	1	0	NA	NA	NA	NA	gi|359477281|ref|XP_003631958.1|	PREDICTED: pentatricopeptide repeat-containing protein At3g06920-like [Vitis vinifera]	gi|359477280|ref|XM_003631910.1|	PREDICTED: Vitis vinifera pentatricopeptide repeat-containing protein At3g06920-like (LOC100249392), mRNA	sp|Q9M907|PP217_ARATH	Pentatricopeptide repeat-containing protein At3g06920 OS=Arabidopsis thaliana GN=At3g06920 PE=2 SV=1	-	-	K15336	vvi:100259391	tRNA (cytosine38-C5)-methyltransferase [EC:2.1.1.204]	-	-	-
354	CSE_Unigene11999	SW_Unigene6118	-	-	+(Mostly)	660	0.998	1	1	NA	0	NA	gi|225432292|ref|XP_002273101.1|	PREDICTED: vesicle-associated membrane protein 724 isoform 1 [Vitis vinifera] >gi|297736869|emb|CBI26070.3| unnamed protein product [Vitis vinifera]	gi|359477409|ref|XM_002273065.2|	PREDICTED: Vitis vinifera vesicle-associated membrane protein 724-like, transcript variant 1 (LOC100254439), mRNA	sp|O23429|VA724_ARATH	Vesicle-associated membrane protein 724 OS=Arabidopsis thaliana GN=VAMP724 PE=2 SV=2	COG5143	Synaptobrevin/VAMP-like protein	K08511	ath:AT4G15780	vesicle-associated membrane protein 72	GO:0048573//photoperiodism, flowering;GO:0016192//vesicle-mediated transport	-	GO:0005886//plasma membrane;GO:0016021//integral to membrane
355	CSE_Unigene20436	SW_Unigene10716	-	-	+(Mostly)	3210	0.994	20	10.8777	9.12232	0.297272	0.00585625	gi|225432320|ref|XP_002276207.1|	PREDICTED: isoleucyl-tRNA synthetase-like [Vitis vinifera]	gi|225432319|ref|XM_002276171.1|	PREDICTED: Vitis vinifera isoleucyl-tRNA synthetase-like (LOC100254604), mRNA	sp|P93736|SYV_ARATH	Valine-tRNA ligase OS=Arabidopsis thaliana GN=VALRS PE=1 SV=2	COG0060	Isoleucyl-tRNA synthetase	K01870	vvi:100254604	isoleucyl-tRNA synthetase [EC:6.1.1.5]	GO:0016117//carotenoid biosynthetic process;GO:0009793//embryo development ending in seed dormancy;GO:0006450//regulation of translational fidelity;GO:0016226//iron-sulfur cluster assembly;GO:0006428//isoleucyl-tRNA aminoacylation;GO:0010228//vegetative to reproductive phase transition of meristem;GO:0048481//ovule development;GO:0010027//thylakoid membrane organization	GO:0004822//isoleucine-tRNA ligase activity;GO:0002161//aminoacyl-tRNA editing activity;GO:0005524//ATP binding	GO:0009570//chloroplast stroma
356	CSE_Unigene15605	SW_Unigene12750	-	-	+(Mostly)	894	0.993	6	6	NA	0	NA	gi|359477453|ref|XP_003631980.1|	PREDICTED: prolyl 4-hydroxylase subunit alpha-1 isoform 2 [Vitis vinifera] >gi|297736941|emb|CBI26142.3| unnamed protein product [Vitis vinifera]	gi|359477452|ref|XM_003631932.1|	PREDICTED: Vitis vinifera prolyl 4-hydroxylase subunit alpha-1-like, transcript variant 2 (LOC100245913), mRNA	-	-	-	-	K00472	vvi:100245913	prolyl 4-hydroxylase [EC:1.14.11.2]	GO:0055114//oxidation-reduction process;GO:0016049//cell growth;GO:0000902//cell morphogenesis;GO:0018401//peptidyl-proline hydroxylation to 4-hydroxy-L-proline;GO:0048193//Golgi vesicle transport	GO:0004656//procollagen-proline 4-dioxygenase activity;GO:0031418//L-ascorbic acid binding;GO:0005506//iron ion binding	GO:0005576//extracellular region;GO:0005783//endoplasmic reticulum;GO:0005794//Golgi apparatus;GO:0005634//nucleus
357	CSE_CL1943_Contig1	SW_Unigene12529	-	-	+(Mostly)	963	0.992	8	5	3	0.23935	0.0481671	gi|359477457|ref|XP_002278619.2|	PREDICTED: uncharacterized protein LOC100252741 [Vitis vinifera] >gi|297736943|emb|CBI26144.3| unnamed protein product [Vitis vinifera]	gi|359477456|ref|XM_002278583.2|	PREDICTED: Vitis vinifera uncharacterized LOC100252741 (LOC100252741), mRNA	sp|Q93W28|Y4554_ARATH	Uncharacterized protein At4g15545 OS=Arabidopsis thaliana GN=At4g15545 PE=1 SV=1	-	-	-	-	-	GO:0046777//protein autophosphorylation;GO:0042744//hydrogen peroxide catabolic process;GO:0009750//response to fructose stimulus;GO:0009651//response to salt stress;GO:0010075//regulation of meristem growth;GO:0009637//response to blue light;GO:0010155//regulation of proton transport;GO:0006833//water transport	-	-
358	CSE_Unigene241	SW_Unigene15386	-	-	+(Mostly)	519	0.994	3	2	1	0.144861	0.118643	gi|225432538|ref|XP_002280487.1|	PREDICTED: protein phosphatase Slingshot homolog [Vitis vinifera] >gi|297736986|emb|CBI26187.3| unnamed protein product [Vitis vinifera]	gi|225432537|ref|XM_002280451.1|	PREDICTED: Vitis vinifera protein phosphatase Slingshot homolog-like (LOC100264956), mRNA	sp|Q9ZR37|DUS1_ARATH	Dual specificity protein phosphatase 1 OS=Arabidopsis thaliana GN=DSPTP1 PE=1 SV=1	COG2453	Predicted protein-tyrosine phosphatase	K05766	ath:AT3G23610	slingshot	GO:0071472//cellular response to salt stress;GO:0009611//response to wounding;GO:0000188//inactivation of MAPK activity;GO:0070417//cellular response to cold;GO:0034605//cellular response to heat;GO:0006661//phosphatidylinositol biosynthetic process;GO:0010193//response to ozone;GO:0006470//protein dephosphorylation	GO:0008138//protein tyrosine/serine/threonine phosphatase activity;GO:0033549//MAP kinase phosphatase activity;GO:0005516//calmodulin binding	GO:0009507//chloroplast;GO:0005886//plasma membrane;GO:0005634//nucleus
359	CSE_Unigene18875	SW_Unigene12269	-	-	+(Mostly)	2313	0.995	12	9	3	0.0914098	0.000117462	gi|297737022|emb|CBI26223.3|	unnamed protein product [Vitis vinifera]	gi|301318137|gb|HM369804.1|	Vitis vinifera cultivar PN40024 chloride channel ClC6 mRNA, complete cds	sp|P92943|CLCD_ARATH	Chloride channel protein CLC-d OS=Arabidopsis thaliana GN=CLC-D PE=1 SV=2	COG0038	Chloride channel protein EriC	K05016	vvi:100261408	chloride channel 7	GO:0030002//cellular anion homeostasis;GO:0007155//cell adhesion;GO:0045010//actin nucleation;GO:0006821//chloride transport;GO:0009826//unidimensional cell growth;GO:0010090//trichome morphogenesis;GO:0010038//response to metal ion;GO:0048765//root hair cell differentiation;GO:0055085//transmembrane transport;GO:0071555//cell wall organization	GO:0005247//voltage-gated chloride channel activity	GO:0005802//trans-Golgi network;GO:0016021//integral to membrane
360	CSE_Unigene17086	SW_Unigene6623	-	-	+(Mostly)	849	0.993	6	3	3	0.314212	0.153924	gi|225432658|ref|XP_002282361.1|	PREDICTED: imidazoleglycerol-phosphate dehydratase 2-like [Vitis vinifera]	gi|359477519|ref|XM_002282325.2|	PREDICTED: Vitis vinifera imidazoleglycerol-phosphate dehydratase 2-like (LOC100264953), mRNA	sp|Q43072|HIS7_PEA	Imidazoleglycerol-phosphate dehydratase OS=Pisum sativum GN=HIS3 PE=2 SV=1	COG0131	Imidazoleglycerol-phosphate dehydratase	K01693	vvi:100264953	imidazoleglycerol-phosphate dehydratase [EC:4.2.1.19]	GO:0000105//histidine biosynthetic process	GO:0004424//imidazoleglycerol-phosphate dehydratase activity	GO:0009507//chloroplast
361	CSE_Unigene13312	SW_Unigene7844	-	-	+(Mostly)	1689	0.993	11	8	3	0.131037	0.00157693	gi|297737084|emb|CBI26285.3|	unnamed protein product [Vitis vinifera]	gi|225432733|ref|XM_002278999.1|	PREDICTED: Vitis vinifera ATP-dependent RNA helicase SUPV3L1, mitochondrial-like (LOC100264771), mRNA	-	-	COG0513	Superfamily II DNA and RNA helicases	-	-	-	GO:0009561//megagametogenesis;GO:0016070//RNA metabolic process;GO:0009555//pollen development	GO:0004004//ATP-dependent RNA helicase activity;GO:0003676//nucleic acid binding;GO:0005524//ATP binding	GO:0005739//mitochondrion
362	CSE_Unigene482	SW_Unigene4551	-	-	+(Mostly)	1308	0.989	15	7	8	0.394147	0.065023	gi|225432943|ref|XP_002284351.1|	PREDICTED: uncharacterized protein LOC100263172 isoform 2 [Vitis vinifera]	gi|349725772|emb|FQ393724.1|	Vitis vinifera clone SS0AFA24YJ20	-	-	-	-	-	-	-	-	-	GO:0005634//nucleus;GO:0005737//cytoplasm
363	CSE_Unigene17654	SW_Unigene21488	-	-	+(Mostly)	1416	0.989	16	11	5	0.142086	0.0001929	gi|225433514|ref|XP_002267004.1|	PREDICTED: selenium-binding protein 1 [Vitis vinifera] >gi|298205245|emb|CBI17304.3| unnamed protein product [Vitis vinifera]	gi|225433513|ref|XM_002266968.1|	PREDICTED: Vitis vinifera selenium-binding protein 1-like (LOC100265737), mRNA	sp|O23264|SEBP1_ARATH	Selenium-binding protein 1 OS=Arabidopsis thaliana GN=SBP1 PE=1 SV=1	-	-	-	-	-	GO:0046686//response to cadmium ion;GO:0010197//polar nucleus fusion;GO:0071291//cellular response to selenium ion;GO:0042542//response to hydrogen peroxide;GO:0000103//sulfate assimilation	GO:0008430//selenium binding	-
364	CSE_Unigene12048	SW_Unigene8879	-	-	+(Mostly)	753	0.999	1	1	NA	0	NA	gi|225433053|ref|XP_002284752.1|	PREDICTED: electron transfer flavoprotein subunit beta, mitochondrial [Vitis vinifera] >gi|296083620|emb|CBI23609.3| unnamed protein product [Vitis vinifera]	gi|225433052|ref|XM_002284716.1|	PREDICTED: Vitis vinifera electron transfer flavoprotein subunit beta, mitochondrial-like (LOC100256297), mRNA	sp|Q9LSW8|ETFB_ARATH	Electron transfer flavoprotein subunit beta, mitochondrial OS=Arabidopsis thaliana GN=ETFB PE=1 SV=1	COG2086	Electron transfer flavoprotein, beta subunit	K03521	vvi:100256297	electron transfer flavoprotein beta subunit	GO:0022900//electron transport chain;GO:0019243//methylglyoxal catabolic process to D-lactate;GO:0006552//leucine catabolic process;GO:0015996//chlorophyll catabolic process	GO:0009055//electron carrier activity	GO:0005759//mitochondrial matrix
365	CSE_CL5865_Contig2	SW_CL796_Contig1	-	-	+(Mostly)	1224	0.993	8	2.62493	5.37507	0.710067	0.596513	gi|296083662|emb|CBI23651.3|	unnamed protein product [Vitis vinifera]	gi|359477739|ref|XM_002281299.2|	PREDICTED: Vitis vinifera protein tas-like (LOC100259668), mRNA	sp|O23016|KCAB_ARATH	Probable voltage-gated potassium channel subunit beta OS=Arabidopsis thaliana GN=KAB1 PE=1 SV=1	COG0667	Predicted oxidoreductases (related to aryl-alcohol dehydrogenases)	K14521	vcn:VOLCADRAFT_98273	N-acetyltransferase 10 [EC:2.3.1.-]	GO:0019288//isopentenyl diphosphate biosynthetic process, mevalonate-independent pathway;GO:0055114//oxidation-reduction process	GO:0004032//alditol:NADP+ 1-oxidoreductase activity	GO:0009941//chloroplast envelope;GO:0009570//chloroplast stroma
366	CSE_Unigene17244	SW_Unigene15515	-	-	+(Mostly)	813	0.97	24	9	15	0.702944	0.496796	gi|147833017|emb|CAN66121.1|	hypothetical protein VITISV_002805 [Vitis vinifera]	gi|359477671|ref|XM_002285290.2|	PREDICTED: Vitis vinifera probable plastid-lipid-associated protein 6, chloroplastic-like (LOC100254627), mRNA	sp|Q9LW57|PAP6_ARATH	Probable plastid-lipid-associated protein 6, chloroplastic OS=Arabidopsis thaliana GN=PAP6 PE=1 SV=1	-	-	-	-	-	-	GO:0005198//structural molecule activity	GO:0010287//plastoglobule;GO:0031977//thylakoid lumen;GO:0005886//plasma membrane;GO:0005634//nucleus;GO:0009535//chloroplast thylakoid membrane
367	CSE_Unigene12476	SW_Unigene18542	-	-	+(Mostly)	834	0.989	9	7	2	0.101839	0.00194082	gi|296083731|emb|CBI23720.3|	unnamed protein product [Vitis vinifera]	gi|359477775|ref|XM_002285433.2|	PREDICTED: Vitis vinifera uncharacterized LOC100261382 (LOC100261382), mRNA	sp|P19684|ROC5_NICSY	33 kDa ribonucleoprotein, chloroplastic OS=Nicotiana sylvestris PE=1 SV=1	COG0724	RNA-binding proteins (RRM domain)	K11294	smo:SELMODRAFT_15428	nucleolin	-	GO:0003676//nucleic acid binding;GO:0000166//nucleotide binding	GO:0030529//ribonucleoprotein complex
368	CSE_CL2752_Contig3	SW_CL3940_Contig1	-	-	+(Mostly)	1329	0.994	8	5.8499	2.1501	0.115782	0.00339061	gi|225433343|ref|XP_002285592.1|	PREDICTED: uncharacterized protein all1601 [Vitis vinifera] >gi|297741879|emb|CBI33314.3| unnamed protein product [Vitis vinifera]	gi|359477862|ref|XM_002285556.2|	PREDICTED: Vitis vinifera uncharacterized LOC100254621 (LOC100254621), mRNA	sp|Q8GS60|HCAR_ARATH	7-hydroxymethyl chlorophyll a reductase, chloroplastic OS=Arabidopsis thaliana GN=HCAR PE=1 SV=1	COG1035	Coenzyme F420-reducing hydrogenase, beta subunit	K00441	vvi:100254621	coenzyme F420 hydrogenase beta subunit [EC:1.12.98.1]	GO:0033354//chlorophyll cycle;GO:0055114//oxidation-reduction process	GO:0090415//7-hydroxymethyl chlorophyll a reductase activity;GO:0050502//cis-zeatin O-beta-D-glucosyltransferase activity;GO:0050403//trans-zeatin O-beta-D-glucosyltransferase activity;GO:0050454//coenzyme F420 hydrogenase activity	GO:0009507//chloroplast
369	CSE_Unigene17763	SW_Unigene4296	-	-	+(Mostly)	1062	0.989	12	4	8	0.734423	0.720905	gi|225433391|ref|XP_002285620.1|	PREDICTED: GDT1-like protein 2, chloroplastic [Vitis vinifera] >gi|297741903|emb|CBI33338.3| unnamed protein product [Vitis vinifera]	gi|359477861|ref|XM_002285584.2|	PREDICTED: Vitis vinifera GDT1-like protein 2, chloroplastic (LOC100256177), mRNA	sp|Q9T0H9|GDT12_ARATH	GDT1-like protein 2, chloroplastic OS=Arabidopsis thaliana GN=At4g13590 PE=1 SV=2	COG2119	Predicted membrane protein	-	-	-	-	-	GO:0016021//integral to membrane;GO:0009706//chloroplast inner membrane
370	CSE_CL3715_Contig1	SW_Unigene13954	-	-	+(Mostly)	1833	0.995	9	4.74774	4.25226	0.33978	0.0714301	gi|225433434|ref|XP_002285667.1|	PREDICTED: dihydroxy-acid dehydratase-like [Vitis vinifera]	gi|359477803|ref|XM_002285631.2|	PREDICTED: Vitis vinifera dihydroxy-acid dehydratase-like (LOC100242520), mRNA	-	-	COG0129	Dihydroxyacid dehydratase/phosphogluconate dehydratase	K01687	vvi:100242520	dihydroxy-acid dehydratase [EC:4.2.1.9]	GO:0009220//pyrimidine ribonucleotide biosynthetic process;GO:0009555//pollen development;GO:0009082//branched-chain amino acid biosynthetic process	GO:0005507//copper ion binding;GO:0004160//dihydroxy-acid dehydratase activity	GO:0005829//cytosol;GO:0009570//chloroplast stroma
371	CSE_Unigene1408	SW_Unigene12982	-	-	+(Mostly)	1029	0.983	18	12	6	0.162278	0.000209548	gi|225433680|ref|XP_002265738.1|	PREDICTED: uncharacterized protein LOC100266927 [Vitis vinifera] >gi|296089617|emb|CBI39436.3| unnamed protein product [Vitis vinifera]	gi|147838016|emb|AM446045.2|	Vitis vinifera contig VV78X139536.5, whole genome shotgun sequence	-	-	-	-	-	-	-	GO:0009793//embryo development ending in seed dormancy	-	GO:0005634//nucleus;GO:0009536//plastid
372	CSE_Unigene17948	SW_Unigene22645	-	-	+(Mostly)	1875	0.995	9	8	1	0.0391232	7.50699e-05	gi|225433705|ref|XP_002267875.1|	PREDICTED: ATP-dependent DNA helicase 2 subunit KU70 [Vitis vinifera] >gi|296089629|emb|CBI39448.3| unnamed protein product [Vitis vinifera]	gi|359477993|ref|XM_002267839.2|	PREDICTED: Vitis vinifera ATP-dependent DNA helicase 2 subunit KU70-like (LOC100265198), mRNA	sp|Q9FQ08|KU70_ARATH	ATP-dependent DNA helicase 2 subunit KU70 OS=Arabidopsis thaliana GN=KU70 PE=1 SV=1	-	-	K10884	vvi:100265198	ATP-dependent DNA helicase 2 subunit 1	GO:0006310//DNA recombination;GO:0000723//telomere maintenance;GO:0009408//response to heat;GO:0006303//double-strand break repair via nonhomologous end joining	GO:0042162//telomeric DNA binding;GO:0003684//damaged DNA binding;GO:0003690//double-stranded DNA binding;GO:0004003//ATP-dependent DNA helicase activity;GO:0005524//ATP binding;GO:0005515//protein binding	GO:0043564//Ku70:Ku80 complex;GO:0005958//DNA-dependent protein kinase-DNA ligase 4 complex
373	CSE_Unigene18897	SW_Unigene12227	-	-	+(Mostly)	2133	0.991	20	10	10	0.319645	0.0112309	gi|296083212|emb|CBI22848.3|	unnamed protein product [Vitis vinifera]	gi|359477101|ref|XM_002280149.2|	PREDICTED: Vitis vinifera uncharacterized LOC100246610 (LOC100246610), mRNA	sp|Q8GYX8|DNJ10_ARATH	Chaperone protein dnaJ 10 OS=Arabidopsis thaliana GN=ATJ10 PE=2 SV=2	COG2214	DnaJ-class molecular chaperone	K09534	osa:4352775	DnaJ homolog subfamily C member 14	-	-	-
374	CSE_Unigene20003	SW_Unigene19475	-	-	+(Mostly)	2349	0.984	22	16	6	0.114239	1.48863e-07	gi|359477208|ref|XP_002279515.2|	PREDICTED: flowering time control protein FCA [Vitis vinifera]	gi|359477207|ref|XM_002279479.2|	PREDICTED: Vitis vinifera flowering time control (FCA), mRNA	sp|O04425|FCA_ARATH	Flowering time control protein FCA OS=Arabidopsis thaliana GN=FCA PE=1 SV=2	COG5648	Chromatin-associated proteins containing the HMG domain	K13207	ppp:PHYPADRAFT_115029	CUG-BP- and ETR3-like factor	GO:0031048//chromatin silencing by small RNA;GO:0009790//embryo development;GO:0007059//chromosome segregation;GO:0022402//cell cycle process;GO:0009553//embryo sac development;GO:0009909//regulation of flower development;GO:0048316//seed development	GO:0003723//RNA binding;GO:0010427//abscisic acid binding	GO:0044446//intracellular organelle part
375	CSE_Unigene1214	SW_Unigene17866	-	-	+(Mostly)	801	0.989	9	6	3	0.154425	0.00759949	gi|225431978|ref|XP_002278726.1|	PREDICTED: 3-hydroxypropionyl-coenzyme A dehydratase [Vitis vinifera] >gi|296083235|emb|CBI22871.3| unnamed protein product [Vitis vinifera]	gi|225431977|ref|XM_002278690.1|	PREDICTED: Vitis vinifera 3-hydroxypropionyl-coenzyme A dehydratase-like (LOC100246523), mRNA	sp|Q8GYN9|MENB_ARATH	1,4-Dihydroxy-2-naphthoyl-CoA synthase, peroxisomal OS=Arabidopsis thaliana GN=MENB PE=1 SV=2	COG1024	Enoyl-CoA hydratase/carnithine racemase	K01661	vvi:100246470	naphthoate synthase [EC:4.1.3.36]	GO:0006635//fatty acid beta-oxidation	GO:0016853//isomerase activity;GO:0004300//enoyl-CoA hydratase activity	GO:0005777//peroxisome;GO:0005829//cytosol;GO:0005739//mitochondrion
376	CSE_CL2859_Contig2	SW_Unigene5947	-	-	+(Mostly)	1785	0.992	15	10	5	0.173686	0.00108654	gi|225431946|ref|XP_002277743.1|	PREDICTED: aldehyde dehydrogenase 22A1 [Vitis vinifera] >gi|296083253|emb|CBI22889.3| unnamed protein product [Vitis vinifera]	gi|225431945|ref|XM_002277707.1|	PREDICTED: Vitis vinifera aldehyde dehydrogenase 22A1-like (LOC100249882), mRNA	sp|Q0WSF1|AL221_ARATH	Aldehyde dehydrogenase 22A1 OS=Arabidopsis thaliana GN=ALDH22A1 PE=2 SV=2	COG1012	NAD-dependent aldehyde dehydrogenases	K00130	osa:4345606	betaine-aldehyde dehydrogenase [EC:1.2.1.8]	GO:0009086//methionine biosynthetic process;GO:0055114//oxidation-reduction process;GO:0000394//RNA splicing, via endonucleolytic cleavage and ligation	GO:0004028//3-chloroallyl aldehyde dehydrogenase activity;GO:0004029//aldehyde dehydrogenase (NAD) activity	GO:0016023//cytoplasmic membrane-bounded vesicle;GO:0005783//endoplasmic reticulum
377	CSE_CL4572_Contig2	SW_Unigene11849	-	-	+(Mostly)	477	0.996	2	1	1	0.360896	0.391232	gi|225431940|ref|XP_002277653.1|	PREDICTED: universal stress protein A-like protein isoform 1 [Vitis vinifera]	gi|225431939|ref|XM_002277617.1|	PREDICTED: Vitis vinifera universal stress protein A-like protein, transcript variant 1 (LOC100255026), mRNA	sp|Q8LGG8|USPAL_ARATH	Universal stress protein A-like protein OS=Arabidopsis thaliana GN=At3g01520 PE=1 SV=2	COG0589	Universal stress protein UspA and related nucleotide-binding proteins	-	-	-	GO:0006623//protein targeting to vacuole;GO:0009409//response to cold;GO:0002238//response to molecule of fungal origin	-	GO:0005737//cytoplasm;GO:0005886//plasma membrane
378	CSE_CL5883_Contig2	SW_Unigene20160	-	-	+(Mostly)	1884	0.989	20	8	12	0.568033	0.213714	gi|359477163|ref|XP_002271327.2|	PREDICTED: WD repeat-containing protein 43-like [Vitis vinifera] >gi|296083309|emb|CBI22945.3| unnamed protein product [Vitis vinifera]	gi|359477162|ref|XM_002271291.2|	PREDICTED: Vitis vinifera WD repeat-containing protein 43-like (LOC100251740), mRNA	-	-	COG2319	FOG: WD40 repeat	K14546	vvi:100251740	U3 small nucleolar RNA-associated protein 5	GO:0009909//regulation of flower development;GO:0009220//pyrimidine ribonucleotide biosynthetic process;GO:0000478//endonucleolytic cleavage involved in rRNA processing	GO:0000166//nucleotide binding	GO:0005634//nucleus
379	CSE_CL4496_Contig1	SW_Unigene22999	-	-	+(Mostly)	696	0.977	16	8	8	0.345556	0.0336252	gi|359478215|ref|XP_002274062.2|	PREDICTED: probable FKBP-type peptidyl-prolyl cis-trans isomerase 2, chloroplastic-like [Vitis vinifera] >gi|296084250|emb|CBI24638.3| unnamed protein product [Vitis vinifera]	gi|359478214|ref|XM_002274026.2|	PREDICTED: Vitis vinifera probable FKBP-type peptidyl-prolyl cis-trans isomerase 2, chloroplastic-like (LOC100259438), mRNA	sp|O22870|FK163_ARATH	Peptidyl-prolyl cis-trans isomerase FKBP16-3, chloroplastic OS=Arabidopsis thaliana GN=FKBP16-3 PE=1 SV=2	COG0545	FKBP-type peptidyl-prolyl cis-trans isomerases 1	K01802	aly:ARALYDRAFT_483467	peptidylprolyl isomerase [EC:5.2.1.8]	GO:0006098//pentose-phosphate shunt;GO:0006457//protein folding;GO:0010207//photosystem II assembly;GO:0019288//isopentenyl diphosphate biosynthetic process, mevalonate-independent pathway;GO:0000413//protein peptidyl-prolyl isomerization;GO:0006364//rRNA processing;GO:0010027//thylakoid membrane organization	GO:0005528//FK506 binding;GO:0003755//peptidyl-prolyl cis-trans isomerase activity	GO:0016020//membrane;GO:0009570//chloroplast stroma;GO:0009543//chloroplast thylakoid lumen
380	CSE_CL6058_Contig1	SW_Unigene22088	-	-	+(Mostly)	1995	0.991	18	3	15	1.71884	0.582381	gi|359478275|ref|XP_002274820.2|	PREDICTED: uncharacterized protein LOC100249037 [Vitis vinifera] >gi|296084312|emb|CBI24700.3| unnamed protein product [Vitis vinifera]	gi|359478274|ref|XM_002274784.2|	PREDICTED: Vitis vinifera uncharacterized LOC100249037 (LOC100249037), mRNA	sp|Q9FN48|CAS_ARATH	Calcium sensing receptor, chloroplastic OS=Arabidopsis thaliana GN=CAS PE=1 SV=1	-	-	-	-	-	GO:0006098//pentose-phosphate shunt;GO:0019288//isopentenyl diphosphate biosynthetic process, mevalonate-independent pathway;GO:0016117//carotenoid biosynthetic process;GO:0000023//maltose metabolic process;GO:0019252//starch biosynthetic process;GO:0043085//positive regulation of catalytic activity	-	GO:0009534//chloroplast thylakoid;GO:0005634//nucleus
381	CSE_CL7408_Contig3	SW_Unigene11047	-	-	+(Mostly)	945	0.978	15	9.83213	5.16787	0.171039	0.000728894	gi|359478237|ref|XP_002275927.2|	PREDICTED: uncharacterized protein LOC100264576 [Vitis vinifera]	gi|359478236|ref|XM_002275891.2|	PREDICTED: Vitis vinifera uncharacterized LOC100264576 (LOC100264576), mRNA	sp|Q4LDF9|OEP37_PEA	Outer envelope pore protein 37, chloroplastic OS=Pisum sativum GN=OEP37 PE=1 SV=1	-	-	-	-	-	GO:0006812//cation transport	GO:0005216//ion channel activity	GO:0031359//integral to chloroplast outer membrane;GO:0005634//nucleus;GO:0009706//chloroplast inner membrane;GO:0005739//mitochondrion
382	CSE_Unigene19579	SW_Unigene12028	-	-	+(Mostly)	960	0.99	10	5	5	0.369552	0.105445	gi|225434233|ref|XP_002280271.1|	PREDICTED: probable uridine nucleosidase 2 [Vitis vinifera] >gi|296084370|emb|CBI24758.3| unnamed protein product [Vitis vinifera]	gi|225434232|ref|XM_002280235.1|	PREDICTED: Vitis vinifera probable uridine nucleosidase 2-like (LOC100254160), mRNA	sp|Q8LAC4|URH2_ARATH	Probable uridine nucleosidase 2 OS=Arabidopsis thaliana GN=URH2 PE=2 SV=1	COG1957	Inosine-uridine nucleoside N-ribohydrolase	K01240	ppp:PHYPADRAFT_137777	uridine nucleosidase [EC:3.2.2.3]	GO:0006148//inosine catabolic process;GO:0010150//leaf senescence	GO:0035251//UDP-glucosyltransferase activity;GO:0047724//inosine nucleosidase activity	GO:0005829//cytosol
383	CSE_Unigene19608	SW_Unigene15212	-	-	+(Mostly)	2166	0.997	7	4	3	0.257211	0.0760601	gi|297745732|emb|CBI15788.3|	unnamed protein product [Vitis vinifera]	gi|225434290|ref|XM_002275824.1|	PREDICTED: Vitis vinifera MAU2 chromatid cohesion factor homolog (LOC100253529), mRNA	-	-	-	-	K11266	vvi:100253529	MAternally affected uncoordination	GO:0000956//nuclear-transcribed mRNA catabolic process;GO:0006487//protein N-linked glycosylation	-	GO:0005634//nucleus
384	CSE_CL4530_Contig1	SW_Unigene15417	-	-	+(Mostly)	1446	0.989	16	8	8	0.305958	0.0193404	gi|359478497|ref|XP_002276707.2|	PREDICTED: uncharacterized protein LOC100255308 [Vitis vinifera]	gi|359478496|ref|XM_002276671.2|	PREDICTED: Vitis vinifera uncharacterized LOC100255308 (LOC100255308), mRNA	sp|O81004|Y2287_ARATH	GTP-binding protein At2g22870 OS=Arabidopsis thaliana GN=EMB2001 PE=2 SV=2	COG0218	Predicted GTPase	K03978	ppp:PHYPADRAFT_148111	GTP-binding protein	GO:0019243//methylglyoxal catabolic process to D-lactate;GO:0000917//barrier septum assembly	GO:0005525//GTP binding	GO:0009507//chloroplast
385	CSE_Unigene1954	SW_Unigene17736	-	-	+(Mostly)	1158	0.988	14	11	3	0.0916249	4.70885e-05	gi|225434449|ref|XP_002277781.1|	PREDICTED: uncharacterized protein At1g18480 [Vitis vinifera] >gi|297745819|emb|CBI15875.3| unnamed protein product [Vitis vinifera]	gi|225434448|ref|XM_002277745.1|	PREDICTED: Vitis vinifera uncharacterized LOC100262041 (LOC100262041), mRNA	sp|Q944L7|Y1480_ARATH	Uncharacterized protein At1g18480 OS=Arabidopsis thaliana GN=At1g18480 PE=2 SV=1	COG0639	Diadenosine tetraphosphatase and related serine/threonine protein phosphatases	-	-	-	GO:0010264//myo-inositol hexakisphosphate biosynthetic process;GO:0042545//cell wall modification;GO:0043086//negative regulation of catalytic activity;GO:0045490//pectin catabolic process	GO:0045330;GO:0030599//pectinesterase activity;GO:0004857//enzyme inhibitor activity;GO:0004722//protein serine/threonine phosphatase activity	GO:0005618//cell wall;GO:0005777//peroxisome;GO:0009507//chloroplast
386	CSE_Unigene13618	SW_Unigene22069	-	-	+(Mostly)	1005	0.988	9	5	4	0.248964	0.0403463	gi|225434524|ref|XP_002276231.1|	PREDICTED: zinc transporter 6, chloroplastic [Vitis vinifera] >gi|297745865|emb|CBI15921.3| unnamed protein product [Vitis vinifera]	gi|359478769|ref|XM_002276195.2|	PREDICTED: Vitis vinifera zinc transporter 6, chloroplastic-like (LOC100250102), mRNA	sp|O64738|ZIP6_ARATH	Zinc transporter 6, chloroplastic OS=Arabidopsis thaliana GN=ZIP6 PE=3 SV=1	COG0428	Predicted divalent heavy-metal cations transporter	K14709	bdi:100827984	solute carrier family 39 (zinc transporter), member 1/2/3	GO:0009624//response to nematode;GO:0071577//zinc ion transmembrane transport;GO:0055114//oxidation-reduction process	GO:0032440//2-alkenal reductase [NAD(P)] activity;GO:0008270//zinc ion binding;GO:0005385//zinc ion transmembrane transporter activity	GO:0005886//plasma membrane;GO:0016021//integral to membrane
387	CSE_Unigene10484	SW_Unigene21350	-	-	+(Mostly)	546	0.991	5	3	2	0.174482	0.00739797	gi|297745938|emb|CBI15994.3|	unnamed protein product [Vitis vinifera]	gi|359478567|ref|XM_002279668.2|	PREDICTED: Vitis vinifera josephin-like protein-like (LOC100243268), mRNA	sp|O82391|JOSL_ARATH	Josephin-like protein OS=Arabidopsis thaliana GN=At2g29640 PE=2 SV=1	-	-	K15235	vvi:100243268	josephin [EC:3.4.19.12]	-	GO:0008242//omega peptidase activity	GO:0005634//nucleus
388	CSE_CL6669_Contig2	SW_CL2820_Contig2	-	-	+(Mostly)	1422	0.997	4	3	1	0.0986848	0.0370214	gi|225434716|ref|XP_002281136.1|	PREDICTED: cytosolic enolase 3-like [Vitis vinifera]	gi|359478884|ref|XM_002281100.2|	PREDICTED: Vitis vinifera cytosolic enolase 3-like (LOC100265663), mRNA	sp|Q9ZW34|ENO3_ARATH	Cytosolic enolase 3 OS=Arabidopsis thaliana GN=ENO3 PE=2 SV=1	COG0148	Enolase	K01689	vvi:100265663	enolase [EC:4.2.1.11]	GO:0006096//glycolysis	GO:0004634//phosphopyruvate hydratase activity;GO:0000287//magnesium ion binding	GO:0000015//phosphopyruvate hydratase complex;GO:0005634//nucleus
389	CSE_CL5609_Contig2	SW_CL2011_Contig1	-	-	+(Mostly)	834	0.989	9	5	4	0.227665	0.0305338	gi|225434865|ref|XP_002282911.1|	PREDICTED: chaperone protein DnaJ isoform 2 [Vitis vinifera] >gi|297746036|emb|CBI16092.3| unnamed protein product [Vitis vinifera]	gi|225434864|ref|XM_002282875.1|	PREDICTED: Vitis vinifera chaperone protein DnaJ-like, transcript variant 2 (LOC100258713), mRNA	sp|Q9SDN0|DNJ20_ARATH	Chaperone protein dnaJ 20, chloroplastic OS=Arabidopsis thaliana GN=ATJ20 PE=2 SV=2	COG0484	DnaJ-class molecular chaperone with C-terminal Zn finger domain	K03686	mtr:MTR_3g087030	molecular chaperone DnaJ	GO:0006457//protein folding	GO:0005515//protein binding	GO:0009507//chloroplast
390	CSE_Unigene11269	SW_Unigene25448	-	-	+(Mostly)	1521	0.995	7	4	3	0.227459	0.0562974	gi|225435038|ref|XP_002281336.1|	PREDICTED: putative pentatricopeptide repeat-containing protein At5g59900 [Vitis vinifera]	gi|123656813|emb|AM455359.1|	Vitis vinifera, whole genome shotgun sequence, contig VV78X061798.12, clone ENTAV 115	sp|Q9LVQ5|PP432_ARATH	Pentatricopeptide repeat-containing protein At5g55840 OS=Arabidopsis thaliana GN=At5g55840 PE=2 SV=2	-	-	K15336	vvi:100259391	tRNA (cytosine38-C5)-methyltransferase [EC:2.1.1.204]	-	-	GO:0005739//mitochondrion
391	CSE_Unigene410	SW_Unigene6106	-	-	+(Mostly)	525	0.996	2	1	1	0.317326	0	gi|297746214|emb|CBI16270.3|	unnamed protein product [Vitis vinifera]	gi|225435223|ref|XM_002282079.1|	PREDICTED: Vitis vinifera uncharacterized LOC100253475 (LOC100253475), mRNA	sp|Q9FJI1|AAK6_ARATH	Adenylate kinase isoenzyme 6 OS=Arabidopsis thaliana GN=AAK6 PE=1 SV=1	COG1936	Predicted nucleotide kinase (related to CMP and AMP kinases)	K14535	vvi:100253475	transcription initiation factor TFIID subunit 9 / adenylate kinase [EC:2.7.4.3]	GO:0016310//phosphorylation	GO:0016301//kinase activity	-
392	CSE_Unigene12745	SW_Unigene15819	-	-	+(Mostly)	978	0.992	8	4	4	0.234529	0.0483299	gi|147780726|emb|CAN60322.1|	hypothetical protein VITISV_002856 [Vitis vinifera]	gi|359479042|ref|XM_002284882.2|	PREDICTED: Vitis vinifera probable exonuclease V-like (LOC100244936), mRNA	sp|Q9FKK6|EXO5_ARATH	Exonuclease V, chloroplastic OS=Arabidopsis thaliana GN=At5g60370 PE=2 SV=1	-	-	-	-	-	-	-	-
393	CSE_Unigene17203	SW_Unigene22456	-	-	+(Mostly)	1329	0.998	3	3	NA	0	NA	gi|225435468|ref|XP_002285479.1|	PREDICTED: uncharacterized RNA-binding protein C23E6.01c-like isoform 1 [Vitis vinifera]	gi|225435467|ref|XM_002285443.1|	PREDICTED: Vitis vinifera uncharacterized LOC100243203, transcript variant 1 (LOC100243203), mRNA	sp|Q8VXZ9|R47BP_ARATH	Polyadenylate-binding protein RBP47B' OS=Arabidopsis thaliana GN=RBP47B' PE=2 SV=1	COG0724	RNA-binding proteins (RRM domain)	K13201	smo:SELMODRAFT_44478	nucleolysin TIA-1/TIAR	-	GO:0003676//nucleic acid binding;GO:0000166//nucleotide binding	GO:0005739//mitochondrion
394	CSE_CL6871_Contig1	SW_CL1366_Contig1	-	-	+(Mostly)	4101	0.992	31	14	17	0.405745	0.0196861	gi|225435470|ref|XP_002285473.1|	PREDICTED: xanthine dehydrogenase/oxidase-like isoform 1 [Vitis vinifera]	gi|225435469|ref|XM_002285437.1|	PREDICTED: Vitis vinifera xanthine dehydrogenase/oxidase-like, transcript variant 1 (LOC100248547), mRNA	sp|Q8GUQ8|XDH1_ARATH	Xanthine dehydrogenase 1 OS=Arabidopsis thaliana GN=XDH1 PE=1 SV=1	COG4631	Xanthine dehydrogenase, molybdopterin-binding subunit B	K00106	vvi:100248547	xanthine dehydrogenase/oxidase [EC:1.17.1.4 1.17.3.2]	GO:0055114//oxidation-reduction process;GO:0009414//response to water deprivation;GO:0000302//response to reactive oxygen species;GO:0006145//purine nucleobase catabolic process;GO:0042554//superoxide anion generation;GO:0046110//xanthine metabolic process	GO:0051537//2 iron, 2 sulfur cluster binding;GO:0009055//electron carrier activity;GO:0004855//xanthine oxidase activity;GO:0004854//xanthine dehydrogenase activity;GO:0050660//flavin adenine dinucleotide binding;GO:0008762//UDP-N-acetylmuramate dehydrogenase activity;GO:0005506//iron ion binding	GO:0005829//cytosol
395	CSE_Unigene14578	SW_Unigene11479	-	-	+(Mostly)	1185	0.992	6	4	2	0.154668	0.030967	gi|225435622|ref|XP_002283329.1|	PREDICTED: probable plastid-lipid-associated protein 12, chloroplastic [Vitis vinifera] >gi|297746405|emb|CBI16461.3| unnamed protein product [Vitis vinifera]	gi|225435621|ref|XM_002283293.1|	PREDICTED: Vitis vinifera probable plastid-lipid-associated protein 12, chloroplastic-like (LOC100257060), mRNA	sp|Q8LAP6|PAP12_ARATH	Probable plastid-lipid-associated protein 12, chloroplastic OS=Arabidopsis thaliana GN=PAP12 PE=2 SV=1	-	-	-	-	-	GO:0006098//pentose-phosphate shunt;GO:0010027//thylakoid membrane organization	GO:0005198//structural molecule activity	GO:0009941//chloroplast envelope;GO:0009535//chloroplast thylakoid membrane
396	CSE_Unigene17206	SW_Unigene21463	-	-	+(Mostly)	1611	0.987	21	7	14	0.676532	0.446304	gi|225436442|ref|XP_002274210.1|	PREDICTED: pheophorbide a oxygenase, chloroplastic [Vitis vinifera] >gi|297734893|emb|CBI17127.3| unnamed protein product [Vitis vinifera]	gi|359479334|ref|XM_002274174.2|	PREDICTED: Vitis vinifera pheophorbide a oxygenase, chloroplastic-like (LOC100256831), mRNA	sp|Q9FYC2|PAO_ARATH	Pheophorbide a oxygenase, chloroplastic OS=Arabidopsis thaliana GN=PAO PE=1 SV=1	COG4638	Phenylpropionate dioxygenase and related ring-hydroxylating dioxygenases, large terminal subunit	K13071	vvi:100256831	pheophorbide a oxygenase [EC:1.14.12.20]	GO:0042744//hydrogen peroxide catabolic process;GO:0009793//embryo development ending in seed dormancy;GO:0009965//leaf morphogenesis;GO:0048481//ovule development;GO:0019761//glucosinolate biosynthetic process;GO:0009693//ethylene biosynthetic process;GO:0032880//regulation of protein localization;GO:0006096//glycolysis;GO:0009816//defense response to bacterium, incompatible interaction;GO:00159…	GO:0032441//pheophorbide a oxygenase activity;GO:0016630//protochlorophyllide reductase activity;GO:0050897//cobalt ion binding;GO:0010277//chlorophyllide a oxygenase [overall] activity;GO:0051537//2 iron, 2 sulfur cluster binding;GO:0008660//1-aminocyclopropane-1-carboxylate deaminase activity;GO:0019148//D-cysteine desulfhydrase activity	GO:0005829//cytosol;GO:0009706//chloroplast inner membrane;GO:0005739//mitochondrion;GO:0009534//chloroplast thylakoid
397	CSE_Unigene14838	SW_Unigene16508	-	-	+(Mostly)	1644	0.993	11	3	8	0.695223	0.629773	gi|225436498|ref|XP_002276131.1|	PREDICTED: alpha-L-fucosidase 1 [Vitis vinifera]	gi|359479351|ref|XM_002276095.2|	PREDICTED: Vitis vinifera alpha-L-fucosidase 1-like (LOC100255173), mRNA	sp|Q8GW72|FUCO1_ARATH	Alpha-L-fucosidase 1 OS=Arabidopsis thaliana GN=FUC1 PE=1 SV=2	COG3669	Alpha-L-fucosidase	K01206	vvi:100255173	alpha-L-fucosidase [EC:3.2.1.51]	GO:0005975//carbohydrate metabolic process;GO:0006516//glycoprotein catabolic process	GO:0043169//cation binding;GO:0004560//alpha-L-fucosidase activity	GO:0005773//vacuole;GO:0005576//extracellular region
398	CSE_Unigene11179	SW_Unigene11343	-	-	+(Mostly)	573	1	0	NA	NA	NA	NA	gi|225436504|ref|XP_002276276.1|	PREDICTED: lactoylglutathione lyase isoform 1 [Vitis vinifera] >gi|297734925|emb|CBI17159.3| unnamed protein product [Vitis vinifera]	gi|359479354|ref|XM_002276240.2|	PREDICTED: Vitis vinifera lactoylglutathione lyase-like, transcript variant 1 (LOC100244888), mRNA	sp|Q9ZS21|LGUL_SOYBN	Lactoylglutathione lyase OS=Glycine max GN=GLXI PE=1 SV=1	COG0346	Lactoylglutathione lyase and related lyases	K01759	vvi:100244888	lactoylglutathione lyase [EC:4.4.1.5]	GO:0006094//gluconeogenesis;GO:0046686//response to cadmium ion;GO:0006096//glycolysis;GO:0009651//response to salt stress	GO:0046872//metal ion binding;GO:0004462//lactoylglutathione lyase activity;GO:0005516//calmodulin binding	GO:0009507//chloroplast;GO:0005829//cytosol
399	CSE_Unigene15986	SW_CL6992_Contig1	-	-	+(Mostly)	1692	0.992	13	6	7	0.414039	0.0983569	gi|225436520|ref|XP_002273662.1|	PREDICTED: dolichol kinase [Vitis vinifera] >gi|297734932|emb|CBI17166.3| unnamed protein product [Vitis vinifera]	gi|225436519|ref|XM_002273626.1|	PREDICTED: Vitis vinifera dolichol kinase-like (LOC100261999), mRNA	-	-	COG0170	Dolichol kinase	K00902	vvi:100261999	dolichol kinase [EC:2.7.1.108]	GO:0031348//negative regulation of defense response;GO:0045087//innate immune response;GO:0010200//response to chitin;GO:0006944//cellular membrane fusion;GO:0030968//endoplasmic reticulum unfolded protein response;GO:0009863//salicylic acid mediated signaling pathway;GO:0008654//phospholipid biosynthetic process;GO:0009697//salicylic acid biosynthetic process	GO:0004168//dolichol kinase activity;GO:0004605//phosphatidate cytidylyltransferase activity	GO:0016021//integral to membrane
400	CSE_Unigene18859	SW_Unigene22416	-	-	+(Mostly)	2232	0.996	10	8	2	0.0847495	0.000468705	gi|255544946|ref|XP_002513534.1|	Magnesium-chelatase subunit chlD, chloroplast precursor, putative [Ricinus communis] >gi|223547442|gb|EEF48937.1| Magnesium-chelatase subunit chlD, chloroplast precursor, putative [Ricinus communis]	gi|349722878|emb|FQ393213.1|	Vitis vinifera clone SS0AFA2YC06	sp|O24133|CHLD_TOBAC	Magnesium-chelatase subunit ChlD, chloroplastic OS=Nicotiana tabacum GN=CHLD PE=2 SV=1	COG1240	Mg-chelatase subunit ChlD	K03404	vvi:100243048	magnesium chelatase subunit D [EC:6.6.1.1]	GO:0019288//isopentenyl diphosphate biosynthetic process, mevalonate-independent pathway;GO:0015995//chlorophyll biosynthetic process;GO:0015979//photosynthesis;GO:0009690//cytokinin metabolic process	GO:0017111//nucleoside-triphosphatase activity;GO:0016851//magnesium chelatase activity;GO:0005524//ATP binding	GO:0010007//magnesium chelatase complex;GO:0009534//chloroplast thylakoid;GO:0009570//chloroplast stroma
401	CSE_Unigene9614	SW_Unigene14560	-	-	+(Mostly)	894	0.991	8	5	3	0.192264	0.0244977	gi|225464820|ref|XP_002270105.1|	PREDICTED: probable receptor-like protein kinase At1g49730 [Vitis vinifera] >gi|296084850|emb|CBI28259.3| unnamed protein product [Vitis vinifera]	gi|225464819|ref|XM_002270069.1|	PREDICTED: Vitis vinifera probable receptor-like protein kinase At1g49730 (LOC100262216), mRNA	sp|Q9FX99|Y1497_ARATH	Probable receptor-like protein kinase At1g49730 OS=Arabidopsis thaliana GN=At1g49730 PE=1 SV=1	COG0515	Serine/threonine protein kinase	K04733	smo:SELMODRAFT_159261	interleukin-1 receptor-associated kinase 4 [EC:2.7.11.1]	GO:0006468//protein phosphorylation	GO:0004672//protein kinase activity;GO:0005524//ATP binding	GO:0005886//plasma membrane;GO:0005739//mitochondrion
402	CSE_Unigene13132	SW_Unigene13913	-	-	+(Mostly)	594	0.988	7	1	6	2.41286	0.585599	gi|225464842|ref|XP_002271410.1|	PREDICTED: transmembrane protein C20orf108 [Vitis vinifera] >gi|296084861|emb|CBI28270.3| unnamed protein product [Vitis vinifera]	gi|225464841|ref|XM_002271374.1|	PREDICTED: Vitis vinifera transmembrane protein C20orf108-like (LOC100258627), mRNA	-	-	-	-	-	-	-	GO:0009965//leaf morphogenesis;GO:0006661//phosphatidylinositol biosynthetic process;GO:0030154//cell differentiation;GO:0045893//positive regulation of transcription, DNA-dependent	-	GO:0016021//integral to membrane;GO:0009535//chloroplast thylakoid membrane
403	CSE_Unigene12869	SW_Unigene22215	-	-	+(Mostly)	879	0.994	5	4	1	0.0977626	0.0228611	gi|296084900|emb|CBI28309.3|	unnamed protein product [Vitis vinifera]	gi|359479502|ref|XM_002274877.2|	PREDICTED: Vitis vinifera N-carbamoylputrescine amidase-like (LOC100260445), mRNA	sp|Q3HVN1|AGUB_SOLTU	N-carbamoylputrescine amidase OS=Solanum tuberosum GN=CPA PE=2 SV=1	COG0388	Predicted amidohydrolase	K12251	vvi:100260445	N-carbamoylputrescine amidase [EC:3.5.1.53]	GO:0033388//putrescine biosynthetic process from arginine	GO:0050126//N-carbamoylputrescine amidase activity	-
404	CSE_Unigene17386	SW_Unigene6892	-	-	+(Mostly)	1140	0.995	6	3	3	0.343346	0.178974	gi|147865290|emb|CAN79825.1|	hypothetical protein VITISV_025116 [Vitis vinifera]	gi|225464987|ref|XM_002277201.1|	PREDICTED: Vitis vinifera histone deacetylase 8-like (LOC100255252), mRNA	sp|Q94EJ2|HDA8_ARATH	Histone deacetylase 8 OS=Arabidopsis thaliana GN=HDA8 PE=2 SV=1	COG0123	Deacetylases, including yeast histone deacetylase and acetoin utilization protein	K11407	ath:AT5G61060	histone deacetylase 6/10 [EC:3.5.1.98]	GO:0016575//histone deacetylation	GO:0004407//histone deacetylase activity	GO:0005634//nucleus
405	CSE_Unigene10010	SW_Unigene11152	-	-	+(Mostly)	516	0.994	3	2	1	0.131835	0.104497	gi|225436658|ref|XP_002276327.1|	PREDICTED: pentatricopeptide repeat-containing protein At4g28010-like [Vitis vinifera]	gi|225436657|ref|XM_002276291.1|	PREDICTED: Vitis vinifera pentatricopeptide repeat-containing protein At4g28010-like (LOC100263764), mRNA	sp|Q9SUD8|PP340_ARATH	Pentatricopeptide repeat-containing protein At4g28010 OS=Arabidopsis thaliana GN=At4g28010 PE=2 SV=1	-	-	K15336	vvi:100259391	tRNA (cytosine38-C5)-methyltransferase [EC:2.1.1.204]	GO:0048451//petal formation;GO:0048453//sepal formation	-	GO:0005739//mitochondrion
406	CSE_Unigene15009	SW_CL2204_Contig3	-	-	+(Mostly)	888	0.988	11	3	8	0.840733	0.683484	gi|225436662|ref|XP_002276538.1|	PREDICTED: UPF0176 protein Pput_3956 [Vitis vinifera] >gi|296083867|emb|CBI24255.3| unnamed protein product [Vitis vinifera]	gi|359479310|ref|XM_002276502.2|	PREDICTED: Vitis vinifera uncharacterized LOC100244760 (LOC100244760), mRNA	sp|Q93WI0|STR12_ARATH	Rhodanese-like/PpiC domain-containing protein 12 OS=Arabidopsis thaliana GN=At5g19370 PE=2 SV=1	COG0607	Rhodanese-related sulfurtransferase	K09579	ppp:PHYPADRAFT_194479	peptidyl-prolyl cis-trans isomerase NIMA-interacting 4 [EC:5.2.1.8]	-	GO:0016853//isomerase activity	GO:0009507//chloroplast;GO:0005739//mitochondrion
407	CSE_Unigene1629	SW_Unigene1249	-	-	+(Mostly)	1218	0.989	14	9	5	0.20484	0.00400608	gi|296083931|emb|CBI24319.3|	unnamed protein product [Vitis vinifera]	gi|359479161|ref|XM_002268300.2|	PREDICTED: Vitis vinifera nucleolar complex protein 2 homolog-like (LOC100247894), mRNA	sp|Q9ZPV5|NOC2L_ARATH	Nucleolar complex protein 2 homolog OS=Arabidopsis thaliana GN=At2g18220 PE=2 SV=2	COG5604	Uncharacterized conserved protein	K14833	vvi:100247894	nucleolar complex protein 2	GO:0006979//response to oxidative stress;GO:0055114//oxidation-reduction process;GO:0042991//transcription factor import into nucleus;GO:0009220//pyrimidine ribonucleotide biosynthetic process	GO:0046872//metal ion binding;GO:0004601//peroxidase activity;GO:0020037//heme binding	GO:0005829//cytosol;GO:0005634//nucleus
408	CSE_Unigene601	SW_CL5140_Contig1	-	-	+(Mostly)	1173	0.99	12	4	8	0.962004	0.991222	gi|225436102|ref|XP_002278088.1|	PREDICTED: adipocyte plasma membrane-associated protein-like isoform 1 [Vitis vinifera]	gi|349716067|emb|FQ392074.1|	Vitis vinifera clone SS0AFA7YJ14	sp|P94111|STS1_ARATH	Strictosidine synthase 1 OS=Arabidopsis thaliana GN=SS1 PE=2 SV=2	COG3386	Gluconolactonase	K10754	gmx:100790070	replication factor C subunit 1	GO:0009821//alkaloid biosynthetic process	GO:0016844//strictosidine synthase activity	GO:0005886//plasma membrane;GO:0005774//vacuolar membrane;GO:0005576//extracellular region;GO:0009507//chloroplast;GO:0005783//endoplasmic reticulum
409	CSE_Unigene14692	SW_Unigene3982	-	-	+(Mostly)	927	0.997	3	2	1	0.169823	0.144682	gi|225438978|ref|XP_002284329.1|	PREDICTED: UPF0553 protein [Vitis vinifera] >gi|147768860|emb|CAN78136.1| hypothetical protein VITISV_034055 [Vitis vinifera]	gi|225438977|ref|XM_002284293.1|	PREDICTED: Vitis vinifera uncharacterized LOC100267891 (LOC100267891), mRNA	-	-	-	-	-	-	-	-	-	-
410	CSE_Unigene15601	SW_CL8467_Contig2	-	-	+(Mostly)	942	0.988	11	5	6	0.403714	0.119813	gi|225437219|ref|XP_002281875.1|	PREDICTED: putative uridine kinase C227.14 [Vitis vinifera] >gi|297735493|emb|CBI17933.3| unnamed protein product [Vitis vinifera]	gi|147770148|emb|AM451676.2|	Vitis vinifera contig VV78X194399.8, whole genome shotgun sequence	-	-	COG1072	Panthothenate kinase	-	-	-	GO:0006222//UMP biosynthetic process;GO:0016310//phosphorylation	GO:0004849//uridine kinase activity;GO:0016773//phosphotransferase activity, alcohol group as acceptor;GO:0005524//ATP binding	GO:0009507//chloroplast
411	CSE_Unigene13394	SW_CL7773_Contig2	-	-	+(Mostly)	960	0.991	9	4	5	0.3798	0.13761	gi|147777913|emb|CAN75726.1|	hypothetical protein VITISV_031406 [Vitis vinifera]	gi|225437265|ref|XM_002282413.1|	PREDICTED: Vitis vinifera iron-sulfur protein NUBPL-like (LOC100242483), mRNA	sp|Q9MBA2|MIND1_ARATH	Putative septum site-determining protein minD homolog, chloroplastic OS=Arabidopsis thaliana GN=MIND1 PE=1 SV=1	COG0489	ATPases involved in chromosome partitioning	K03593	vvi:100242483	ATP-binding protein involved in chromosome partitioning	-	GO:0005524//ATP binding;GO:0017111//nucleoside-triphosphatase activity	GO:0005739//mitochondrion
412	CSE_CL3213_Contig1	SW_CL3989_Contig2	-	-	+(Mostly)	822	0.998	2	1	1	0.316133	0.365889	gi|296085196|emb|CBI28691.3|	unnamed protein product [Vitis vinifera]	gi|359479679|ref|XM_002272612.2|	PREDICTED: Vitis vinifera ribosome-recycling factor, chloroplastic-like (LOC100263214), mRNA	sp|P82231|RRFC_SPIOL	Ribosome-recycling factor, chloroplastic OS=Spinacia oleracea GN=RRF PE=1 SV=1	COG0233	Ribosome recycling factor	K02838	vvi:100263214	ribosome recycling factor	GO:0006098//pentose-phosphate shunt;GO:0019288//isopentenyl diphosphate biosynthetic process, mevalonate-independent pathway;GO:0042742//defense response to bacterium;GO:0016226//iron-sulfur cluster assembly;GO:0009790//embryo development;GO:0009658//chloroplast organization;GO:0009817//defense response to fungus, incompatible interaction;GO:0032544//plastid translation;GO:0009073//aromatic amino…	GO:0005507//copper ion binding	GO:0009570//chloroplast stroma;GO:0009579//thylakoid
413	CSE_Unigene13131	SW_Unigene8460	-	-	+(Mostly)	522	1	0	NA	NA	NA	NA	gi|225437024|ref|XP_002278246.1|	PREDICTED: N-alpha-acetyltransferase 20 [Vitis vinifera] >gi|296085201|emb|CBI28696.3| unnamed protein product [Vitis vinifera]	gi|225437023|ref|XM_002278210.1|	PREDICTED: Vitis vinifera N-alpha-acetyltransferase 20-like (LOC100252851), mRNA	-	-	COG0456	Acetyltransferases	K00670	vvi:100252851	peptide alpha-N-acetyltransferase [EC:2.3.1.88]	GO:0006633//fatty acid biosynthetic process;GO:0002213//defense response to insect;GO:0001676//long-chain fatty acid metabolic process	GO:0004596//peptide alpha-N-acetyltransferase activity	-
414	CSE_Unigene9573	SW_Unigene24385	-	-	+(Mostly)	1116	0.992	9	5	4	0.319842	0.0833655	gi|359480419|ref|XP_003632456.1|	PREDICTED: GDSL esterase/lipase At2g23540-like isoform 1 [Vitis vinifera] >gi|297745686|emb|CBI40971.3| unnamed protein product [Vitis vinifera]	gi|359480418|ref|XM_003632408.1|	PREDICTED: Vitis vinifera GDSL esterase/lipase At2g23540-like, transcript variant 1 (LOC100855319), mRNA	sp|O80470|GDL38_ARATH	GDSL esterase/lipase At2g23540 OS=Arabidopsis thaliana GN=At2g23540 PE=2 SV=1	COG3240	Phospholipase/lecithinase/hemolysin	K01206	ath:AT1G67830	alpha-L-fucosidase [EC:3.2.1.51]	GO:0006629//lipid metabolic process	GO:0004091//carboxylesterase activity	GO:0005576//extracellular region;GO:0016023//cytoplasmic membrane-bounded vesicle
415	CSE_Unigene19116	SW_Unigene20191	-	-	+(Mostly)	1125	0.991	10	7	3	0.13357	0.00269829	gi|225436783|ref|XP_002268490.1|	PREDICTED: zinc finger protein CONSTANS-LIKE 13-like isoform 1 [Vitis vinifera]	gi|349719065|emb|FQ392590.1|	Vitis vinifera clone SS0AFA5YB03	sp|O82256|COL13_ARATH	Zinc finger protein CONSTANS-LIKE 13 OS=Arabidopsis thaliana GN=COL13 PE=2 SV=1	-	-	K12135	aly:ARALYDRAFT_488429	zinc finger protein CONSTANS	GO:0009805//coumarin biosynthetic process;GO:0006355//regulation of transcription, DNA-dependent;GO:0009611//response to wounding;GO:0009963//positive regulation of flavonoid biosynthetic process	-	GO:0043231//intracellular membrane-bounded organelle
416	CSE_Unigene15472	SW_Unigene10938	-	-	+(Mostly)	1584	0.996	7	4	3	0.241893	0.0654504	gi|225436831|ref|XP_002270535.1|	PREDICTED: U3 small nucleolar RNA-associated protein 15 homolog [Vitis vinifera]	gi|147777088|emb|AM456886.2|	Vitis vinifera contig VV78X038090.14, whole genome shotgun sequence	sp|Q9C827|COB22_ARATH	Coatomer subunit beta'-2 OS=Arabidopsis thaliana GN=At1g52360 PE=2 SV=1	COG2319	FOG: WD40 repeat	K14549	vvi:100264761	U3 small nucleolar RNA-associated protein 15	GO:0009560//embryo sac egg cell differentiation;GO:0000741//karyogamy;GO:0006364//rRNA processing	GO:0000166//nucleotide binding	GO:0005730//nucleolus;GO:0009536//plastid;GO:0080008//Cul4-RING ubiquitin ligase complex
417	CSE_Unigene18758	SW_Unigene18701	-	-	+(Mostly)	1581	0.992	13	5	8	0.530471	0.307342	gi|225436880|ref|XP_002273388.1|	PREDICTED: uncharacterized protein LOC100249461 [Vitis vinifera]	gi|359479786|ref|XM_002273352.2|	PREDICTED: Vitis vinifera uncharacterized LOC100249461 (LOC100249461), mRNA	-	-	-	-	K15032	ppp:PHYPADRAFT_161831	mTERF domain-containing protein, mitochondrial	GO:0009790//embryo development;GO:0008380//RNA splicing;GO:0042794//rRNA transcription from plastid promoter	-	GO:0009536//plastid;GO:0005739//mitochondrion
418	CSE_Unigene13197	SW_Unigene13378	-	-	+(Mostly)	546	0.998	1	NA	1	NA	NA	gi|296086682|emb|CBI32317.3|	unnamed protein product [Vitis vinifera]	gi|225436881|ref|XM_002273411.1|	PREDICTED: Vitis vinifera auxin-binding protein 1 (ABP1), mRNA	sp|P33490|ABP1_TOBAC	Auxin-binding protein T85 OS=Nicotiana tabacum GN=T85 PE=3 SV=1	-	-	-	-	-	GO:0032877//positive regulation of DNA endoreduplication;GO:0055114//oxidation-reduction process;GO:0000910//cytokinesis;GO:0045793//positive regulation of cell size;GO:0051781//positive regulation of cell division;GO:0009826//unidimensional cell growth	GO:0004872//receptor activity;GO:0010011//auxin binding;GO:0032440//2-alkenal reductase [NAD(P)] activity	GO:0005788//endoplasmic reticulum lumen
419	CSE_Unigene17268	SW_Unigene7350	-	-	+(Mostly)	1983	0.986	28	15	13	0.290372	0.00125362	gi|225436888|ref|XP_002273727.1|	PREDICTED: GPI transamidase component PIG-T-like isoform 2 [Vitis vinifera]	gi|225436885|ref|XM_002273660.1|	PREDICTED: Vitis vinifera GPI transamidase component PIG-T-like, transcript variant 1 (LOC100257996), mRNA	-	-	-	-	K05292	vvi:100257996	phosphatidylinositol glycan, class T	GO:0016255//attachment of GPI anchor to protein;GO:0042732//D-xylose metabolic process	GO:0003923//GPI-anchor transamidase activity	GO:0042765//GPI-anchor transamidase complex;GO:0009507//chloroplast
420	CSE_Unigene13969	SW_Unigene12917	-	-	+(Mostly)	1035	0.995	5	4	1	0.0857703	0.0160391	gi|225436896|ref|XP_002274008.1|	PREDICTED: mitochondrial ubiquitin ligase activator of nfkb 1 [Vitis vinifera] >gi|296086688|emb|CBI32323.3| unnamed protein product [Vitis vinifera]	gi|359479788|ref|XM_002273972.2|	PREDICTED: Vitis vinifera mitochondrial ubiquitin ligase activator of nfkb 1-like (LOC100247743), mRNA	-	-	-	-	K15688	vvi:100247743	E3 ubiquitin-protein ligase MUL1 [EC:6.3.2.19]	GO:0009658//chloroplast organization;GO:0045037//protein import into chloroplast stroma	GO:0008270//zinc ion binding;GO:0004842//ubiquitin-protein ligase activity	GO:0005739//mitochondrion;GO:0009941//chloroplast envelope
421	CSE_Unigene15199	SW_Unigene16440	-	-	+(Mostly)	1560	0.994	9	7	2	0.0930113	0.0012412	gi|225438811|ref|XP_002278393.1|	PREDICTED: UPF0481 protein At3g47200-like [Vitis vinifera]	gi|123716400|emb|AM454724.1|	Vitis vinifera contig VV78X229598.18, whole genome shotgun sequence	sp|Q9SD53|Y3720_ARATH	UPF0481 protein At3g47200 OS=Arabidopsis thaliana GN=At3g47200 PE=1 SV=1	-	-	-	-	-	-	-	GO:0005886//plasma membrane
422	CSE_CL3859_Contig1	SW_CL1411_Contig1	-	-	+(Mostly)	693	0.996	3	3	NA	0	NA	gi|225438758|ref|XP_002282881.1|	PREDICTED: F-box protein At5g67140 [Vitis vinifera] >gi|296082395|emb|CBI21400.3| unnamed protein product [Vitis vinifera]	gi|225438757|ref|XM_002282845.1|	PREDICTED: Vitis vinifera F-box protein At5g67140-like (LOC100266310), mRNA	sp|Q9FH99|FB302_ARATH	F-box protein At5g67140 OS=Arabidopsis thaliana GN=At5g67140 PE=2 SV=1	-	-	K14515	ath:AT2G25490	EIN3-binding F-box protein	-	GO:0016874//ligase activity	GO:0005737//cytoplasm
423	CSE_Unigene16679	SW_Unigene3869	-	-	+(Mostly)	618	0.987	8	6	2	0.122471	0.00643616	gi|225438635|ref|XP_002281281.1|	PREDICTED: probable FKBP-type peptidyl-prolyl cis-trans isomerase 4, chloroplastic [Vitis vinifera] >gi|296082462|emb|CBI21467.3| unnamed protein product [Vitis vinifera]	gi|359480696|ref|XM_002281245.2|	PREDICTED: Vitis vinifera probable FKBP-type peptidyl-prolyl cis-trans isomerase 4, chloroplastic-like (LOC100268058), mRNA	sp|Q9SCY3|FK162_ARATH	Peptidyl-prolyl cis-trans isomerase FKBP16-2, chloroplastic OS=Arabidopsis thaliana GN=FKBP16-2 PE=1 SV=1	COG0545	FKBP-type peptidyl-prolyl cis-trans isomerases 1	K01802	osa:4341766	peptidylprolyl isomerase [EC:5.2.1.8]	GO:0006457//protein folding;GO:0000413//protein peptidyl-prolyl isomerization	GO:0005528//FK506 binding;GO:0005515//protein binding;GO:0031679//NADH dehydrogenase (plastoquinone) activity;GO:0003755//peptidyl-prolyl cis-trans isomerase activity	GO:0010598//NAD(P)H dehydrogenase complex (plastoquinone);GO:0009543//chloroplast thylakoid lumen;GO:0005576//extracellular region;GO:0009535//chloroplast thylakoid membrane
424	CSE_Unigene16737	SW_Unigene15958	-	-	+(Mostly)	1104	0.998	2	2	NA	0	NA	gi|225438553|ref|XP_002279867.1|	PREDICTED: developmentally-regulated GTP-binding protein 1 [Vitis vinifera] >gi|296082507|emb|CBI21512.3| unnamed protein product [Vitis vinifera]	gi|225438552|ref|XM_002279831.1|	PREDICTED: Vitis vinifera developmentally-regulated GTP-binding protein 1-like (LOC100267907), mRNA	sp|Q9LQK0|DRG1_ARATH	Developmentally regulated G-protein 1 OS=Arabidopsis thaliana GN=DRG1 PE=1 SV=1	COG1163	Predicted GTPase	K06944	osa:4343980		GO:0006184//GTP catabolic process	GO:0019003//GDP binding;GO:0003924//GTPase activity;GO:0005525//GTP binding	GO:0005829//cytosol
425	CSE_Unigene15897	SW_Unigene12358	-	-	+(Mostly)	519	0.996	2	NA	2	NA	NA	gi|225438531|ref|XP_002279428.1|	PREDICTED: iron-sulfur assembly protein IscA, chloroplastic-like [Vitis vinifera]	gi|225438530|ref|XM_002279392.1|	PREDICTED: Vitis vinifera iron-sulfur assembly protein IscA, chloroplastic-like (LOC100249101), mRNA	sp|Q9XIK3|ISCAP_ARATH	Iron-sulfur assembly protein IscA, chloroplastic OS=Arabidopsis thaliana GN=ISCA PE=2 SV=2	COG0316	Uncharacterized conserved protein	K13628	vvi:100249101	iron-sulfur cluster assembly protein	GO:0042744//hydrogen peroxide catabolic process;GO:0016226//iron-sulfur cluster assembly	GO:0051536//iron-sulfur cluster binding;GO:0005198//structural molecule activity	GO:0009570//chloroplast stroma
426	CSE_Unigene657	SW_Unigene22901	-	-	+(Mostly)	942	0.989	10	4	6	0.451315	0.183862	gi|225438525|ref|XP_002275767.1|	PREDICTED: uncharacterized protein LOC100254208 [Vitis vinifera]	gi|225438524|ref|XM_002275731.1|	PREDICTED: Vitis vinifera uncharacterized LOC100254208 (LOC100254208), mRNA	-	-	COG0457	FOG: TPR repeat	-	-	-	-	-	GO:0009536//plastid
427	CSE_Unigene16627	SW_Unigene23657	-	-	+(Mostly)	693	0.993	5	4	1	0.0932569	0.0201624	gi|225438398|ref|XP_002274735.1|	PREDICTED: psbP domain-containing protein 2, chloroplastic [Vitis vinifera] >gi|296082589|emb|CBI21594.3| unnamed protein product [Vitis vinifera]	gi|225438397|ref|XM_002274699.1|	PREDICTED: Vitis vinifera psbP domain-containing protein 2, chloroplastic-like (LOC100245853), mRNA	sp|Q8VY52|PPD2_ARATH	PsbP domain-containing protein 2, chloroplastic OS=Arabidopsis thaliana GN=PPD2 PE=1 SV=1	-	-	K02717	gmx:100305918	photosystem II oxygen-evolving enhancer protein 2	GO:0009965//leaf morphogenesis;GO:0030154//cell differentiation;GO:0015979//photosynthesis;GO:0045893//positive regulation of transcription, DNA-dependent	GO:0005509//calcium ion binding	GO:0019898//extrinsic to membrane;GO:0009507//chloroplast;GO:0009654//oxygen evolving complex
428	CSE_Unigene10806	SW_Unigene22509	-	-	+(Mostly)	1794	0.993	12	8	4	0.133489	0.000867171	gi|147807580|emb|CAN77670.1|	hypothetical protein VITISV_024978 [Vitis vinifera]	gi|123708092|emb|AM484471.1|	Vitis vinifera contig VV78X101095.5, whole genome shotgun sequence	sp|Q8RWD6|FB271_ARATH	F-box protein At5g39450 OS=Arabidopsis thaliana GN=At5g39450 PE=2 SV=1	-	-	-	-	-	GO:0055114//oxidation-reduction process;GO:0030328//prenylcysteine catabolic process	GO:0016670//oxidoreductase activity, acting on a sulfur group of donors, oxygen as acceptor	-
429	CSE_Unigene15394	SW_Unigene7497	-	-	+(Mostly)	1629	0.994	9	5	4	0.276677	0.0550069	gi|359480765|ref|XP_002273522.2|	PREDICTED: NADH dehydrogenase C1, chloroplastic/mitochondrial-like [Vitis vinifera]	gi|359480764|ref|XM_002273486.2|	PREDICTED: Vitis vinifera NADH dehydrogenase C1, chloroplastic/mitochondrial-like (LOC100264660), mRNA	sp|Q8GXR9|DHNA_ARATH	NADH dehydrogenase C1, chloroplastic/mitochondrial OS=Arabidopsis thaliana GN=NDC1 PE=1 SV=2	COG1252	NADH dehydrogenase, FAD-containing subunit	K03885	sbi:SORBI_10g007230	NADH dehydrogenase [EC:1.6.99.3]	GO:0071482//cellular response to light stimulus;GO:0042744//hydrogen peroxide catabolic process;GO:0055114//oxidation-reduction process	GO:0050660//flavin adenine dinucleotide binding;GO:0003954//NADH dehydrogenase activity	GO:0005618//cell wall;GO:0031304//intrinsic to mitochondrial inner membrane;GO:0009534//chloroplast thylakoid;GO:0010287//plastoglobule
430	CSE_Unigene12475	SW_Unigene11362	-	-	+(Mostly)	672	0.997	2	2	NA	0	NA	gi|225438323|ref|XP_002273073.1|	PREDICTED: E3 ubiquitin-protein ligase HERC2 [Vitis vinifera] >gi|296082630|emb|CBI21635.3| unnamed protein product [Vitis vinifera]	gi|225438322|ref|XM_002273037.1|	PREDICTED: Vitis vinifera E3 ubiquitin-protein ligase HERC2-like (LOC100259340), mRNA	sp|Q9FN03|UVR8_ARATH	Ultraviolet-B receptor UVR8 OS=Arabidopsis thaliana GN=UVR8 PE=1 SV=1	COG5184	Alpha-tubulin suppressor and related RCC1 domain-containing proteins	K11493	ota:Ot03g05690	regulator of chromosome condensation	-	GO:0003682//chromatin binding;GO:0008536//Ran GTPase binding	-
431	CSE_Unigene15027	SW_Unigene944	-	-	+(Mostly)	1569	0.995	8	7	1	0.0519027	0.000576616	gi|359480786|ref|XP_002271927.2|	PREDICTED: ferrochelatase-2, chloroplastic-like [Vitis vinifera]	gi|359480785|ref|XM_002271891.2|	PREDICTED: Vitis vinifera ferrochelatase-2, chloroplastic-like (LOC100254236), mRNA	sp|A2Y3Q5|HEMH_ORYSI	Ferrochelatase-2, chloroplastic OS=Oryza sativa subsp. indica GN=HEMH PE=2 SV=2	COG0276	Protoheme ferro-lyase (ferrochelatase)	K01772	vvi:100254236	ferrochelatase [EC:4.99.1.1]	GO:0006783//heme biosynthetic process	GO:0004325//ferrochelatase activity	GO:0009507//chloroplast
432	CSE_Unigene18681	SW_Unigene15259	-	-	+(Mostly)	1437	0.989	15	6	9	0.381854	0.0657233	gi|359479954|ref|XP_002263128.2|	PREDICTED: c-1-tetrahydrofolate synthase, cytoplasmic [Vitis vinifera]	gi|359479953|ref|XM_002263092.2|	PREDICTED: Vitis vinifera c-1-tetrahydrofolate synthase, cytoplasmic-like (LOC100255621), mRNA	-	-	COG0190	5,10-methylene-tetrahydrofolate dehydrogenase/Methenyl tetrahydrofolate cyclohydrolase	-	-	-	GO:0055114//oxidation-reduction process;GO:0030244//cellulose biosynthetic process;GO:0009396//folic acid-containing compound biosynthetic process;GO:0048193//Golgi vesicle transport;GO:0019344//cysteine biosynthetic process	GO:0004488//methylenetetrahydrofolate dehydrogenase (NADP+) activity;GO:0004477//methenyltetrahydrofolate cyclohydrolase activity;GO:0000166//nucleotide binding	GO:0005829//cytosol;GO:0009507//chloroplast
433	CSE_Unigene14550	SW_Unigene13161	-	-	+(Mostly)	975	0.995	5	5	NA	0	NA	gi|225437370|ref|XP_002269158.1|	PREDICTED: peter Pan-like protein [Vitis vinifera] >gi|297743890|emb|CBI36860.3| unnamed protein product [Vitis vinifera]	gi|359480339|ref|XM_002269122.2|	PREDICTED: Vitis vinifera peter Pan-like protein (LOC100252111), mRNA	sp|Q9ASU7|PPAN_ARATH	Peter Pan-like protein OS=Arabidopsis thaliana GN=PPAN PE=1 SV=1	-	-	K14859	vvi:100252111	ribosome biogenesis protein SSF1/2	-	-	GO:0005634//nucleus
434	CSE_Unigene16364	SW_Unigene14043	-	-	+(Mostly)	723	0.997	2	1	1	0.330653	0.374435	gi|225437410|ref|XP_002270967.1|	PREDICTED: U1 small nuclear ribonucleoprotein A [Vitis vinifera]	gi|359479940|ref|XM_002270931.2|	PREDICTED: Vitis vinifera U1 small nuclear ribonucleoprotein A-like (LOC100243572), mRNA	sp|Q39244|RU1A_ARATH	U1 small nuclear ribonucleoprotein A OS=Arabidopsis thaliana GN=U1A PE=1 SV=1	-	-	K11094	aly:ARALYDRAFT_320780	U2 small nuclear ribonucleoprotein B''	GO:0000398//mRNA splicing, via spliceosome;GO:0009651//response to salt stress	GO:0017069//snRNA binding;GO:0000166//nucleotide binding	GO:0005730//nucleolus;GO:0005685//U1 snRNP;GO:0005681//spliceosomal complex;GO:0005829//cytosol
435	CSE_Unigene12857	SW_Unigene12911	-	-	+(Mostly)	945	0.998	2	2	NA	0	NA	gi|225437465|ref|XP_002273574.1|	PREDICTED: mitochondrial nicotinamide adenine dinucleotide transporter 1 isoform 1 [Vitis vinifera] >gi|297743935|emb|CBI36905.3| unnamed protein product [Vitis vinifera]	gi|359480086|ref|XM_002273538.2|	PREDICTED: Vitis vinifera mitochondrial nicotinamide adenine dinucleotide transporter 1-like, transcript variant 1 (LOC100258843), mRNA	sp|O22261|NDT1_ARATH	Nicotinamide adenine dinucleotide transporter 1, chloroplastic OS=Arabidopsis thaliana GN=NDT1 PE=1 SV=2	-	-	K15115	vvi:100258843	solute carrier family 25 (mitochondrial folate transporter), member 32	GO:0055085//transmembrane transport;GO:0043132//NAD transport;GO:0006839//mitochondrial transport	GO:0051724//NAD transporter activity	GO:0005743//mitochondrial inner membrane;GO:0031969//chloroplast membrane;GO:0016021//integral to membrane
436	CSE_Unigene9333	SW_Unigene23550	-	-	+(Mostly)	1545	0.971	45	8	37	1.65848	0.230021	gi|359479947|ref|XP_002270567.2|	PREDICTED: uncharacterized protein LOC100260535 [Vitis vinifera]	gi|359479946|ref|XM_002270531.2|	PREDICTED: Vitis vinifera uncharacterized LOC100260535 (LOC100260535), mRNA	-	-	-	-	-	-	-	-	-	-
437	CSE_Unigene989	SW_Unigene22188	-	-	+(Mostly)	2325	0.991	16	8	8	0.280842	0.0125856	gi|147821303|emb|CAN74586.1|	hypothetical protein VITISV_041989 [Vitis vinifera]	gi|225437590|ref|XM_002277383.1|	PREDICTED: Vitis vinifera DEAD-box ATP-dependent RNA helicase 24-like (LOC100241725), mRNA	sp|O22907|RH24_ARATH	DEAD-box ATP-dependent RNA helicase 24 OS=Arabidopsis thaliana GN=RH24 PE=1 SV=2	COG0513	Superfamily II DNA and RNA helicases	K12835	vvi:100241725	ATP-dependent RNA helicase DDX42 [EC:3.6.4.13]	-	GO:0008026//ATP-dependent helicase activity;GO:0003723//RNA binding;GO:0005524//ATP binding	GO:0005634//nucleus;GO:0005739//mitochondrion
438	CSE_Unigene17549	SW_Unigene12546	-	-	+(Mostly)	591	0.99	6	4	2	0.166273	0.0378324	gi|225437667|ref|XP_002279289.1|	PREDICTED: nitrogen regulatory protein P-II homolog [Vitis vinifera] >gi|297744028|emb|CBI36998.3| unnamed protein product [Vitis vinifera]	gi|349730665|emb|FQ389073.1|	Vitis vinifera clone SS0AEB20YO19	sp|Q9ZST4|GLNB_ARATH	Nitrogen regulatory protein P-II homolog OS=Arabidopsis thaliana GN=GLB1 PE=1 SV=1	COG0347	Nitrogen regulatory protein PII	-	-	-	GO:0044272//sulfur compound biosynthetic process;GO:0009108//coenzyme biosynthetic process;GO:0009695//jasmonic acid biosynthetic process;GO:2000013//regulation of arginine biosynthetic process via ornithine;GO:0009749//response to glucose stimulus;GO:0009072//aromatic amino acid family metabolic process;GO:0006808//regulation of nitrogen utilization;GO:0009651//response to salt stress;GO:0009416…	GO:0005344//oxygen transporter activity;GO:0000287//magnesium ion binding;GO:0005515//protein binding;GO:0010307//acetylglutamate kinase regulator activity;GO:0005524//ATP binding;GO:0019825//oxygen binding	GO:0005829//cytosol;GO:0009506//plasmodesma;GO:0005618//cell wall;GO:0005886//plasma membrane;GO:0009534//chloroplast thylakoid
439	CSE_Unigene16336	SW_Unigene14975	-	-	+(Mostly)	1644	0.992	10	6	4	0.246159	0.029116	gi|225437762|ref|XP_002273793.1|	PREDICTED: protoporphyrinogen oxidase, chloroplastic [Vitis vinifera] >gi|297744080|emb|CBI37050.3| unnamed protein product [Vitis vinifera]	gi|359480233|ref|XM_002273757.2|	PREDICTED: Vitis vinifera protoporphyrinogen oxidase, chloroplastic-like (LOC100243415), mRNA	sp|P55826|PPOC_ARATH	Protoporphyrinogen oxidase, chloroplastic OS=Arabidopsis thaliana GN=PPOX PE=2 SV=1	COG1232	Protoporphyrinogen oxidase	K00231	vvi:100243415	oxygen-dependent protoporphyrinogen oxidase [EC:1.3.3.4]	GO:0055114//oxidation-reduction process;GO:0006779//porphyrin-containing compound biosynthetic process;GO:0008615//pyridoxine biosynthetic process;GO:0019761//glucosinolate biosynthetic process;GO:0042817//pyridoxal metabolic process	GO:0004729//oxygen-dependent protoporphyrinogen oxidase activity;GO:0004733//pyridoxamine-phosphate oxidase activity;GO:0010181//FMN binding	GO:0005829//cytosol;GO:0009941//chloroplast envelope;GO:0009534//chloroplast thylakoid;GO:0005576//extracellular region
440	CSE_Unigene18229	SW_Unigene12295	-	-	+(Mostly)	2985	0.995	15	8	7	0.25383	0.00915608	gi|297744119|emb|CBI37089.3|	unnamed protein product [Vitis vinifera]	gi|359480256|ref|XM_003632374.1|	PREDICTED: Vitis vinifera poly [ADP-ribose] polymerase 1-like, transcript variant 2 (LOC100261796), mRNA	sp|Q9ZP54|PARP1_ARATH	Poly [ADP-ribose] polymerase 1 OS=Arabidopsis thaliana GN=PARP1 PE=1 SV=2	-	-	K10798	vvi:100261796	poly [ADP-ribose] polymerase [EC:2.4.2.30]	GO:0010267//production of ta-siRNAs involved in RNA interference;GO:0006346//methylation-dependent chromatin silencing;GO:0000911//cytokinesis by cell plate formation;GO:0006471//protein ADP-ribosylation;GO:0043687//post-translational protein modification;GO:0006261//DNA-dependent DNA replication;GO:0006306//DNA methylation;GO:0009616//virus induced gene silencing;GO:0048449//floral organ formati…	GO:0051287//NAD binding;GO:0003950//NAD+ ADP-ribosyltransferase activity;GO:0008270//zinc ion binding;GO:0003677//DNA binding;GO:0032440//2-alkenal reductase [NAD(P)] activity	GO:0005634//nucleus
441	CSE_Unigene11771	SW_Unigene3884	-	-	+(Mostly)	1926	0.993	14	7	7	0.40654	0.125998	gi|225437850|ref|XP_002263867.1|	PREDICTED: nephrocystin-3 [Vitis vinifera]	gi|225437849|ref|XM_002263831.1|	PREDICTED: Vitis vinifera nephrocystin-3-like (LOC100247992), mRNA	-	-	COG0457	FOG: TPR repeat	-	-	-	GO:0034976//response to endoplasmic reticulum stress;GO:0006457//protein folding;GO:0009220//pyrimidine ribonucleotide biosynthetic process;GO:0009408//response to heat;GO:0009644//response to high light intensity;GO:0042542//response to hydrogen peroxide	-	GO:0005739//mitochondrion;GO:0009507//chloroplast
442	CSE_Unigene13120	SW_Unigene22950	-	-	+(Mostly)	1020	0.997	3	3	NA	0	NA	gi|225438103|ref|XP_002277616.1|	PREDICTED: probable arabinose 5-phosphate isomerase [Vitis vinifera]	gi|359480287|ref|XM_002277580.2|	PREDICTED: Vitis vinifera probable arabinose 5-phosphate isomerase-like (LOC100249789), mRNA	sp|Q9M1T1|SETH3_ARATH	Probable arabinose 5-phosphate isomerase OS=Arabidopsis thaliana GN=SETH3 PE=2 SV=1	COG0794	Predicted sugar phosphate isomerase involved in capsule formation	K06041	vvi:100249789	arabinose-5-phosphate isomerase [EC:5.3.1.13]	GO:0005975//carbohydrate metabolic process;GO:0019243//methylglyoxal catabolic process to D-lactate	GO:0019146//arabinose-5-phosphate isomerase activity;GO:0030246//carbohydrate binding	-
443	CSE_Unigene12714	SW_Unigene2830	-	-	+(Mostly)	1200	0.988	15	8	7	0.312308	0.024122	gi|225438027|ref|XP_002271402.1|	PREDICTED: protein BREAST CANCER SUSCEPTIBILITY 1 homolog [Vitis vinifera]	gi|225438026|ref|XM_002271366.1|	PREDICTED: Vitis vinifera protein BREAST CANCER SUSCEPTIBILITY 1 homolog (LOC100253255), mRNA	sp|Q8RXD4|BRCA1_ARATH	Protein BREAST CANCER SUSCEPTIBILITY 1 homolog OS=Arabidopsis thaliana GN=BRCA1 PE=2 SV=1	-	-	K10683	vvi:100253255	BRCA1-associated RING domain protein 1 [EC:6.3.2.19]	GO:0000278//mitotic cell cycle;GO:0051726//regulation of cell cycle;GO:0006261//DNA-dependent DNA replication;GO:0009965//leaf morphogenesis;GO:0000724//double-strand break repair via homologous recombination;GO:0016444//somatic cell DNA recombination;GO:0051567//histone H3-K9 methylation;GO:0031047//gene silencing by RNA;GO:0009555//pollen development;GO:0009934//regulation of meristem structura…	GO:0003677//DNA binding	GO:0005622//intracellular
444	CSE_CL6683_Contig2	SW_CL5276_Contig1	-	-	+(Mostly)	1092	0.998	2	2	NA	0	NA	gi|225437945|ref|XP_002269637.1|	PREDICTED: tetratricopeptide repeat protein 4 homolog [Vitis vinifera] >gi|297744240|emb|CBI37210.3| unnamed protein product [Vitis vinifera]	gi|359480326|ref|XM_002269601.2|	PREDICTED: Vitis vinifera tetratricopeptide repeat protein 4 homolog-like (LOC100253278), mRNA	sp|Q9SUT5|SGT1B_ARATH	Protein SGT1 homolog B OS=Arabidopsis thaliana GN=SGT1B PE=1 SV=1	COG0457	FOG: TPR repeat	K09553	osa:4330134	stress-induced-phosphoprotein 1	GO:0006950//response to stress	GO:0051879//Hsp90 protein binding	GO:0005737//cytoplasm
445	CSE_Unigene13740	SW_Unigene21832	-	-	+(Mostly)	834	0.993	3	1	2	0.668754	0.56427	gi|225465451|ref|XP_002266369.1|	PREDICTED: PPPDE peptidase domain-containing protein 2-like isoform 2 [Vitis vinifera] >gi|225465453|ref|XP_002266333.1| PREDICTED: PPPDE peptidase domain-containing protein 2-like isoform 1 [Vitis vinifera]	gi|359479888|ref|XM_002266333.2|	PREDICTED: Vitis vinifera PPPDE peptidase domain-containing protein 2-like, transcript variant 2 (LOC100249956), mRNA	sp|Q93VG8|PPDEX_ARATH	DeSI-like protein At4g17486 OS=Arabidopsis thaliana GN=At4g17486 PE=2 SV=1	-	-	-	-	-	-	-	GO:0005634//nucleus;GO:0005737//cytoplasm
446	CSE_CL3787_Contig1	SW_Unigene12302	-	-	+(Mostly)	1479	0.996	6	4	2	0.160556	0.0341252	gi|359480144|ref|XP_002269420.2|	PREDICTED: pentatricopeptide repeat-containing protein At5g48730, chloroplastic-like [Vitis vinifera] >gi|297744374|emb|CBI37344.3| unnamed protein product [Vitis vinifera]	gi|359480143|ref|XM_002269384.2|	PREDICTED: Vitis vinifera pentatricopeptide repeat-containing protein At5g48730, chloroplastic-like (LOC100241357), mRNA	sp|Q9FKC3|PP424_ARATH	Pentatricopeptide repeat-containing protein At5g48730, chloroplastic OS=Arabidopsis thaliana GN=At5g48730 PE=2 SV=2	-	-	K15336	vvi:100259391	tRNA (cytosine38-C5)-methyltransferase [EC:2.1.1.204]	-	-	GO:0009536//plastid
447	CSE_Unigene17690	SW_CL2087_Contig1	-	-	+(Mostly)	1827	0.993	13	4	9	0.953138	0.990069	gi|225463870|ref|XP_002268712.1|	PREDICTED: GPI transamidase component PIG-S-like [Vitis vinifera]	gi|359480363|ref|XM_002268676.2|	PREDICTED: Vitis vinifera GPI transamidase component PIG-S-like (LOC100262163), mRNA	-	-	-	-	K05291	vvi:100262163	phosphatidylinositol glycan, class S	-	-	GO:0005774//vacuolar membrane;GO:0005783//endoplasmic reticulum;GO:0005634//nucleus
448	CSE_CL6867_Contig2	SW_Unigene13203	-	-	+(Mostly)	801	0.993	6	3	3	0.3423	0.178874	gi|359481083|ref|XP_002265170.2|	PREDICTED: uncharacterized protein LOC100246079 [Vitis vinifera] >gi|296089289|emb|CBI39061.3| unnamed protein product [Vitis vinifera]	gi|359481082|ref|XM_002265134.2|	PREDICTED: Vitis vinifera uncharacterized LOC100246079 (LOC100246079), mRNA	-	-	-	-	K13091	gmx:100789839	RNA-binding protein 39	-	GO:0003676//nucleic acid binding;GO:0000166//nucleotide binding	-
449	CSE_Unigene14774	SW_Unigene16399	-	-	+(Mostly)	678	0.994	4	1	3	1.26774	0.748738	gi|359481089|ref|XP_002265324.2|	PREDICTED: N(6)-adenine-specific DNA methyltransferase 2-like [Vitis vinifera]	gi|359481088|ref|XM_002265288.2|	PREDICTED: Vitis vinifera N(6)-adenine-specific DNA methyltransferase 2-like (LOC100252975), mRNA	-	-	-	-	-	-	-	GO:0032259//methylation	GO:0003676//nucleic acid binding;GO:0008168//methyltransferase activity	GO:0005737//cytoplasm
450	CSE_Unigene1176	SW_Unigene14800	-	-	+(Mostly)	2730	0.996	12	8	4	0.178756	0.00403988	gi|225439315|ref|XP_002267321.1|	PREDICTED: D-lactate dehydrogenase [cytochrome], mitochondrial [Vitis vinifera] >gi|296089322|emb|CBI39094.3| unnamed protein product [Vitis vinifera]	gi|359481114|ref|XM_002267285.2|	PREDICTED: Vitis vinifera D-lactate dehydrogenase [cytochrome], mitochondrial-like (LOC100242784), mRNA	sp|Q94AX4|DLD_ARATH	D-lactate dehydrogenase [cytochrome], mitochondrial OS=Arabidopsis thaliana GN=DLD PE=1 SV=1	COG0277	FAD/FMN-containing dehydrogenases	K00102	vvi:100242784	D-lactate dehydrogenase (cytochrome) [EC:1.1.2.4]	GO:0051596//methylglyoxal catabolic process;GO:0055114//oxidation-reduction process	GO:0042802//identical protein binding;GO:0050660//flavin adenine dinucleotide binding;GO:0008891//glycolate oxidase activity;GO:0008762//UDP-N-acetylmuramate dehydrogenase activity;GO:0004458//D-lactate dehydrogenase (cytochrome) activity;GO:0005524//ATP binding;GO:0019154//glycolate dehydrogenase activity	GO:0005739//mitochondrion
451	CSE_Unigene710	SW_Unigene22844	-	-	+(Mostly)	2232	0.974	28	14	14	0.404373	0.0198259	gi|225439751|ref|XP_002273172.1|	PREDICTED: pentatricopeptide repeat-containing protein At3g09650, chloroplastic-like [Vitis vinifera]	gi|359481359|ref|XM_002273136.2|	PREDICTED: Vitis vinifera pentatricopeptide repeat-containing protein At3g09650, chloroplastic-like (LOC100248209), mRNA	sp|Q9SF38|PP222_ARATH	Pentatricopeptide repeat-containing protein At3g09650, chloroplastic OS=Arabidopsis thaliana GN=HCF152 PE=2 SV=1	-	-	K15336	vvi:100259391	tRNA (cytosine38-C5)-methyltransferase [EC:2.1.1.204]	GO:0006397//mRNA processing;GO:0019252//starch biosynthetic process;GO:0000023//maltose metabolic process	GO:0003729//mRNA binding	GO:0009570//chloroplast stroma;GO:0005739//mitochondrion
452	CSE_Unigene15626	SW_Unigene16304	-	-	+(Mostly)	993	0.993	7	4	3	0.295696	0.105878	gi|225444515|ref|XP_002274769.1|	PREDICTED: peroxidase 42 isoform 1 [Vitis vinifera] >gi|147768417|emb|CAN60224.1| hypothetical protein VITISV_039918 [Vitis vinifera]	gi|225444514|ref|XM_002274733.1|	PREDICTED: Vitis vinifera peroxidase 42-like, transcript variant 1 (LOC100241814), mRNA	sp|Q9SB81|PER42_ARATH	Peroxidase 42 OS=Arabidopsis thaliana GN=PER42 PE=1 SV=2	-	-	K00430	vvi:100241814	peroxidase [EC:1.11.1.7]	GO:0055114//oxidation-reduction process;GO:0006979//response to oxidative stress	GO:0020037//heme binding;GO:0046872//metal ion binding;GO:0004601//peroxidase activity	-
453	CSE_Unigene15089	SW_Unigene19216	-	-	+(Mostly)	1392	0.997	4	3	1	0.103017	0.0405321	gi|225439936|ref|XP_002280406.1|	PREDICTED: dnaJ homolog subfamily C member 3 homolog [Vitis vinifera] >gi|297741582|emb|CBI32714.3| unnamed protein product [Vitis vinifera]	gi|225439935|ref|XM_002280370.1|	PREDICTED: Vitis vinifera dnaJ homolog subfamily C member 3 homolog-like (LOC100265482), mRNA	sp|P42825|DNAJ2_ARATH	Chaperone protein dnaJ 2 OS=Arabidopsis thaliana GN=ATJ2 PE=1 SV=2	COG0484	DnaJ-class molecular chaperone with C-terminal Zn finger domain	K09523	pop:POPTR_576677	DnaJ homolog subfamily C member 3	GO:0006457//protein folding;GO:0009644//response to high light intensity;GO:0034976//response to endoplasmic reticulum stress;GO:0042542//response to hydrogen peroxide;GO:0009408//response to heat	GO:0031072//heat shock protein binding	GO:0005788//endoplasmic reticulum lumen;GO:0016023//cytoplasmic membrane-bounded vesicle;GO:0005886//plasma membrane
454	CSE_Unigene13493	SW_Unigene23069	-	-	+(Mostly)	2061	0.993	15	10	5	0.168085	0.00086773	gi|225440005|ref|XP_002276355.1|	PREDICTED: pentatricopeptide repeat-containing protein At2g37230 [Vitis vinifera]	gi|147863870|emb|AM472005.2|	Vitis vinifera contig VV78X048855.4, whole genome shotgun sequence	sp|Q9ZUU3|PP190_ARATH	Pentatricopeptide repeat-containing protein At2g37230 OS=Arabidopsis thaliana GN=At2g37230 PE=2 SV=1	-	-	K15336	vvi:100259391	tRNA (cytosine38-C5)-methyltransferase [EC:2.1.1.204]	-	-	GO:0009535//chloroplast thylakoid membrane;GO:0005739//mitochondrion
455	CSE_Unigene1844	SW_Unigene6114	-	-	+(Mostly)	6459	0.996	26	21	5	0.0993854	9.50601e-08	gi|297741628|emb|CBI32760.3|	unnamed protein product [Vitis vinifera]	gi|359481390|ref|XM_002276674.2|	PREDICTED: Vitis vinifera RNA polymerase sigma factor rpoD-like (LOC100267110), mRNA	sp|Q9LD95|SIGF_ARATH	RNA polymerase sigma factor sigF, chloroplastic OS=Arabidopsis thaliana GN=SIGF PE=1 SV=1	COG0568	DNA-directed RNA polymerase, sigma subunit (sigma70/sigma32)	K03086	ota:Ot06g01190	RNA polymerase primary sigma factor	GO:0016117//carotenoid biosynthetic process;GO:0019288//isopentenyl diphosphate biosynthetic process, mevalonate-independent pathway;GO:0006352//DNA-dependent transcription, initiation;GO:0009902//chloroplast relocation;GO:0090351//seedling development;GO:0009965//leaf morphogenesis;GO:0034660//ncRNA metabolic process;GO:0030154//cell differentiation;GO:0045893//positive regulation of transcripti…	GO:0003899//DNA-directed RNA polymerase activity;GO:0005515//protein binding;GO:0001053//plastid sigma factor activity;GO:0003677//DNA binding;GO:0003700//sequence-specific DNA binding transcription factor activity	GO:0009507//chloroplast;GO:0005634//nucleus
456	CSE_Unigene16610	SW_Unigene6575	-	-	+(Mostly)	2652	0.996	10	10	NA	0	NA	gi|225440123|ref|XP_002277489.1|	PREDICTED: putative SWI/SNF-related matrix-associated actin-dependent regulator of chromatin subfamily A member 3-like 1-like [Vitis vinifera]	gi|147795705|emb|AM449245.2|	Vitis vinifera contig VV78X170167.3, whole genome shotgun sequence	sp|Q9M1I1|FB304_ARATH	F-box protein At3g54460 OS=Arabidopsis thaliana GN=At3g54460 PE=2 SV=1	COG0553	Superfamily II DNA/RNA helicases, SNF2 family	K15711	vvi:100263696	SWI/SNF-related matrix-associated actin-dependent regulator of chromatin subfamily A3 [EC:3.6.4.- 6.3.2.19]	GO:0045132//meiotic chromosome segregation;GO:0006259//DNA metabolic process;GO:0033044//regulation of chromosome organization;GO:0007062//sister chromatid cohesion;GO:0031048//chromatin silencing by small RNA	GO:0008270//zinc ion binding;GO:0003677//DNA binding;GO:0005524//ATP binding;GO:0004386//helicase activity	GO:0005634//nucleus
457	CSE_Unigene10947	SW_Unigene5865	-	-	+(Mostly)	789	0.985	9	6.97987	2.02013	0.108129	0.002379	gi|225440155|ref|XP_002283307.1|	PREDICTED: psbP domain-containing protein 6, chloroplastic [Vitis vinifera] >gi|297741687|emb|CBI32819.3| unnamed protein product [Vitis vinifera]	gi|225440154|ref|XM_002283271.1|	PREDICTED: Vitis vinifera psbP domain-containing protein 6, chloroplastic-like (LOC100246497), mRNA	sp|Q9LXX5|PPD6_ARATH	PsbP domain-containing protein 6, chloroplastic OS=Arabidopsis thaliana GN=PPD6 PE=1 SV=1	-	-	K02717	ath:AT2G30790	photosystem II oxygen-evolving enhancer protein 2	GO:0009965//leaf morphogenesis;GO:0010027//thylakoid membrane organization;GO:0030154//cell differentiation;GO:0015979//photosynthesis	GO:0005509//calcium ion binding;GO:0005515//protein binding	GO:0019898//extrinsic to membrane;GO:0009570//chloroplast stroma;GO:0009654//oxygen evolving complex;GO:0009543//chloroplast thylakoid lumen
458	CSE_Unigene13755	SW_Unigene12258	-	-	+(Mostly)	705	0.989	5	1	4	1.29612	0.754179	gi|225440240|ref|XP_002283874.1|	PREDICTED: probable aquaporin SIP2-1 [Vitis vinifera] >gi|297741728|emb|CBI32860.3| unnamed protein product [Vitis vinifera]	gi|225440239|ref|XM_002283838.1|	PREDICTED: Vitis vinifera probable aquaporin SIP2-1-like (LOC100246584), mRNA	sp|Q9M1K3|SIP21_ARATH	Probable aquaporin SIP2-1 OS=Arabidopsis thaliana GN=SIP2-1 PE=2 SV=1	-	-	K09875	aly:ARALYDRAFT_907149	aquaporin SIP	GO:0006810//transport;GO:0046685//response to arsenic-containing substance	GO:0005215//transporter activity	GO:0016021//integral to membrane;GO:0005783//endoplasmic reticulum;GO:0005886//plasma membrane
459	CSE_Unigene15737	SW_Unigene8329	-	-	+(Mostly)	1209	0.994	7	4	3	0.243539	0.0669525	gi|225440242|ref|XP_002283892.1|	PREDICTED: magnesium-protoporphyrin IX monomethyl ester [oxidative] cyclase, chloroplastic [Vitis vinifera] >gi|147844779|emb|CAN79041.1| hypothetical protein VITISV_043754 [Vitis vinifera]	gi|225440241|ref|XM_002283856.1|	PREDICTED: Vitis vinifera magnesium-protoporphyrin IX monomethyl ester [oxidative] cyclase, chloroplastic-like (LOC100241461), mRNA	sp|Q6SJV8|CRD1_GOSHI	Magnesium-protoporphyrin IX monomethyl ester [oxidative] cyclase, chloroplastic OS=Gossypium hirsutum GN=CRD1 PE=2 SV=2	-	-	K04035	vvi:100241461	magnesium-protoporphyrin IX monomethyl ester (oxidative) cyclase [EC:1.14.13.81]	GO:0036068;GO:0006636//unsaturated fatty acid biosynthetic process;GO:0010207//photosystem II assembly;GO:0019288//isopentenyl diphosphate biosynthetic process, mevalonate-independent pathway;GO:0019216//regulation of lipid metabolic process;GO:0009416//response to light stimulus;GO:0019344//cysteine biosynthetic process;GO:0055114//oxidation-reduction process;GO:0006364//rRNA processing;GO:00100…	GO:0005506//iron ion binding;GO:0003677//DNA binding;GO:0048529//magnesium-protoporphyrin IX monomethyl ester (oxidative) cyclase activity	GO:0009706//chloroplast inner membrane;GO:0009535//chloroplast thylakoid membrane
460	CSE_CL5441_Contig2	SW_CL3654_Contig2	-	-	+(Mostly)	570	1	0	NA	NA	NA	NA	gi|147807423|emb|CAN70759.1|	hypothetical protein VITISV_012852 [Vitis vinifera]	gi|359481477|ref|XM_002265223.2|	PREDICTED: Vitis vinifera protein PLANT CADMIUM RESISTANCE 10-like, transcript variant 1 (LOC100264543), mRNA	sp|Q8S8T8|PCR10_ARATH	Protein PLANT CADMIUM RESISTANCE 10 OS=Arabidopsis thaliana GN=PCR10 PE=2 SV=1	-	-	-	-	-	GO:0006661//phosphatidylinositol biosynthetic process	-	GO:0005886//plasma membrane
461	CSE_Unigene1899	SW_Unigene19626	-	-	+(Mostly)	1344	0.991	12	8	4	0.137988	0.00108646	gi|147857564|emb|CAN82884.1|	hypothetical protein VITISV_023155 [Vitis vinifera]	gi|359480972|ref|XM_002265707.2|	PREDICTED: Vitis vinifera probable U3 small nucleolar RNA-associated protein 11-like (LOC100255309), mRNA	sp|Q8S1Z1|UTP11_ORYSJ	Probable U3 small nucleolar RNA-associated protein 11 OS=Oryza sativa subsp. japonica GN=Os01g0810000 PE=2 SV=2	COG5223	Uncharacterized conserved protein	K14769	vvi:100255309	U3 small nucleolar RNA-associated protein 11	GO:0009560//embryo sac egg cell differentiation;GO:0000741//karyogamy;GO:0006364//rRNA processing	GO:0005515//protein binding	GO:0005730//nucleolus;GO:0032040//small-subunit processome
462	CSE_Unigene16638	SW_Unigene6931	-	-	+(Mostly)	1350	0.996	6	5	1	0.0704364	0.00540447	gi|296085918|emb|CBI31242.3|	unnamed protein product [Vitis vinifera]	gi|225439242|ref|XM_002277155.1|	PREDICTED: Vitis vinifera uncharacterized LOC100250226 (LOC100250226), mRNA	-	-	COG1346	Putative effector of murein hydrolase	-	-	-	GO:0070838//divalent metal ion transport;GO:0010027//thylakoid membrane organization;GO:0030003//cellular cation homeostasis;GO:0009658//chloroplast organization	-	GO:0005886//plasma membrane;GO:0009706//chloroplast inner membrane
463	CSE_Unigene11419	SW_Unigene21931	-	-	+(Mostly)	1506	0.991	14	4	10	0.82059	0.73886	gi|225439719|ref|XP_002273138.1|	PREDICTED: serine/threonine-protein kinase STN8, chloroplastic [Vitis vinifera]	gi|349715149|emb|FQ380451.1|	Vitis vinifera clone SS0ACG59YJ05	sp|Q9LZV4|STN8_ARATH	Serine/threonine-protein kinase STN8, chloroplastic OS=Arabidopsis thaliana GN=STN8 PE=2 SV=1	COG0515	Serine/threonine protein kinase	K08282	cme:CMS463C	non-specific serine/threonine protein kinase [EC:2.7.11.1]	GO:0006468//protein phosphorylation;GO:0042549//photosystem II stabilization	GO:0005524//ATP binding;GO:0004674//protein serine/threonine kinase activity	GO:0009507//chloroplast;GO:0009579//thylakoid
464	CSE_Unigene17560	SW_Unigene16810	-	-	+(Mostly)	1842	0.961	58	25.1914	32.8086	0.490158	0.00665562	gi|297735543|emb|CBI18037.3|	unnamed protein product [Vitis vinifera]	gi|225439686|ref|XM_002271531.1|	PREDICTED: Vitis vinifera probable receptor-like protein kinase At5g15080 (LOC100246618), mRNA	sp|Q9LFP7|Y5158_ARATH	Probable receptor-like protein kinase At5g15080 OS=Arabidopsis thaliana GN=At5g15080 PE=1 SV=1	COG0515	Serine/threonine protein kinase	K05658	vvi:100262734	ATP-binding cassette, subfamily B (MDR/TAP), member 1	GO:0006468//protein phosphorylation;GO:0006914//autophagy	GO:0004672//protein kinase activity;GO:0005524//ATP binding	GO:0005886//plasma membrane
465	CSE_CL1582_Contig1	SW_Unigene12905	-	-	+(Mostly)	1107	0.992	9	7	2	0.101399	0.00189815	gi|225439671|ref|XP_002270753.1|	PREDICTED: serine/threonine-protein kinase HT1-like [Vitis vinifera]	gi|225439670|ref|XM_002270717.1|	PREDICTED: Vitis vinifera serine/threonine-protein kinase HT1-like (LOC100244846), mRNA	sp|Q2MHE4|HT1_ARATH	Serine/threonine-protein kinase HT1 OS=Arabidopsis thaliana GN=HT1 PE=1 SV=1	COG0515	Serine/threonine protein kinase	K04424	aly:ARALYDRAFT_909157	sterile alpha motif and leucine zipper containing kinase AZK [EC:2.7.11.25]	GO:0006468//protein phosphorylation	GO:0004715//non-membrane spanning protein tyrosine kinase activity;GO:0004712//protein serine/threonine/tyrosine kinase activity;GO:0005524//ATP binding;GO:0004674//protein serine/threonine kinase activity	GO:0005737//cytoplasm
466	CSE_CL3206_Contig2	SW_CL3698_Contig3	-	-	+(Mostly)	1287	0.998	3	1	2	0.60264	0.534404	gi|225441842|ref|XP_002284093.1|	PREDICTED: AP2-like ethylene-responsive transcription factor At2g41710-like [Vitis vinifera]	gi|225441841|ref|XM_002284057.1|	PREDICTED: Vitis vinifera AP2-like ethylene-responsive transcription factor At2g41710-like (LOC100248718), mRNA	sp|Q8GWK2|AP2L4_ARATH	AP2-like ethylene-responsive transcription factor At2g41710 OS=Arabidopsis thaliana GN=At2g41710 PE=2 SV=2	-	-	K09285	vvi:100248718	AP2-like factor, ANT lineage	GO:0055114//oxidation-reduction process;GO:0006355//regulation of transcription, DNA-dependent	GO:0003677//DNA binding;GO:0003700//sequence-specific DNA binding transcription factor activity;GO:0032440//2-alkenal reductase [NAD(P)] activity	GO:0005634//nucleus
467	CSE_CL1781_Contig1	SW_CL3656_Contig2	-	-	+(Mostly)	804	0.994	5	2	3	0.481307	0.352621	gi|225441795|ref|XP_002283838.1|	PREDICTED: zinc finger AN1 and C2H2 domain-containing stress-associated protein 16-like isoform 1 [Vitis vinifera]	gi|147867308|emb|AM460819.2|	Vitis vinifera contig VV78X099670.6, whole genome shotgun sequence	sp|Q0D5B9|SAP16_ORYSJ	Zinc finger AN1 and C2H2 domain-containing stress-associated protein 16 OS=Oryza sativa subsp. japonica GN=SAP16 PE=2 SV=2	-	-	-	-	-	-	GO:0008270//zinc ion binding	GO:0005622//intracellular
468	CSE_CL7101_Contig1	SW_CL3806_Contig2	-	-	+(Mostly)	2025	0.996	8	6	2	0.0971073	0.00245887	gi|225441779|ref|XP_002283552.1|	PREDICTED: GTP-binding protein TypA/BipA homolog isoform 1 [Vitis vinifera] >gi|297739681|emb|CBI29863.3| unnamed protein product [Vitis vinifera]	gi|359481704|ref|XM_002283516.2|	PREDICTED: Vitis vinifera GTP-binding protein TypA/BipA homolog-like, transcript variant 1 (LOC100264026), mRNA	sp|C1N1Y2|GUFP_MICPC	Translation factor GUF1 homolog, chloroplastic OS=Micromonas pusilla (strain CCMP1545) GN=MICPUCDRAFT_51778 PE=3 SV=1	COG1217	Predicted membrane GTPase involved in stress response	K06207	vvi:100264026	GTP-binding protein	GO:0031425//chloroplast RNA processing;GO:0010468//regulation of gene expression;GO:0006414//translational elongation;GO:0006184//GTP catabolic process;GO:0000302//response to reactive oxygen species	GO:0003746//translation elongation factor activity;GO:0005525//GTP binding;GO:0003924//GTPase activity	GO:0009570//chloroplast stroma;GO:0005886//plasma membrane
469	CSE_Unigene14229	SW_Unigene11244	-	-	+(Mostly)	1929	0.996	7	4	3	0.275214	0.0893168	gi|225441756|ref|XP_002277619.1|	PREDICTED: DNA-binding protein SMUBP-2-like [Vitis vinifera]	gi|225441755|ref|XM_002277583.1|	PREDICTED: Vitis vinifera DNA-binding protein SMUBP-2-like (LOC100262429), mRNA	sp|Q9FJR0|RENT1_ARATH	Regulator of nonsense transcripts 1 homolog OS=Arabidopsis thaliana GN=UPF1 PE=1 SV=2	COG1112	Superfamily I DNA and RNA helicases and helicase subunits	K14326	olu:OSTLU_443	regulator of nonsense transcripts 1 [EC:3.6.4.-]	-	GO:0004386//helicase activity;GO:0003677//DNA binding;GO:0005524//ATP binding	GO:0005634//nucleus
470	CSE_Unigene19365	SW_Unigene21602	-	-	+(Mostly)	1566	0.991	14	11	3	0.0981516	7.51985e-05	gi|359481833|ref|XP_002277512.2|	PREDICTED: carboxyl-terminal-processing protease-like [Vitis vinifera]	gi|359481832|ref|XM_002277476.2|	PREDICTED: Vitis vinifera carboxyl-terminal-processing protease-like (LOC100260662), mRNA	sp|O04073|CTPA_SCEOB	C-terminal processing peptidase, chloroplastic OS=Scenedesmus obliquus GN=ctpA PE=1 SV=1	COG0793	Periplasmic protease	K01802	ota:Ot01g03920	peptidylprolyl isomerase [EC:5.2.1.8]	GO:0035556//intracellular signal transduction;GO:0015996//chlorophyll catabolic process;GO:0006508//proteolysis	GO:0008236//serine-type peptidase activity	GO:0005576//extracellular region;GO:0016020//membrane;GO:0009543//chloroplast thylakoid lumen
471	CSE_CL7502_Contig1	SW_CL3153_Contig2	-	-	+(Mostly)	1074	0.993	7	6	1	0.050128	0.000845495	gi|225441674|ref|XP_002282707.1|	PREDICTED: uncharacterized protein C4orf29 homolog [Vitis vinifera] >gi|147852945|emb|CAN81264.1| hypothetical protein VITISV_030682 [Vitis vinifera]	gi|359482041|ref|XM_002282671.2|	PREDICTED: Vitis vinifera uncharacterized LOC100267511 (LOC100267511), mRNA	-	-	-	-	-	-	-	-	-	GO:0005576//extracellular region
472	CSE_CL4842_Contig1	SW_CL2156_Contig1	-	-	+(Mostly)	1068	0.981	12	6	6	0.286394	0.0328778	gi|225441631|ref|XP_002282103.1|	PREDICTED: uncharacterized protein LOC100252010 [Vitis vinifera] >gi|297739753|emb|CBI29935.3| unnamed protein product [Vitis vinifera]	gi|225441630|ref|XM_002282067.1|	PREDICTED: Vitis vinifera uncharacterized LOC100252010 (LOC100252010), mRNA	-	-	-	-	-	-	-	GO:0010264//myo-inositol hexakisphosphate biosynthetic process;GO:0006098//pentose-phosphate shunt;GO:0009773//photosynthetic electron transport in photosystem I	GO:0003824//catalytic activity;GO:0030246//carbohydrate binding	GO:0010598//NAD(P)H dehydrogenase complex (plastoquinone);GO:0009535//chloroplast thylakoid membrane
473	CSE_Unigene12844	SW_CL2582_Contig1	-	-	+(Mostly)	504	0.998	1	NA	1	NA	NA	gi|225441569|ref|XP_002281390.1|	PREDICTED: mediator of RNA polymerase II transcription subunit 7 [Vitis vinifera] >gi|297739781|emb|CBI29963.3| unnamed protein product [Vitis vinifera]	gi|225441568|ref|XM_002281354.1|	PREDICTED: Vitis vinifera mediator of RNA polymerase II transcription subunit 7-like (LOC100257245), mRNA	sp|Q9LYW3|MED7A_ARATH	Mediator of RNA polymerase II transcription subunit 7a OS=Arabidopsis thaliana GN=MED7A PE=1 SV=1	-	-	K15148	vvi:100257245	mediator of RNA polymerase II transcription subunit 7	GO:0006357//regulation of transcription from RNA polymerase II promoter	GO:0005515//protein binding;GO:0001104//RNA polymerase II transcription cofactor activity	GO:0016592//mediator complex
474	CSE_Unigene18171	SW_Unigene18892	-	-	+(Mostly)	4191	0.995	23	16	7	0.151416	1.8494e-06	gi|225441567|ref|XP_002276675.1|	PREDICTED: pre-mRNA-splicing factor rse1-like [Vitis vinifera]	gi|225441566|ref|XM_002276639.1|	PREDICTED: Vitis vinifera pre-mRNA-splicing factor rse1-like (LOC100252096), mRNA	sp|Q9M0V3|DDB1A_ARATH	DNA damage-binding protein 1a OS=Arabidopsis thaliana GN=DDB1A PE=1 SV=1	-	-	K12830	osa:4342674	splicing factor 3B subunit 3	GO:0000956//nuclear-transcribed mRNA catabolic process;GO:0009755//hormone-mediated signaling pathway;GO:0006486//protein glycosylation;GO:0048825//cotyledon development;GO:0010182//sugar mediated signaling pathway	GO:0003676//nucleic acid binding	GO:0005634//nucleus
475	CSE_Unigene9429	SW_Unigene15284	-	-	+(Mostly)	2169	0.993	15	7	8	0.4141	0.128103	gi|225441495|ref|XP_002275839.1|	PREDICTED: gamma-tubulin complex component 3 homolog [Vitis vinifera]	gi|225441494|ref|XM_002275803.1|	PREDICTED: Vitis vinifera gamma-tubulin complex component 3 homolog (LOC100245188), mRNA	sp|Q9M350|GCP4_ARATH	Gamma-tubulin complex component 4 homolog OS=Arabidopsis thaliana GN=At3g53760 PE=2 SV=2	-	-	-	-	-	GO:0007020//microtubule nucleation	GO:0015631//tubulin binding	GO:0005635//nuclear envelope;GO:0000930//gamma-tubulin complex;GO:0009898//internal side of plasma membrane;GO:0000922//spindle pole
476	CSE_Unigene12549	SW_Unigene13226	-	-	+(Mostly)	690	0.996	3	2	1	0.174117	0.149448	gi|225441313|ref|XP_002275793.1|	PREDICTED: ganglioside-induced differentiation-associated-protein 2 [Vitis vinifera] >gi|297739900|emb|CBI30082.3| unnamed protein product [Vitis vinifera]	gi|359482205|ref|XM_002275757.2|	PREDICTED: Vitis vinifera ganglioside-induced differentiation-associated-protein 2-like (LOC100246998), mRNA	-	-	-	-	-	-	-	-	-	GO:0005737//cytoplasm
477	CSE_Unigene832	SW_CL2088_Contig3	-	-	+(Mostly)	705	0.991	6	3	3	0.42833	0.256327	gi|225441260|ref|XP_002274343.1|	PREDICTED: tubulin-specific chaperone B isoform 1 [Vitis vinifera] >gi|359482231|ref|XP_003632738.1| PREDICTED: tubulin-specific chaperone B [Vitis vinifera] >gi|297739921|emb|CBI30103.3| unnamed protein product [Vitis vinifera]	gi|359482230|ref|XM_003632690.1|	PREDICTED: Vitis vinifera tubulin-specific chaperone B-like (LOC100250251), mRNA	-	-	COG5244	Dynactin complex subunit involved in mitotic spindle partitioning in anaphase B	K14835	ota:Ot03g00050	ribosomal RNA methyltransferase Nop2 [EC:2.1.1.-]	GO:0009790//embryo development;GO:0051301//cell division;GO:0007021//tubulin complex assembly	-	GO:0009524//phragmoplast;GO:0005634//nucleus;GO:0009536//plastid
478	CSE_CL2596_Contig1	SW_Unigene21118	-	-	+(Mostly)	1386	0.994	9	7	2	0.102827	0.000165276	gi|225441258|ref|XP_002274313.1|	PREDICTED: cystathionine beta-lyase, chloroplastic [Vitis vinifera] >gi|297739922|emb|CBI30104.3| unnamed protein product [Vitis vinifera]	gi|225441257|ref|XM_002274277.1|	PREDICTED: Vitis vinifera cystathionine beta-lyase, chloroplastic-like (LOC100260731), mRNA	sp|P53780|METC_ARATH	Cystathionine beta-lyase, chloroplastic OS=Arabidopsis thaliana GN=At3g57050 PE=1 SV=1	COG0626	Cystathionine beta-lyases/cystathionine gamma-synthases	K01760	vvi:100260731	cystathionine beta-lyase [EC:4.4.1.8]	GO:0019279//L-methionine biosynthetic process from L-homoserine via cystathionine;GO:0000394//RNA splicing, via endonucleolytic cleavage and ligation	GO:0004123//cystathionine gamma-lyase activity;GO:0080146//L-cysteine desulfhydrase activity;GO:0004121//cystathionine beta-lyase activity;GO:0044540//L-cystine L-cysteine-lyase (deaminating);GO:0030170//pyridoxal phosphate binding	GO:0009570//chloroplast stroma
479	CSE_Unigene14365	SW_Unigene12773	-	-	+(Mostly)	1638	0.993	12	7	5	0.297239	0.0349529	gi|225441108|ref|XP_002265015.1|	PREDICTED: carotene epsilon-monooxygenase, chloroplastic-like [Vitis vinifera]	gi|225441107|ref|XM_002264979.1|	PREDICTED: Vitis vinifera carotene epsilon-monooxygenase, chloroplastic-like (LOC100243621), mRNA	sp|Q6TBX7|LUT1_ARATH	Carotene epsilon-monooxygenase, chloroplastic OS=Arabidopsis thaliana GN=CYP97C1 PE=1 SV=1	COG2124	Cytochrome P450	K09837	vvi:100243621	carotene epsilon-monooxygenase [EC:1.14.99.45]	GO:0010103//stomatal complex morphogenesis;GO:0016117//carotenoid biosynthetic process;GO:0006636//unsaturated fatty acid biosynthetic process;GO:0019288//isopentenyl diphosphate biosynthetic process, mevalonate-independent pathway;GO:0016556//mRNA modification;GO:0015995//chlorophyll biosynthetic process;GO:0009965//leaf morphogenesis;GO:0030154//cell differentiation;GO:0055114//oxidation-reduct…	GO:0070330//aromatase activity;GO:0020037//heme binding;GO:0009055//electron carrier activity;GO:0019825//oxygen binding;GO:0005506//iron ion binding;GO:0009974//zeinoxanthin epsilon hydroxylase activity	GO:0009941//chloroplast envelope
480	CSE_Unigene18809	SW_Unigene560	-	-	+(Mostly)	1101	0.99	11	9	2	0.0775305	0.000177626	gi|225440994|ref|XP_002283576.1|	PREDICTED: delta(14)-sterol reductase [Vitis vinifera] >gi|297740061|emb|CBI30243.3| unnamed protein product [Vitis vinifera]	gi|359482308|ref|XM_002283540.2|	PREDICTED: Vitis vinifera delta(14)-sterol reductase-like (LOC100247778), mRNA	sp|Q9LDR4|ERG24_ARATH	Delta(14)-sterol reductase OS=Arabidopsis thaliana GN=FK PE=1 SV=2	-	-	K00222	vvi:100247778	delta14-sterol reductase [EC:1.3.1.70]	GO:0016132//brassinosteroid biosynthetic process;GO:0055114//oxidation-reduction process;GO:0006084//acetyl-CoA metabolic process;GO:0019745//pentacyclic triterpenoid biosynthetic process;GO:0009793//embryo development ending in seed dormancy;GO:0016126//sterol biosynthetic process	GO:0050613//delta14-sterol reductase activity	GO:0016023//cytoplasmic membrane-bounded vesicle;GO:0016020//membrane;GO:0005634//nucleus
481	CSE_Unigene12326	SW_CL8118_Contig1	-	-	+(Mostly)	1023	0.988	12	5	7	0.54444	0.31518	gi|359482324|ref|XP_002283153.2|	PREDICTED: uridine nucleosidase 1-like [Vitis vinifera] >gi|297740083|emb|CBI30265.3| unnamed protein product [Vitis vinifera]	gi|359482323|ref|XM_002283117.2|	PREDICTED: Vitis vinifera uridine nucleosidase 1-like (LOC100266594), mRNA	sp|Q9SJM7|URH1_ARATH	Uridine nucleosidase 1 OS=Arabidopsis thaliana GN=URH1 PE=1 SV=2	COG1957	Inosine-uridine nucleoside N-ribohydrolase	K01240	pop:POPTR_717449	uridine nucleosidase [EC:3.2.2.3]	GO:0006218//uridine catabolic process;GO:0006152//purine nucleoside catabolic process	GO:0045437//uridine nucleosidase activity;GO:0047622//adenosine nucleosidase activity;GO:0072585//xanthosine nucleotidase activity;GO:0047724//inosine nucleosidase activity	GO:0005829//cytosol
482	CSE_Unigene12883	SW_Unigene15602	-	-	+(Mostly)	993	0.991	9	3	6	0.609153	0.354572	gi|225440825|ref|XP_002282116.1|	PREDICTED: abhydrolase domain-containing protein 11 [Vitis vinifera] >gi|297740142|emb|CBI30324.3| unnamed protein product [Vitis vinifera]	gi|225440824|ref|XM_002282080.1|	PREDICTED: Vitis vinifera abhydrolase domain-containing protein 11-like (LOC100256369), mRNA	-	-	COG0596	Predicted hydrolases or acyltransferases (alpha/beta hydrolase superfamily)	-	-	-	GO:0006635//fatty acid beta-oxidation;GO:0006886//intracellular protein transport;GO:0006505//GPI anchor metabolic process	GO:0016788//hydrolase activity, acting on ester bonds;GO:0005524//ATP binding	GO:0005739//mitochondrion;GO:0031227//intrinsic to endoplasmic reticulum membrane
483	CSE_Unigene10258	SW_Unigene8220	-	-	+(Mostly)	495	0.994	3	3	NA	0	NA	gi|225440807|ref|XP_002281866.1|	PREDICTED: peptidyl-prolyl cis-trans isomerase-like 1 [Vitis vinifera] >gi|297740153|emb|CBI30335.3| unnamed protein product [Vitis vinifera]	gi|359481617|ref|XM_002281830.2|	PREDICTED: Vitis vinifera peptidyl-prolyl cis-trans isomerase-like 1 (LOC100264827), mRNA	sp|Q9FJX0|PPIL2_ARATH	Peptidyl-prolyl cis-trans isomerase-like 2 OS=Arabidopsis thaliana GN=PUB49 PE=2 SV=1	COG0652	Peptidyl-prolyl cis-trans isomerase (rotamase) - cyclophilin family	K12733	vvi:100264827	peptidyl-prolyl cis-trans isomerase-like 1 [EC:5.2.1.8]	GO:0006457//protein folding;GO:0000413//protein peptidyl-prolyl isomerization	GO:0003755//peptidyl-prolyl cis-trans isomerase activity	GO:0005829//cytosol
484	CSE_Unigene5028	SW_Unigene23236	-	-	+(Mostly)	1254	0.99	12	8	4	0.179242	0.00412014	gi|225440612|ref|XP_002273820.1|	PREDICTED: probable anion transporter 3, chloroplastic-like [Vitis vinifera]	gi|359482060|ref|XM_002273784.2|	PREDICTED: Vitis vinifera probable anion transporter 3, chloroplastic-like (LOC100245864), mRNA	sp|Q7XJR2|ANTR3_ARATH	Probable anion transporter 3, chloroplastic OS=Arabidopsis thaliana GN=ANTR3 PE=2 SV=2	COG0477	Permeases of the major facilitator superfamily	K08193	olu:OSTLU_2927	MFS transporter, ACS family, solute carrier family 17 (sodium-dependent inorganic phosphate cotransporter), other	GO:0055085//transmembrane transport;GO:0006811//ion transport	GO:0005315//inorganic phosphate transmembrane transporter activity	GO:0031969//chloroplast membrane;GO:0016021//integral to membrane
485	CSE_CL5456_Contig2	SW_CL7643_Contig3	-	-	+(Mostly)	1533	0.996	6	4	2	0.168263	0.038611	gi|225440348|ref|XP_002270322.1|	PREDICTED: dol-P-Glc:Glc(2)Man(9)GlcNAc(2)-PP-Dol alpha-1,2-glucosyltransferase [Vitis vinifera] >gi|297740379|emb|CBI30561.3| unnamed protein product [Vitis vinifera]	gi|225440347|ref|XM_002270286.1|	PREDICTED: Vitis vinifera dol-P-Glc:Glc(2)Man(9)GlcNAc(2)-PP-Dol alpha-1,2-glucosyltransferase-like (LOC100249516), mRNA	-	-	-	-	K03850	vvi:100249516	alpha-1,2-glucosyltransferase [EC:2.4.1.256]	GO:0048366//leaf development;GO:0009651//response to salt stress;GO:0006487//protein N-linked glycosylation	GO:0046527//glucosyltransferase activity	GO:0016021//integral to membrane;GO:0005783//endoplasmic reticulum
486	CSE_Unigene10397	SW_Unigene13736	-	-	+(Mostly)	474	0.979	10	6	4	0.219613	0.020056	gi|225443174|ref|XP_002265564.1|	PREDICTED: probable methylene-fatty-acyl-phospholipid synthase [Vitis vinifera] >gi|298204671|emb|CBI25169.3| unnamed protein product [Vitis vinifera]	gi|225443173|ref|XM_002265528.1|	PREDICTED: Vitis vinifera probable methylene-fatty-acyl-phospholipid synthase-like (LOC100258621), mRNA	-	-	-	-	-	-	-	GO:0008654//phospholipid biosynthetic process;GO:0032259//methylation	GO:0000773//phosphatidyl-N-methylethanolamine N-methyltransferase activity;GO:0080101//phosphatidyl-N-dimethylethanolamine N-methyltransferase activity	GO:0009507//chloroplast
487	CSE_CL7038_Contig1	SW_Unigene20338	-	-	+(Mostly)	1134	0.986	16	11	5	0.152447	0.000331618	gi|225443166|ref|XP_002264352.1|	PREDICTED: uncharacterized protein LOC100263772 [Vitis vinifera]	gi|359483161|ref|XM_002264316.2|	PREDICTED: Vitis vinifera uncharacterized LOC100263772 (LOC100263772), mRNA	-	-	-	-	-	-	-	GO:0016226//iron-sulfur cluster assembly;GO:0010207//photosystem II assembly;GO:0009073//aromatic amino acid family biosynthetic process	-	GO:0009571//proplastid stroma;GO:0009570//chloroplast stroma
488	CSE_Unigene15226	SW_Unigene21511	-	-	+(Mostly)	1248	0.991	11	8	3	0.151204	0.00327733	gi|225443227|ref|XP_002270610.1|	PREDICTED: probable serine incorporator [Vitis vinifera] >gi|298204750|emb|CBI25248.3| unnamed protein product [Vitis vinifera]	gi|359483131|ref|XM_002270574.2|	PREDICTED: Vitis vinifera probable serine incorporator-like (LOC100262087), mRNA	-	-	-	-	-	-	-	GO:0006623//protein targeting to vacuole;GO:0016192//vesicle-mediated transport	-	GO:0016020//membrane;GO:0009536//plastid
489	CSE_Unigene16853	SW_CL5523_Contig3	-	-	+(Mostly)	831	0.989	9	5	4	0.324573	0.0862815	gi|359483143|ref|XP_003632910.1|	PREDICTED: unknown protein DS12 from 2D-PAGE of leaf, chloroplastic-like [Vitis vinifera] >gi|298204773|emb|CBI25271.3| unnamed protein product [Vitis vinifera]	gi|349731426|emb|FQ394547.1|	Vitis vinifera clone SS0AFA20YB04	sp|Q0J709|UP12_ORYSJ	Unknown protein DS12 from 2D-PAGE of leaf, chloroplastic OS=Oryza sativa subsp. japonica GN=Os08g0242700 PE=2 SV=2	COG5080	Rab GTPase interacting factor, Golgi membrane protein	-	-	-	GO:0009744//response to sucrose stimulus;GO:0019684//photosynthesis, light reaction;GO:0009750//response to fructose stimulus;GO:0009651//response to salt stress;GO:0042742//defense response to bacterium;GO:0009416//response to light stimulus;GO:0009409//response to cold;GO:0006833//water transport;GO:0030003//cellular cation homeostasis;GO:0070838//divalent metal ion transport	-	GO:0009941//chloroplast envelope;GO:0009535//chloroplast thylakoid membrane;GO:0009570//chloroplast stroma;GO:0010319//stromule
490	CSE_Unigene16186	SW_Unigene16753	-	-	+(Mostly)	972	0.996	4	2	2	0.336701	0.261858	gi|225443292|ref|XP_002274572.1|	PREDICTED: uncharacterized protein LOC100260424 [Vitis vinifera]	gi|359483151|ref|XM_002274536.2|	PREDICTED: Vitis vinifera uncharacterized LOC100260424 (LOC100260424), mRNA	-	-	-	-	-	-	-	GO:0009767//photosynthetic electron transport chain;GO:0009791//post-embryonic development;GO:0070455//positive regulation of heme biosynthetic process	GO:0043495//protein anchor;GO:0016491//oxidoreductase activity;GO:0010181//FMN binding	GO:0009534//chloroplast thylakoid;GO:0009570//chloroplast stroma
491	CSE_Unigene8542	SW_Unigene14467	-	-	+(Mostly)	675	0.996	3	2	1	0.159551	0	gi|297742953|emb|CBI35820.3|	unnamed protein product [Vitis vinifera]	gi|225442027|ref|XM_002268870.1|	PREDICTED: Vitis vinifera probable complex I intermediate-associated protein 30-like, transcript variant 1 (LOC100256635), mRNA	sp|Q9LQI7|CIA30_ARATH	Probable complex I intermediate-associated protein 30 OS=Arabidopsis thaliana GN=At1g17350 PE=1 SV=2	COG0702	Predicted nucleoside-diphosphate-sugar epimerases	-	-	-	GO:0009736//cytokinin mediated signaling pathway	-	GO:0005739//mitochondrion
492	CSE_Unigene15788	SW_Unigene18710	-	-	+(Mostly)	2631	0.993	19	15	4	0.0940575	2.37201e-06	gi|297742971|emb|CBI35838.3|	unnamed protein product [Vitis vinifera]	gi|225442057|ref|XR_077686.1|	PREDICTED: Vitis vinifera uncharacterized LOC100242984 (LOC100242984), miscRNA	-	-	-	-	K14301	pop:POPTR_745842	nuclear pore complex protein Nup107	GO:0006810//transport	GO:0005515//protein binding	GO:0005643//nuclear pore
493	CSE_CL5779_Contig1	SW_Unigene8476	-	-	+(Mostly)	765	1	0	NA	NA	NA	NA	gi|225442349|ref|XP_002281163.1|	PREDICTED: RWD domain-containing protein 1-like [Vitis vinifera]	gi|359482863|ref|XM_002281127.2|	PREDICTED: Vitis vinifera RWD domain-containing protein 1-like (LOC100267005), mRNA	sp|Q9LX30|GCN2_ARATH	Probable serine/threonine-protein kinase GCN2 OS=Arabidopsis thaliana GN=GCN2 PE=2 SV=2	-	-	K11323	vcn:VOLCADRAFT_121342	histone arginine demethylase JMJD6 [EC:1.14.11.-]	-	-	GO:0005737//cytoplasm
494	CSE_Unigene1841	SW_Unigene17487	-	-	+(Mostly)	1356	0.99	13	6	7	0.345946	0.0563396	gi|359482890|ref|XP_002283628.2|	PREDICTED: proline-rich receptor-like protein kinase PERK10-like [Vitis vinifera]	gi|359482889|ref|XM_002283592.2|	PREDICTED: Vitis vinifera proline-rich receptor-like protein kinase PERK10-like (LOC100256626), mRNA	sp|F4IB81|LYK3_ARATH	LysM domain receptor-like kinase 3 OS=Arabidopsis thaliana GN=LYK3 PE=2 SV=1	COG0515	Serine/threonine protein kinase	K13429	ppp:PHYPADRAFT_1279	chitin elicitor receptor kinase 1	GO:0006468//protein phosphorylation;GO:0007020//microtubule nucleation;GO:0016998//cell wall macromolecule catabolic process	GO:0004715//non-membrane spanning protein tyrosine kinase activity;GO:0005524//ATP binding;GO:0004674//protein serine/threonine kinase activity	GO:0005886//plasma membrane
495	CSE_Unigene6821	SW_Unigene24549	-	-	+(Mostly)	588	0.998	1	NA	1	NA	NA	gi|359482329|ref|XP_003632756.1|	PREDICTED: DNA replication complex GINS protein PSF1-like [Vitis vinifera] >gi|297743415|emb|CBI36282.3| unnamed protein product [Vitis vinifera]	gi|359482328|ref|XM_003632708.1|	PREDICTED: Vitis vinifera DNA replication complex GINS protein PSF1-like (LOC100256728), mRNA	-	-	COG5230	Uncharacterized conserved protein	K10732	vvi:100256728	GINS complex subunit 1	GO:0006270//DNA replication initiation	-	GO:0000811//GINS complex;GO:0009507//chloroplast
496	CSE_CL2319_Contig2	SW_CL5327_Contig3	-	-	+(Mostly)	813	0.877	76	27.695	48.305	0.678018	0.111035	gi|225442881|ref|XP_002281834.1|	PREDICTED: peptide deformylase 1A, chloroplastic [Vitis vinifera] >gi|297743418|emb|CBI36285.3| unnamed protein product [Vitis vinifera]	gi|225442880|ref|XM_002281798.1|	PREDICTED: Vitis vinifera peptide deformylase 1A, chloroplastic-like (LOC100258283), mRNA	sp|Q9FUZ0|DEF1A_SOLLC	Peptide deformylase 1A, chloroplastic OS=Solanum lycopersicum GN=PDF1A PE=2 SV=1	COG0242	N-formylmethionyl-tRNA deformylase	K01462	vvi:100258283	peptide deformylase [EC:3.5.1.88]	GO:0043686//co-translational protein modification;GO:0006412//translation	GO:0005506//iron ion binding;GO:0042586//peptide deformylase activity	GO:0009505//plant-type cell wall;GO:0009570//chloroplast stroma;GO:0005739//mitochondrion
497	CSE_Unigene13832	SW_Unigene23278	-	-	+(Mostly)	1479	0.993	11	9	2	0.0658921	6.35717e-05	gi|225443035|ref|XP_002268792.1|	PREDICTED: sodium-coupled neutral amino acid transporter 4 [Vitis vinifera]	gi|147827329|emb|AM481844.2|	Vitis vinifera contig VV78X104973.15, whole genome shotgun sequence	sp|O22719|LHTL3_ARATH	Lysine histidine transporter-like 3 OS=Arabidopsis thaliana GN=At1g61270 PE=3 SV=2	COG0814	Amino acid permeases	K14207	rcu:RCOM_0012320	solute carrier family 38 (sodium-coupled neutral amino acid transporter), member 2	GO:0006865//amino acid transport	GO:0015171//amino acid transmembrane transporter activity	GO:0016021//integral to membrane;GO:0005886//plasma membrane
498	CSE_Unigene10714	SW_Unigene8045	-	-	+(Mostly)	474	0.992	4	3	1	0.123398	0.0587034	gi|225443379|ref|XP_002266544.1|	PREDICTED: reticulon-like protein B22 [Vitis vinifera] >gi|297735759|emb|CBI18446.3| unnamed protein product [Vitis vinifera]	gi|225443378|ref|XM_002266508.1|	PREDICTED: Vitis vinifera reticulon-like protein B22 (LOC100259765), mRNA	sp|Q8GWH5|RTNLT_ARATH	Reticulon-like protein B22 OS=Arabidopsis thaliana GN=RTNLB22 PE=2 SV=1	-	-	K07748	pop:POPTR_1081290	sterol-4alpha-carboxylate 3-dehydrogenase (decarboxylating) [EC:1.1.1.170]	-	-	GO:0005739//mitochondrion;GO:0005783//endoplasmic reticulum
499	CSE_Unigene16685	SW_Unigene16221	-	-	+(Mostly)	1383	0.99	14	8	6	0.264969	0.0141314	gi|225443326|ref|XP_002262765.1|	PREDICTED: metal tolerance protein C4 [Vitis vinifera] >gi|297735796|emb|CBI18483.3| unnamed protein product [Vitis vinifera]	gi|359483241|ref|XM_002262729.2|	PREDICTED: Vitis vinifera metal tolerance protein C4-like (LOC100256503), mRNA	sp|Q8H1G3|MTPC4_ARATH	Metal tolerance protein C4 OS=Arabidopsis thaliana GN=MTPC4 PE=2 SV=1	COG0053	Predicted Co/Zn/Cd cation transporters	K14696	vvi:100256503	solute carrier family 30 (zinc transporter), member 9	GO:0006812//cation transport;GO:0055085//transmembrane transport	GO:0015562//efflux transmembrane transporter activity;GO:0008324//cation transmembrane transporter activity	GO:0016021//integral to membrane
500	CSE_CL1467_Contig5	SW_CL3708_Contig2	-	-	+(Mostly)	1665	0.989	19	6	13	0.818254	0.793953	gi|302144089|emb|CBI23194.3|	unnamed protein product [Vitis vinifera]	gi|359483386|ref|XM_002264378.2|	PREDICTED: Vitis vinifera malonyl-CoA decarboxylase, mitochondrial-like (LOC100246958), mRNA	-	-	COG1593	TRAP-type C4-dicarboxylate transport system, large permease component	K01578	vvi:100246958	malonyl-CoA decarboxylase [EC:4.1.1.9]	GO:0006633//fatty acid biosynthetic process	GO:0050080//malonyl-CoA decarboxylase activity	GO:0005777//peroxisome
501	CSE_CL7152_Contig1	SW_Unigene6793	-	-	+(Mostly)	1368	0.99	13	11	2	0.0627916	1.59659e-05	gi|302144145|emb|CBI23250.3|	unnamed protein product [Vitis vinifera]	gi|225444506|ref|XM_002268645.1|	PREDICTED: Vitis vinifera uncharacterized LOC100255582 (LOC100255582), mRNA	sp|Q8GUI4|UGPI6_ARATH	Uncharacterized GPI-anchored protein At1g61900 OS=Arabidopsis thaliana GN=At1g61900 PE=1 SV=1	-	-	-	-	-	-	-	GO:0046658//anchored to plasma membrane;GO:0009506//plasmodesma;GO:0005739//mitochondrion
502	CSE_Unigene1196	SW_Unigene12189	-	-	+(Mostly)	1857	0.994	11	8	3	0.11254	0.000690198	gi|359483663|ref|XP_002279791.2|	PREDICTED: putative leucine-rich repeat receptor-like serine/threonine-protein kinase At2g14440-like [Vitis vinifera] >gi|297740416|emb|CBI30598.3| unnamed protein product [Vitis vinifera]	gi|147799251|emb|AM463041.2|	Vitis vinifera contig VV78X003963.8, whole genome shotgun sequence	sp|Q9FN94|RLK7_ARATH	Receptor-like protein kinase At5g59670 OS=Arabidopsis thaliana GN=At5g59670 PE=1 SV=1	COG4886	Leucine-rich repeat (LRR) protein	K13420	vvi:100253808	LRR receptor-like serine/threonine-protein kinase FLS2 [EC:2.7.11.1]	GO:0016310//phosphorylation;GO:0007165//signal transduction	GO:0016301//kinase activity	GO:0005768//endosome;GO:0005794//Golgi apparatus;GO:0005886//plasma membrane;GO:0005802//trans-Golgi network
503	CSE_Unigene490	SW_Unigene1362	-	-	+(Mostly)	843	0.993	6	3	3	0.269191	0.115649	gi|297740592|emb|CBI30774.3|	unnamed protein product [Vitis vinifera]	gi|349715194|emb|FQ380496.1|	Vitis vinifera clone SS0ACG55YI17	sp|Q2V3H0|PP322_ARATH	Pentatricopeptide repeat-containing protein At4g18975, chloroplastic OS=Arabidopsis thaliana GN=At4g18975 PE=2 SV=2	-	-	-	-	-	-	-	GO:0009507//chloroplast
504	CSE_Unigene11486	SW_Unigene7062	-	-	+(Mostly)	630	0.983	11	6	5	0.398681	0.177866	gi|225463388|ref|XP_002273366.1|	PREDICTED: uncharacterized protein LOC100265908 [Vitis vinifera] >gi|297740634|emb|CBI30816.3| unnamed protein product [Vitis vinifera]	gi|225463387|ref|XM_002273330.1|	PREDICTED: Vitis vinifera uncharacterized LOC100265908 (LOC100265908), mRNA	sp|Q94AL8|CRIM1_ARATH	Cold-regulated 413 inner membrane protein 1, chloroplastic OS=Arabidopsis thaliana GN=COR413IM1 PE=1 SV=1	-	-	-	-	-	GO:0009269//response to desiccation;GO:0042538//hyperosmotic salinity response;GO:0042631//cellular response to water deprivation;GO:0009737//response to abscisic acid stimulus;GO:0009631//cold acclimation;GO:0070417//cellular response to cold;GO:0030003//cellular cation homeostasis;GO:0070838//divalent metal ion transport	-	GO:0031357//integral to chloroplast inner membrane;GO:0009535//chloroplast thylakoid membrane
505	CSE_CL4980_Contig1	SW_CL5878_Contig1	-	-	+(Mostly)	522	0.992	4	2	2	0.329653	0.256005	gi|225463454|ref|XP_002275908.1|	PREDICTED: high mobility group B protein 14 [Vitis vinifera] >gi|297740668|emb|CBI30850.3| unnamed protein product [Vitis vinifera]	gi|349711459|emb|FQ379078.1|	Vitis vinifera clone SS0AEB11YI17	sp|O64702|HMG14_ARATH	High mobility group B protein 14 OS=Arabidopsis thaliana GN=HMGB14 PE=2 SV=2	COG5648	Chromatin-associated proteins containing the HMG domain	K10802	vvi:100256381	high mobility group protein B1	GO:0006333//chromatin assembly or disassembly	GO:0003700//sequence-specific DNA binding transcription factor activity	GO:0005634//nucleus;GO:0009536//plastid
506	CSE_Unigene14413	SW_CL6462_Contig1	-	-	+(Mostly)	1917	0.994	12	7	5	0.217576	0.00993988	gi|225444543|ref|XP_002275664.1|	PREDICTED: mannosyl-oligosaccharide 1,2-alpha-mannosidase MNS3-like [Vitis vinifera]	gi|359483862|ref|XM_002275628.2|	PREDICTED: Vitis vinifera mannosyl-oligosaccharide 1,2-alpha-mannosidase MNS3-like (LOC100243430), mRNA	sp|Q93Y37|MNS3_ARATH	Mannosyl-oligosaccharide 1,2-alpha-mannosidase MNS3 OS=Arabidopsis thaliana GN=MNS3 PE=2 SV=1	-	-	K01230	vvi:100243430	mannosyl-oligosaccharide alpha-1,2-mannosidase [EC:3.2.1.113]	GO:0006491//N-glycan processing;GO:0048364//root development;GO:0043090//amino acid import;GO:0006888//ER to Golgi vesicle-mediated transport	GO:0005509//calcium ion binding;GO:0004571//mannosyl-oligosaccharide 1,2-alpha-mannosidase activity	GO:0005768//endosome;GO:0005802//trans-Golgi network;GO:0016020//membrane;GO:0005794//Golgi apparatus
507	CSE_Unigene15727	SW_Unigene18546	-	-	+(Mostly)	2172	0.987	29	13.751	15.249	0.467893	0.0394889	gi|225443962|ref|XP_002280109.1|	PREDICTED: uncharacterized membrane protein C24H6.13-like [Vitis vinifera]	gi|225443961|ref|XM_002280073.1|	PREDICTED: Vitis vinifera uncharacterized LOC100260008 (LOC100260008), mRNA	-	-	COG5594	Uncharacterized integral membrane protein	K03021	ota:Ot01g06000	DNA-directed RNA polymerase III subunit RPC2 [EC:2.7.7.6]	-	-	GO:0009941//chloroplast envelope;GO:0009506//plasmodesma;GO:0016023//cytoplasmic membrane-bounded vesicle;GO:0005886//plasma membrane;GO:0005774//vacuolar membrane;GO:0005576//extracellular region
508	CSE_CL2892_Contig2	SW_CL6960_Contig1	-	-	+(Mostly)	867	0.993	6	4	2	0.161794	0.035016	gi|359483478|ref|XP_002269427.2|	PREDICTED: uncharacterized oxidoreductase C663.09c-like [Vitis vinifera] >gi|297740911|emb|CBI31093.3| unnamed protein product [Vitis vinifera]	gi|359483477|ref|XM_002269391.2|	PREDICTED: Vitis vinifera uncharacterized LOC100247377 (LOC100247377), mRNA	sp|A2RVM0|TIC32_ARATH	Short-chain dehydrogenase TIC 32, chloroplastic OS=Arabidopsis thaliana GN=TIC32 PE=2 SV=1	COG1028	Dehydrogenases with different specificities (related to short-chain alcohol dehydrogenases)	K09841	bdi:100827045	xanthoxin dehydrogenase [EC:1.1.1.288]	GO:0019252//starch biosynthetic process;GO:0055114//oxidation-reduction process	GO:0016491//oxidoreductase activity;GO:0000166//nucleotide binding	GO:0009507//chloroplast
509	CSE_CL4798_Contig1	SW_CL2131_Contig2	-	-	+(Mostly)	882	0.985	13	8	5	0.171802	0.0021882	gi|296085263|emb|CBI28995.3|	unnamed protein product [Vitis vinifera]	gi|225462550|ref|XM_002267363.1|	PREDICTED: Vitis vinifera superoxide dismutase [Fe], chloroplastic-like (LOC100263457), mRNA	sp|Q9FMX0|SODF3_ARATH	Superoxide dismutase [Fe] 3, chloroplastic OS=Arabidopsis thaliana GN=FSD3 PE=1 SV=1	COG0605	Superoxide dismutase	K04564	pop:POPTR_253123	superoxide dismutase, Fe-Mn family [EC:1.15.1.1]	GO:0019430//removal of superoxide radicals;GO:0055114//oxidation-reduction process	GO:0046872//metal ion binding;GO:0005515//protein binding;GO:0004784//superoxide dismutase activity	GO:0042644//chloroplast nucleoid;GO:0009579//thylakoid
510	CSE_Unigene778	SW_Unigene8357	-	-	+(Mostly)	453	0.987	6	3	3	0.397558	0.228978	gi|225462560|ref|XP_002267649.1|	PREDICTED: probable prefoldin subunit 5 [Vitis vinifera] >gi|147795534|emb|CAN63324.1| hypothetical protein VITISV_018866 [Vitis vinifera]	gi|349708281|emb|FQ378288.1|	Vitis vinifera clone SS0AEB13YP24	sp|P57742|PFD5_ARATH	Probable prefoldin subunit 5 OS=Arabidopsis thaliana GN=At5g23290 PE=1 SV=1	COG1730	Predicted prefoldin, molecular chaperone implicated in de novo protein folding	K04797	vvi:100243012	prefoldin alpha subunit	GO:0006457//protein folding	GO:0051082//unfolded protein binding	GO:0016272//prefoldin complex
511	CSE_Unigene19673	SW_Unigene10620	-	-	+(Mostly)	1569	0.995	8	5	3	0.180549	0.0198083	gi|225465698|ref|XP_002273428.1|	PREDICTED: uncharacterized protein LOC100263135 [Vitis vinifera]	gi|359484036|ref|XM_002273392.2|	PREDICTED: Vitis vinifera uncharacterized LOC100263135 (LOC100263135), mRNA	sp|Q9SKC3|ARI9_ARATH	Probable E3 ubiquitin-protein ligase ARI9 OS=Arabidopsis thaliana GN=ARI9 PE=2 SV=1	-	-	K11975	smo:SELMODRAFT_48577	E3 ubiquitin-protein ligase RNF144 [EC:6.3.2.19]	-	GO:0003676//nucleic acid binding;GO:0008270//zinc ion binding;GO:0016874//ligase activity	GO:0005634//nucleus
512	CSE_CL7541_Contig1	SW_CL133_Contig2	-	-	+(Mostly)	1212	0.984	19	13	6	0.190184	0.0005183	gi|225463807|ref|XP_002270791.1|	PREDICTED: alpha-galactosidase [Vitis vinifera] >gi|297742709|emb|CBI35343.3| unnamed protein product [Vitis vinifera]	gi|225463806|ref|XM_002270755.1|	PREDICTED: Vitis vinifera alpha-galactosidase-like (LOC100245638), mRNA	sp|Q42656|AGAL_COFAR	Alpha-galactosidase OS=Coffea arabica PE=1 SV=1	-	-	K07407	vvi:100245638	alpha-galactosidase [EC:3.2.1.22]	GO:0046477//glycosylceramide catabolic process;GO:0009311//oligosaccharide metabolic process;GO:0016139//glycoside catabolic process	GO:0052692//raffinose alpha-galactosidase activity	GO:0009505//plant-type cell wall;GO:0016023//cytoplasmic membrane-bounded vesicle;GO:0048046//apoplast
513	CSE_Unigene2047	SW_Unigene22871	-	-	+(Mostly)	1119	0.991	10	6	4	0.157654	0.00519848	gi|225463758|ref|XP_002267285.1|	PREDICTED: calumenin [Vitis vinifera] >gi|297742738|emb|CBI35372.3| unnamed protein product [Vitis vinifera]	gi|359484120|ref|XM_002267249.2|	PREDICTED: Vitis vinifera calumenin-like (LOC100262960), mRNA	sp|Q948R0|CML5_ORYSJ	Calmodulin-like protein 5 OS=Oryza sativa subsp. japonica GN=CML5 PE=2 SV=1	-	-	K13448	ath:AT3G59440	calcium-binding protein CML	GO:0034968//histone lysine methylation;GO:0009909//regulation of flower development;GO:0007165//signal transduction	GO:0005509//calcium ion binding	GO:0005783//endoplasmic reticulum;GO:0005794//Golgi apparatus;GO:0005886//plasma membrane
514	CSE_Unigene12672	SW_Unigene7406	-	-	+(Mostly)	867	0.982	13	8	5	0.263456	0.017688	gi|297742760|emb|CBI35394.3|	unnamed protein product [Vitis vinifera]	gi|359484180|ref|XM_002273357.2|	PREDICTED: Vitis vinifera riboflavin biosynthesis protein ribF-like (LOC100254929), mRNA	-	-	COG0196	FAD synthase	-	-	-	GO:0009231//riboflavin biosynthetic process;GO:0032259//methylation	GO:0003919//FMN adenylyltransferase activity;GO:0008168//methyltransferase activity	GO:0005634//nucleus
515	CSE_CL3214_Contig4	SW_CL2492_Contig2	-	-	+(Mostly)	981	0.988	9	7	2	0.0874521	0.000914101	gi|296090301|emb|CBI40120.3|	unnamed protein product [Vitis vinifera]	gi|359484976|ref|XM_002266781.2|	PREDICTED: Vitis vinifera metaxin-2-like (LOC100267718), mRNA	sp|O64471|MTX_ARATH	Mitochondrial outer membrane import complex protein METAXIN OS=Arabidopsis thaliana GN=MTX1 PE=1 SV=1	-	-	-	-	-	GO:0006606//protein import into nucleus;GO:0006626//protein targeting to mitochondrion;GO:0051604//protein maturation;GO:0006406//mRNA export from nucleus	GO:0005515//protein binding	GO:0005743//mitochondrial inner membrane;GO:0009536//plastid;GO:0005741//mitochondrial outer membrane;GO:0005634//nucleus
516	CSE_Unigene20542	SW_Unigene6085	-	-	+(Mostly)	1542	0.996	6	3	3	0.3781	0.210143	gi|147804692|emb|CAN62615.1|	hypothetical protein VITISV_036164 [Vitis vinifera]	gi|359484742|ref|XM_002263582.2|	PREDICTED: Vitis vinifera probable leucine-rich repeat receptor-like protein kinase At4g00330-like (LOC100250654), mRNA	sp|Q9ASQ5|CRCK3_ARATH	Calmodulin-binding receptor-like cytoplasmic kinase 3 OS=Arabidopsis thaliana GN=CRCK3 PE=2 SV=1	COG0515	Serine/threonine protein kinase	K04733	aly:ARALYDRAFT_916421	interleukin-1 receptor-associated kinase 4 [EC:2.7.11.1]	GO:0006468//protein phosphorylation;GO:0031348//negative regulation of defense response;GO:0009627//systemic acquired resistance;GO:0030968//endoplasmic reticulum unfolded protein response;GO:0009863//salicylic acid mediated signaling pathway;GO:0009697//salicylic acid biosynthetic process	GO:0004674//protein serine/threonine kinase activity;GO:0005524//ATP binding;GO:0004715//non-membrane spanning protein tyrosine kinase activity	GO:0016023//cytoplasmic membrane-bounded vesicle;GO:0005886//plasma membrane
517	CSE_CL322_Contig1	SW_Unigene22699	-	-	+(Mostly)	762	0.988	9	5	4	0.241429	0.0375288	gi|147822285|emb|CAN72910.1|	hypothetical protein VITISV_018847 [Vitis vinifera]	gi|349720493|emb|FQ381740.1|	Vitis vinifera clone SS0ABG86YB13	-	-	COG5474	Uncharacterized conserved protein	-	-	-	GO:0016226//iron-sulfur cluster assembly;GO:0010275//NAD(P)H dehydrogenase complex assembly;GO:0009073//aromatic amino acid family biosynthetic process	-	GO:0005739//mitochondrion;GO:0009535//chloroplast thylakoid membrane;GO:0009570//chloroplast stroma;GO:0005634//nucleus
518	CSE_Unigene12276	SW_Unigene14453	-	-	+(Mostly)	654	0.983	5	2	3	0.562515	0.415099	gi|342160856|gb|AEL16464.1|	peroxiredoxin Q [Vitis vinifera]	gi|349703575|emb|FQ383514.1|	Vitis vinifera clone SS0ABG1YK11	sp|Q6QPJ6|PRXQ_POPJC	Peroxiredoxin Q, chloroplastic OS=Populus jackii GN=PRXQ PE=1 SV=1	COG1225	Peroxiredoxin	K03564	vvi:100250698	peroxiredoxin Q/BCP [EC:1.11.1.15]	GO:0055114//oxidation-reduction process	GO:0004601//peroxidase activity;GO:0051920//peroxiredoxin activity	GO:0009533//chloroplast stromal thylakoid;GO:0010287//plastoglobule;GO:0009941//chloroplast envelope;GO:0009535//chloroplast thylakoid membrane
519	CSE_Unigene13739	SW_Unigene16603	-	-	+(Mostly)	1947	0.99	19	12	7	0.214555	0.00105381	gi|225444667|ref|XP_002277280.1|	PREDICTED: chlorophyll a-b binding protein, chloroplastic [Vitis vinifera] >gi|297738533|emb|CBI27778.3| unnamed protein product [Vitis vinifera]	gi|225444666|ref|XM_002277244.1|	PREDICTED: Vitis vinifera chlorophyll a-b binding protein, chloroplastic-like (LOC100243962), mRNA	sp|P10708|CB12_SOLLC	Chlorophyll a-b binding protein 7, chloroplastic OS=Solanum lycopersicum GN=CAB7 PE=3 SV=1	-	-	K08908	vvi:100243962	light-harvesting complex I chlorophyll a/b binding protein 2	GO:0010155//regulation of proton transport;GO:0006098//pentose-phosphate shunt;GO:0010218//response to far red light;GO:0009744//response to sucrose stimulus;GO:0010114//response to red light;GO:0030003//cellular cation homeostasis;GO:0019288//isopentenyl diphosphate biosynthetic process, mevalonate-independent pathway;GO:0009765//photosynthesis, light harvesting;GO:0009637//response to blue ligh…	GO:0046872//metal ion binding;GO:0016168//chlorophyll binding	GO:0016020//membrane;GO:0009507//chloroplast;GO:0030076//light-harvesting complex
520	CSE_Unigene911	SW_Unigene16193	-	-	+(Mostly)	1191	0.975	24	12.8368	11.1632	0.270752	0.00136	gi|383216818|gb|AFG73688.1|	12-oxophytodienoate reductase 3 protein [Vitis vinifera]	gi|359484433|ref|XM_002279277.2|	PREDICTED: Vitis vinifera 12-oxophytodienoate reductase 3-like (LOC100262732), mRNA	sp|Q9FEW9|OPR3_SOLLC	12-oxophytodienoate reductase 3 OS=Solanum lycopersicum GN=OPR3 PE=1 SV=1	COG1902	NADH:flavin oxidoreductases, Old Yellow Enzyme family	K05894	osa:4345762	12-oxophytodienoic acid reductase [EC:1.3.1.42]	GO:0010193//response to ozone;GO:0055114//oxidation-reduction process;GO:0009620//response to fungus;GO:0009611//response to wounding;GO:0009695//jasmonic acid biosynthetic process;GO:0031408//oxylipin biosynthetic process	GO:0016629//12-oxophytodienoate reductase activity;GO:0010181//FMN binding	GO:0005829//cytosol;GO:0005777//peroxisome
521	CSE_Unigene17928	SW_Unigene17676	-	-	+(Mostly)	3270	0.991	27	21	6	0.118446	2.9689e-07	gi|359484435|ref|XP_002279485.2|	PREDICTED: RNA polymerase-associated protein CTR9 homolog [Vitis vinifera] >gi|297738576|emb|CBI27821.3| unnamed protein product [Vitis vinifera]	gi|359484434|ref|XM_002279449.2|	PREDICTED: Vitis vinifera RNA polymerase-associated protein CTR9 homolog (LOC100252478), mRNA	sp|Q8RVB2|SPY_SOLLC	Probable UDP-N-acetylglucosamine-peptide N-acetylglucosaminyltransferase SPINDLY OS=Solanum lycopersicum GN=SPY PE=2 SV=1	COG0457	FOG: TPR repeat	K15176	vvi:100252478	RNA polymerase-associated protein CTR9	GO:0009630//gravitropism;GO:0006346//methylation-dependent chromatin silencing;GO:0031048//chromatin silencing by small RNA;GO:0007131//reciprocal meiotic recombination;GO:0051567//histone H3-K9 methylation;GO:0016579//protein deubiquitination;GO:0009910//negative regulation of flower development;GO:0010638//positive regulation of organelle organization;GO:0033044//regulation of chromosome organi…	-	GO:0016020//membrane;GO:0005634//nucleus
522	CSE_Unigene16534	SW_Unigene21836	-	-	+(Mostly)	951	0.993	7	6	1	0.0584326	0.00162664	gi|359484451|ref|XP_002280213.2|	PREDICTED: protein bem46-like [Vitis vinifera] >gi|297738598|emb|CBI27843.3| unnamed protein product [Vitis vinifera]	gi|359484450|ref|XM_002280177.2|	PREDICTED: Vitis vinifera protein bem46-like (LOC100245712), mRNA	-	-	COG1073	Hydrolases of the alpha/beta superfamily	K06889	pop:POPTR_1105469		GO:0009958//positive gravitropism;GO:0048364//root development;GO:0009638//phototropism;GO:0048573//photoperiodism, flowering;GO:0006508//proteolysis;GO:0009415//response to water stimulus	GO:0008236//serine-type peptidase activity	GO:0019866//organelle inner membrane;GO:0016023//cytoplasmic membrane-bounded vesicle;GO:0005773//vacuole;GO:0005783//endoplasmic reticulum;GO:0005634//nucleus;GO:0005886//plasma membrane;GO:0048046//apoplast
523	CSE_Unigene14366	SW_Unigene10316	-	-	+(Mostly)	963	0.993	7	7	NA	0	NA	gi|225444830|ref|XP_002280723.1|	PREDICTED: WD repeat-containing protein 61 [Vitis vinifera] >gi|297738621|emb|CBI27866.3| unnamed protein product [Vitis vinifera]	gi|359484456|ref|XM_002280687.2|	PREDICTED: Vitis vinifera WD repeat-containing protein 61-like (LOC100257752), mRNA	sp|O22212|PRP4L_ARATH	U4/U6 small nuclear ribonucleoprotein PRP4-like protein OS=Arabidopsis thaliana GN=EMB2776 PE=2 SV=1	COG2319	FOG: WD40 repeat	K12602	vvi:100257752	WD repeat-containing protein 61	GO:0009910//negative regulation of flower development;GO:0051568//histone H3-K4 methylation;GO:0010452//histone H3-K36 methylation	GO:0005515//protein binding;GO:0000166//nucleotide binding	GO:0005829//cytosol;GO:0080008//Cul4-RING ubiquitin ligase complex;GO:0005834//heterotrimeric G-protein complex
524	CSE_Unigene15178	SW_CL7929_Contig2	-	-	+(Mostly)	960	0.991	9	4	5	0.356019	0.118855	gi|225444834|ref|XP_002280767.1|	PREDICTED: uncharacterized protein LOC100252615 [Vitis vinifera]	gi|359484457|ref|XM_002280731.2|	PREDICTED: Vitis vinifera uncharacterized LOC100252615 (LOC100252615), mRNA	-	-	-	-	K15263	vvi:100252615	cell growth-regulating nucleolar protein	GO:0006626//protein targeting to mitochondrion	-	GO:0005622//intracellular
525	CSE_Unigene14374	SW_Unigene16739	-	-	+(Mostly)	663	0.982	12	3	9	1.04184	0.972969	gi|225444859|ref|XP_002281164.1|	PREDICTED: lycopene epsilon cyclase, chloroplastic [Vitis vinifera]	gi|359484467|ref|XM_002281128.2|	PREDICTED: Vitis vinifera lycopene epsilon cyclase, chloroplastic-like (LOC100259482), mRNA	sp|O65837|LCYE_SOLLC	Lycopene epsilon cyclase, chloroplastic OS=Solanum lycopersicum GN=CRTL-E-1 PE=2 SV=1	-	-	K06444	vvi:100259482	lycopene epsilon-cyclase [EC:5.5.1.18]	GO:0016117//carotenoid biosynthetic process	GO:0016705//oxidoreductase activity, acting on paired donors, with incorporation or reduction of molecular oxygen;GO:0016853//isomerase activity	GO:0009507//chloroplast
526	CSE_Unigene19920	SW_Unigene12494	-	-	+(Mostly)	1737	0.994	11	8	3	0.128266	0.00140927	gi|225444879|ref|XP_002281475.1|	PREDICTED: regulatory protein NPR1 [Vitis vinifera] >gi|297738647|emb|CBI27892.3| unnamed protein product [Vitis vinifera]	gi|359484473|ref|XM_002281439.2|	PREDICTED: Vitis vinifera regulatory protein NPR1-like (LOC100250996), mRNA	sp|P93002|NPR1_ARATH	Regulatory protein NPR1 OS=Arabidopsis thaliana GN=NPR1 PE=1 SV=1	-	-	K14508	vvi:100250996	regulatory protein NPR1	GO:0031348//negative regulation of defense response;GO:0009611//response to wounding;GO:0010200//response to chitin;GO:0050832//defense response to fungus;GO:0009625//response to insect;GO:0008219//cell death;GO:0009408//response to heat	-	GO:0005737//cytoplasm;GO:0005634//nucleus
527	CSE_Unigene11589	SW_Unigene6327	-	-	+(Mostly)	1695	0.992	14	5	9	0.787524	0.765158	gi|225444916|ref|XP_002279603.1|	PREDICTED: probable polyamine oxidase 5-like [Vitis vinifera]	gi|123663887|emb|AM464590.1|	Vitis vinifera, whole genome shotgun sequence, contig VV78X168410.7, clone ENTAV 115	sp|Q9SU79|PAO5_ARATH	Probable polyamine oxidase 5 OS=Arabidopsis thaliana GN=PAO5 PE=2 SV=1	-	-	K12259	gmx:100778778	spermine oxidase [EC:1.5.3.16]	GO:0055114//oxidation-reduction process	GO:0016491//oxidoreductase activity	-
528	CSE_Unigene21134	SW_Unigene22287	-	-	+(Mostly)	3528	0.989	40	16	24	0.497453	0.0413385	gi|225444993|ref|XP_002279892.1|	PREDICTED: uncharacterized protein LOC100256064 [Vitis vinifera] >gi|297738702|emb|CBI27947.3| unnamed protein product [Vitis vinifera]	gi|359484318|ref|XM_002279856.2|	PREDICTED: Vitis vinifera uncharacterized LOC100256064 (LOC100256064), mRNA	sp|Q7XTT4|NUCL2_ORYSJ	Nucleolin 2 OS=Oryza sativa subsp. japonica GN=Os04g0620700 PE=2 SV=2	COG0168	Trk-type K+ transport systems, membrane components	K03453	vcn:VOLCADRAFT_102664	bile acid:Na+ symporter, BASS family	-	-	-
529	CSE_Unigene19835	SW_Unigene18443	-	-	+(Mostly)	990	0.992	8	5	3	0.148601	0.0102889	gi|225445104|ref|XP_002283713.1|	PREDICTED: probable iron/ascorbate oxidoreductase DDB_G0283291-like isoform 2 [Vitis vinifera]	gi|225445103|ref|XM_002283677.1|	PREDICTED: Vitis vinifera probable iron/ascorbate oxidoreductase DDB_G0283291-like, transcript variant 2 (LOC100244088), mRNA	sp|Q40062|IDS3_HORVU	2'-deoxymugineic-acid 2'-dioxygenase OS=Hordeum vulgare GN=IDS3 PE=1 SV=3	COG3491	Isopenicillin N synthase and related dioxygenases	K06892	vvi:100244088		GO:0051555//flavonol biosynthetic process;GO:0055114//oxidation-reduction process	GO:0045431//flavonol synthase activity;GO:0005506//iron ion binding;GO:0016702//oxidoreductase activity, acting on single donors with incorporation of molecular oxygen, incorporation of two atoms of oxygen	-
530	CSE_Unigene4951	SW_Unigene17944	-	-	+(Mostly)	540	0.993	4	1.64994	2.35006	0.445208	0.239637	gi|225445190|ref|XP_002284205.1|	PREDICTED: rac-like GTP-binding protein ARAC7 isoform 1 [Vitis vinifera] >gi|147781539|emb|CAN73708.1| hypothetical protein VITISV_023715 [Vitis vinifera] >gi|297738799|emb|CBI28044.3| unnamed protein product [Vitis vinifera]	gi|359484568|ref|XM_002284169.2|	PREDICTED: Vitis vinifera rac-like GTP-binding protein ARAC7, transcript variant 1 (LOC100266265), mRNA	sp|O82480|RAC7_ARATH	Rac-like GTP-binding protein ARAC7 OS=Arabidopsis thaliana GN=ARAC7 PE=1 SV=1	COG1100	GTPase SAR1 and related small G proteins	K04392	vvi:100266265	Ras-related C3 botulinum toxin substrate 1	GO:0007015//actin filament organization;GO:0007264//small GTPase mediated signal transduction;GO:0006184//GTP catabolic process;GO:0015031//protein transport	GO:0004767//sphingomyelin phosphodiesterase activity;GO:0003924//GTPase activity;GO:0005525//GTP binding	GO:0005622//intracellular;GO:0005576//extracellular region;GO:0005886//plasma membrane
531	CSE_Unigene18168	SW_Unigene21911	-	-	+(Mostly)	1425	0.992	11	4	7	0.620019	0.457556	gi|225445192|ref|XP_002284217.1|	PREDICTED: cyclin-dependent kinase F-1 [Vitis vinifera]	gi|359484571|ref|XM_002284181.2|	PREDICTED: Vitis vinifera cyclin-dependent kinase F-1-like (LOC100261054), mRNA	sp|O80345|CDKF1_ARATH	Cyclin-dependent kinase F-1 OS=Arabidopsis thaliana GN=CDKF-1 PE=1 SV=1	COG0515	Serine/threonine protein kinase	K02202	ota:Ot07g01260	cyclin-dependent kinase 7 [EC:2.7.11.22 2.7.11.23]	GO:0000278//mitotic cell cycle;GO:0010078//maintenance of root meristem identity;GO:0010440//stomatal lineage progression;GO:0042023//DNA endoreduplication;GO:0045736//negative regulation of cyclin-dependent protein serine/threonine kinase activity	GO:0005515//protein binding;GO:0000166//nucleotide binding;GO:0004674//protein serine/threonine kinase activity;GO:0019912//cyclin-dependent protein kinase activating kinase activity	GO:0005829//cytosol;GO:0005634//nucleus
532	CSE_Unigene16174	SW_Unigene21434	-	-	+(Mostly)	1539	0.991	14	10	4	0.162991	0.00127612	gi|225445234|ref|XP_002280953.1|	PREDICTED: probable chlorophyll(ide) b reductase NYC1, chloroplastic [Vitis vinifera] >gi|297738824|emb|CBI28069.3| unnamed protein product [Vitis vinifera]	gi|225445233|ref|XM_002280917.1|	PREDICTED: Vitis vinifera probable chlorophyll(ide) b reductase NYC1, chloroplastic-like (LOC100259397), mRNA	sp|Q5N800|NYC1_ORYSJ	Probable chlorophyll(ide) b reductase NYC1, chloroplastic OS=Oryza sativa subsp. japonica GN=NYC1 PE=1 SV=1	COG1028	Dehydrogenases with different specificities (related to short-chain alcohol dehydrogenases)	K13606	vvi:100259397	chlorophyll(ide) b reductase [EC:1.1.1.294]	GO:0055114//oxidation-reduction process;GO:0010304//PSII associated light-harvesting complex II catabolic process;GO:0015996//chlorophyll catabolic process	GO:0034256//chlorophyll(ide) b reductase activity;GO:0000166//nucleotide binding;GO:0047936//glucose 1-dehydrogenase [NAD(P)] activity	GO:0016021//integral to membrane;GO:0009535//chloroplast thylakoid membrane;GO:0042170//plastid membrane
533	CSE_CL479_Contig2	SW_Unigene6177	-	-	+(Mostly)	873	0.967	11	6	5	0.257259	0.0268016	gi|225445248|ref|XP_002281028.1|	PREDICTED: heat stress transcription factor C-1 [Vitis vinifera] >gi|147779536|emb|CAN72162.1| hypothetical protein VITISV_009631 [Vitis vinifera] >gi|297738829|emb|CBI28074.3| unnamed protein product [Vitis vinifera]	gi|225445247|ref|XM_002280992.1|	PREDICTED: Vitis vinifera heat stress transcription factor C-1-like (LOC100250904), mRNA	sp|Q9LV52|HSFC1_ARATH	Heat stress transcription factor C-1 OS=Arabidopsis thaliana GN=HSFC1 PE=2 SV=1	COG5169	Heat shock transcription factor	-	-	-	GO:0006355//regulation of transcription, DNA-dependent;GO:0009407//toxin catabolic process	GO:0043565//sequence-specific DNA binding;GO:0003700//sequence-specific DNA binding transcription factor activity	GO:0005634//nucleus
534	CSE_Unigene15280	SW_Unigene22636	-	-	+(Mostly)	1572	0.993	11	7	4	0.209268	0.0116122	gi|297738859|emb|CBI28104.3|	unnamed protein product [Vitis vinifera]	gi|359484609|ref|XM_002281317.2|	PREDICTED: Vitis vinifera protein mrp homolog (LOC100250898), mRNA	sp|Q20EV4|MIND_OLTVI	Putative septum site-determining protein MinD OS=Oltmannsiellopsis viridis GN=minD PE=3 SV=1	COG0489	ATPases involved in chromosome partitioning	K03593	vvi:100242483	ATP-binding protein involved in chromosome partitioning	GO:0006098//pentose-phosphate shunt;GO:0016117//carotenoid biosynthetic process;GO:0043085//positive regulation of catalytic activity;GO:0019252//starch biosynthetic process;GO:0019288//isopentenyl diphosphate biosynthetic process, mevalonate-independent pathway;GO:0009902//chloroplast relocation;GO:0015979//photosynthesis;GO:0000023//maltose metabolic process;GO:0015995//chlorophyll biosynthetic…	GO:0005524//ATP binding	GO:0009570//chloroplast stroma
535	CSE_Unigene16183	SW_Unigene21686	-	-	+(Mostly)	1272	0.996	5	1	4	1.30287	0.755333	gi|359484612|ref|XP_003633131.1|	PREDICTED: 3-hydroxyisobutyryl-CoA hydrolase-like protein 3, mitochondrial-like isoform 2 [Vitis vinifera]	gi|359484611|ref|XM_003633083.1|	PREDICTED: Vitis vinifera 3-hydroxyisobutyryl-CoA hydrolase-like protein 3, mitochondrial-like, transcript variant 2 (LOC100261210), mRNA	sp|Q9T0K7|HIBC6_ARATH	3-hydroxyisobutyryl-CoA hydrolase-like protein 3, mitochondrial OS=Arabidopsis thaliana GN=At4g13360 PE=1 SV=2	COG1024	Enoyl-CoA hydratase/carnithine racemase	K05605	aly:ARALYDRAFT_668778	3-hydroxyisobutyryl-CoA hydrolase [EC:3.1.2.4]	GO:0008152//metabolic process	GO:0004300//enoyl-CoA hydratase activity;GO:0016787//hydrolase activity;GO:0016853//isomerase activity	GO:0016020//membrane;GO:0005829//cytosol;GO:0005739//mitochondrion
536	CSE_CL2911_Contig4	SW_CL3539_Contig4	-	-	+(Mostly)	1251	0.995	6	3	3	0.372599	0.205196	gi|297738888|emb|CBI28133.3|	unnamed protein product [Vitis vinifera]	gi|359484380|ref|XM_002284884.2|	PREDICTED: Vitis vinifera uncharacterized LOC100254194 (LOC100254194), mRNA	sp|Q1EBV7|BASS2_ARATH	Sodium/pyruvate cotransporter BASS2, chloroplastic OS=Arabidopsis thaliana GN=BASS2 PE=2 SV=1	COG0385	Predicted Na+-dependent transporter	K03453	vvi:100254194	bile acid:Na+ symporter, BASS family	GO:0006849//plasma membrane pyruvate transport;GO:0035725//sodium ion transmembrane transport;GO:0000023//maltose metabolic process;GO:0019252//starch biosynthetic process;GO:0019761//glucosinolate biosynthetic process;GO:0043085//positive regulation of catalytic activity	GO:0050833//pyruvate transmembrane transporter activity;GO:0008508//bile acid:sodium symporter activity	GO:0016021//integral to membrane;GO:0009941//chloroplast envelope;GO:0009534//chloroplast thylakoid
537	CSE_Unigene16387	SW_Unigene22218	-	-	+(Mostly)	1143	0.994	7	5	2	0.118334	0.00866271	gi|225445416|ref|XP_002285026.1|	PREDICTED: probable protein arginine N-methyltransferase 4.2 [Vitis vinifera]	gi|225445415|ref|XM_002284990.1|	PREDICTED: Vitis vinifera probable protein arginine N-methyltransferase 4.2-like (LOC100262845), mRNA	sp|Q9MAT5|ANM10_ARATH	Protein arginine N-methyltransferase PRMT10 OS=Arabidopsis thaliana GN=PRMT10 PE=1 SV=1	COG0500	SAM-dependent methyltransferases	K11434	vvi:100262845	protein arginine N-methyltransferase 1 [EC:2.1.1.-]	GO:0034968//histone lysine methylation;GO:0009909//regulation of flower development;GO:0019919//peptidyl-arginine methylation, to asymmetrical-dimethyl arginine;GO:0010228//vegetative to reproductive phase transition of meristem;GO:0034969//histone arginine methylation	GO:0035241//protein-arginine omega-N monomethyltransferase activity;GO:0008469//histone-arginine N-methyltransferase activity;GO:0016277//[myelin basic protein]-arginine N-methyltransferase activity;GO:0035242//protein-arginine omega-N asymmetric methyltransferase activity	GO:0005829//cytosol;GO:0005634//nucleus
538	CSE_Unigene20041	SW_Unigene13882	-	-	+(Mostly)	1413	0.994	9	4	5	0.386165	0.141206	gi|225445567|ref|XP_002285333.1|	PREDICTED: BRCA1-associated protein [Vitis vinifera] >gi|297738981|emb|CBI28226.3| unnamed protein product [Vitis vinifera]	gi|359484205|ref|XM_002285297.2|	PREDICTED: Vitis vinifera BRCA1-associated protein-like (LOC100249232), mRNA	-	-	COG5207	Isopeptidase T	K10632	vvi:100249232	BRCA1-associated protein [EC:6.3.2.19]	GO:0010029//regulation of seed germination	GO:0004842//ubiquitin-protein ligase activity;GO:0008270//zinc ion binding;GO:0046982//protein heterodimerization activity	GO:0005737//cytoplasm;GO:0000151//ubiquitin ligase complex
539	CSE_Unigene12759	SW_Unigene10354	-	-	+(Mostly)	1437	0.987	18	7	11	0.687453	0.444632	gi|359484849|ref|XP_002275774.2|	PREDICTED: APO protein 2, chloroplastic-like [Vitis vinifera]	gi|359484848|ref|XM_002275738.2|	PREDICTED: Vitis vinifera APO protein 2, chloroplastic-like (LOC100244952), mRNA	sp|Q8W4A5|APO2_ARATH	APO protein 2, chloroplastic OS=Arabidopsis thaliana GN=APO2 PE=2 SV=1	-	-	-	-	-	GO:0010155//regulation of proton transport;GO:0009793//embryo development ending in seed dormancy;GO:0019252//starch biosynthetic process;GO:0000023//maltose metabolic process;GO:0016556//mRNA modification;GO:0016226//iron-sulfur cluster assembly;GO:0046777//protein autophosphorylation;GO:0009637//response to blue light;GO:0019761//glucosinolate biosynthetic process;GO:0009073//aromatic amino aci…	GO:0009055//electron carrier activity;GO:0003723//RNA binding;GO:0005507//copper ion binding	GO:0009507//chloroplast
540	CSE_Unigene14406	SW_Unigene14254	-	-	+(Mostly)	816	0.987	11	2	9	1.38087	0.948082	gi|225445818|ref|XP_002276984.1|	PREDICTED: translation initiation factor IF-3 [Vitis vinifera] >gi|297743667|emb|CBI36550.3| unnamed protein product [Vitis vinifera]	gi|225445817|ref|XM_002276948.1|	PREDICTED: Vitis vinifera translation initiation factor IF-3-like (LOC100243384), mRNA	sp|Q85G77|IF3C_CYAME	Translation initiation factor IF-3, chloroplastic OS=Cyanidioschyzon merolae GN=infC PE=3 SV=1	COG0290	Translation initiation factor 3 (IF-3)	K02520	vvi:100243384	translation initiation factor IF-3	GO:0006413//translational initiation;GO:0045036//protein targeting to chloroplast;GO:0009793//embryo development ending in seed dormancy;GO:0019288//isopentenyl diphosphate biosynthetic process, mevalonate-independent pathway;GO:0016226//iron-sulfur cluster assembly;GO:0045893//positive regulation of transcription, DNA-dependent;GO:0009073//aromatic amino acid family biosynthetic process	GO:0003743//translation initiation factor activity	GO:0009507//chloroplast;GO:0005618//cell wall
541	CSE_CL6287_Contig1	SW_CL1419_Contig4	-	-	+(Mostly)	1104	0.996	4	2	2	0.343637	0.267972	gi|359484818|ref|XP_003633169.1|	PREDICTED: autophagy-related protein 18-like [Vitis vinifera]	gi|359484817|ref|XM_003633121.1|	PREDICTED: Vitis vinifera autophagy-related protein 18-like (LOC100854449), mRNA	-	-	-	-	-	-	-	GO:0000045//autophagic vacuole assembly	GO:0080025//phosphatidylinositol-3,5-bisphosphate binding;GO:0032266//phosphatidylinositol-3-phosphate binding	GO:0000421//autophagic vacuole membrane;GO:0034045//pre-autophagosomal structure membrane;GO:0005829//cytosol
542	CSE_Unigene18071	SW_Unigene12967	-	-	+(Mostly)	1377	0.993	10	5	5	0.364689	0.101216	gi|229609829|gb|ACQ83530.1|	CBL-interacting protein kinase 14 [Vitis vinifera]	gi|359485044|ref|XM_002277369.2|	PREDICTED: Vitis vinifera CBL-interacting protein kinase 14 (CIPK14), mRNA	sp|Q94CG0|CIPKL_ARATH	CBL-interacting serine/threonine-protein kinase 21 OS=Arabidopsis thaliana GN=CIPK21 PE=1 SV=1	COG0515	Serine/threonine protein kinase	K00924	osa:4342410	[EC:2.7.1.-]	GO:0006468//protein phosphorylation;GO:0097305//response to alcohol;GO:0009725//response to hormone stimulus;GO:0009628//response to abiotic stimulus;GO:0031667//response to nutrient levels;GO:0006813//potassium ion transport;GO:0007165//signal transduction;GO:0006950//response to stress	GO:0005524//ATP binding;GO:0004683//calmodulin-dependent protein kinase activity	GO:0005737//cytoplasm;GO:0005634//nucleus
543	CSE_CL1886_Contig6	SW_Unigene9818	-	-	+(Mostly)	927	0.996	4	3	1	0.0985712	0.0370708	gi|225446046|ref|XP_002270836.1|	PREDICTED: uncharacterized protein LOC100263238 [Vitis vinifera]	gi|225446045|ref|XM_002270800.1|	PREDICTED: Vitis vinifera uncharacterized LOC100263238 (LOC100263238), mRNA	-	-	COG1196	Chromosome segregation ATPases	K06085	ppp:PHYPADRAFT_186245	synovial sarcoma, X breakpoint 2 interacting protein	GO:0046686//response to cadmium ion	-	GO:0005634//nucleus
544	CSE_Unigene19704	SW_Unigene11683	-	-	+(Mostly)	1170	0.991	5	4	1	0.0797138	0.013117	gi|225446028|ref|XP_002269944.1|	PREDICTED: probable receptor-like serine/threonine-protein kinase At5g57670 [Vitis vinifera] >gi|297735406|emb|CBI17846.3| unnamed protein product [Vitis vinifera]	gi|225446027|ref|XM_002269908.1|	PREDICTED: Vitis vinifera probable receptor-like serine/threonine-protein kinase At5g57670 (LOC100266827), mRNA	sp|Q5XF57|Y5576_ARATH	Probable receptor-like serine/threonine-protein kinase At5g57670 OS=Arabidopsis thaliana GN=At5g57670 PE=2 SV=1	COG0515	Serine/threonine protein kinase	K04733	smo:SELMODRAFT_33807	interleukin-1 receptor-associated kinase 4 [EC:2.7.11.1]	GO:0006468//protein phosphorylation	GO:0005524//ATP binding;GO:0004674//protein serine/threonine kinase activity	GO:0005634//nucleus
545	CSE_Unigene11874	SW_CL5995_Contig1	-	-	+(Mostly)	1602	0.989	15	11	4	0.147494	0.000488301	gi|359484929|ref|XP_002262945.2|	PREDICTED: preprotein translocase subunit secY, chloroplastic-like [Vitis vinifera]	gi|359484928|ref|XM_002262909.2|	PREDICTED: Vitis vinifera preprotein translocase subunit secY, chloroplastic-like (LOC100248517), mRNA	sp|Q38885|SCY1_ARATH	Preprotein translocase subunit SCY1, chloroplastic OS=Arabidopsis thaliana GN=SCY1 PE=1 SV=2	COG0201	Preprotein translocase subunit SecY	K10956	aly:ARALYDRAFT_480774	protein transport protein SEC61 subunit alpha	GO:0009306//protein secretion;GO:0006354//DNA-dependent transcription, elongation;GO:0010027//thylakoid membrane organization	GO:0015450//P-P-bond-hydrolysis-driven protein transmembrane transporter activity;GO:0005515//protein binding	GO:0016021//integral to membrane;GO:0009535//chloroplast thylakoid membrane
546	CSE_Unigene18817	SW_Unigene16364	-	-	+(Mostly)	1308	0.989	14	9	5	0.193327	0.00286265	gi|225462522|ref|XP_002264528.1|	PREDICTED: galacturonokinase [Vitis vinifera] >gi|296090474|emb|CBI40670.3| unnamed protein product [Vitis vinifera]	gi|225462521|ref|XM_002264492.1|	PREDICTED: Vitis vinifera galacturonokinase-like (LOC100261773), mRNA	sp|Q8VYG2|GALAK_ARATH	Galacturonokinase OS=Arabidopsis thaliana GN=GALAK PE=1 SV=1	COG0153	Galactokinase	K00849	vvi:100261773	galactokinase [EC:2.7.1.6]	GO:0046835//carbohydrate phosphorylation;GO:0046396//D-galacturonate metabolic process;GO:0006012//galactose metabolic process	GO:0005524//ATP binding;GO:0004335//galactokinase activity;GO:0047912//galacturonokinase activity	GO:0005829//cytosol
547	CSE_Unigene18573	SW_Unigene10509	-	-	+(Mostly)	333	0.997	1	1	NA	0	NA	gi|225446891|ref|XP_002284045.1|	PREDICTED: endoplasmic reticulum-Golgi intermediate compartment protein 3 [Vitis vinifera] >gi|296086333|emb|CBI31774.3| unnamed protein product [Vitis vinifera]	gi|359485155|ref|XM_002284009.2|	PREDICTED: Vitis vinifera endoplasmic reticulum-Golgi intermediate compartment protein 3-like (LOC100260862), mRNA	sp|Q9LJU2|PDI53_ARATH	Protein disulfide-isomerase 5-3 OS=Arabidopsis thaliana GN=PDIL5-3 PE=2 SV=1	-	-	-	-	-	-	-	GO:0005783//endoplasmic reticulum
548	CSE_Unigene12573	SW_CL4464_Contig2	-	-	+(Mostly)	1272	0.99	10	7	3	0.165406	0.00695228	gi|462396428|gb|EMJ02227.1|	hypothetical protein PRUPE_ppa005657mg [Prunus persica]	gi|359485748|ref|XM_002264383.2|	PREDICTED: Vitis vinifera protein trpH-like (LOC100245053), mRNA	-	-	COG0613	Predicted metal-dependent phosphoesterases (PHP family)	K07053	vvi:100245053		GO:0006260//DNA replication	GO:0003887//DNA-directed DNA polymerase activity;GO:0003677//DNA binding	GO:0005737//cytoplasm
549	CSE_Unigene14547	SW_CL6373_Contig2	-	-	+(Mostly)	2028	0.994	13	7	6	0.36291	0.0605778	gi|225446513|ref|XP_002278771.1|	PREDICTED: GTP-binding protein TypA/BipA homolog isoform 1 [Vitis vinifera] >gi|302143376|emb|CBI21937.3| unnamed protein product [Vitis vinifera]	gi|225446512|ref|XM_002278735.1|	PREDICTED: Vitis vinifera GTP-binding protein TypA/BipA homolog-like, transcript variant 1 (LOC100247278), mRNA	sp|B9GHA6|GUFP_POPTR	Translation factor GUF1 homolog, chloroplastic OS=Populus trichocarpa GN=POPTRDRAFT_815670 PE=3 SV=1	COG1217	Predicted membrane GTPase involved in stress response	K06207	vvi:100247278	GTP-binding protein	GO:0006184//GTP catabolic process;GO:0006626//protein targeting to mitochondrion	GO:0003746//translation elongation factor activity;GO:0005525//GTP binding;GO:0003924//GTPase activity	GO:0009507//chloroplast;GO:0005886//plasma membrane;GO:0005739//mitochondrion
550	CSE_Unigene16108	SW_Unigene2002	-	-	+(Mostly)	1062	0.993	7	2	5	0.861494	0.875075	gi|225446553|ref|XP_002279537.1|	PREDICTED: uncharacterized protein HI_0077-like [Vitis vinifera]	gi|359485274|ref|XM_002279501.2|	PREDICTED: Vitis vinifera uncharacterized LOC100265975 (LOC100265975), mRNA	-	-	COG2833	Uncharacterized protein conserved in bacteria	-	-	-	GO:0055114//oxidation-reduction process	GO:0046914//transition metal ion binding;GO:0016491//oxidoreductase activity	GO:0005739//mitochondrion;GO:0009507//chloroplast
551	CSE_Unigene16696	SW_Unigene10656	-	-	+(Mostly)	876	0.989	10	7	3	0.14973	0.00461729	gi|359485436|ref|XP_002280009.2|	PREDICTED: uncharacterized protein LOC100245387 [Vitis vinifera]	gi|359485435|ref|XM_002279973.2|	PREDICTED: Vitis vinifera uncharacterized LOC100245387 (LOC100245387), mRNA	sp|Q681Q7|Y1390_ARATH	Uncharacterized protein At1g03900 OS=Arabidopsis thaliana GN=At1g03900 PE=2 SV=1	-	-	-	-	-	GO:0006897//endocytosis;GO:0032259//methylation	GO:0008168//methyltransferase activity	GO:0016020//membrane;GO:0005737//cytoplasm;GO:0005634//nucleus
[truncated: 467 more rows]

## Sheet: tableS3
Table S3 List of individuals included in this study, with corresponding sampling localities and GenBank accession numbers
[truncated: 32 more rows]
